# Supplementary material for: Reinforcing the North Atlantic backbone: revision and extension of the composite splice at ODP Site 982
Source: Copernicus journal article supplement (doi:10.5194/cp-14-321-2018), 2018-03-08
Supplement: Supplementary file 1 [file ST1 - XRF data.xlsx]

## Sheet: Site 982 XRF data splice
IODP-ID	mbsf	mcd (shipboard)	rmcd (this study)	AgeD17MT (this study)	AgeD17FT (this study)	Silica (counts)	Zirconium (counts)	ln(Silica) (counts)
162-982A-12H-3-A 44	106.64	120.13	120.13	4.4786	4.4786	1320	10	7.18539
162-982A-12H-3-A 46	106.66	120.15	120.15	4.47915	4.47915	1528	66	7.33172
162-982A-12H-3-A 48.5	106.69	120.18	120.18	4.47998	4.47998	1212	59	7.10003
162-982A-12H-3-A 51	106.71	120.2	120.2	4.48053	4.48053	1237	25	7.12044
162-982A-12H-3-A 54	106.74	120.23	120.23	4.48135	4.48135	1196	118	7.08674
162-982A-12H-3-A 57	106.77	120.26	120.26	4.48218	4.48218	1151	72	7.04839
162-982A-12H-3-A 59	106.79	120.28	120.28	4.48273	4.48273	1066	52	6.97167
162-982A-12H-3-A 60	106.8	120.29	120.29	4.48301	4.48301	917	42	6.82111
162-982A-12H-3-A 62	106.82	120.31	120.31	4.48356	4.48356	1173	42	7.06732
162-982A-12H-3-A 64	106.84	120.33	120.33	4.48411	4.48411	1208	24	7.09672
162-982A-12H-3-A 65	106.85	120.34	120.34	4.48439	4.48439	1329	24	7.19218
162-982A-12H-3-A 67.5	106.88	120.37	120.37	4.48521	4.48521	1209	55	7.09755
162-982A-12H-3-A 70	106.9	120.39	120.39	4.48576	4.48576	1223	45	7.10906
162-982A-12H-3-A 72	106.92	120.41	120.41	4.48632	4.48632	1245	28	7.12689
162-982A-12H-3-A 73	106.93	120.42	120.42	4.48659	4.48659	1203	22	7.09257
162-982A-12H-3-A 77	106.97	120.46	120.46	4.48769	4.48769	1326	28	7.18992
162-982A-12H-3-A 79	106.99	120.48	120.48	4.48825	4.48825	1281	113	7.1554
162-982A-12H-3-A 81	107.01	120.5	120.5	4.4888	4.4888	1123	37	7.02376
162-982A-12H-3-A 82	107.02	120.51	120.51	4.48907	4.48907	1266	80	7.14362
162-982A-12H-3-A 84	107.04	120.53	120.53	4.48962	4.48962	1099	8	7.00216
162-982A-12H-3-A 90	107.1	120.59	120.59	4.49128	4.49128	1091	53	6.99485
162-982A-12H-3-A 91	107.11	120.6	120.6	4.49155	4.49155	1121	19	7.02198
162-982A-12H-3-A 92	107.12	120.61	120.61	4.49183	4.49183	1107	6	7.00941
162-982A-12H-3-A 93	107.13	120.62	120.62	4.4921	4.4921	1231	47	7.11558
162-982A-12H-3-A 95	107.15	120.64	120.64	4.49266	4.49266	1025	50	6.93245
162-982A-12H-3-A 100	107.2	120.69	120.69	4.49403	4.49403	1152	24	7.04925
162-982A-12H-3-A 102	107.22	120.71	120.71	4.49459	4.49459	1277	24	7.15227
162-982A-12H-3-A 103	107.23	120.72	120.72	4.49486	4.49486	1219	64	7.10579
162-982A-12H-3-A 105	107.25	120.74	120.74	4.49541	4.49541	1084	52	6.98841
162-982A-12H-3-A 109	107.29	120.78	120.78	4.49651	4.49651	1051	50	6.9575
162-982A-12H-3-A 110	107.3	120.79	120.79	4.49679	4.49679	1035	74	6.94216
162-982A-12H-3-A 112	107.32	120.81	120.81	4.49734	4.49734	1114	85	7.01571
162-982A-12H-3-A 114	107.34	120.83	120.83	4.49789	4.49789	1025	32	6.93245
162-982A-12H-3-A 119	107.39	120.88	120.88	4.49927	4.49927	1080	16	6.98472
162-982A-12H-3-A 120	107.4	120.89	120.89	4.49955	4.49955	918	27	6.8222
162-982A-12H-3-A 122	107.42	120.91	120.91	4.5001	4.5001	1051	70	6.9575
162-982A-12H-3-A 123	107.43	120.92	120.92	4.50037	4.50037	1029	47	6.93634
162-982A-12H-3-A 125	107.45	120.94	120.94	4.50092	4.50092	1126	50	7.02643
162-982A-12H-3-A 128	107.48	120.97	120.97	4.50175	4.50175	1153	50	7.05012
162-982A-12H-3-A 130	107.5	120.99	120.99	4.5023	4.5023	1190	24	7.08171
162-982A-12H-3-A 131	107.51	121	121	4.50258	4.50258	1225	0	7.1107
162-982A-12H-3-A 132	107.52	121.01	121.01	4.50285	4.50285	1493	72	7.30854
162-982A-12H-3-A 134	107.54	121.03	121.03	4.50341	4.50341	1070	28	6.97541
162-982A-12H-3-A 136	107.56	121.05	121.05	4.50396	4.50396	1229	65	7.11396
162-982A-12H-3-A 138	107.58	121.07	121.07	4.50451	4.50451	976	44	6.88346
162-982A-12H-3-A 140	107.6	121.09	121.09	4.50506	4.50506	1246	66	7.12769
162-982A-12H-3-A 142	107.62	121.11	121.11	4.50561	4.50561	1163	62	7.05876
162-982A-12H-3-A 145	107.65	121.14	121.14	4.50644	4.50644	1376	68	7.22694
162-982A-12H-3-A 146	107.66	121.15	121.15	4.50671	4.50671	1290	77	7.1624
162-982A-12H-3-A 149	107.69	121.18	121.18	4.50754	4.50754	1245	63	7.12689
162-982A-12H-4-A 2	107.72	121.21	121.21	4.50837	4.50837	1194	19	7.08506
162-982A-12H-4-A 8.5	107.79	121.28	121.28	4.5103	4.5103	1253	91	7.1333
162-982A-12H-4-A 10.5	107.81	121.3	121.3	4.51085	4.51085	1687	87	7.43071
162-982A-12H-4-A 12.5	107.83	121.32	121.32	4.5114	4.5114	1287	-4	7.16007
162-982A-12H-4-A 14	107.84	121.33	121.33	4.51167	4.51167	1378	48	7.22839
162-982A-12H-4-A 18	107.88	121.37	121.37	4.51278	4.51278	1246	35	7.12769
162-982A-12H-4-A 21	107.91	121.4	121.4	4.5136	4.5136	1377	73	7.22766
162-982A-12H-4-A 22	107.92	121.41	121.41	4.51388	4.51388	1325	24	7.18917
162-982A-12H-4-A 23	107.93	121.42	121.42	4.51415	4.51415	1278	53	7.15305
162-982A-12H-4-A 25	107.95	121.44	121.44	4.51471	4.51471	1396	66	7.24137
162-982A-12H-4-A 26	107.96	121.45	121.45	4.51498	4.51498	1288	35	7.16085
162-982A-12H-4-A 28	107.98	121.47	121.47	4.51553	4.51553	1255	37	7.13489
162-982A-12H-4-A 29	107.99	121.48	121.48	4.51581	4.51581	1331	80	7.19369
162-982A-12H-4-A 30	108	121.49	121.49	4.51608	4.51608	1200	67	7.09008
162-982A-12H-4-A 31	108.01	121.5	121.5	4.51636	4.51636	1342	47	7.20192
162-982A-12H-4-A 33	108.03	121.52	121.52	4.51691	4.51691	1110	22	7.01212
162-982A-12H-4-A 36	108.06	121.55	121.55	4.51774	4.51774	1258	72	7.13728
162-982A-12H-4-A 38	108.08	121.57	121.57	4.51829	4.51829	1039	64	6.94601
162-982A-12H-4-A 40	108.1	121.59	121.59	4.51884	4.51884	1133	80	7.03262
162-982A-12H-4-A 43	108.13	121.62	121.62	4.51967	4.51967	976	28	6.88346
162-982A-12H-4-A 44	108.14	121.63	121.63	4.51994	4.51994	892	-14	6.79347
162-982A-12H-4-A 46	108.16	121.65	121.65	4.52049	4.52049	953	27	6.85961
162-982A-12H-4-A 48	108.18	121.67	121.67	4.52105	4.52105	1021	62	6.92854
162-982A-12H-4-A 51	108.21	121.7	121.7	4.52187	4.52187	1304	90	7.17319
162-982A-12H-4-A 52	108.22	121.71	121.71	4.52215	4.52215	1030	30	6.93731
162-982A-12H-4-A 56	108.26	121.75	121.75	4.52325	4.52325	1162	48	7.0579
162-982A-12H-4-A 59	108.29	121.78	121.78	4.52408	4.52408	939	19	6.84482
162-982A-12H-4-A 60	108.3	121.79	121.79	4.52435	4.52435	1046	18	6.95273
162-982A-12H-4-A 61	108.31	121.8	121.8	4.52463	4.52463	1100	56	7.00307
162-982A-12H-4-A 63	108.33	121.82	121.82	4.52518	4.52518	1153	58	7.05012
162-982A-12H-4-A 65	108.35	121.84	121.84	4.52573	4.52573	1055	30	6.9613
162-982A-12H-4-A 68.5	108.39	121.88	121.88	4.52683	4.52683	1070	40	6.97541
162-982A-12H-4-A 69.5	108.4	121.89	121.89	4.52711	4.52711	1227	38	7.11233
162-982A-12H-4-A 71.5	108.42	121.91	121.91	4.52766	4.52766	1112	54	7.01392
162-982A-12H-4-A 74	108.44	121.93	121.93	4.52821	4.52821	1058	38	6.96414
162-982A-12H-4-A 75	108.45	121.94	121.94	4.52849	4.52849	1201	69	7.09091
162-982A-12H-4-A 78	108.48	121.97	121.97	4.52931	4.52931	1251	72	7.1317
162-982A-12H-4-A 79	108.49	121.98	121.98	4.52959	4.52959	1242	36	7.12448
162-982A-12H-4-A 81.5	108.52	122.01	122.01	4.53042	4.53042	1195	40	7.0859
162-982A-12H-4-A 84	108.54	122.03	122.03	4.53097	4.53097	1264	34	7.14204
162-982A-12H-4-A 89	108.59	122.08	122.08	4.53235	4.53235	1129	72	7.02909
162-982A-12H-4-A 90	108.6	122.09	122.09	4.53262	4.53262	1287	16	7.16007
162-982A-12H-4-A 92	108.62	122.11	122.11	4.53317	4.53317	1332	57	7.19444
162-982A-12H-4-A 93	108.63	122.12	122.12	4.53345	4.53345	1271	72	7.14756
162-982A-12H-4-A 97	108.67	122.16	122.16	4.53455	4.53455	1175	60	7.06902
162-982A-12H-4-A 98	108.68	122.17	122.17	4.53483	4.53483	1252	66	7.1325
162-982A-12H-4-A 100.5	108.71	122.2	122.2	4.53565	4.53565	1195	59	7.0859
162-982A-12H-4-A 101.5	108.72	122.21	122.21	4.53593	4.53593	1506	75	7.31721
162-982A-12H-4-A 103	108.73	122.22	122.22	4.53621	4.53621	1308	69	7.17625
162-982A-12H-4-A 104	108.74	122.23	122.23	4.53648	4.53648	1323	57	7.18766
162-982A-12H-4-A 105.5	108.76	122.25	122.25	4.53703	4.53703	1251	55	7.1317
162-982A-12H-4-A 108	108.78	122.27	122.27	4.53758	4.53758	1258	55	7.13728
162-982A-12H-4-A 110.5	108.81	122.3	122.3	4.53841	4.53841	1306	58	7.17472
162-982A-12H-4-A 111.5	108.82	122.31	122.31	4.53869	4.53869	1373	66	7.22475
162-982A-12H-4-A 113	108.83	122.32	122.32	4.53896	4.53896	1337	60	7.19818
162-982A-12H-4-A 119	108.89	122.38	122.38	4.54062	4.54062	1427	8	7.26333
162-982A-12H-4-A 120	108.9	122.39	122.39	4.54089	4.54089	1370	44	7.22257
162-982A-12H-4-A 121	108.91	122.4	122.4	4.54117	4.54117	1382	27	7.23129
162-982A-12H-4-A 122	108.92	122.41	122.41	4.54144	4.54144	1382	59	7.23129
162-982A-12H-4-A 124	108.94	122.43	122.43	4.54199	4.54199	1552	7	7.3473
162-982A-12H-4-A 125	108.95	122.44	122.44	4.54227	4.54227	1487	33	7.30452
162-982A-12H-4-A 128	108.98	122.47	122.47	4.5431	4.5431	1451	19	7.28001
162-982A-12H-4-A 131	109.01	122.5	122.5	4.54392	4.54392	1671	53	7.42118
162-982A-12H-4-A 132	109.02	122.51	122.51	4.5442	4.5442	1572	72	7.3601
162-982A-12H-4-A 133	109.03	122.52	122.52	4.54447	4.54447	1733	78	7.45761
162-982A-12H-4-A 136	109.06	122.55	122.55	4.5453	4.5453	1529	40	7.33237
162-982A-12H-4-A 140	109.1	122.59	122.59	4.5464	4.5464	1874	86	7.53583
162-982A-12H-4-A 142	109.12	122.61	122.61	4.54695	4.54695	1909	59	7.55433
162-982A-12H-4-A 143	109.13	122.62	122.62	4.54723	4.54723	1932	57	7.56631
162-982A-12H-5-A 2	109.22	122.71	122.71	4.54971	4.54971	1760	41	7.47307
162-982A-12H-5-A 3	109.23	122.72	122.72	4.54999	4.54999	1785	50	7.48717
162-982A-12H-5-A 6	109.26	122.75	122.75	4.55081	4.55081	1522	55	7.32778
162-982A-12H-5-A 9	109.29	122.78	122.78	4.55164	4.55164	1344	51	7.20341
162-982A-12H-5-A 10	109.3	122.79	122.79	4.55192	4.55192	1461	20	7.28688
162-982A-12H-5-A 11	109.31	122.8	122.8	4.55219	4.55219	1341	41	7.20117
162-982A-12H-5-A 13.5	109.34	122.83	122.83	4.55302	4.55302	1262	58	7.14045
162-982A-12H-5-A 16	109.36	122.85	122.85	4.55357	4.55357	1368	47	7.22111
162-982A-12H-5-A 18	109.38	122.87	122.87	4.55412	4.55412	1493	58	7.30854
162-982A-12H-5-A 20	109.4	122.89	122.89	4.55467	4.55467	1339	68	7.19968
162-982A-12H-5-A 22.5	109.43	122.92	122.92	4.5555	4.5555	1289	36	7.16162
162-982A-12H-5-A 24	109.44	122.93	122.93	4.55577	4.55577	1328	61	7.19143
162-982A-12H-5-A 26	109.46	122.95	122.95	4.55633	4.55633	1392	42	7.2385
162-982A-12H-5-A 27	109.47	122.96	122.96	4.5566	4.5566	1523	49	7.32844
162-982A-12H-5-A 29	109.49	122.98	122.98	4.55715	4.55715	1639	72	7.40184
162-982A-12H-5-A 32	109.52	123.01	123.01	4.55798	4.55798	1270	39	7.14677
162-982A-12H-5-A 34	109.54	123.03	123.03	4.55853	4.55853	1328	53	7.19143
162-982A-12H-5-A 35	109.55	123.04	123.04	4.55881	4.55881	1441	54	7.27309
162-982A-12H-5-A 39	109.59	123.08	123.08	4.55991	4.55991	1367	58	7.22037
162-982A-12H-5-A 40	109.6	123.09	123.09	4.56018	4.56018	1511	52	7.32053
162-982A-12H-5-A 41	109.61	123.1	123.1	4.56046	4.56046	1424	78	7.26123
162-982A-12H-5-A 42	109.62	123.11	123.11	4.56074	4.56074	1486	28	7.30384
162-982A-12H-5-A 43	109.63	123.12	123.12	4.56101	4.56101	1261	36	7.13966
162-982A-12H-5-A 45.5	109.66	123.15	123.15	4.56184	4.56184	1415	96	7.25488
162-982A-12H-5-A 48	109.68	123.17	123.17	4.56239	4.56239	1253	86	7.1333
162-982A-12H-5-A 50	109.7	123.19	123.19	4.56294	4.56294	1459	50	7.28551
162-982A-12H-5-A 53	109.73	123.22	123.22	4.56377	4.56377	1125	58	7.02554
162-982A-12H-5-A 54	109.74	123.23	123.23	4.56404	4.56404	1257	43	7.13648
162-982A-12H-5-A 55	109.75	123.24	123.24	4.56432	4.56432	1523	59	7.32844
162-982A-12H-5-A 58	109.78	123.27	123.27	4.56515	4.56515	1276	39	7.15149
162-982A-12H-5-A 59	109.79	123.28	123.28	4.56542	4.56542	1266	24	7.14362
162-982A-12H-5-A 62	109.82	123.31	123.31	4.56625	4.56625	1486	61	7.30384
162-982A-12H-5-A 65	109.85	123.34	123.34	4.56708	4.56708	1081	27	6.98564
162-982A-12H-5-A 66	109.86	123.35	123.35	4.56735	4.56735	1411	22	7.25205
162-982A-12H-5-A 67	109.87	123.36	123.36	4.56763	4.56763	1063	73	6.96885
162-982A-12H-5-A 70	109.9	123.39	123.39	4.56845	4.56845	1089	45	6.99302
162-982A-12H-5-A 71	109.91	123.4	123.4	4.56873	4.56873	1047	30	6.95368
162-982A-12H-5-A 73	109.93	123.42	123.42	4.56928	4.56928	840	24	6.7334
162-982A-12H-5-A 76	109.96	123.45	123.45	4.57011	4.57011	850	33	6.74524
162-982A-12H-5-A 77	109.97	123.46	123.46	4.57038	4.57038	805	47	6.69084
162-982A-12H-5-A 79	109.99	123.48	123.48	4.57093	4.57093	1151	50	7.04839
162-982A-12H-5-A 82	110.02	123.51	123.51	4.57176	4.57176	1183	53	7.07581
162-982A-12H-5-A 83	110.03	123.52	123.52	4.57204	4.57204	1257	48	7.13648
162-982A-12H-5-A 85.5	110.06	123.55	123.55	4.57286	4.57286	1103	59	7.00579
162-982A-12H-5-A 89	110.09	123.58	123.58	4.57369	4.57369	1194	52	7.08506
162-982A-12H-5-A 90	110.1	123.59	123.59	4.57397	4.57397	1430	17	7.26543
162-982A-12H-5-A 92	110.12	123.61	123.61	4.57452	4.57452	1556	64	7.34987
162-982A-12H-5-A 94.5	110.15	123.64	123.64	4.57534	4.57534	1525	44	7.32975
162-982A-12H-5-A 97	110.17	123.66	123.66	4.5759	4.5759	1639	54	7.40184
162-982A-12H-5-A 98	110.18	123.67	123.67	4.57617	4.57617	1406	71	7.2485
162-982A-12H-5-A 100	110.2	123.69	123.69	4.57672	4.57672	1635	67	7.3994
162-982A-12H-5-A 101	110.21	123.7	123.7	4.577	4.577	1617	47	7.38833
162-982A-12H-5-A 106	110.26	123.75	123.75	4.57838	4.57838	1702	40	7.43956
162-982A-12H-5-A 108	110.28	123.77	123.77	4.57893	4.57893	1881	42	7.53956
162-982A-12H-5-A 109	110.29	123.78	123.78	4.5792	4.5792	1833	52	7.51371
162-982A-12H-5-A 112	110.32	123.81	123.81	4.58003	4.58003	1939	41	7.56993
162-982A-12H-5-A 113	110.33	123.82	123.82	4.58031	4.58031	1904	40	7.55171
162-982A-12H-5-A 116	110.36	123.85	123.85	4.58113	4.58113	2094	11	7.64683
162-982A-12H-5-A 118	110.38	123.87	123.87	4.58168	4.58168	2077	47	7.63868
162-982A-12H-5-A 119	110.39	123.88	123.88	4.58196	4.58196	2121	52	7.65964
162-982A-12H-5-A 123	110.43	123.92	123.92	4.58306	4.58306	2187	44	7.69029
162-982A-12H-5-A 124	110.44	123.93	123.93	4.58334	4.58334	2331	72	7.75405
162-982B-13H-2-A 92	112.42	123.96	123.96	4.58416	4.58416	1594	67	7.374
162-982B-13H-2-A 93	112.43	123.97	123.97	4.58444	4.58444	1407	75	7.24922
162-982B-13H-2-A 96	112.46	124	124	4.58527	4.58527	1494	41	7.30921
162-982B-13H-2-A 98	112.48	124.02	124.02	4.58582	4.58582	1525	78	7.32975
162-982B-13H-2-A 99	112.49	124.03	124.03	4.58609	4.58609	1655	75	7.41156
162-982B-13H-2-A 102	112.52	124.06	124.06	4.58692	4.58692	1767	39	7.47704
162-982B-13H-2-A 103	112.53	124.07	124.07	4.5872	4.5872	1852	44	7.52402
162-982B-13H-2-A 106	112.56	124.1	124.1	4.58802	4.58802	1514	45	7.32251
162-982B-13H-2-A 108	112.58	124.12	124.12	4.58857	4.58857	1474	59	7.29573
162-982B-13H-2-A 109	112.59	124.13	124.13	4.58885	4.58885	1549	78	7.34537
162-982B-13H-2-A 115	112.65	124.19	124.19	4.5905	4.5905	1412	33	7.25276
162-982B-13H-2-A 116	112.66	124.2	124.2	4.59078	4.59078	1513	29	7.32185
162-982B-13H-2-A 118	112.68	124.22	124.22	4.59133	4.59133	1703	38	7.44015
162-982B-13H-2-A 120	112.7	124.24	124.24	4.59188	4.59188	1508	66	7.31854
162-982B-13H-2-A 122	112.72	124.26	124.26	4.59243	4.59243	1433	26	7.26753
162-982B-13H-2-A 125	112.75	124.29	124.29	4.59326	4.59326	1777	54	7.48268
162-982B-13H-2-A 127	112.77	124.31	124.31	4.59381	4.59381	1598	71	7.37651
162-982B-13H-2-A 128	112.78	124.32	124.32	4.59409	4.59409	1496	49	7.31055
162-982B-13H-2-A 130	112.8	124.34	124.34	4.59464	4.59464	1446	49	7.27656
162-982B-13H-2-A 131	112.81	124.35	124.35	4.59491	4.59491	1482	52	7.30115
162-982B-13H-2-A 132	112.82	124.36	124.36	4.59519	4.59519	1360	78	7.21524
162-982B-13H-2-A 133	112.83	124.37	124.37	4.59547	4.59547	1482	55	7.30115
162-982B-13H-2-A 136	112.86	124.4	124.4	4.59629	4.59629	1412	49	7.25276
162-982B-13H-2-A 138	112.88	124.42	124.42	4.59684	4.59684	1466	27	7.29029
162-982B-13H-2-A 139	112.89	124.43	124.43	4.59712	4.59712	1429	50	7.26473
162-982B-13H-2-A 142	112.92	124.46	124.46	4.59795	4.59795	1589	49	7.37086
162-982B-13H-2-A 144	112.94	124.48	124.48	4.5985	4.5985	1464	33	7.28893
162-982B-13H-2-A 147	112.97	124.51	124.51	4.59932	4.59932	1604	44	7.38026
162-982B-13H-2-A 148	112.98	124.52	124.52	4.5996	4.5996	1445	48	7.27586
162-982B-13H-3-A 4	113.04	124.58	124.58	4.60125	4.60125	1704	24	7.44073
162-982B-13H-3-A 6	113.06	124.6	124.6	4.60181	4.60181	1784	77	7.48661
162-982B-13H-3-A 8	113.08	124.62	124.62	4.60236	4.60236	1447	78	7.27725
162-982B-13H-3-A 10	113.1	124.64	124.64	4.60291	4.60291	1499	80	7.31255
162-982B-13H-3-A 13	113.13	124.67	124.67	4.60373	4.60373	1616	75	7.38771
162-982B-13H-3-A 14	113.14	124.68	124.68	4.60401	4.60401	1558	36	7.35116
162-982B-13H-3-A 16	113.16	124.7	124.7	4.60456	4.60456	1384	78	7.23273
162-982B-13H-3-A 18	113.18	124.72	124.72	4.60511	4.60511	1465	38	7.28961
162-982B-13H-3-A 20	113.2	124.74	124.74	4.60566	4.60566	1361	27	7.21597
162-982B-13H-3-A 22	113.22	124.76	124.76	4.60622	4.60622	1365	25	7.21891
162-982B-13H-3-A 25	113.25	124.79	124.79	4.60704	4.60704	1236	65	7.11964
162-982B-13H-3-A 26	113.26	124.8	124.8	4.60732	4.60732	1396	60	7.24137
162-982B-13H-3-A 28	113.28	124.82	124.82	4.60787	4.60787	1406	57	7.2485
162-982B-13H-3-A 29	113.29	124.83	124.83	4.60814	4.60814	1452	48	7.2807
162-982B-13H-3-A 32	113.32	124.86	124.86	4.60897	4.60897	1556	52	7.34987
162-982B-13H-3-A 33	113.33	124.87	124.87	4.60925	4.60925	1303	73	7.17242
162-982B-13H-3-A 36	113.36	124.9	124.9	4.61007	4.61007	1590	99	7.37149
162-982B-13H-3-A 37	113.37	124.91	124.91	4.61035	4.61035	1480	72	7.2998
162-982B-13H-3-A 38.5	113.39	124.93	124.93	4.6109	4.6109	1604	-13	7.38026
162-982B-13H-3-A 43	113.43	124.97	124.97	4.612	4.612	1408	59	7.24993
162-982B-13H-3-A 44	113.44	124.98	124.98	4.61228	4.61228	1602	45	7.37901
162-982B-13H-3-A 46	113.46	125	125	4.61283	4.61283	1577	76	7.36328
162-982B-13H-3-A 48	113.48	125.02	125.02	4.61338	4.61338	1874	69	7.53583
162-982B-13H-3-A 50	113.5	125.04	125.04	4.61393	4.61393	1986	75	7.59388
162-982B-13H-3-A 53	113.53	125.07	125.07	4.61476	4.61476	1599	61	7.37713
162-982B-13H-3-A 57	113.57	125.11	125.11	4.61586	4.61586	1921	24	7.5606
162-982B-13H-3-A 58	113.58	125.12	125.12	4.61614	4.61614	2087	47	7.64348
162-982B-13H-3-A 60	113.6	125.14	125.14	4.61669	4.61669	1978	72	7.58984
162-982B-13H-3-A 62	113.62	125.16	125.16	4.61724	4.61724	2052	38	7.62657
162-982B-13H-3-A 64	113.64	125.18	125.18	4.61779	4.61779	2027	37	7.61431
162-982B-13H-3-A 66.5	113.67	125.21	125.21	4.61862	4.61862	2355	55	7.7643
162-982B-13H-3-A 70	113.7	125.24	125.24	4.61945	4.61945	2203	39	7.69758
162-982B-13H-3-A 71	113.71	125.25	125.25	4.61972	4.61972	2474	52	7.81359
162-982B-13H-3-A 75	113.75	125.29	125.29	4.62082	4.62082	1786	65	7.48773
162-982B-13H-3-A 78	113.78	125.32	125.32	4.62165	4.62165	2493	48	7.82124
162-982B-13H-3-A 83.5	113.84	125.38	125.38	4.6233	4.6233	2337	35	7.75662
162-982B-13H-3-A 86	113.86	125.4	125.4	4.62386	4.62386	2239	72	7.71378
162-982B-13H-3-A 88	113.88	125.42	125.42	4.62441	4.62441	2046	53	7.62364
162-982B-13H-3-A 90	113.9	125.44	125.44	4.62496	4.62496	2111	63	7.65492
162-982B-13H-3-A 91	113.91	125.45	125.45	4.62523	4.62523	2178	87	7.68616
162-982B-13H-3-A 94	113.94	125.48	125.48	4.62606	4.62606	1868	58	7.53262
162-982B-13H-3-A 96	113.96	125.5	125.5	4.62661	4.62661	1857	60	7.52672
162-982B-13H-3-A 99	113.99	125.53	125.53	4.62744	4.62744	1804	80	7.49776
162-982B-13H-3-A 100	114	125.54	125.54	4.62771	4.62771	1970	52	7.58579
162-982B-13H-3-A 102	114.02	125.56	125.56	4.62827	4.62827	1780	73	7.48437
162-982B-13H-3-A 103	114.03	125.57	125.57	4.62854	4.62854	1768	38	7.4776
162-982B-13H-3-A 104	114.04	125.58	125.58	4.62882	4.62882	1713	76	7.446
162-982B-13H-3-A 106	114.06	125.6	125.6	4.62937	4.62937	1902	64	7.55066
162-982B-13H-3-A 107	114.07	125.61	125.61	4.62964	4.62964	1817	19	7.50494
162-982B-13H-3-A 110	114.1	125.64	125.64	4.63047	4.63047	1845	61	7.52023
162-982B-13H-3-A 111	114.11	125.65	125.65	4.63075	4.63075	1860	46	7.52833
162-982B-13H-3-A 114	114.14	125.68	125.68	4.63157	4.63157	1881	33	7.53956
162-982B-13H-3-A 116	114.16	125.7	125.7	4.63212	4.63212	1821	58	7.50714
162-982B-13H-3-A 117	114.17	125.71	125.71	4.6324	4.6324	1617	68	7.38833
162-982B-13H-3-A 118	114.18	125.72	125.72	4.63268	4.63268	1498	59	7.31189
162-982B-13H-3-A 119	114.19	125.73	125.73	4.63295	4.63295	1650	69	7.40853
162-982B-13H-3-A 123.5	114.24	125.78	125.78	4.63433	4.63433	1629	23	7.39572
162-982B-13H-3-A 125.5	114.26	125.8	125.8	4.63488	4.63488	1592	53	7.37275
162-982B-13H-3-A 127.5	114.28	125.82	125.82	4.63543	4.63543	1540	47	7.33954
162-982B-13H-3-A 130	114.3	125.84	125.84	4.63598	4.63598	1539	54	7.33889
162-982B-13H-3-A 132	114.32	125.86	125.86	4.63653	4.63653	1502	10	7.31455
162-982B-13H-3-A 135	114.35	125.89	125.89	4.63736	4.63736	1226	72	7.11151
162-982B-13H-3-A 136	114.36	125.9	125.9	4.63764	4.63764	1343	77	7.20266
162-982B-13H-3-A 138	114.38	125.92	125.92	4.63819	4.63819	1282	46	7.15618
162-982B-13H-3-A 140	114.4	125.94	125.94	4.63874	4.63874	1217	-1	7.10414
162-982B-13H-3-A 141	114.41	125.95	125.95	4.63902	4.63902	1322	40	7.1869
162-982B-13H-3-A 142	114.42	125.96	125.96	4.63929	4.63929	1339	95	7.19968
162-982B-13H-3-A 143	114.43	125.97	125.97	4.63957	4.63957	1107	41	7.00941
162-982B-13H-3-A 146	114.46	126	126	4.64039	4.64039	1881	30	7.53956
162-982B-13H-4-A 1	114.51	126.05	126.05	4.64177	4.64177	1440	66	7.2724
162-982B-13H-4-A 2	114.52	126.06	126.06	4.64205	4.64205	1509	34	7.3192
162-982B-13H-4-A 4	114.54	126.08	126.08	4.6426	4.6426	1444	90	7.27517
162-982B-13H-4-A 6	114.56	126.1	126.1	4.64315	4.64315	1420	53	7.25841
162-982B-13H-4-A 7	114.57	126.11	126.11	4.64343	4.64343	1256	48	7.13569
162-982B-13H-4-A 9	114.59	126.13	126.13	4.64398	4.64398	1300	39	7.17012
162-982B-13H-4-A 14	114.64	126.18	126.18	4.64535	4.64535	1382	9	7.23129
162-982B-13H-4-A 15	114.65	126.19	126.19	4.64563	4.64563	1268	47	7.1452
162-982B-13H-4-A 18	114.68	126.22	126.22	4.64646	4.64646	1234	24	7.11802
162-982B-13H-4-A 20	114.7	126.24	126.24	4.64701	4.64701	1170	43	7.06476
162-982B-13H-4-A 22	114.72	126.26	126.26	4.64756	4.64756	1158	29	7.05445
162-982B-13H-4-A 23	114.73	126.27	126.27	4.64784	4.64784	1359	80	7.2145
162-982B-13H-4-A 26	114.76	126.3	126.3	4.64866	4.64866	1401	37	7.24494
162-982B-13H-4-A 28	114.78	126.32	126.32	4.64921	4.64921	1336	39	7.19744
162-982B-13H-4-A 30	114.8	126.34	126.34	4.64976	4.64976	1229	16	7.11396
162-982B-13H-4-A 31	114.81	126.35	126.35	4.65004	4.65004	1354	98	7.21082
162-982B-13H-4-A 34	114.84	126.38	126.38	4.65087	4.65087	1397	52	7.24208
162-982B-13H-4-A 35.5	114.86	126.4	126.4	4.65142	4.65142	1407	57	7.24922
162-982B-13H-4-A 38	114.88	126.42	126.42	4.65197	4.65197	1567	45	7.35692
162-982B-13H-4-A 40	114.9	126.44	126.44	4.65252	4.65252	1574	34	7.36138
162-982B-13H-4-A 42	114.92	126.46	126.46	4.65307	4.65307	1790	77	7.48997
162-982B-13H-4-A 44	114.94	126.48	126.48	4.65362	4.65362	1445	66	7.27586
162-982B-13H-4-A 46	114.96	126.5	126.5	4.65417	4.65417	1476	39	7.29709
162-982B-13H-4-A 53	115.03	126.57	126.57	4.6561	4.6561	1863	54	7.52994
162-982B-13H-4-A 55	115.05	126.59	126.59	4.65666	4.65666	2074	12	7.63723
162-982B-13H-4-A 58	115.08	126.62	126.62	4.65748	4.65748	1895	82	7.54697
162-982B-13H-4-A 59	115.09	126.63	126.63	4.65776	4.65776	1970	123	7.58579
162-982B-13H-4-A 62	115.12	126.66	126.66	4.65859	4.65859	2434	98	7.79729
162-982B-13H-4-A 63	115.13	126.67	126.67	4.65886	4.65886	2169	12	7.68202
162-982B-13H-4-A 66	115.16	126.7	126.7	4.65969	4.65969	2331	94	7.75405
162-982B-13H-4-A 67	115.17	126.71	126.71	4.65996	4.65996	2601	82	7.86365
162-982B-13H-4-A 69.5	115.2	126.74	126.74	4.66079	4.66079	2661	48	7.88646
162-982B-13H-4-A 71.5	115.22	126.76	126.76	4.66134	4.66134	2428	32	7.79482
162-982B-13H-4-A 74	115.24	126.78	126.78	4.66189	4.66189	2805	82	7.93916
162-982B-13H-4-A 75	115.25	126.79	126.79	4.66217	4.66217	2655	35	7.8842
162-982B-13H-4-A 77.5	115.28	126.82	126.82	4.66299	4.66299	2621	105	7.87131
162-982B-13H-4-A 80	115.3	126.84	126.84	4.66355	4.66355	2696	81	7.89952
162-982B-13H-4-A 82	115.32	126.86	126.86	4.6641	4.6641	2233	53	7.7111
162-982B-13H-4-A 83	115.33	126.87	126.87	4.66437	4.66437	2669	65	7.88946
162-982B-13H-4-A 84	115.34	126.88	126.88	4.66465	4.66465	2491	78	7.82044
162-982B-13H-4-A 86	115.36	126.9	126.9	4.6652	4.6652	2562	100	7.84854
162-982B-13H-4-A 88	115.38	126.92	126.92	4.66575	4.66575	2513	59	7.82923
162-982B-13H-4-A 89	115.39	126.93	126.93	4.66603	4.66603	2445	49	7.8018
162-982B-13H-4-A 93	115.43	126.97	126.97	4.66713	4.66713	2030	85	7.61579
162-982B-13H-4-A 94	115.44	126.98	126.98	4.66741	4.66741	2373	118	7.77191
162-982B-13H-4-A 98	115.48	127.02	127.02	4.66851	4.66851	3331	70	8.11103
162-982B-13H-4-A 102	115.52	127.06	127.06	4.66961	4.66961	4060	156	8.30894
162-982B-13H-4-A 103	115.53	127.07	127.07	4.66989	4.66989	4618	99	8.43772
162-982B-13H-4-A 105.5	115.56	127.1	127.1	4.67071	4.67071	3024	127	8.01434
162-982B-13H-4-A 108	115.58	127.12	127.12	4.67126	4.67126	2147	90	7.67183
162-982B-13H-4-A 110.5	115.61	127.15	127.15	4.67209	4.67209	2044	26	7.62266
162-982B-13H-4-A 111.5	115.62	127.16	127.16	4.67237	4.67237	2602	82	7.86404
162-982B-13H-4-A 114	115.64	127.18	127.18	4.67292	4.67292	1964	61	7.58274
162-982B-13H-4-A 116	115.66	127.2	127.2	4.67347	4.67347	1715	46	7.44717
162-982B-13H-4-A 119	115.69	127.23	127.23	4.6743	4.6743	1708	16	7.44308
162-982B-13H-4-A 120	115.7	127.24	127.24	4.67457	4.67457	1852	28	7.52402
162-982B-13H-4-A 121	115.71	127.25	127.25	4.67485	4.67485	1793	38	7.49165
162-982B-13H-4-A 123	115.73	127.27	127.27	4.6754	4.6754	1629	76	7.39572
162-982B-13H-4-A 125	115.75	127.29	127.29	4.67595	4.67595	1654	50	7.41095
162-982B-13H-4-A 126	115.76	127.3	127.3	4.67623	4.67623	1831	17	7.51262
162-982B-13H-4-A 128	115.78	127.32	127.32	4.67678	4.67678	1499	55	7.31255
162-982B-13H-4-A 129	115.79	127.33	127.33	4.67705	4.67705	1547	59	7.34407
162-982B-13H-4-A 135	115.85	127.39	127.39	4.67871	4.67871	1529	35	7.33237
162-982B-13H-4-A 137	115.87	127.41	127.41	4.67926	4.67926	1725	55	7.45298
162-982B-13H-4-A 138	115.88	127.42	127.42	4.67953	4.67953	1465	65	7.28961
162-982B-13H-4-A 141	115.91	127.45	127.45	4.68036	4.68036	1594	47	7.374
162-982B-13H-4-A 142	115.92	127.46	127.46	4.68064	4.68064	1489	58	7.30586
162-982B-13H-4-A 145	115.95	127.49	127.49	4.68146	4.68146	1348	65	7.20638
162-982B-13H-4-A 146	115.96	127.5	127.5	4.68174	4.68174	1574	21	7.36138
162-982B-13H-5-A 2	116.02	127.56	127.56	4.68339	4.68339	1754	73	7.46965
162-982B-13H-5-A 6	116.06	127.6	127.6	4.68449	4.68449	1480	16	7.2998
162-982B-13H-5-A 9	116.09	127.63	127.63	4.68532	4.68532	1663	22	7.41638
162-982B-13H-5-A 10	116.1	127.64	127.64	4.6856	4.6856	1516	16	7.32383
162-982B-13H-5-A 11	116.11	127.65	127.65	4.68587	4.68587	1598	73	7.37651
162-982B-13H-5-A 16	116.16	127.7	127.7	4.68725	4.68725	1336	38	7.19744
162-982B-13H-5-A 18	116.18	127.72	127.72	4.6878	4.6878	1266	28	7.14362
162-982B-13H-5-A 19	116.19	127.73	127.73	4.68808	4.68808	1500	88	7.31322
162-982B-13H-5-A 26	116.26	127.8	127.8	4.69001	4.69001	1325	40	7.18917
162-982B-13H-5-A 31	116.31	127.85	127.85	4.69138	4.69138	1761	42	7.47364
162-982B-13H-5-A 32	116.32	127.86	127.86	4.69166	4.69166	1578	50	7.36391
162-982B-13H-5-A 37	116.37	127.91	127.91	4.69304	4.69304	1470	42	7.29302
162-982B-13H-5-A 39	116.39	127.93	127.93	4.69359	4.69359	1408	38	7.24993
162-982B-13H-5-A 42	116.42	127.96	127.96	4.69442	4.69442	1376	70	7.22694
162-982B-13H-5-A 44	116.44	127.98	127.98	4.69497	4.69497	1371	49	7.2233
162-982B-13H-5-A 47	116.47	128.01	128.01	4.69579	4.69579	1616	58	7.38771
162-982B-13H-5-A 48	116.48	128.02	128.02	4.69607	4.69607	1662	52	7.41578
162-982B-13H-5-A 51	116.51	128.05	128.05	4.6969	4.6969	1825	56	7.50934
162-982B-13H-5-A 52	116.52	128.06	128.06	4.69717	4.69717	1720	26	7.45008
162-982B-13H-5-A 54	116.54	128.08	128.08	4.69772	4.69772	1590	78	7.37149
162-982B-13H-5-A 56	116.56	128.1	128.1	4.69817	4.69819	1627	72	7.39449
162-982B-13H-5-A 57	116.57	128.11	128.11	4.69834	4.69837	1682	42	7.42774
162-982B-13H-5-A 64	116.64	128.18	128.18	4.69953	4.69968	1667	63	7.41878
162-982B-13H-5-A 65	116.65	128.19	128.19	4.6997	4.69986	1562	47	7.35372
162-982B-13H-5-A 68	116.68	128.22	128.22	4.70021	4.70042	1585	62	7.36834
162-982B-13H-5-A 69	116.69	128.23	128.23	4.70038	4.70061	1620	75	7.39018
162-982B-13H-5-A 73	116.73	128.27	128.27	4.70106	4.70135	1608	75	7.38275
162-982B-13H-5-A 74	116.74	128.28	128.28	4.70123	4.70154	1711	49	7.44483
162-982B-13H-5-A 76	116.76	128.3	128.3	4.70157	4.70191	1569	50	7.35819
162-982B-13H-5-A 81	116.81	128.35	128.35	4.70242	4.70284	1618	54	7.38895
162-982B-13H-5-A 82	116.82	128.36	128.36	4.70259	4.70303	1648	86	7.40732
162-982B-13H-5-A 83	116.83	128.37	128.37	4.70276	4.70321	1596	32	7.37526
162-982B-13H-5-A 86	116.86	128.4	128.4	4.70327	4.70377	1628	34	7.39511
162-982B-13H-5-A 89	116.89	128.43	128.43	4.70378	4.70433	1587	5	7.3696
162-982B-13H-5-A 90	116.9	128.44	128.44	4.70395	4.70452	1508	110	7.31854
162-982B-13H-5-A 93	116.93	128.47	128.47	4.70446	4.70508	1064	58	6.96979
162-982B-13H-5-A 97	116.97	128.51	128.51	4.70514	4.70582	1264	75	7.14204
162-982B-13H-5-A 98	116.98	128.52	128.52	4.70531	4.70601	1326	67	7.18992
162-982B-13H-5-A 104	117.04	128.58	128.58	4.70633	4.70712	1206	34	7.09506
162-982B-13H-5-A 105	117.05	128.59	128.59	4.7065	4.70731	1180	42	7.07327
162-982B-13H-5-A 108	117.08	128.62	128.62	4.70701	4.70787	1280	69	7.15462
162-982B-13H-5-A 109	117.09	128.63	128.63	4.70718	4.70805	1096	50	6.99942
162-982B-13H-5-A 112	117.12	128.66	128.66	4.70769	4.70861	1414	49	7.25418
162-982B-13H-5-A 113	117.13	128.67	128.67	4.70786	4.7088	1434	59	7.26822
162-982B-13H-5-A 117	117.17	128.71	128.71	4.70855	4.70954	1536	46	7.33694
162-982B-13H-5-A 118	117.18	128.72	128.72	4.70871	4.70973	1506	46	7.31721
162-982B-13H-5-A 121	117.21	128.75	128.75	4.70923	4.71029	1473	27	7.29506
162-982B-13H-5-A 122	117.22	128.76	128.76	4.7094	4.71047	1489	52	7.30586
162-982B-13H-5-A 125	117.25	128.79	128.79	4.70991	4.71103	1587	78	7.3696
162-982B-13H-5-A 126	117.26	128.8	128.8	4.71008	4.71122	1443	43	7.27448
162-982B-13H-5-A 128.5	117.29	128.83	128.83	4.71059	4.71178	1529	41	7.33237
162-982B-13H-5-A 129.5	117.3	128.84	128.84	4.71076	4.71196	1325	74	7.18917
162-982B-13H-5-A 132.5	117.33	128.87	128.87	4.71127	4.71252	1462	79	7.28756
162-982B-13H-5-A 133.4	117.33	128.87	128.87	4.71127	4.71252	1118	102	7.0193
162-982B-13H-5-A 136	117.36	128.9	128.9	4.71178	4.71308	1401	29	7.24494
162-982B-13H-5-A 137	117.37	128.91	128.91	4.71195	4.71327	1412	50	7.25276
162-982B-13H-5-A 143.5	117.44	128.98	128.98	4.71314	4.71457	1335	44	7.19669
162-982B-13H-5-A 146	117.46	129	129	4.71348	4.71494	1328	81	7.19143
162-982B-13H-5-A 148	117.48	129.02	129.02	4.71382	4.71532	1428	57	7.26403
162-982B-13H-6-A 2	117.52	129.06	129.06	4.7145	4.71606	1526	45	7.33041
162-982B-13H-6-A 3	117.53	129.07	129.07	4.71467	4.71625	1479	72	7.29912
162-982B-13H-6-A 5.5	117.56	129.1	129.1	4.71518	4.71681	1383	30	7.23201
162-982B-13H-6-A 8	117.58	129.12	129.12	4.71552	4.71718	1428	53	7.26403
162-982B-13H-6-A 11	117.61	129.15	129.15	4.71603	4.71774	1356	18	7.21229
162-982B-13H-6-A 12	117.62	129.16	129.16	4.7162	4.71792	1371	43	7.2233
162-982B-13H-6-A 13	117.63	129.17	129.17	4.71637	4.71811	1538	52	7.33824
162-982B-13H-6-A 16	117.66	129.2	129.2	4.71688	4.71867	1154	14	7.05099
162-982B-13H-6-A 19	117.69	129.23	129.23	4.71739	4.71923	1443	73	7.27448
162-982B-13H-6-A 20	117.7	129.24	129.24	4.71756	4.71941	1376	36	7.22694
162-982B-13H-6-A 24	117.74	129.28	129.28	4.71824	4.72016	1298	42	7.16858
162-982B-13H-6-A 27	117.77	129.31	129.31	4.71875	4.72072	1444	59	7.27517
162-982B-13H-6-A 28	117.78	129.32	129.32	4.71892	4.7209	1726	36	7.45356
162-982B-13H-6-A 29	117.79	129.33	129.33	4.71909	4.72109	1600	40	7.37776
162-982B-13H-6-A 34	117.84	129.38	129.38	4.71994	4.72202	1651	60	7.40914
162-982B-13H-6-A 37	117.87	129.41	129.41	4.72045	4.72258	1626	35	7.39388
162-982B-13H-6-A 38	117.88	129.42	129.42	4.72062	4.72276	1651	43	7.40914
162-982B-13H-6-A 41	117.91	129.45	129.45	4.72113	4.72332	1616	70	7.38771
162-982B-13H-6-A 43	117.93	129.47	129.47	4.72147	4.72369	1664	58	7.41698
162-982B-13H-6-A 44	117.94	129.48	129.48	4.72164	4.72388	1672	53	7.42178
162-982B-13H-6-A 46	117.96	129.5	129.5	4.72198	4.72425	1803	89	7.49721
162-982B-13H-6-A 51	118.01	129.55	129.55	4.72283	4.72518	1901	39	7.55014
162-982B-13H-6-A 52	118.02	129.56	129.56	4.723	4.72537	2150	61	7.67322
162-982B-13H-6-A 53	118.03	129.57	129.57	4.72317	4.72556	2172	92	7.6834
162-982B-13H-6-A 56	118.06	129.6	129.6	4.72368	4.72612	2085	86	7.64252
162-982B-13H-6-A 57	118.07	129.61	129.61	4.72385	4.7263	2239	59	7.71378
162-982B-13H-6-A 61	118.11	129.65	129.65	4.72453	4.72705	2173	61	7.68386
162-982B-13H-6-A 62	118.12	129.66	129.66	4.7247	4.72723	2203	31	7.69758
162-982B-13H-6-A 67	118.17	129.71	129.71	4.72555	4.72816	2257	19	7.72179
162-982B-13H-6-A 68	118.18	129.72	129.72	4.72572	4.72835	2372	46	7.77149
162-982B-13H-6-A 73.5	118.24	129.78	129.78	4.72674	4.72947	2487	60	7.81883
162-982A-13H-2-A 78	114.98	129.9	129.8	4.72708	4.72984	2596	78	7.86173
162-982A-13H-2-A 80	115	129.92	129.82	4.72742	4.73021	2789	38	7.93344
162-982A-13H-2-A 82	115.02	129.94	129.84	4.72776	4.73058	2507	58	7.82684
162-982A-13H-2-A 83	115.03	129.95	129.85	4.72793	4.73077	2540	73	7.83992
162-982A-13H-2-A 84	115.04	129.96	129.86	4.7281	4.73096	2556	68	7.8462
162-982A-13H-2-A 88	115.08	130	129.9	4.72878	4.7317	1913	83	7.55643
162-982A-13H-2-A 91	115.11	130.03	129.93	4.72929	4.73226	1951	43	7.5761
162-982A-13H-2-A 92	115.12	130.04	129.94	4.72946	4.73245	2008	53	7.60489
162-982A-13H-2-A 94	115.14	130.06	129.96	4.7298	4.73282	2141	63	7.66903
162-982A-13H-2-A 98	115.18	130.1	130	4.73048	4.73356	1710	50	7.44425
162-982A-13H-2-A 100	115.2	130.12	130.02	4.73083	4.73394	1888	49	7.54327
162-982A-13H-2-A 102	115.22	130.14	130.04	4.73117	4.73431	1656	41	7.41216
162-982A-13H-2-A 104	115.24	130.16	130.06	4.73151	4.73468	1627	34	7.39449
162-982A-13H-2-A 107	115.27	130.19	130.09	4.73202	4.73524	1850	83	7.52294
162-982A-13H-2-A 109	115.29	130.21	130.11	4.73236	4.73561	1720	99	7.45008
162-982A-13H-2-A 110	115.3	130.22	130.12	4.73253	4.7358	1550	69	7.34601
162-982A-13H-2-A 112	115.32	130.24	130.14	4.73287	4.73617	1644	46	7.40489
162-982A-13H-2-A 114	115.34	130.26	130.16	4.73321	4.73654	1331	24	7.19369
162-982A-13H-2-A 120	115.4	130.32	130.22	4.73423	4.73766	1483	41	7.30182
162-982A-13H-2-A 122	115.42	130.34	130.24	4.73457	4.73803	1564	34	7.355
162-982A-13H-2-A 124	115.44	130.36	130.26	4.73491	4.7384	1649	7	7.40792
162-982A-13H-2-A 126	115.46	130.38	130.28	4.73525	4.73878	1571	37	7.35947
162-982A-13H-2-A 129	115.49	130.41	130.31	4.73576	4.73933	1755	55	7.47022
162-982A-13H-2-A 130	115.5	130.42	130.32	4.73593	4.73952	1414	57	7.25418
162-982A-13H-2-A 132	115.52	130.44	130.34	4.73627	4.73989	1445	12	7.27586
162-982A-13H-2-A 133	115.53	130.45	130.35	4.73644	4.74008	1678	73	7.42536
162-982A-13H-2-A 136	115.56	130.48	130.38	4.73695	4.74064	1540	10	7.33954
162-982A-13H-2-A 138	115.58	130.5	130.4	4.73729	4.74101	1433	59	7.26753
162-982A-13H-2-A 140	115.6	130.52	130.42	4.73763	4.74138	1459	30	7.28551
162-982A-13H-2-A 142	115.62	130.54	130.44	4.73797	4.74176	1236	-3	7.11964
162-982A-13H-2-A 144	115.64	130.56	130.46	4.73831	4.74213	1535	35	7.33629
162-982A-13H-2-A 146	115.66	130.58	130.48	4.73865	4.7425	1601	55	7.37838
162-982A-13H-2-A 148	115.68	130.6	130.5	4.73899	4.74287	1265	50	7.14283
162-982A-13H-3-A 4	115.74	130.66	130.56	4.74001	4.74399	1835	2	7.5148
162-982A-13H-3-A 5	115.75	130.67	130.57	4.74018	4.74418	1475	57	7.29641
162-982A-13H-3-A 7.5	115.78	130.7	130.6	4.74069	4.74473	1131	22	7.03086
162-982A-13H-3-A 10	115.8	130.72	130.62	4.74103	4.74511	1431	57	7.26613
162-982A-13H-3-A 13	115.83	130.75	130.65	4.74154	4.74567	1287	46	7.16007
162-982A-13H-3-A 14	115.84	130.76	130.66	4.74171	4.74585	1406	46	7.2485
162-982A-13H-3-A 16.5	115.87	130.79	130.69	4.74222	4.74641	1421	-7	7.25912
162-982A-13H-3-A 19	115.89	130.81	130.71	4.74256	4.74678	1513	35	7.32185
162-982A-13H-3-A 20	115.9	130.82	130.72	4.74273	4.74697	1350	54	7.20786
162-982A-13H-3-A 23	115.93	130.85	130.75	4.74324	4.74753	1375	74	7.22621
162-982A-13H-3-A 24	115.94	130.86	130.76	4.74341	4.74771	1355	33	7.21156
162-982A-13H-3-A 27	115.97	130.89	130.79	4.74392	4.74827	1403	68	7.24637
162-982A-13H-3-A 28	115.98	130.9	130.8	4.74409	4.74846	1237	77	7.12044
162-982A-13H-3-A 31	116.01	130.93	130.83	4.7446	4.74902	1195	60	7.0859
162-982A-13H-3-A 32	116.02	130.94	130.84	4.74477	4.7492	1378	58	7.22839
162-982A-13H-3-A 34	116.04	130.96	130.86	4.74511	4.74958	1253	40	7.1333
162-982A-13H-3-A 36.5	116.07	130.99	130.89	4.74562	4.75013	1177	53	7.07072
162-982A-13H-3-A 38.5	116.09	131.01	130.91	4.74596	4.75051	1415	58	7.25488
162-982A-13H-3-A 41	116.11	131.03	130.93	4.7463	4.75088	1030	47	6.93731
162-982A-13H-3-A 42	116.12	131.04	130.94	4.74647	4.75106	1366	73	7.21964
162-982A-13H-3-A 44	116.14	131.06	130.96	4.74681	4.75144	1664	5	7.41698
162-982A-13H-3-A 46.5	116.17	131.09	130.99	4.74732	4.752	1449	59	7.27863
162-982A-13H-3-A 48.5	116.19	131.11	131.01	4.74766	4.75237	1237	58	7.12044
162-982A-13H-3-A 51	116.21	131.13	131.03	4.748	4.75274	1497	45	7.31122
162-982A-13H-3-A 52	116.22	131.14	131.04	4.74817	4.75293	1636	46	7.40001
162-982A-13H-3-A 54	116.24	131.16	131.06	4.74851	4.7533	1411	51	7.25205
162-982A-13H-3-A 56	116.26	131.18	131.08	4.74885	4.75367	1622	33	7.39142
162-982A-13H-3-A 58	116.28	131.2	131.1	4.74919	4.75404	1675	52	7.42357
162-982A-13H-3-A 61	116.31	131.23	131.13	4.7497	4.7546	1621	64	7.3908
162-982A-13H-3-A 62	116.32	131.24	131.14	4.74987	4.75479	1756	46	7.47079
162-982A-13H-3-A 64	116.34	131.26	131.16	4.75021	4.75516	1776	52	7.48212
162-982A-13H-3-A 66	116.36	131.28	131.18	4.75055	4.75553	1708	44	7.44308
162-982A-13H-3-A 68.5	116.39	131.31	131.21	4.75106	4.75609	1353	48	7.21008
162-982A-13H-3-A 70.5	116.41	131.33	131.23	4.7514	4.75646	1679	29	7.42595
162-982A-13H-3-A 73	116.43	131.35	131.25	4.75174	4.75684	1567	33	7.35692
162-982A-13H-3-A 74	116.44	131.36	131.26	4.75191	4.75702	1517	55	7.32449
162-982A-13H-3-A 75	116.45	131.37	131.27	4.75209	4.75721	1619	27	7.38956
162-982A-13H-3-A 78	116.48	131.4	131.3	4.7526	4.75777	1545	44	7.34278
162-982A-13H-3-A 80	116.5	131.42	131.32	4.75294	4.75814	1542	43	7.34084
162-982A-13H-3-A 82	116.52	131.44	131.34	4.75328	4.75851	1428	33	7.26403
162-982A-13H-3-A 84	116.54	131.46	131.36	4.75362	4.75888	1512	53	7.32119
162-982A-13H-3-A 86	116.56	131.48	131.38	4.75396	4.75926	1377	45	7.22766
162-982A-13H-3-A 90	116.6	131.52	131.42	4.75464	4.76	1406	40	7.2485
162-982A-13H-3-A 92	116.62	131.54	131.44	4.75498	4.76037	1629	50	7.39572
162-982A-13H-3-A 93	116.63	131.55	131.45	4.75515	4.76056	1522	50	7.32778
162-982A-13H-3-A 96	116.66	131.58	131.48	4.75566	4.76112	1359	53	7.2145
162-982A-13H-3-A 98	116.68	131.6	131.5	4.756	4.76149	1495	50	7.30988
162-982A-13H-3-A 99	116.69	131.61	131.51	4.75617	4.76168	1627	41	7.39449
162-982A-13H-3-A 100	116.7	131.62	131.52	4.75634	4.76186	1700	66	7.43838
162-982A-13H-3-A 102	116.72	131.64	131.54	4.75668	4.76224	1563	44	7.35436
162-982A-13H-3-A 104	116.74	131.66	131.56	4.75702	4.76261	1354	59	7.21082
162-982A-13H-3-A 105	116.75	131.67	131.57	4.75719	4.76279	1331	23	7.19369
162-982A-13H-3-A 109	116.79	131.71	131.61	4.75787	4.76354	1508	28	7.31854
162-982A-13H-3-A 110	116.8	131.72	131.62	4.75804	4.76373	1741	29	7.46221
162-982A-13H-3-A 112	116.82	131.74	131.64	4.75838	4.7641	1799	66	7.49499
162-982A-13H-3-A 114	116.84	131.76	131.66	4.75872	4.76447	1756	63	7.47079
162-982A-13H-3-A 115	116.85	131.77	131.67	4.75889	4.76466	1819	67	7.50604
162-982A-13H-3-A 118	116.88	131.8	131.7	4.7594	4.76522	1628	30	7.39511
162-982A-13H-3-A 120	116.9	131.82	131.72	4.75974	4.76559	1708	39	7.44308
162-982A-13H-3-A 122	116.92	131.84	131.74	4.76008	4.76596	1888	45	7.54327
162-982A-13H-3-A 123	116.93	131.85	131.75	4.76025	4.76615	1699	32	7.4378
162-982A-13H-3-A 126	116.96	131.88	131.78	4.76076	4.76671	1500	50	7.31322
162-982A-13H-3-A 128	116.98	131.9	131.8	4.7611	4.76708	1643	35	7.40428
162-982A-13H-3-A 129	116.99	131.91	131.81	4.76127	4.76726	1770	43	7.47873
162-982A-13H-3-A 132	117.02	131.94	131.84	4.76178	4.76782	1645	41	7.4055
162-982A-13H-3-A 134	117.04	131.96	131.86	4.76212	4.76819	1812	27	7.50219
162-982A-13H-3-A 135	117.05	131.97	131.87	4.76229	4.76838	1816	33	7.50439
162-982A-13H-3-A 139	117.09	132.01	131.91	4.76297	4.76913	1892	42	7.54539
162-982A-13H-3-A 140	117.1	132.02	131.92	4.76314	4.76931	1793	33	7.49165
162-982A-13H-3-A 142	117.12	132.04	131.94	4.76348	4.76968	1675	90	7.42357
162-982A-13H-3-A 143	117.13	132.05	131.95	4.76365	4.76987	1851	27	7.52348
162-982A-13H-3-A 146	117.16	132.08	131.98	4.76416	4.77043	2092	42	7.64588
162-982A-13H-3-A 148.5	117.19	132.11	132.01	4.76467	4.77099	1822	31	7.50769
162-982A-13H-4-A 2	117.22	132.14	132.04	4.76518	4.77155	2308	22	7.74414
162-982A-13H-4-A 4	117.24	132.16	132.06	4.76552	4.77192	2247	45	7.71735
162-982A-13H-4-A 6	117.26	132.18	132.08	4.76586	4.77229	2310	56	7.745
162-982A-13H-4-A 9	117.29	132.21	132.11	4.76637	4.77285	2460	43	7.80792
162-982A-13H-4-A 10	117.3	132.22	132.12	4.76654	4.77304	2331	86	7.75405
162-982A-13H-4-A 12	117.32	132.24	132.14	4.76688	4.77341	2248	36	7.7178
162-982A-13H-4-A 13	117.33	132.25	132.15	4.76705	4.77359	2496	69	7.82244
162-982A-13H-4-A 16	117.36	132.28	132.18	4.76756	4.77415	2236	30	7.71244
162-982A-13H-4-A 19	117.39	132.31	132.21	4.76807	4.77471	2947	42	7.98854
162-982A-13H-4-A 20	117.4	132.32	132.22	4.76824	4.7749	2821	64	7.94485
162-982A-13H-4-A 21	117.41	132.33	132.23	4.76841	4.77508	3094	69	8.03722
162-982A-13H-4-A 23.5	117.44	132.36	132.26	4.76892	4.77564	2831	3	7.94839
162-982A-13H-4-A 26.5	117.47	132.39	132.29	4.76943	4.7762	2666	27	7.88833
162-982A-13H-4-A 28	117.48	132.4	132.3	4.7696	4.77639	2910	92	7.97591
162-982A-13H-4-A 30	117.5	132.42	132.32	4.76994	4.77676	2528	46	7.83518
162-982A-13H-4-A 32	117.52	132.44	132.34	4.77028	4.77713	2495	52	7.82204
162-982A-13H-4-A 33	117.53	132.45	132.35	4.77045	4.77732	2740	20	7.91571
162-982A-13H-4-A 35.5	117.56	132.48	132.38	4.77096	4.77788	2264	8	7.72489
162-982A-13H-4-A 39	117.59	132.51	132.41	4.77147	4.77844	2457	54	7.8067
162-982A-13H-4-A 40	117.6	132.52	132.42	4.77164	4.77862	2250	22	7.71869
162-982A-13H-4-A 42	117.62	132.54	132.44	4.77198	4.77899	2188	38	7.69074
162-982A-13H-4-A 44	117.64	132.56	132.46	4.77232	4.77937	1988	41	7.59488
162-982A-13H-4-A 46	117.66	132.58	132.48	4.77266	4.77974	1712	66	7.44542
162-982A-13H-4-A 48	117.68	132.6	132.5	4.773	4.78011	1761	68	7.47364
162-982A-13H-4-A 49	117.69	132.61	132.51	4.77317	4.7803	1720	31	7.45008
162-982A-13H-4-A 50	117.7	132.62	132.52	4.77334	4.78048	1954	61	7.57763
162-982A-13H-4-A 52	117.72	132.64	132.54	4.77368	4.78086	1765	63	7.47591
162-982A-13H-4-A 54	117.74	132.66	132.56	4.77402	4.78123	1464	78	7.28893
162-982A-13H-4-A 57	117.77	132.69	132.59	4.77454	4.78179	1499	36	7.31255
162-982A-13H-4-A 58	117.78	132.7	132.6	4.77471	4.78197	1725	43	7.45298
162-982A-13H-4-A 60	117.8	132.72	132.62	4.77505	4.78235	1294	36	7.16549
162-982A-13H-4-A 62	117.82	132.74	132.64	4.77539	4.78272	1491	17	7.3072
162-982A-13H-4-A 64	117.84	132.76	132.66	4.77573	4.78309	1484	44	7.3025
162-982A-13H-4-A 65	117.85	132.77	132.67	4.7759	4.78328	1512	59	7.32119
162-982A-13H-4-A 67	117.87	132.79	132.69	4.77624	4.78365	1610	57	7.38399
162-982A-13H-4-A 68	117.88	132.8	132.7	4.77641	4.78383	1612	41	7.38523
162-982A-13H-4-A 69	117.89	132.81	132.71	4.77658	4.78402	1458	32	7.28482
162-982A-13H-4-A 71	117.91	132.83	132.73	4.77692	4.78439	1434	72	7.26822
162-982A-13H-4-A 72	117.92	132.84	132.74	4.77709	4.78458	1471	57	7.2937
162-982A-13H-4-A 73	117.93	132.85	132.75	4.77726	4.78477	1539	43	7.33889
162-982A-13H-4-A 76	117.96	132.88	132.78	4.77777	4.78532	1441	54	7.27309
162-982A-13H-4-A 78	117.98	132.9	132.8	4.77811	4.7857	1302	-7	7.17166
162-982A-13H-4-A 79	117.99	132.91	132.81	4.77828	4.78588	1250	52	7.1309
162-982A-13H-4-A 80	118	132.92	132.82	4.77845	4.78607	1353	50	7.21008
162-982A-13H-4-A 82	118.02	132.94	132.84	4.77879	4.78644	1291	22	7.16317
162-982A-13H-4-A 84	118.04	132.96	132.86	4.77913	4.78681	1485	59	7.30317
162-982A-13H-4-A 87	118.07	132.99	132.89	4.77964	4.78737	1391	10	7.23778
162-982A-13H-4-A 88	118.08	133	132.9	4.77981	4.78756	1343	64	7.20266
162-982A-13H-4-A 90	118.1	133.02	132.92	4.78015	4.78793	1433	50	7.26753
162-982A-13H-4-A 91	118.11	133.03	132.93	4.78032	4.78812	1340	50	7.20042
162-982A-13H-4-A 93.5	118.14	133.06	132.96	4.78083	4.78868	1237	52	7.12044
162-982A-13H-4-A 97	118.17	133.09	132.99	4.78134	4.78923	1396	58	7.24137
162-982A-13H-4-A 99.5	118.2	133.12	133.02	4.78185	4.78979	1397	55	7.24208
162-982A-13H-4-A 100	118.2	133.12	133.02	4.78185	4.78979	1410	13	7.25135
162-982A-13H-4-A 101	118.21	133.13	133.03	4.78202	4.78998	1628	36	7.39511
162-982A-13H-4-A 104	118.24	133.16	133.06	4.78253	4.79054	1529	30	7.33237
162-982A-13H-4-A 106	118.26	133.18	133.08	4.78287	4.79091	1232	49	7.11639
162-982A-13H-4-A 107	118.27	133.19	133.09	4.78304	4.7911	1387	36	7.2349
162-982A-13H-4-A 109	118.29	133.21	133.11	4.78338	4.79147	1549	10	7.34537
162-982A-13H-4-A 110	118.3	133.22	133.12	4.78355	4.79165	1538	83	7.33824
162-982A-13H-4-A 112	118.32	133.24	133.14	4.78389	4.79203	1500	29	7.31322
162-982A-13H-4-A 114	118.34	133.26	133.16	4.78423	4.7924	1317	36	7.18311
162-982A-13H-4-A 116	118.36	133.28	133.18	4.78457	4.79277	1416	34	7.25559
162-982A-13H-4-A 119	118.39	133.31	133.21	4.78508	4.79333	1482	23	7.30115
162-982A-13H-4-A 120	118.4	133.32	133.22	4.78525	4.79352	1519	58	7.32581
162-982A-13H-4-A 122	118.42	133.34	133.24	4.78559	4.79389	1453	65	7.28139
162-982B-14H-1-A 123.5	120.74	133.34	133.24	4.78559	4.79389	1307	66	7.17549
162-982B-14H-1-A 126	120.76	133.36	133.26	4.78593	4.79426	1683	65	7.42833
162-982B-14H-1-A 128	120.78	133.38	133.28	4.78627	4.79463	1787	44	7.48829
162-982B-14H-1-A 130	120.8	133.4	133.3	4.78661	4.79501	1477	52	7.29777
162-982B-14H-1-A 132	120.82	133.42	133.32	4.78695	4.79538	1382	30	7.23129
162-982B-14H-1-A 133	120.83	133.43	133.33	4.78712	4.79556	1191	57	7.08255
162-982B-14H-1-A 136.5	120.87	133.47	133.37	4.7878	4.79631	1832	30	7.51316
162-982B-14H-1-A 139	120.89	133.49	133.39	4.78814	4.79668	1455	22	7.28276
162-982B-14H-1-A 140	120.9	133.5	133.4	4.78831	4.79687	1278	63	7.15305
162-982B-14H-2-A 2	121.02	133.62	133.52	4.79035	4.7991	1431	45	7.26613
162-982B-14H-2-A 3	121.03	133.63	133.53	4.79052	4.79929		48
162-982B-14H-2-A 6	121.06	133.66	133.56	4.79103	4.79985	1147	27	7.04491
162-982B-14H-2-A 8	121.08	133.68	133.58	4.79137	4.80022	1195	47	7.0859
162-982B-14H-2-A 9	121.09	133.69	133.59	4.79154	4.80041	1189	43	7.08087
162-982B-14H-2-A 14	121.14	133.74	133.64	4.79239	4.80134	1369	37	7.22184
162-982B-14H-2-A 17	121.17	133.77	133.67	4.7929	4.8019	1233	25	7.11721
162-982B-14H-2-A 18	121.18	133.78	133.68	4.79307	4.80208	1316	20	7.18235
162-982B-14H-2-A 20	121.2	133.8	133.7	4.79341	4.80245	1416	43	7.25559
162-982B-14H-2-A 22	121.22	133.82	133.72	4.79375	4.80283	1496	20	7.31055
162-982B-14H-2-A 24	121.24	133.84	133.74	4.79409	4.8032	1394	47	7.23993
162-982B-14H-2-A 27	121.27	133.87	133.77	4.7946	4.80376	1365	79	7.21891
162-982B-14H-2-A 28	121.28	133.88	133.78	4.79478	4.80394	1412	44	7.25276
162-982B-14H-2-A 30	121.3	133.9	133.8	4.79511	4.80432	1538	89	7.33824
162-982B-14H-2-A 31	121.31	133.91	133.81	4.79529	4.8045	1393	66	7.23921
162-982B-14H-2-A 34	121.34	133.94	133.84	4.7958	4.80506	1556	53	7.34987
162-982B-14H-2-A 36	121.36	133.96	133.86	4.79614	4.80543	1265	37	7.14283
162-982B-14H-2-A 38	121.38	133.98	133.88	4.79648	4.80581	1393	10	7.23921
162-982B-14H-2-A 41	121.41	134.01	133.91	4.79699	4.80636	1394	36	7.23993
162-982B-14H-2-A 42	121.42	134.02	133.92	4.79716	4.80655	1259	25	7.13807
162-982B-14H-2-A 44	121.44	134.04	133.94	4.7975	4.80692	1385	65	7.23346
162-982B-14H-2-A 45	121.45	134.05	133.95	4.79767	4.80711	1324	77	7.18841
162-982B-14H-2-A 46	121.46	134.06	133.96	4.79784	4.8073	1254	54	7.13409
162-982B-14H-2-A 48	121.48	134.08	133.98	4.79818	4.80767	1377	34	7.22766
162-982B-14H-2-A 49	121.49	134.09	133.99	4.79835	4.80785	1434	44	7.26822
162-982B-14H-2-A 54	121.54	134.14	134.04	4.7992	4.80878	1591	40	7.37212
162-982B-14H-2-A 56	121.56	134.16	134.06	4.79954	4.80916	1387	52	7.2349
162-982B-14H-2-A 58	121.58	134.18	134.08	4.79988	4.80953	1417	56	7.2563
162-982B-14H-2-A 60	121.6	134.2	134.1	4.80022	4.8099	1587	72	7.3696
162-982B-14H-2-A 62	121.62	134.22	134.12	4.80056	4.81027	1592	52	7.37275
162-982B-14H-2-A 65	121.65	134.25	134.15	4.80107	4.81083	1763	68	7.47477
162-982B-14H-2-A 66	121.66	134.26	134.16	4.80124	4.81102	1758	38	7.47193
162-982B-14H-2-A 67	121.67	134.27	134.17	4.80141	4.8112	1446	52	7.27656
162-982B-14H-2-A 70	121.7	134.3	134.2	4.80192	4.81176	1549	73	7.34537
162-982B-14H-2-A 72	121.72	134.32	134.22	4.80226	4.81214	1714	47	7.44659
162-982B-14H-2-A 74	121.74	134.34	134.24	4.8026	4.81251	1658	2	7.41337
162-982B-14H-2-A 77.5	121.78	134.38	134.28	4.80328	4.81325	1786	64	7.48773
162-982B-14H-2-A 80	121.8	134.4	134.3	4.80362	4.81363	1577	58	7.36328
162-982B-14H-2-A 82	121.82	134.42	134.32	4.80396	4.814	1643	42	7.40428
162-982B-14H-2-A 85	121.85	134.45	134.35	4.80447	4.81456	1899	41	7.54908
162-982B-14H-2-A 86	121.86	134.46	134.36	4.80464	4.81474	1508	29	7.31854
162-982B-14H-2-A 88	121.88	134.48	134.38	4.80498	4.81511	1695	8	7.43544
162-982B-14H-2-A 94	121.94	134.54	134.44	4.806	4.81623	1761	13	7.47364
162-982B-14H-2-A 95	121.95	134.55	134.45	4.80617	4.81642	1750	28	7.46737
162-982B-14H-2-A 98	121.98	134.58	134.48	4.80668	4.81698	1897	9	7.54803
162-982B-14H-2-A 99	121.99	134.59	134.49	4.80685	4.81716	1828	42	7.51098
162-982B-14H-2-A 102	122.02	134.62	134.52	4.80736	4.81772	1728	86	7.45472
162-982B-14H-2-A 104	122.04	134.64	134.54	4.8077	4.81809	1660	58	7.41457
162-982B-14H-2-A 105	122.05	134.65	134.55	4.80787	4.81828	1911	62	7.55538
162-982B-14H-2-A 108	122.08	134.68	134.58	4.80838	4.81884	1882	38	7.54009
162-982B-14H-2-A 110	122.1	134.7	134.6	4.80872	4.81921	1763	61	7.47477
162-982B-14H-2-A 112	122.12	134.72	134.62	4.80906	4.81958	1806	72	7.49887
162-982B-14H-2-A 115	122.15	134.75	134.65	4.80957	4.82014	1814	27	7.50329
162-982B-14H-2-A 116	122.16	134.76	134.66	4.80974	4.82033	1692	39	7.43367
162-982B-14H-2-A 118	122.18	134.78	134.68	4.81008	4.8207	1718	72	7.44892
162-982B-14H-2-A 119	122.19	134.79	134.69	4.81025	4.82089	1623	93	7.39203
162-982B-14H-2-A 122	122.22	134.82	134.72	4.81076	4.82145	1568	24	7.35756
162-982B-14H-2-A 124	122.24	134.84	134.74	4.8111	4.82182	1587	32	7.3696
162-982B-14H-2-A 127	122.27	134.87	134.77	4.81161	4.82238	1631	32	7.39695
162-982B-14H-2-A 129	122.29	134.89	134.79	4.81195	4.82275	1459	16	7.28551
162-982B-14H-2-A 133.5	122.34	134.94	134.84	4.8128	4.82368	1699	-22	7.4378
162-982B-14H-2-A 136	122.36	134.96	134.86	4.81314	4.82405	1460	26	7.28619
162-982B-14H-2-A 138	122.38	134.98	134.88	4.81348	4.82442	1452	19	7.2807
162-982B-14H-2-A 139	122.39	134.99	134.89	4.81365	4.82461	1812	82	7.50219
162-982B-14H-2-A 142	122.42	135.02	134.92	4.81416	4.82517	1675	38	7.42357
162-982B-14H-2-A 143	122.43	135.03	134.93	4.81433	4.82536	1520	36	7.32647
162-982B-14H-3-A 3	122.53	135.13	135.03	4.81603	4.82722	1835	76	7.5148
162-982B-14H-3-A 4	122.54	135.14	135.04	4.8162	4.8274	1474	72	7.29573
162-982B-14H-3-A 9	122.59	135.19	135.09	4.81706	4.82833	1378	54	7.22839
162-982B-14H-3-A 10	122.6	135.2	135.1	4.81723	4.82852	1466	41	7.29029
162-982B-14H-3-A 13	122.63	135.23	135.13	4.81774	4.82908	1094	19	6.9976
162-982B-14H-3-A 14	122.64	135.24	135.14	4.81791	4.82927	1343	46	7.20266
162-982B-14H-3-A 15	122.65	135.25	135.15	4.81808	4.82945	1375	94	7.22621
162-982B-14H-3-A 18	122.68	135.28	135.18	4.81859	4.83001	1449	16	7.27863
162-982B-14H-3-A 19	122.69	135.29	135.19	4.81876	4.8302	1245	41	7.12689
162-982B-14H-3-A 24	122.74	135.34	135.24	4.81961	4.83113	1286	10	7.15929
162-982B-14H-3-A 25	122.75	135.35	135.25	4.81978	4.83131	1379	64	7.22911
162-982B-14H-3-A 27	122.77	135.37	135.27	4.82012	4.83169	1320	66	7.18539
162-982B-14H-3-A 30	122.8	135.4	135.3	4.82063	4.83224	1461	55	7.28688
162-982B-14H-3-A 31	122.81	135.41	135.31	4.8208	4.83243	1412	74	7.25276
162-982B-14H-3-A 34	122.84	135.44	135.34	4.82131	4.83299	1475	19	7.29641
162-982B-14H-3-A 37	122.87	135.47	135.37	4.82182	4.83355	1588	61	7.37023
162-982B-14H-3-A 38	122.88	135.48	135.38	4.82199	4.83373	1641	68	7.40306
162-982B-14H-3-A 40	122.9	135.5	135.4	4.82233	4.83411	1881	55	7.53956
162-982B-14H-3-A 43	122.93	135.53	135.43	4.82284	4.83467	1369	58	7.22184
162-982B-14H-3-A 44	122.94	135.54	135.44	4.82301	4.83485	1560	49	7.35244
162-982B-14H-3-A 46	122.96	135.56	135.46	4.82335	4.83522	1676	34	7.42417
162-982B-14H-3-A 47	122.97	135.57	135.47	4.82352	4.83541	1677	50	7.42476
162-982B-14H-3-A 51	123.01	135.61	135.51	4.8242	4.83615	1670	30	7.42058
162-982B-14H-3-A 52	123.02	135.62	135.52	4.82437	4.83634	1851	89	7.52348
162-982B-14H-3-A 55	123.05	135.65	135.55	4.82488	4.8369	1616	41	7.38771
162-982B-14H-3-A 56	123.06	135.66	135.56	4.82505	4.83709	1872	60	7.53476
162-982B-14H-3-A 58	123.08	135.68	135.58	4.82539	4.83746	1648	59	7.40732
162-982B-14H-3-A 63	123.13	135.73	135.63	4.82624	4.83839	1940	66	7.57044
162-982B-14H-3-A 64	123.14	135.74	135.64	4.82641	4.83858	1690	72	7.43248
162-982B-14H-3-A 68.5	123.19	135.79	135.69	4.82726	4.83951	1689	62	7.43189
162-982B-14H-3-A 71	123.21	135.81	135.71	4.8276	4.83988	1474	37	7.29573
162-982B-14H-3-A 72	123.22	135.82	135.72	4.82777	4.84007	1572	66	7.3601
162-982B-14H-3-A 73	123.23	135.83	135.73	4.82794	4.84025	1856	50	7.52618
162-982B-14H-3-A 77.5	123.28	135.88	135.78	4.82879	4.84118	1698	29	7.43721
162-982B-14H-3-A 80	123.3	135.9	135.8	4.82913	4.84155	1624	40	7.39265
162-982B-14H-3-A 81	123.31	135.91	135.81	4.8293	4.84174	1705	52	7.44132
162-982B-14H-3-A 83.5	123.34	135.94	135.84	4.82981	4.8423	1593	42	7.37337
162-982B-14H-3-A 86	123.36	135.96	135.86	4.83015	4.84267	1618	22	7.38895
162-982B-14H-3-A 88	123.38	135.98	135.88	4.83049	4.84304	1601	70	7.37838
162-982B-14H-3-A 89	123.39	135.99	135.89	4.83066	4.84323	1560	51	7.35244
162-982B-14H-3-A 92	123.42	136.02	135.92	4.83117	4.84379	1746	47	7.46508
162-982B-14H-3-A 94	123.44	136.04	135.94	4.83151	4.84416	1660	51	7.41457
162-982B-14H-3-A 97	123.47	136.07	135.97	4.83202	4.84472	1722	36	7.45124
162-982B-14H-3-A 98	123.48	136.08	135.98	4.83219	4.84491	1747	76	7.46566
162-982B-14H-3-A 103	123.53	136.13	136.03	4.83304	4.84584	1931	50	7.56579
162-982B-14H-3-A 104	123.54	136.14	136.04	4.83321	4.84602	1810	55	7.50108
162-982B-14H-3-A 106	123.56	136.16	136.06	4.83355	4.8464	1836	10	7.51534
162-982B-14H-3-A 108	123.58	136.18	136.08	4.83389	4.84677	1705	61	7.44132
162-982B-14H-3-A 109	123.59	136.19	136.09	4.83406	4.84695	1804	33	7.49776
162-982B-14H-3-A 112	123.62	136.22	136.12	4.83457	4.84751	1860	47	7.52833
162-982B-14H-3-A 114.5	123.65	136.25	136.15	4.83508	4.84807	1837	46	7.51589
162-982B-14H-3-A 115.5	123.66	136.26	136.16	4.83525	4.84826	1755	55	7.47022
162-982B-14H-3-A 118	123.68	136.28	136.18	4.83559	4.84863	1820	42	7.50659
162-982B-14H-3-A 120	123.7	136.3	136.2	4.83593	4.849	1549	45	7.34537
162-982B-14H-3-A 123	123.73	136.33	136.23	4.83644	4.84956	1969	22	7.58528
162-982B-14H-3-A 124	123.74	136.34	136.24	4.83661	4.84975	1751	62	7.46794
162-982B-14H-3-A 128	123.78	136.38	136.28	4.83729	4.85049	1835	26	7.5148
162-982B-14H-3-A 130	123.8	136.4	136.3	4.83763	4.85086	1860	30	7.52833
162-982B-14H-3-A 132	123.82	136.42	136.32	4.83798	4.85124	1863	32	7.52994
162-982B-14H-3-A 135	123.85	136.45	136.35	4.83849	4.8518	2060	38	7.63046
162-982B-14H-3-A 136	123.86	136.46	136.36	4.83865	4.85198	2039	78	7.62021
162-982B-14H-3-A 138	123.88	136.48	136.38	4.839	4.85235	1939	44	7.56993
162-982B-14H-3-A 139	123.89	136.49	136.39	4.83917	4.85254	2159	107	7.6774
162-982B-14H-3-A 143	123.93	136.53	136.43	4.83985	4.85328	2089	38	7.64444
162-982B-14H-3-A 144	123.94	136.54	136.44	4.84002	4.85347	2146	82	7.67136
162-982B-14H-3-A 146	123.96	136.56	136.46	4.84036	4.85384	2326	77	7.75191
162-982B-14H-3-A 148	123.98	136.58	136.48	4.8407	4.85422	2017	8	7.60937
162-982B-14H-3-A 149	123.99	136.59	136.49	4.84087	4.8544	2036	56	7.61874
162-982B-14H-4-A 2	124.02	136.62	136.52	4.84138	4.85496	2059	45	7.62998
162-982B-14H-4-A 3	124.03	136.63	136.53	4.84155	4.85515	1900	17	7.54961
162-982B-14H-4-A 7	124.07	136.67	136.57	4.84223	4.85589	2100	32	7.64969
162-982B-14H-4-A 8	124.08	136.68	136.58	4.8424	4.85608	2116	64	7.65728
162-982B-14H-4-A 10	124.1	136.7	136.6	4.84274	4.85645	2065	38	7.63289
162-982B-14H-4-A 11.5	124.12	136.72	136.62	4.84308	4.85682	1882	36	7.54009
162-982B-14H-4-A 14	124.14	136.74	136.64	4.84342	4.85719	2089	77	7.64444
162-982B-14H-4-A 18	124.18	136.78	136.68	4.8441	4.85794	1460	41	7.28619
162-982B-14H-4-A 20	124.2	136.8	136.7	4.84444	4.85831	1962	69	7.58172
162-982B-14H-4-A 21	124.21	136.81	136.71	4.84461	4.8585	1764	40	7.47534
162-982B-14H-4-A 24	124.24	136.84	136.74	4.84512	4.85906	1915	95	7.55747
162-982B-14H-4-A 28	124.28	136.88	136.78	4.8458	4.8598	2092	54	7.64588
162-982B-14H-4-A 35	124.35	136.95	136.85	4.84699	4.8611	1912	28	7.5559
162-982B-14H-4-A 36	124.36	136.96	136.86	4.84716	4.86129	1626	38	7.39388
162-982B-14H-4-A 38	124.38	136.98	136.88	4.8475	4.86166	1439	58	7.2717
162-982B-14H-4-A 40	124.4	137	136.9	4.84784	4.86204	1401	72	7.24494
162-982B-14H-4-A 41	124.41	137.01	136.91	4.84801	4.86222	1583	38	7.36708
162-982B-14H-4-A 42	124.42	137.02	136.92	4.84818	4.86241	1555	68	7.34923
162-982B-14H-4-A 43	124.43	137.03	136.93	4.84835	4.86259	1636	67	7.40001
162-982B-14H-4-A 46	124.46	137.06	136.96	4.84886	4.86315	1515	50	7.32317
162-982B-14H-4-A 50	124.5	137.1	137	4.84954	4.8639	1652	70	7.40974
162-982B-14H-4-A 51	124.51	137.11	137.01	4.84971	4.86408	1486	36	7.30384
162-982B-14H-4-A 52	124.52	137.12	137.02	4.84988	4.86427	1510	52	7.31986
162-982B-14H-4-A 56	124.56	137.16	137.06	4.85056	4.86501	1563	55	7.35436
162-982B-14H-4-A 58	124.58	137.18	137.08	4.8509	4.86539	1182	69	7.07496
162-982B-14H-4-A 61	124.61	137.21	137.11	4.85141	4.86595	1492	51	7.30787
162-982B-14H-4-A 62	124.62	137.22	137.12	4.85158	4.86613	1468	38	7.29166
162-982B-14H-4-A 64	124.64	137.24	137.14	4.85192	4.8665	1469	38	7.29234
162-982B-14H-4-A 65	124.65	137.25	137.15	4.85209	4.86669	1324	39	7.18841
162-982B-14H-4-A 68	124.68	137.28	137.18	4.8526	4.86725	1254	18	7.13409
162-982B-14H-4-A 73	124.73	137.33	137.23	4.85345	4.86818	1538	36	7.33824
162-982B-14H-4-A 74	124.74	137.34	137.24	4.85362	4.86837	1504	77	7.31588
162-982B-14H-4-A 75	124.75	137.35	137.25	4.85379	4.86855	1366	36	7.21964
162-982B-14H-4-A 78	124.78	137.38	137.28	4.8543	4.86911	1760	68	7.47307
162-982B-14H-4-A 81	124.81	137.41	137.31	4.85481	4.86967	1551	43	7.34666
162-982B-14H-4-A 82	124.82	137.42	137.32	4.85498	4.86986	1587	48	7.3696
162-982B-14H-4-A 83.5	124.84	137.44	137.34	4.85532	4.87023	1601	83	7.37838
162-982B-14H-4-A 86	124.86	137.46	137.36	4.85566	4.8706	1826	46	7.50988
162-982B-14H-4-A 88	124.88	137.48	137.38	4.856	4.87097	1653	47	7.41035
162-982B-14H-4-A 91	124.91	137.51	137.41	4.85651	4.87153	1559	47	7.3518
162-982B-14H-4-A 92	124.92	137.52	137.42	4.85668	4.87172	1510	58	7.31986
162-982B-14H-4-A 95	124.95	137.55	137.45	4.85719	4.87228	1487	66	7.30452
162-982B-14H-4-A 96	124.96	137.56	137.46	4.85736	4.87246	1589	73	7.37086
162-982B-14H-4-A 99	124.99	137.59	137.49	4.85787	4.87302	1373	66	7.22475
162-982B-14H-4-A 100	125	137.6	137.5	4.85804	4.87321	1349	65	7.20712
162-982B-14H-4-A 102	125.02	137.62	137.52	4.85838	4.87358	1387	36	7.2349
162-982B-14H-4-A 103	125.03	137.63	137.53	4.85855	4.87377	1429	78	7.26473
162-982B-14H-4-A 105.5	125.06	137.66	137.56	4.85906	4.87432	1558	51	7.35116
162-982B-14H-4-A 108	125.08	137.68	137.58	4.8594	4.8747	1494	50	7.30921
162-982B-14H-4-A 113	125.13	137.73	137.63	4.86026	4.87563	1471	42	7.2937
162-982B-14H-4-A 118	125.18	137.78	137.68	4.86111	4.87636	1455	75	7.28276
162-982B-14H-4-A 119	125.19	137.79	137.69	4.86128	4.87648	1718	39	7.44892
162-982B-14H-4-A 122	125.22	137.82	137.72	4.86179	4.87685	1578	55	7.36391
162-982B-14H-4-A 125	125.25	137.85	137.75	4.8623	4.87721	1541	50	7.34019
162-982B-14H-4-A 126	125.26	137.86	137.76	4.86247	4.87733	1650	72	7.40853
162-982B-14H-4-A 127	125.27	137.87	137.77	4.86264	4.87745	1840	47	7.51752
162-982B-14H-4-A 130	125.3	137.9	137.8	4.86315	4.87782	1960	73	7.5807
162-982B-14H-4-A 132	125.32	137.92	137.82	4.86349	4.87806	1862	78	7.52941
162-982B-14H-4-A 135	125.35	137.95	137.85	4.864	4.87842	1843	72	7.51915
162-982B-14H-4-A 136	125.36	137.96	137.86	4.86417	4.87854	2051	58	7.62608
162-982B-14H-4-A 138.5	125.39	137.99	137.89	4.86468	4.8789	1852	38	7.52402
162-982B-14H-4-A 141	125.41	138.01	137.91	4.86502	4.87915	1847	66	7.52132
162-982B-14H-4-A 142	125.42	138.02	137.92	4.86519	4.87927	1514	52	7.32251
162-982B-14H-4-A 144	125.44	138.04	137.94	4.86553	4.87951	1404	19	7.24708
162-982B-14H-4-A 146	125.46	138.06	137.96	4.86587	4.87975	1235	70	7.11883
162-982B-14H-5-A 4.5	125.55	138.15	138.05	4.8674	4.88084	1641	22	7.40306
162-982B-14H-5-A 6	125.56	138.16	138.06	4.86757	4.88096	1525	66	7.32975
162-982B-14H-5-A 11	125.61	138.21	138.11	4.86842	4.88157	1648	77	7.40732
162-982B-14H-5-A 12	125.62	138.22	138.12	4.86859	4.88169	1627	28	7.39449
162-982B-14H-5-A 13	125.63	138.23	138.13	4.86876	4.88181	1538	73	7.33824
162-982B-14H-5-A 15.5	125.66	138.26	138.16	4.86927	4.88217	1646	76	7.4061
162-982B-14H-5-A 19	125.69	138.29	138.19	4.86978	4.88253	1525	49	7.32975
162-982B-14H-5-A 20	125.7	138.3	138.2	4.86995	4.88266	1389	39	7.23634
162-982B-14H-5-A 22	125.72	138.32	138.22	4.87029	4.8829	1525	30	7.32975
162-982B-14H-5-A 23	125.73	138.33	138.23	4.87046	4.88302	1564	36	7.355
162-982B-14H-5-A 25	125.75	138.35	138.25	4.8708	4.88326	1805	72	7.49832
162-982B-14H-5-A 27	125.77	138.37	138.27	4.87114	4.8835	1566	27	7.35628
162-982B-14H-5-A 30	125.8	138.4	138.3	4.87165	4.88387	1499	36	7.31255
162-982B-14H-5-A 31	125.81	138.41	138.31	4.87182	4.88399	1698	19	7.43721
162-982B-14H-5-A 34	125.84	138.44	138.34	4.87233	4.88435	1386	-1	7.23418
162-982B-14H-5-A 38	125.88	138.48	138.38	4.87301	4.88483	1544	22	7.34213
162-982B-14H-5-A 43	125.93	138.53	138.43	4.87386	4.88544	1582	41	7.36645
162-982B-14H-5-A 44	125.94	138.54	138.44	4.87403	4.88556	1438	99	7.27101
162-982B-14H-5-A 46.5	125.97	138.57	138.47	4.87454	4.88592	1476	22	7.29709
162-982B-14H-5-A 49	125.99	138.59	138.49	4.87488	4.88617	1546	93	7.34343
162-982B-14H-5-A 51	126.01	138.61	138.51	4.87522	4.88641	1488	35	7.30519
162-982B-14H-5-A 52	126.02	138.62	138.52	4.87539	4.88653	1336	59	7.19744
162-982B-14H-5-A 53	126.03	138.63	138.53	4.87556	4.88665	1340	12	7.20042
162-982B-14H-5-A 56	126.06	138.66	138.56	4.87607	4.88701	1303	72	7.17242
162-982B-14H-5-A 58	126.08	138.68	138.58	4.87641	4.88725	1241	14	7.12367
162-982B-14H-5-A 61	126.11	138.71	138.61	4.87692	4.88762	1452	4	7.2807
162-982B-14H-5-A 62	126.12	138.72	138.62	4.87709	4.88774	1686	58	7.43011
162-982B-14H-5-A 64	126.14	138.74	138.64	4.87743	4.88798	1441	62	7.27309
162-982B-14H-5-A 65	126.15	138.75	138.65	4.8776	4.8881	1537	40	7.33759
162-982B-14H-5-A 66	126.16	138.76	138.66	4.87777	4.88822	1625	42	7.39326
162-982B-14H-5-A 68	126.18	138.78	138.68	4.87811	4.88846	1757	40	7.47136
162-982B-14H-5-A 71	126.21	138.81	138.71	4.87862	4.88883	1896	62	7.5475
162-982B-14H-5-A 72	126.22	138.82	138.72	4.87879	4.88895	1982	74	7.59186
162-982B-14H-5-A 73	126.23	138.83	138.73	4.87896	4.88907	1776	58	7.48212
162-982B-14H-5-A 76	126.26	138.86	138.76	4.87947	4.88943	1829	44	7.51152
162-982B-14H-5-A 77	126.27	138.87	138.77	4.87964	4.88955	1738	45	7.46049
162-982B-14H-5-A 79	126.29	138.89	138.79	4.87998	4.8898	2051	15	7.62608
162-982B-14H-5-A 83.5	126.34	138.94	138.84	4.88083	4.8904	2344	58	7.75961
162-982B-14H-5-A 86	126.36	138.96	138.86	4.88118	4.89064	2501	43	7.82445
162-982B-14H-5-A 88.5	126.39	138.99	138.89	4.88169	4.89101	2859	5	7.95823
162-982B-14H-5-A 89.5	126.4	139	138.9	4.88186	4.89113	2275	9	7.72974
162-982B-14H-5-A 92	126.42	139.02	138.92	4.8822	4.89137	2145	42	7.67089
162-982B-14H-5-A 93	126.43	139.03	138.93	4.88237	4.89149	2084	55	7.64204
162-982B-14H-5-A 98	126.48	139.08	138.98	4.88322	4.8921	1964	110	7.58274
162-982B-14H-5-A 100	126.5	139.1	139	4.88356	4.89234	2040	63	7.62071
162-982B-14H-5-A 102	126.52	139.12	139.02	4.8839	4.89258	1978	65	7.58984
162-982B-14H-5-A 104.5	126.55	139.15	139.05	4.88441	4.89294	2039	67	7.62021
162-982B-14H-5-A 106.5	126.57	139.17	139.07	4.88475	4.89318	1914	67	7.55695
162-982B-14H-5-A 108	126.58	139.18	139.08	4.88492	4.89331	1958	58	7.57968
162-982B-14H-5-A 110.5	126.61	139.21	139.11	4.88543	4.89367	2028	38	7.61481
162-982B-14H-5-A 111.5	126.62	139.22	139.12	4.8856	4.89379	1904	67	7.55171
162-982B-14H-5-A 114	126.64	139.24	139.14	4.88594	4.89403	1991	53	7.59639
162-982B-14H-5-A 116	126.66	139.26	139.16	4.88628	4.89427	2023	72	7.61234
162-982B-14H-5-A 119	126.69	139.29	139.19	4.88679	4.89464	1947	50	7.57405
162-982B-14H-5-A 123.5	126.74	139.34	139.24	4.88764	4.89524	2159	1	7.6774
162-982B-14H-5-A 126	126.76	139.36	139.26	4.88798	4.89548	2215	37	7.70301
162-982B-14H-5-A 128	126.78	139.38	139.28	4.88832	4.89573	2392	81	7.77989
162-982B-14H-5-A 129	126.79	139.39	139.29	4.88849	4.89585	2566	74	7.8501
162-982B-14H-5-A 130	126.8	139.4	139.3	4.88866	4.89597	2550	49	7.84385
162-982B-14H-5-A 131	126.81	139.41	139.31	4.88883	4.89609	2903	41	7.9735
162-982B-14H-5-A 133.5	126.84	139.44	139.34	4.88934	4.89645	2652	74	7.88307
162-982B-14H-5-A 136	126.86	139.46	139.36	4.88968	4.89669	3075	42	8.03106
162-982B-14H-5-A 139	126.89	139.49	139.39	4.89019	4.89706	2823	52	7.94556
162-982B-14H-5-A 140	126.9	139.5	139.4	4.89036	4.89718	2772	41	7.92732
162-982B-14H-5-A 143	126.93	139.53	139.43	4.89087	4.89754	3090	47	8.03593
162-982B-14H-5-A 144	126.94	139.54	139.44	4.89104	4.89766	2923	80	7.98037
162-982B-14H-5-A 148	126.98	139.58	139.48	4.89172	4.89815	2900	80	7.97247
162-982B-14H-5-A 149	126.99	139.59	139.49	4.89189	4.89827	3061	59	8.0265
162-982B-14H-6-A 2	127.02	139.62	139.52	4.8924	4.89863	2719	44	7.90802
162-982B-14H-6-A 3	127.03	139.63	139.53	4.89257	4.89875	3126	58	8.04751
162-982B-14H-6-A 5.5	127.06	139.66	139.56	4.89308	4.89911	2790	56	7.9338
162-982B-14H-6-A 8	127.08	139.68	139.58	4.89342	4.89936	2954	60	7.99092
162-982B-14H-6-A 9	127.09	139.69	139.59	4.89359	4.89948	2908	105	7.97522
162-982B-14H-6-A 14	127.14	139.74	139.64	4.89444	4.90008	2798	58	7.93666
162-982B-14H-6-A 15	127.15	139.75	139.65	4.89461	4.9002	2563	73	7.84893
162-982B-14H-6-A 18	127.18	139.78	139.68	4.89512	4.90057	2893	42	7.97005
162-982B-14H-6-A 19	127.19	139.79	139.69	4.89529	4.90069	2735	90	7.91389
162-982B-14H-6-A 22	127.22	139.82	139.72	4.8958	4.90105	2619	78	7.87055
162-982B-14H-6-A 25.5	127.26	139.86	139.76	4.89648	4.90154	2339	22	7.75748
162-982B-14H-6-A 27	127.27	139.87	139.77	4.89665	4.90166	2446	16	7.80221
162-982B-14H-6-A 30	127.3	139.9	139.8	4.89716	4.90202	2612	56	7.86787
162-982B-14H-6-A 32	127.32	139.92	139.82	4.8975	4.90226	2330	46	7.75362
162-982B-14H-6-A 33	127.33	139.93	139.83	4.89767	4.90238	2412	68	7.78821
162-982B-14H-6-A 38	127.38	139.98	139.88	4.89852	4.90299	2271	71	7.72798
162-982B-14H-6-A 39	127.39	139.99	139.89	4.89869	4.90311	2350	61	7.76217
162-982B-14H-6-A 42	127.42	140.02	139.92	4.8992	4.90347	2250	71	7.71869
162-982B-14H-6-A 43	127.43	140.03	139.93	4.89937	4.90359	2431	49	7.79606
162-982B-14H-6-A 45.5	127.46	140.06	139.96	4.89988	4.90396	2242	82	7.71512
162-982B-14H-6-A 48	127.48	140.08	139.98	4.90022	4.9042	2318	56	7.74846
162-982B-14H-6-A 53	127.53	140.13	140.03	4.90107	4.9048	2034	13	7.61776
162-982B-14H-6-A 54	127.54	140.14	140.04	4.90124	4.90492	2284	57	7.73368
162-982B-14H-6-A 55	127.55	140.15	140.05	4.90141	4.90504	2025	39	7.61333
162-982B-14H-6-A 56	127.56	140.16	140.06	4.90158	4.90517	2138	58	7.66763
162-982B-14H-6-A 58	127.58	140.18	140.08	4.90192	4.90541	2167	74	7.6811
162-982B-14H-6-A 60	127.6	140.2	140.1	4.90226	4.90565	1696	30	7.43603
162-982B-14H-6-A 62	127.62	140.22	140.12	4.9026	4.90589	1695	58	7.43544
162-982B-14H-6-A 64	127.64	140.24	140.14	4.90295	4.90613	1787	59	7.48829
162-982B-14H-6-A 67	127.67	140.27	140.17	4.90346	4.9065	1903	59	7.55119
162-982B-14H-6-A 70	127.7	140.3	140.2	4.90397	4.90686	1899	24	7.54908
162-982B-14H-6-A 72.5	127.73	140.33	140.23	4.90448	4.90722	1960	64	7.5807
162-982B-14H-6-A 76	127.76	140.36	140.26	4.90499	4.90759	1434	45	7.26822
162-982B-14H-6-A 78	127.78	140.38	140.28	4.90533	4.90783	1846	41	7.52078
162-982B-14H-6-A 80	127.8	140.4	140.3	4.90567	4.90807	1325	44	7.18917
162-982B-14H-6-A 82	127.82	140.42	140.32	4.90601	4.90831	1377	57	7.22766
162-982B-14H-6-A 84	127.84	140.44	140.34	4.90635	4.90855	1327	5	7.19068
162-982B-14H-6-A 86	127.86	140.46	140.36	4.90669	4.9088	1250	64	7.1309
162-982B-14H-6-A 87	127.87	140.47	140.37	4.90686	4.90892	1439	62	7.2717
162-982B-14H-6-A 89	127.89	140.49	140.39	4.9072	4.90916	1447	74	7.27725
162-982B-14H-6-A 94	127.94	140.54	140.44	4.90805	4.90976	1539	51	7.33889
162-982B-14H-6-A 96	127.96	140.56	140.46	4.90839	4.91001	1433	47	7.26753
162-982B-14H-6-A 98	127.98	140.58	140.48	4.90873	4.91025	1384	77	7.23273
162-982B-14H-6-A 100	128	140.6	140.5	4.90907	4.91049	1325	32	7.18917
162-982B-14H-6-A 102	128.02	140.62	140.52	4.90941	4.91073	1520	22	7.32647
162-982B-14H-6-A 104	128.04	140.64	140.54	4.90975	4.91097	1237	80	7.12044
162-982B-14H-6-A 105	128.05	140.65	140.55	4.90992	4.9111	1484	56	7.3025
162-982B-14H-6-A 107.5	128.08	140.68	140.58	4.91043	4.91146	1851	50	7.52348
162-982B-14H-7-A 2	128.12	140.72	140.62	4.91111	4.91194	1688	55	7.4313
162-982B-14H-7-A 4	128.14	140.74	140.64	4.91145	4.91218	1538	76	7.33824
162-982B-14H-7-A 6	128.16	140.76	140.66	4.91179	4.91243	1852	36	7.52402
162-982B-14H-7-A 8	128.18	140.78	140.68	4.91213	4.91267	1773	61	7.48043
162-982B-14H-7-A 9	128.19	140.79	140.69	4.9123	4.91279	1849	82	7.5224
162-982B-14H-7-A 12	128.22	140.82	140.72	4.91281	4.91315	1587	92	7.3696
162-982B-14H-7-A 14	128.24	140.84	140.74	4.91315	4.91339	1780	106	7.48437
162-982B-14H-7-A 15	128.25	140.85	140.75	4.91332	4.91352	2030	75	7.61579
162-982B-14H-7-A 16	128.26	140.86	140.76	4.91349	4.91364	2059	80	7.62998
162-982B-14H-7-A 18	128.28	140.88	140.78	4.91383	4.91388	2351	92	7.7626
162-982B-14H-7-A 20.5	128.31	140.91	140.81	4.91433	4.9143	2248	159	7.7178
162-982B-14H-7-A 26	128.36	140.96	140.86	4.91517	4.91505	2326	80	7.75191
162-982B-14H-7-A 29	128.39	140.99	140.89	4.91567	4.9155	2197	91	7.69485
162-982B-14H-7-A 30	128.4	141	140.9	4.91584	4.91565	2407	117	7.78614
162-982B-14H-7-A 32	128.42	141.02	140.92	4.91618	4.91596	2377	74	7.77359
162-982C-15H-1-A 74	128.04	141.12	140.96	4.91685	4.91656	2419	133	7.79111
162-982C-15H-1-A 76	128.06	141.14	140.98	4.91718	4.91686	2554	81	7.84542
162-982C-15H-1-A 77	128.07	141.15	140.99	4.91735	4.91701	2684	100	7.89506
162-982C-15H-1-A 80	128.1	141.18	141.02	4.91785	4.91746	2730	126	7.91206
162-982C-15H-1-A 82	128.12	141.2	141.04	4.91819	4.91776	2920	94	7.97934
162-982C-15H-1-A 84	128.14	141.22	141.06	4.91852	4.91806	2965	119	7.99463
162-982C-15H-1-A 86	128.16	141.24	141.08	4.91886	4.91836	2977	111	7.99867
162-982C-15H-1-A 87	128.17	141.25	141.09	4.91902	4.91851	2894	72	7.9704
162-982C-15H-1-A 92	128.22	141.3	141.14	4.91986	4.91926	3370	146	8.12267
162-982C-15H-1-A 94	128.24	141.32	141.16	4.9202	4.91956	3317	144	8.10682
162-982C-15H-1-A 96	128.26	141.34	141.18	4.92053	4.91986	3657	153	8.2044
162-982C-15H-1-A 98	128.28	141.36	141.2	4.92087	4.92017	3501	132	8.1608
162-982C-15H-1-A 100	128.3	141.38	141.22	4.9212	4.92047	3584	106	8.18423
162-982C-15H-1-A 101	128.31	141.39	141.23	4.92137	4.92062	3940	129	8.27894
162-982C-15H-1-A 104	128.34	141.42	141.26	4.92187	4.92107	3811	129	8.24565
162-982C-15H-1-A 106	128.36	141.44	141.28	4.9222	4.92137	4120	139	8.32361
162-982C-15H-1-A 108	128.38	141.46	141.3	4.92254	4.92167	5302	201	8.57584
162-982C-15H-1-A 111	128.41	141.49	141.33	4.92304	4.92212	4887	204	8.49433
162-982C-15H-1-A 112	128.42	141.5	141.34	4.92321	4.92227	5202	209	8.5568
162-982C-15H-1-A 114	128.44	141.52	141.36	4.92354	4.92257	6030	240	8.7045
162-982C-15H-1-A 116	128.46	141.54	141.38	4.92388	4.92287	7019	246	8.85638
162-982C-15H-1-A 117	128.47	141.55	141.39	4.92405	4.92302	7245	321	8.88807
162-982C-15H-1-A 120	128.5	141.58	141.42	4.92455	4.92347	8024	357	8.99019
162-982C-15H-1-A 121	128.51	141.59	141.43	4.92472	4.92362	7187	335	8.88003
162-982C-15H-1-A 124	128.54	141.62	141.46	4.92522	4.92408	10724	462	9.28024
162-982C-15H-1-A 126	128.56	141.64	141.48	4.92555	4.92438	3370	539	8.12267
162-982C-15H-1-A 129	128.59	141.67	141.51	4.92606	4.92483	3370	129	8.12267
162-982C-15H-1-A 130	128.6	141.68	141.52	4.92622	4.92498	3370	129	8.12267
162-982C-15H-1-A 132	128.62	141.7	141.54	4.92656	4.92528	3370	129	8.12267
162-982C-15H-1-A 134	128.64	141.72	141.56	4.92689	4.92558	3370	129	8.12267
162-982C-15H-1-A 136	128.66	141.74	141.58	4.92723	4.92588	3370	129	8.12267
162-982C-15H-1-A 138	128.68	141.76	141.6	4.92756	4.92618	3370	129	8.12267
162-982C-15H-1-A 140	128.7	141.78	141.62	4.9279	4.92648	8017	236	8.98932
162-982C-15H-1-A 141	128.71	141.79	141.63	4.92807	4.92663	4350	146	8.37793
162-982C-15H-1-A 144	128.74	141.82	141.66	4.92857	4.92708	2868	76	7.96137
162-982C-15H-1-A 146	128.76	141.84	141.68	4.9289	4.92738	2465	42	7.80995
162-982C-15H-1-A 148	128.78	141.86	141.7	4.92924	4.92768	4373	234	8.3832
162-982C-15H-2-A 2	128.82	141.9	141.74	4.92991	4.92829	1772	29	7.47986
162-982C-15H-2-A 4	128.84	141.92	141.76	4.93024	4.92859	1177	61	7.07072
162-982C-15H-2-A 6	128.86	141.94	141.78	4.93058	4.92889	3297	175	8.10077
162-982C-15H-2-A 8	128.88	141.96	141.8	4.93091	4.92919	1442	55	7.27379
162-982C-15H-2-A 10	128.9	141.98	141.82	4.93125	4.92949	1203	67	7.09257
162-982C-15H-2-A 12	128.92	142	141.84	4.93158	4.92979	962	-15	6.86901
162-982C-15H-2-A 13	128.93	142.01	141.85	4.93175	4.92994	1298	24	7.16858
162-982C-15H-2-A 16	128.96	142.04	141.88	4.93225	4.93039	1073	58	6.97821
162-982C-15H-2-A 18	128.98	142.06	141.9	4.93259	4.93069	1046	62	6.95273
162-982C-15H-2-A 19	128.99	142.07	141.91	4.93275	4.93084	972	69	6.87936
162-982C-15H-2-A 22	129.02	142.1	141.94	4.93326	4.93129	1142	40	7.04054
162-982C-15H-2-A 23	129.03	142.11	141.95	4.93342	4.93144	1113	60	7.01481
162-982C-15H-2-A 26	129.06	142.14	141.98	4.93393	4.93189	1338	38	7.19893
162-982C-15H-2-A 28	129.08	142.16	142	4.93426	4.9322	1352	43	7.20934
162-982C-15H-2-A 29	129.09	142.17	142.01	4.93443	4.93235	1232	24	7.11639
162-982C-15H-2-A 32	129.12	142.2	142.04	4.93493	4.9328	1282	19	7.15618
162-982C-15H-2-A 34	129.14	142.22	142.06	4.93527	4.9331	1358	44	7.21377
162-982C-15H-2-A 37	129.17	142.25	142.09	4.93577	4.93355	1432	55	7.26683
162-982C-15H-2-A 38	129.18	142.26	142.1	4.93594	4.9337	1538	44	7.33824
162-982C-15H-2-A 40	129.2	142.28	142.12	4.93627	4.934	1464	72	7.28893
162-982C-15H-2-A 41	129.21	142.29	142.13	4.93644	4.93415	1563	68	7.35436
162-982C-15H-2-A 42	129.22	142.3	142.14	4.9366	4.9343	1493	75	7.30854
162-982C-15H-2-A 44	129.24	142.32	142.16	4.93694	4.9346	1511	23	7.32053
162-982C-15H-2-A 46	129.26	142.34	142.18	4.93727	4.9349	1675	51	7.42357
162-982C-15H-2-A 48	129.28	142.36	142.2	4.93761	4.9352	1431	58	7.26613
162-982C-15H-2-A 51	129.31	142.39	142.23	4.93811	4.93565	1480	13	7.2998
162-982C-15H-2-A 52	129.32	142.4	142.24	4.93828	4.9358	1470	51	7.29302
162-982C-15H-2-A 53	129.33	142.41	142.25	4.93845	4.93596	1442	62	7.27379
162-982C-15H-2-A 56	129.36	142.44	142.28	4.93895	4.93641	1548	36	7.34472
162-982C-15H-2-A 58	129.38	142.46	142.3	4.93928	4.93671	1532	59	7.33433
162-982C-15H-2-A 61	129.41	142.49	142.33	4.93979	4.93716	1424	55	7.26123
162-982C-15H-2-A 62	129.42	142.5	142.34	4.93995	4.93731	1584	86	7.36771
162-982C-15H-2-A 64	129.44	142.52	142.36	4.94029	4.93761	1445	48	7.27586
162-982C-15H-2-A 67	129.47	142.55	142.39	4.94079	4.93806	1383	-6	7.23201
162-982C-15H-2-A 68	129.48	142.56	142.4	4.94096	4.93821	1406	59	7.2485
162-982C-15H-2-A 69	129.49	142.57	142.41	4.94113	4.93836	1506	44	7.31721
162-982C-15H-2-A 72	129.52	142.6	142.44	4.94163	4.93881	1578	63	7.36391
162-982C-15H-2-A 74	129.54	142.62	142.46	4.94196	4.93911	1540	39	7.33954
162-982C-15H-2-A 75	129.55	142.63	142.47	4.94213	4.93926	1649	37	7.40792
162-982C-15H-2-A 78	129.58	142.66	142.5	4.94263	4.93971	1450	-8	7.27932
162-982C-15H-2-A 80	129.6	142.68	142.52	4.94297	4.94002	1541	70	7.34019
162-982C-15H-2-A 81	129.61	142.69	142.53	4.94314	4.94017	1448	41	7.27794
162-982C-15H-2-A 83.5	129.64	142.72	142.56	4.94364	4.94062	1578	40	7.36391
162-982C-15H-2-A 86	129.66	142.74	142.58	4.94397	4.94092	1775	78	7.48156
162-982C-15H-2-A 87	129.67	142.75	142.59	4.94414	4.94107	1637	61	7.40062
162-982C-15H-2-A 90	129.7	142.78	142.62	4.94464	4.94152	1684	60	7.42893
162-982C-15H-2-A 92	129.72	142.8	142.64	4.94498	4.94182	1772	62	7.47986
162-982C-15H-2-A 94	129.74	142.82	142.66	4.94531	4.94212	1981	33	7.59136
162-982C-15H-2-A 96	129.76	142.84	142.68	4.94565	4.94242	2101	39	7.65017
162-982C-15H-2-A 98	129.78	142.86	142.7	4.94598	4.94272	2173	22	7.68386
162-982C-15H-2-A 101	129.81	142.89	142.73	4.94648	4.94317	2013	42	7.60738
162-982C-15H-2-A 102	129.82	142.9	142.74	4.94665	4.94332	2225	56	7.70751
162-982C-15H-2-A 104	129.84	142.92	142.76	4.94699	4.94362	2256	55	7.72135
162-982C-15H-2-A 107	129.87	142.95	142.79	4.94749	4.94408	2291	72	7.73674
162-982C-15H-2-A 108	129.88	142.96	142.8	4.94766	4.94423	2478	37	7.81521
162-982C-15H-2-A 110	129.9	142.98	142.82	4.94799	4.94453	2497	68	7.82285
162-982C-15H-2-A 111	129.91	142.99	142.83	4.94816	4.94468	2569	72	7.85127
162-982C-15H-2-A 114	129.94	143.02	142.86	4.94866	4.94513	2694	59	7.89878
162-982C-15H-2-A 116	129.96	143.04	142.88	4.949	4.94543	2850	76	7.95507
162-982C-15H-2-A 118	129.98	143.06	142.9	4.94933	4.94573	2964	71	7.9943
162-982C-15H-2-A 120	130	143.08	142.92	4.94967	4.94603	2794	74	7.93523
162-982C-15H-2-A 122	130.02	143.1	142.94	4.95	4.94633	2855	57	7.95683
162-982C-15H-2-A 123	130.03	143.11	142.95	4.95017	4.94648	2805	55	7.93916
162-982C-15H-2-A 126	130.06	143.14	142.98	4.95067	4.94693	2819	52	7.94414
162-982C-15H-2-A 127	130.07	143.15	142.99	4.95084	4.94708	2791	43	7.93416
162-982C-15H-2-A 130	130.1	143.18	143.02	4.95134	4.94753	2122	30	7.66011
162-982C-15H-2-A 133	130.13	143.21	143.05	4.95184	4.94799	2567	50	7.85049
162-982C-15H-2-A 134	130.14	143.22	143.06	4.95201	4.94814	2425	60	7.79359
162-982C-15H-2-A 136	130.16	143.24	143.08	4.95234	4.94844	2296	55	7.73892
162-982C-15H-2-A 137	130.17	143.25	143.09	4.95251	4.94859	2342	54	7.75876
162-982C-15H-2-A 140	130.2	143.28	143.12	4.95301	4.94904	2213	22	7.7021
162-982C-15H-2-A 142	130.22	143.3	143.14	4.95335	4.94934	2403	76	7.78447
162-982C-15H-2-A 144	130.24	143.32	143.16	4.95368	4.94964	2353	81	7.76345
162-982C-15H-2-A 146	130.26	143.34	143.18	4.95402	4.94994	2170	99	7.68248
162-982C-15H-2-A 148	130.28	143.36	143.2	4.95435	4.95024	2117	46	7.65776
162-982C-15H-3-A 2	130.32	143.4	143.24	4.95502	4.95084	1932	30	7.56631
162-982C-15H-3-A 4	130.34	143.42	143.26	4.95536	4.95114	2075	49	7.63772
162-982C-15H-3-A 6	130.36	143.44	143.28	4.95569	4.95144	2057	68	7.629
162-982C-15H-3-A 9	130.39	143.47	143.31	4.9562	4.95189	1996	44	7.5989
162-982C-15H-3-A 10	130.4	143.48	143.32	4.95636	4.95205	1977	55	7.58934
162-982C-15H-3-A 13	130.43	143.51	143.35	4.95687	4.9525	1753	31	7.46908
162-982C-15H-3-A 14	130.44	143.52	143.36	4.95703	4.95265	1920	61	7.56008
162-982C-15H-3-A 16	130.46	143.54	143.38	4.95737	4.95295	1850	87	7.52294
162-982C-15H-3-A 17	130.47	143.55	143.39	4.95754	4.9531	1881	90	7.53956
162-982C-15H-3-A 20	130.5	143.58	143.42	4.95804	4.95355	2005	65	7.6034
162-982C-15H-3-A 22	130.52	143.6	143.44	4.95837	4.95385	1736	69	7.45934
162-982C-15H-3-A 25	130.55	143.63	143.47	4.95888	4.95435	1493	61	7.30854
162-982B-15H-1-A 80	129.8	143.86	143.5	4.95938	4.95487	1455	40	7.28276
162-982B-15H-1-A 82	129.82	143.88	143.52	4.95971	4.95522	1562	84	7.35372
162-982B-15H-1-A 84	129.84	143.9	143.54	4.96005	4.95557	1402	57	7.24566
162-982B-15H-1-A 86	129.86	143.92	143.56	4.96038	4.95592	1419	22	7.25771
162-982B-15H-1-A 89	129.89	143.95	143.59	4.96088	4.95645	1502	85	7.31455
162-982B-15H-1-A 90	129.9	143.96	143.6	4.96105	4.95662	1398	63	7.2428
162-982B-15H-1-A 92	129.92	143.98	143.62	4.96139	4.95697	1612	66	7.38523
162-982B-15H-1-A 95	129.95	144.01	143.65	4.96189	4.9575	1493	58	7.30854
162-982B-15H-1-A 96	129.96	144.02	143.66	4.96206	4.95767	1519	18	7.32581
162-982B-15H-1-A 98	129.98	144.04	143.68	4.96239	4.95802	1557	32	7.35052
162-982B-15H-1-A 100	130	144.06	143.7	4.96273	4.95837	1876	44	7.5369
162-982B-15H-1-A 102	130.02	144.08	143.72	4.96306	4.95872	1864	55	7.53048
162-982B-15H-1-A 103	130.03	144.09	143.73	4.96323	4.9589	1986	77	7.59388
162-982B-15H-1-A 106	130.06	144.12	143.76	4.96373	4.95942	1759	69	7.4725
162-982B-15H-1-A 108	130.08	144.14	143.78	4.96407	4.95977	2176	102	7.68524
162-982B-15H-1-A 110	130.1	144.16	143.8	4.9644	4.96012	2190	73	7.69166
162-982B-15H-1-A 115	130.15	144.21	143.85	4.96524	4.961	2344	45	7.75961
162-982B-15H-1-A 116	130.16	144.22	143.86	4.96541	4.96117	2451	19	7.80425
162-982B-15H-1-A 118	130.18	144.24	143.88	4.96574	4.96152	2019	38	7.61036
162-982B-15H-1-A 120	130.2	144.26	143.9	4.96607	4.96187	1983	45	7.59237
162-982B-15H-1-A 121	130.21	144.27	143.91	4.96624	4.96205	2115	86	7.65681
162-982B-15H-1-A 122	130.22	144.28	143.92	4.96641	4.96222	2027	24	7.61431
162-982B-15H-1-A 125	130.25	144.31	143.95	4.96691	4.96275	1748	52	7.46623
162-982B-15H-1-A 126	130.26	144.32	143.96	4.96708	4.96292	1809	64	7.50053
162-982B-15H-1-A 129	130.29	144.35	143.99	4.96758	4.96345	1824	78	7.50879
162-982B-15H-1-A 130	130.3	144.36	144	4.96775	4.96362	1782	42	7.48549
162-982B-15H-1-A 132	130.32	144.38	144.02	4.96808	4.96397	1914	12	7.55695
162-982B-15H-1-A 134	130.34	144.4	144.04	4.96842	4.96432	1610	22	7.38399
162-982B-15H-1-A 137	130.37	144.43	144.07	4.96892	4.96485	1629	30	7.39572
162-982B-15H-1-A 138	130.38	144.44	144.08	4.96909	4.96502	1706	35	7.44191
162-982B-15H-1-A 140	130.4	144.46	144.1	4.96942	4.96537	1704	32	7.44073
162-982B-15H-1-A 142	130.42	144.48	144.12	4.96976	4.96572	1688	47	7.4313
162-982B-15H-1-A 143	130.43	144.49	144.13	4.96993	4.9659	1577	20	7.36328
162-982B-15H-1-A 146	130.46	144.52	144.16	4.97043	4.96642	1528	25	7.33172
162-982B-15H-1-A 148	130.48	144.54	144.18	4.97076	4.96677	1172	9	7.06647
162-982B-15H-1-A 149	130.49	144.55	144.19	4.97093	4.96695	1194	50	7.08506
162-982B-15H-2-A 6	130.56	144.62	144.26	4.9721	4.96817	1402	23	7.24566
162-982B-15H-2-A 7	130.57	144.63	144.27	4.97227	4.96835	1272	5	7.14835
162-982B-15H-2-A 9	130.59	144.65	144.29	4.97261	4.9687	1350	82	7.20786
162-982B-15H-2-A 10	130.6	144.66	144.3	4.97277	4.96887	1346	49	7.20489
162-982B-15H-2-A 13	130.63	144.69	144.33	4.97328	4.9694	1547	25	7.34407
162-982B-15H-2-A 14	130.64	144.7	144.34	4.97344	4.96957	1479	20	7.29912
162-982B-15H-2-A 16	130.66	144.72	144.36	4.97378	4.96992	1246	52	7.12769
162-982B-15H-2-A 18	130.68	144.74	144.38	4.97411	4.97027	1479	44	7.29912
162-982B-15H-2-A 20	130.7	144.76	144.4	4.97445	4.97062	1467	52	7.29097
162-982B-15H-2-A 22	130.72	144.78	144.42	4.97478	4.97097	1477	49	7.29777
162-982B-15H-2-A 24	130.74	144.8	144.44	4.97512	4.97132	1570	46	7.35883
162-982B-15H-2-A 25	130.75	144.81	144.45	4.97528	4.9715	1398	88	7.2428
162-982B-15H-2-A 27	130.77	144.83	144.47	4.97562	4.97185	1585	41	7.36834
162-982B-15H-2-A 28	130.78	144.84	144.48	4.97579	4.97202	1508	56	7.31854
162-982B-15H-2-A 29	130.79	144.85	144.49	4.97595	4.9722	1436	65	7.26962
162-982B-15H-2-A 31	130.81	144.87	144.51	4.97629	4.97255	1597	24	7.37588
162-982B-15H-2-A 34	130.84	144.9	144.54	4.97679	4.97307	1499	35	7.31255
162-982B-15H-2-A 37	130.87	144.93	144.57	4.97729	4.9736	1703	38	7.44015
162-982B-15H-2-A 39	130.89	144.95	144.59	4.97763	4.97395	1656	61	7.41216
162-982B-15H-2-A 45	130.95	145.01	144.65	4.97863	4.975	1626	29	7.39388
162-982B-15H-2-A 48	130.98	145.04	144.68	4.97914	4.97555	1698	-6	7.43721
162-982B-15H-2-A 50	131	145.06	144.7	4.97947	4.97592	1637	80	7.40062
162-982B-15H-2-A 51	131.01	145.07	144.71	4.97964	4.97611	1695	30	7.43544
162-982B-15H-2-A 54	131.04	145.1	144.74	4.98014	4.97666	1866	25	7.53155
162-982B-15H-2-A 55	131.05	145.11	144.75	4.98031	4.97685	1695	51	7.43544
162-982B-15H-2-A 58	131.08	145.14	144.78	4.98081	4.9774	1621	41	7.3908
162-982B-15H-2-A 61	131.11	145.17	144.81	4.98131	4.97795	1707	44	7.44249
162-982B-15H-2-A 62	131.12	145.18	144.82	4.98148	4.97814	1579	52	7.36455
162-982B-15H-2-A 63	131.13	145.19	144.83	4.98165	4.97832	1598	31	7.37651
162-982B-15H-2-A 66	131.16	145.22	144.86	4.98215	4.97888	1423	16	7.26052
162-982B-15H-2-A 69	131.19	145.25	144.89	4.98265	4.97943	1423	13	7.26052
162-982B-15H-2-A 70	131.2	145.26	144.9	4.98282	4.97962	1397	39	7.24208
162-982B-15H-2-A 72	131.22	145.28	144.92	4.98315	4.97998	1350	13	7.20786
162-982B-15H-2-A 74	131.24	145.3	144.94	4.98349	4.98035	1443	64	7.27448
162-982B-15H-2-A 76	131.26	145.32	144.96	4.98382	4.98072	1565	22	7.35564
162-982B-15H-2-A 77	131.27	145.33	144.97	4.98399	4.98091	1386	38	7.23418
162-982B-15H-2-A 79.5	131.3	145.36	145	4.98449	4.98146	1305	89	7.17396
162-982B-15H-2-A 84	131.34	145.4	145.04	4.98516	4.9822	1314	64	7.18083
162-982B-15H-2-A 86	131.36	145.42	145.06	4.9855	4.98257	1433	78	7.26753
162-982B-15H-2-A 88	131.38	145.44	145.08	4.98583	4.98294	1275	22	7.1507
162-982B-15H-2-A 90	131.4	145.46	145.1	4.98617	4.98331	1448	52	7.27794
162-982B-15H-2-A 92	131.42	145.48	145.12	4.9865	4.98368	1353	37	7.21008
162-982B-15H-2-A 95	131.45	145.51	145.15	4.98701	4.98423	1502	50	7.31455
162-982B-15H-2-A 96	131.46	145.52	145.16	4.98717	4.98442	1489	4	7.30586
162-982B-15H-2-A 98	131.48	145.54	145.18	4.98751	4.98478	1305	66	7.17396
162-982B-15H-2-A 99	131.49	145.55	145.19	4.98768	4.98497	1286	43	7.15929
162-982B-15H-2-A 101	131.51	145.57	145.21	4.98801	4.98534	1343	47	7.20266
162-982B-15H-2-A 104	131.54	145.6	145.24	4.98851	4.98589	1254	36	7.13409
162-982B-15H-2-A 106	131.56	145.62	145.26	4.98885	4.98626	1284	47	7.15774
162-982B-15H-2-A 109	131.59	145.65	145.29	4.98935	4.98682	1427	58	7.26333
162-982B-15H-2-A 110	131.6	145.66	145.3	4.98952	4.987	1376	59	7.22694
162-982B-15H-2-A 112	131.62	145.68	145.32	4.98985	4.98737	1523	64	7.32844
162-982B-15H-2-A 114	131.64	145.7	145.34	4.99019	4.98774	1265	86	7.14283
162-982B-15H-2-A 117	131.67	145.73	145.37	4.99069	4.98829	1401	38	7.24494
162-982B-15H-2-A 118	131.68	145.74	145.38	4.99086	4.98848	1241	56	7.12367
162-982B-15H-2-A 119	131.69	145.75	145.39	4.99102	4.98866	1255	45	7.13489
162-982B-15H-2-A 124	131.74	145.8	145.44	4.99186	4.98958	1070	58	6.97541
162-982B-15H-2-A 126	131.76	145.82	145.46	4.9922	4.98995	1089	62	6.99302
162-982B-15H-2-A 128	131.78	145.84	145.48	4.99253	4.99032	1134	38	7.03351
162-982B-15H-2-A 130	131.8	145.86	145.5	4.99287	4.99069	1295	66	7.16627
162-982B-15H-2-A 131	131.81	145.87	145.51	4.99303	4.99088	1078	58	6.98286
162-982B-15H-2-A 132	131.82	145.88	145.52	4.9932	4.99106	1100	34	7.00307
162-982B-15H-2-A 135	131.85	145.91	145.55	4.9937	4.99162	1148	-3	7.04578
162-982B-15H-2-A 136	131.86	145.92	145.56	4.99387	4.9918	1211	45	7.0992
162-982B-15H-2-A 138	131.88	145.94	145.58	4.99421	4.99217	1184	47	7.07665
162-982B-15H-2-A 139	131.89	145.95	145.59	4.99437	4.99235	1315	36	7.18159
162-982B-15H-2-A 141	131.91	145.97	145.61	4.99471	4.99272	1219	16	7.10579
162-982B-15H-2-A 142	131.92	145.98	145.62	4.99488	4.99291	1177	24	7.07072
162-982B-15H-2-A 144	131.94	146	145.64	4.99521	4.99328	1160	44	7.05618
162-982B-15H-2-A 146	131.96	146.02	145.66	4.99555	4.99365	1117	44	7.0184
162-982B-15H-2-A 148	131.98	146.04	145.68	4.99588	4.99402	1129	61	7.02909
162-982B-15H-2-A 150	132	146.06	145.7	4.99622	4.99438	1177	39	7.07072
162-982B-15H-3-A 2	132.02	146.08	145.72	4.99655	4.99475	1307	30	7.17549
162-982B-15H-3-A 5	132.05	146.11	145.75	4.99705	4.99531	1206	81	7.09506
162-982B-15H-3-A 6	132.06	146.12	145.76	4.99722	4.99549	1227	40	7.11233
162-982B-15H-3-A 7	132.07	146.13	145.77	4.99739	4.99568	997	59	6.90475
162-982B-15H-3-A 13	132.13	146.19	145.83	4.99839	4.99678	1267	39	7.14441
162-982B-15H-3-A 15	132.15	146.21	145.85	4.99873	4.99715	1138	50	7.03703
162-982B-15H-3-A 16	132.16	146.22	145.86	4.99889	4.99734	1310	60	7.17778
162-982B-15H-3-A 18	132.18	146.24	145.88	4.99923	4.99771	1136	85	7.03527
162-982B-15H-3-A 21	132.21	146.27	145.91	4.99973	4.99826	1382	47	7.23129
162-982B-15H-3-A 22	132.22	146.28	145.92	4.9999	4.99845	1289	47	7.16162
162-982B-15H-3-A 23	132.23	146.29	145.93	5.00007	4.99863	1170	47	7.06476
162-982B-15H-3-A 26	132.26	146.32	145.96	5.00057	4.99914	1396	49	7.24137
162-982B-15H-3-A 29	132.29	146.35	145.99	5.00107	4.99955	1064	20	6.96979
162-982B-15H-3-A 30	132.3	146.36	146	5.00124	4.99969	1324	52	7.18841
162-982B-15H-3-A 32	132.32	146.38	146.02	5.00157	4.99996	1427	60	7.26333
162-982B-15H-3-A 33	132.33	146.39	146.03	5.00174	5.0001	1341	37	7.20117
162-982B-15H-3-A 35.5	132.36	146.42	146.06	5.00224	5.00051	1375	43	7.22621
162-982B-15H-3-A 39	132.39	146.45	146.09	5.00275	5.00092	1392	30	7.2385
162-982B-15H-3-A 40	132.4	146.46	146.1	5.00291	5.00106	1345	41	7.20415
162-982B-15H-3-A 42	132.42	146.48	146.12	5.00325	5.00133	1417	38	7.2563
162-982B-15H-3-A 44.5	132.45	146.51	146.15	5.00375	5.00174	1294	37	7.16549
162-982B-15H-3-A 46.5	132.47	146.53	146.17	5.00409	5.00201	1409	55	7.25064
162-982B-15H-3-A 48	132.48	146.54	146.18	5.00425	5.00215	1308	72	7.17625
162-982B-15H-3-A 49	132.49	146.55	146.19	5.00442	5.00229	1499	74	7.31255
162-982B-15H-3-A 55	132.55	146.61	146.25	5.00542	5.00311	1569	66	7.35819
162-982B-15H-3-A 56	132.56	146.62	146.26	5.00559	5.00325	1520	41	7.32647
162-982B-15H-3-A 58	132.58	146.64	146.28	5.00593	5.00352	1491	56	7.3072
162-982B-15H-3-A 61	132.61	146.67	146.31	5.00643	5.00393	1531	110	7.33368
162-982B-15H-3-A 62	132.62	146.68	146.32	5.0066	5.00407	1555	78	7.34923
162-982B-15H-3-A 65	132.65	146.71	146.35	5.0071	5.00448	1681	31	7.42714
162-982B-15H-3-A 66	132.66	146.72	146.36	5.00727	5.00462	1660	76	7.41457
162-982B-15H-3-A 67	132.67	146.73	146.37	5.00743	5.00476	1716	66	7.44775
162-982B-15H-3-A 72	132.72	146.78	146.42	5.00827	5.00544	1430	72	7.26543
162-982B-15H-3-A 74	132.74	146.8	146.44	5.00861	5.00571	1376	37	7.22694
162-982B-15H-3-A 77	132.77	146.83	146.47	5.00911	5.00613	1483	36	7.30182
162-982B-15H-3-A 78	132.78	146.84	146.48	5.00928	5.00626	1537	89	7.33759
162-982B-15H-3-A 79	132.79	146.85	146.49	5.00944	5.0064	1521	41	7.32712
162-982B-15H-3-A 82	132.82	146.88	146.52	5.00995	5.00681	1580	63	7.36518
162-982B-15H-3-A 83	132.83	146.89	146.53	5.01011	5.00695	1492	44	7.30787
162-982B-15H-3-A 86	132.86	146.92	146.56	5.01062	5.00736	1499	64	7.31255
162-982B-15H-3-A 87	132.87	146.93	146.57	5.01078	5.0075	1529	64	7.33237
162-982B-15H-3-A 89	132.89	146.95	146.59	5.01112	5.00777	1582	47	7.36645
162-982B-15H-3-A 94	132.94	147	146.64	5.01196	5.00846	1692	86	7.43367
162-982B-15H-3-A 97	132.97	147.03	146.67	5.01246	5.00887	1443	80	7.27448
162-982B-15H-3-A 98	132.98	147.04	146.68	5.01262	5.009	1802	36	7.49665
162-982B-15H-3-A 100	133	147.06	146.7	5.01296	5.00928	1831	89	7.51262
162-982B-15H-3-A 102	133.02	147.08	146.72	5.01329	5.00955	2085	86	7.64252
162-982B-15H-3-A 103	133.03	147.09	146.73	5.01346	5.00969	2002	70	7.6019
162-982B-15H-3-A 106	133.06	147.12	146.76	5.01396	5.0101	2638	103	7.87778
162-982B-15H-3-A 109	133.09	147.15	146.79	5.01447	5.01051	3210	118	8.07403
162-982B-15H-3-A 110	133.1	147.16	146.8	5.01463	5.01065	3297	101	8.10077
162-982B-15H-3-A 112	133.12	147.18	146.82	5.01497	5.01092	3896	172	8.26771
162-982B-15H-3-A 114	133.14	147.2	146.84	5.0153	5.0112	4350	116	8.37793
162-982B-15H-3-A 117	133.17	147.23	146.87	5.01581	5.01161	5403	210	8.59471
162-982B-15H-3-A 118	133.18	147.24	146.88	5.01597	5.01174	5522	190	8.6165
162-982B-15H-3-A 119	133.19	147.25	146.89	5.01614	5.01188	4793	201	8.47491
162-982B-15H-3-A 122	133.22	147.28	146.92	5.01664	5.01229	6557	70	8.78829
162-982B-15H-3-A 123	133.23	147.29	146.93	5.01681	5.01243	2026	72	7.61382
162-982B-15H-3-A 124	133.24	147.3	146.94	5.01698	5.01257	2038	70	7.61972
162-982B-15H-3-A 126	133.26	147.32	146.96	5.01731	5.01284	2038	72	7.61972
162-982B-15H-3-A 127	133.27	147.33	146.97	5.01748	5.01298	2038	72	7.61972
162-982B-15H-3-A 128	133.28	147.34	146.98	5.01765	5.01311	2038	70	7.61972
162-982B-15H-3-A 129	133.29	147.35	146.99	5.01782	5.01325	2038	70	7.61972
162-982B-15H-3-A 134	133.34	147.4	147.04	5.01865	5.01394	2591	55	7.8598
162-982B-15H-3-A 135	133.35	147.41	147.05	5.01882	5.01407	2145	79	7.67089
162-982B-15H-3-A 138	133.38	147.44	147.08	5.01932	5.01449	2191	55	7.69211
162-982B-15H-3-A 139	133.39	147.45	147.09	5.01949	5.01462	2089	-15	7.64444
162-982B-15H-3-A 142	133.42	147.48	147.12	5.01999	5.01503	1987	52	7.59438
162-982B-15H-3-A 144	133.44	147.5	147.14	5.02033	5.01531	1871	58	7.53423
162-982B-15H-3-A 146	133.46	147.52	147.16	5.02066	5.01558	1946	30	7.57353
162-982B-15H-3-A 148	133.48	147.54	147.18	5.021	5.01586	1866	63	7.53155
162-982B-15H-4-A 2	133.52	147.58	147.22	5.02167	5.0164	2206	78	7.69894
162-982B-15H-4-A 4	133.54	147.6	147.24	5.022	5.01668	2026	55	7.61382
162-982B-15H-4-A 7	133.57	147.63	147.27	5.0225	5.01709	2038	55	7.61972
162-982B-15H-4-A 8	133.58	147.64	147.28	5.02267	5.01723	1925	57	7.56268
162-982B-15H-4-A 10	133.6	147.66	147.3	5.02301	5.0175	1932	63	7.56631
162-982B-15H-4-A 12	133.62	147.68	147.32	5.02334	5.01777	1792	35	7.49109
162-982B-15H-4-A 13	133.63	147.69	147.33	5.02351	5.01791	2008	28	7.60489
162-982B-15H-4-A 15	133.65	147.71	147.35	5.02384	5.01819	2247	77	7.71735
162-982B-15H-4-A 18	133.68	147.74	147.38	5.02435	5.0186	2345	49	7.76004
162-982B-15H-4-A 27	133.77	147.83	147.47	5.02585	5.01983	2067	73	7.63385
162-982B-15H-4-A 28	133.78	147.84	147.48	5.02602	5.01997	1980	44	7.59085
162-982B-15H-4-A 30	133.8	147.86	147.5	5.02636	5.02024	1996	72	7.5989
162-982B-15H-4-A 32	133.82	147.88	147.52	5.02669	5.02051	2048	52	7.62462
162-982B-15H-4-A 33	133.83	147.89	147.53	5.02686	5.02065	1964	74	7.58274
162-982B-15H-4-A 35.5	133.86	147.92	147.56	5.02736	5.02106	1669	46	7.41998
162-982B-15H-4-A 39	133.89	147.95	147.59	5.02786	5.02147	1768	7	7.4776
162-982B-15H-4-A 40	133.9	147.96	147.6	5.02803	5.02161	1572	56	7.3601
162-982B-15H-4-A 41	133.91	147.97	147.61	5.0282	5.02175	1448	47	7.27794
162-982B-15H-4-A 44	133.94	148	147.64	5.0287	5.02216	1271	53	7.14756
162-982B-15H-4-A 45	133.95	148.01	147.65	5.02887	5.0223	1332	47	7.19444
162-982B-15H-4-A 48	133.98	148.04	147.68	5.02937	5.02271	1555	67	7.34923
162-982B-15H-4-A 50	134	148.06	147.7	5.0297	5.02298	1479	50	7.29912
162-982B-15H-4-A 52	134.02	148.08	147.72	5.03004	5.02326	1308	27	7.17625
162-982B-15H-4-A 55	134.05	148.11	147.75	5.03054	5.02367	1322	38	7.1869
162-982B-15H-4-A 58	134.08	148.14	147.78	5.03104	5.02408	1431	54	7.26613
162-982B-15H-4-A 63	134.13	148.19	147.83	5.03188	5.02476	1430	31	7.26543
162-982B-15H-4-A 65	134.15	148.21	147.85	5.03222	5.02504	1360	39	7.21524
162-982B-15H-4-A 68	134.18	148.24	147.88	5.03272	5.02545	1522	52	7.32778
162-982B-15H-4-A 70	134.2	148.26	147.9	5.03305	5.02572	1544	58	7.34213
162-982B-15H-4-A 72	134.22	148.28	147.92	5.03339	5.026	1262	76	7.14045
162-982B-15H-4-A 75	134.25	148.31	147.95	5.03389	5.02641	1395	86	7.24065
162-982B-15H-4-A 77	134.27	148.33	147.97	5.03422	5.02668	1396	52	7.24137
162-982B-15H-4-A 79	134.29	148.35	147.99	5.03456	5.02696	1389	37	7.23634
162-982B-15H-4-A 80	134.3	148.36	148	5.03473	5.02709	1389	50	7.23634
162-982B-15H-4-A 81	134.31	148.37	148.01	5.03489	5.02723	1576	59	7.36265
162-982B-15H-4-A 84	134.34	148.4	148.04	5.0354	5.02764	1503	33	7.31522
162-982B-15H-4-A 85	134.35	148.41	148.05	5.03556	5.02778	1394	84	7.23993
162-982B-15H-4-A 88	134.38	148.44	148.08	5.03607	5.02819	1478	36	7.29845
162-982B-15H-4-A 90	134.4	148.46	148.1	5.0364	5.02846	1706	71	7.44191
162-982B-15H-4-A 92	134.42	148.48	148.12	5.03674	5.02874	1461	64	7.28688
162-982B-15H-4-A 93	134.43	148.49	148.13	5.0369	5.02887	1236	59	7.11964
162-982B-15H-4-A 96	134.46	148.52	148.16	5.03741	5.02929	1402	64	7.24566
162-982B-15H-4-A 97	134.47	148.53	148.17	5.03757	5.02942	1619	36	7.38956
162-982B-15H-4-A 104	134.54	148.6	148.24	5.03875	5.03038	1304	50	7.17319
162-982B-15H-4-A 105	134.55	148.61	148.25	5.03891	5.03052	1319	58	7.18463
162-982B-15H-4-A 108	134.58	148.64	148.28	5.03942	5.03093	1453	44	7.28139
162-982B-15H-4-A 110	134.6	148.66	148.3	5.03975	5.0312	1337	46	7.19818
162-982B-15H-4-A 111	134.61	148.67	148.31	5.03992	5.03134	1245	28	7.12689
162-982B-15H-4-A 115	134.65	148.71	148.35	5.04059	5.03189	1489	83	7.30586
162-982B-15H-4-A 116	134.66	148.72	148.36	5.04076	5.03203	1560	72	7.35244
162-982B-15H-4-A 118	134.68	148.74	148.38	5.04109	5.0323	1333	40	7.19519
162-982B-15H-4-A 120	134.7	148.76	148.4	5.04143	5.03257	1246	55	7.12769
162-982B-15H-4-A 123	134.73	148.79	148.43	5.04193	5.03299	1411	58	7.25205
162-982B-15H-4-A 124	134.74	148.8	148.44	5.0421	5.03312	1286	76	7.15929
162-982B-15H-4-A 127	134.77	148.83	148.47	5.0426	5.03353	1354	61	7.21082
162-982B-15H-4-A 128	134.78	148.84	148.48	5.04276	5.03367	1335	53	7.19669
162-982B-15H-4-A 130	134.8	148.86	148.5	5.0431	5.03394	1294	61	7.16549
162-982B-15H-4-A 132	134.82	148.88	148.52	5.04343	5.03422	1259	39	7.13807
162-982B-15H-4-A 133	134.83	148.89	148.53	5.0436	5.03436	1420	29	7.25841
162-982B-15H-4-A 136	134.86	148.92	148.56	5.0441	5.03477	1482	58	7.30115
162-982B-15H-4-A 138	134.88	148.94	148.58	5.04444	5.03504	1281	38	7.1554
162-982B-15H-4-A 143	134.93	148.99	148.63	5.04528	5.03573	1345	24	7.20415
162-982B-15H-4-A 144	134.94	149	148.64	5.04544	5.03586	1403	24	7.24637
162-982B-15H-4-A 146	134.96	149.02	148.66	5.04578	5.03613	1459	32	7.28551
162-982B-15H-4-A 148	134.98	149.04	148.68	5.04611	5.03639	1512	36	7.32119
162-982B-15H-4-A 149	134.99	149.05	148.69	5.04628	5.03652	1320	53	7.18539
162-982B-15H-5-A 2	135.02	149.08	148.72	5.04678	5.03691	1489	30	7.30586
162-982B-15H-5-A 3	135.03	149.09	148.73	5.04695	5.03704	1534	44	7.33563
162-982B-15H-5-A 9	135.09	149.15	148.79	5.04796	5.03782	1377	22	7.22766
162-982B-15H-5-A 10	135.1	149.16	148.8	5.04812	5.03795	1411	26	7.25205
162-982B-15H-5-A 13	135.13	149.19	148.83	5.04863	5.03834	1541	66	7.34019
162-982B-15H-5-A 14	135.14	149.2	148.84	5.04879	5.03847	1206	54	7.09506
162-982B-15H-5-A 19	135.19	149.25	148.89	5.04963	5.03911	1590	27	7.37149
162-982B-15H-5-A 20	135.2	149.26	148.9	5.0498	5.03924	1670	48	7.42058
162-982B-15H-5-A 21	135.21	149.27	148.91	5.04996	5.03937	1504	44	7.31588
162-982B-15H-5-A 24	135.24	149.3	148.94	5.05047	5.03976	1225	13	7.1107
162-982B-15H-5-A 28	135.28	149.34	148.98	5.05114	5.04028	1056	51	6.96224
162-982B-15H-5-A 31	135.31	149.37	149.01	5.05164	5.04067	1186	19	7.07834
162-982B-15H-5-A 33	135.33	149.39	149.03	5.05197	5.04093	1384	51	7.23273
162-982B-15H-5-A 37	135.37	149.43	149.07	5.05264	5.04145	1504	31	7.31588
162-982B-15H-5-A 38	135.38	149.44	149.08	5.05281	5.04158	1533	47	7.33498
162-982B-15H-5-A 39	135.39	149.45	149.09	5.05298	5.04171	1584	24	7.36771
162-982B-15H-5-A 42	135.42	149.48	149.12	5.05348	5.0421	1549	69	7.34537
162-982B-15H-5-A 47	135.47	149.53	149.17	5.05432	5.04275	1687	75	7.43071
162-982B-15H-5-A 48	135.48	149.54	149.18	5.05449	5.04288	1337	57	7.19818
162-982B-15H-5-A 49	135.49	149.55	149.19	5.05465	5.04301	1488	74	7.30519
162-982B-15H-5-A 52	135.52	149.58	149.22	5.05516	5.0434	1505	79	7.31655
162-982B-15H-5-A 53	135.53	149.59	149.23	5.05532	5.04353	1506	41	7.31721
162-982B-15H-5-A 56	135.56	149.62	149.26	5.05583	5.04392	1538	91	7.33824
162-982B-15H-5-A 58	135.58	149.64	149.28	5.05616	5.04418	1629	73	7.39572
162-982B-15H-5-A 61	135.61	149.67	149.31	5.05666	5.04457	1482	34	7.30115
162-982B-15H-5-A 62	135.62	149.68	149.32	5.05683	5.0447	1638	27	7.40123
162-982B-15H-5-A 65	135.65	149.71	149.35	5.05733	5.04509	1781	56	7.48493
162-982B-15H-5-A 66	135.66	149.72	149.36	5.0575	5.04522	1664	43	7.41698
162-982B-15H-5-A 68	135.68	149.74	149.38	5.05784	5.04548	1688	52	7.4313
162-982B-15H-5-A 69	135.69	149.75	149.39	5.058	5.0456	1610	22	7.38399
162-982B-15H-5-A 70	135.7	149.76	149.4	5.05817	5.04573	1558	29	7.35116
162-982B-15H-5-A 73	135.73	149.79	149.43	5.05867	5.04612	1587	72	7.3696
162-982B-15H-5-A 74	135.74	149.8	149.44	5.05884	5.04625	1872	38	7.53476
162-982B-15H-5-A 77	135.77	149.83	149.47	5.05934	5.04664	1854	47	7.5251
162-982B-15H-5-A 78	135.78	149.84	149.48	5.05951	5.04677	1721	72	7.45066
162-982B-15H-5-A 80	135.8	149.86	149.5	5.05984	5.04703	1622	58	7.39142
162-982B-15H-5-A 82	135.82	149.88	149.52	5.06018	5.04729	1953	52	7.57712
162-982B-15H-5-A 84	135.84	149.9	149.54	5.06051	5.04755	1603	40	7.37963
162-982B-15H-5-A 85	135.85	149.91	149.55	5.06068	5.04768	1540	48	7.33954
162-982B-15H-5-A 87.5	135.88	149.94	149.58	5.06118	5.04807	2090	47	7.64492
162-982B-15H-5-A 90	135.9	149.96	149.6	5.06152	5.04833	1940	38	7.57044
162-982B-15H-5-A 92	135.92	149.98	149.62	5.06185	5.04859	1764	48	7.47534
162-982B-15H-5-A 95	135.95	150.01	149.65	5.06236	5.04898	1698	45	7.43721
162-982B-15H-5-A 96	135.96	150.02	149.66	5.06252	5.04911	1584	37	7.36771
162-982B-15H-5-A 98	135.98	150.04	149.68	5.06286	5.04937	1563	39	7.35436
162-982B-15H-5-A 99	135.99	150.05	149.69	5.06303	5.0495	1616	2	7.38771
162-982B-15H-5-A 102	136.02	150.08	149.72	5.06353	5.04989	1465	44	7.28961
162-982B-15H-5-A 103	136.03	150.09	149.73	5.0637	5.05002	1418	28	7.257
162-982B-15H-5-A 105.5	136.06	150.12	149.76	5.0642	5.05041	1473	64	7.29506
162-982B-15H-5-A 108	136.08	150.14	149.78	5.06453	5.05067	1307	66	7.17549
162-982B-15H-5-A 109	136.09	150.15	149.79	5.0647	5.0508	1553	45	7.34794
162-982B-15H-5-A 112	136.12	150.18	149.82	5.0652	5.05119	1476	-6	7.29709
162-982B-15H-5-A 115	136.15	150.21	149.85	5.0657	5.05158	1405	50	7.24779
162-982B-15H-5-A 118	136.18	150.24	149.88	5.06621	5.05196	1649	50	7.40792
162-982B-15H-5-A 120	136.2	150.26	149.9	5.06654	5.05222	1587	61	7.3696
162-982B-15H-5-A 121	136.21	150.27	149.91	5.06671	5.05235	1580	22	7.36518
162-982B-15H-5-A 124	136.24	150.3	149.94	5.06721	5.05274	1811	75	7.50163
162-982B-15H-5-A 125	136.25	150.31	149.95	5.06738	5.05287	1823	36	7.50824
162-982B-15H-5-A 128	136.28	150.34	149.98	5.06788	5.05326	1906	53	7.55276
162-982B-15H-5-A 129	136.29	150.35	149.99	5.06805	5.05339	1676	75	7.42417
162-982B-15H-5-A 132	136.32	150.38	150.02	5.06855	5.05378	1917	66	7.55852
162-982B-15H-5-A 133	136.33	150.39	150.03	5.06872	5.05391	1941	81	7.57096
162-982B-15H-5-A 135.5	136.36	150.42	150.06	5.06922	5.0543	1734	28	7.45819
162-982B-15H-5-A 137	136.37	150.43	150.07	5.06939	5.05443	2017	41	7.60937
162-982B-15H-5-A 139	136.39	150.45	150.09	5.06972	5.05469	2094	66	7.64683
162-982B-15H-5-A 140	136.4	150.46	150.1	5.06989	5.05482	2273	35	7.72886
162-982B-15H-5-A 143	136.43	150.49	150.13	5.07039	5.05521	2456	19	7.80629
162-982B-15H-5-A 144	136.44	150.5	150.14	5.07056	5.05534	2463	23	7.80914
162-982B-15H-5-A 146	136.46	150.52	150.16	5.0709	5.0556	2475	52	7.814
162-982B-15H-5-A 148	136.48	150.54	150.18	5.07123	5.05586	2321	71	7.74975
162-982B-15H-6-A 2	136.52	150.58	150.22	5.0719	5.05638	2504	52	7.82564
162-982B-15H-6-A 3	136.53	150.59	150.23	5.07207	5.05651	2566	20	7.8501
162-982B-15H-6-A 7	136.57	150.63	150.27	5.07274	5.05703	1822	54	7.50769
162-982B-15H-6-A 10	136.6	150.66	150.3	5.07324	5.05742	2908	51	7.97522
162-982B-15H-6-A 11	136.61	150.67	150.31	5.07341	5.05755	3035	49	8.01797
162-982B-15H-6-A 13.5	136.64	150.7	150.34	5.07391	5.05794	3040	20	8.01961
162-982B-15H-6-A 19	136.69	150.75	150.39	5.07475	5.05858	2776	52	7.92877
162-982B-15H-6-A 22	136.72	150.78	150.42	5.07525	5.05897	3210	75	8.07403
162-982B-15H-6-A 23	136.73	150.79	150.43	5.07542	5.0591	3471	68	8.1522
162-982B-15H-6-A 29	136.79	150.85	150.49	5.07642	5.05988	3646	61	8.20139
162-982B-15H-6-A 30	136.8	150.86	150.5	5.07659	5.06001	4005	112	8.2953
162-982B-15H-6-A 31	136.81	150.87	150.51	5.07676	5.06014	3405	41	8.133
162-982B-15H-6-A 33	136.83	150.89	150.53	5.07709	5.0604	3533	47	8.1699
162-982B-15H-6-A 38	136.88	150.94	150.58	5.07793	5.06105	3435	59	8.14177
162-982B-15H-6-A 41	136.91	150.97	150.61	5.07843	5.06144	3926	2	8.27538
162-982B-15H-6-A 42	136.92	150.98	150.62	5.0786	5.06157	3620	36	8.19423
162-982B-15H-6-A 43	136.93	150.99	150.63	5.07877	5.0617	3551	55	8.17498
162-982B-15H-6-A 48	136.98	151.04	150.68	5.0796	5.06235	2639	13	7.87816
162-982A-15H-2-A 52	133.72	151	150.71	5.08011	5.06274	2035	28	7.61825
162-982A-15H-2-A 54	133.74	151.02	150.73	5.08044	5.063	2165	52	7.68018
162-982A-15H-2-A 55	133.75	151.03	150.74	5.08061	5.06313	2381	85	7.77528
162-982A-15H-2-A 58	133.78	151.06	150.77	5.08111	5.06352	1619	44	7.38956
162-982A-15H-2-A 60	133.8	151.08	150.79	5.08144	5.06378	1693	58	7.43426
162-982A-15H-2-A 63	133.83	151.11	150.82	5.08195	5.06417	1580	78	7.36518
162-982A-15H-2-A 64	133.84	151.12	150.83	5.08211	5.06429	1512	41	7.32119
162-982A-15H-2-A 66	133.86	151.14	150.85	5.08245	5.06455	1468	84	7.29166
162-982A-15H-2-A 67	133.87	151.15	150.86	5.08262	5.06468	1521	22	7.32712
162-982A-15H-2-A 68	133.88	151.16	150.87	5.08278	5.06481	1486	19	7.30384
162-982A-15H-2-A 70	133.9	151.18	150.89	5.08312	5.06507	1513	6	7.32185
162-982A-15H-2-A 72	133.92	151.2	150.91	5.08345	5.06533	1587	37	7.3696
162-982A-15H-2-A 75	133.95	151.23	150.94	5.08396	5.06572	1599	41	7.37713
162-982A-15H-2-A 76	133.96	151.24	150.95	5.08412	5.06585	1706	44	7.44191
162-982A-15H-2-A 78	133.98	151.26	150.97	5.08446	5.06611	1508	52	7.31854
162-982A-15H-2-A 80	134	151.28	150.99	5.08479	5.06637	1629	16	7.39572
162-982A-15H-2-A 82	134.02	151.3	151.01	5.08513	5.06663	1692	46	7.43367
162-982A-15H-2-A 83	134.03	151.31	151.02	5.0853	5.06676	1506	68	7.31721
162-982A-15H-2-A 86	134.06	151.34	151.05	5.0858	5.06715	1634	42	7.39879
162-982A-15H-2-A 87	134.07	151.35	151.06	5.08597	5.06728	1832	64	7.51316
162-982A-15H-2-A 90	134.1	151.38	151.09	5.08647	5.06767	2028	82	7.61481
162-982A-15H-2-A 91	134.11	151.39	151.1	5.08664	5.0678	1826	78	7.50988
162-982A-15H-2-A 95	134.15	151.43	151.14	5.08731	5.06832	2050	47	7.6256
162-982A-15H-2-A 96	134.16	151.44	151.15	5.08747	5.06845	2117	80	7.65776
162-982A-15H-2-A 98	134.18	151.46	151.17	5.08781	5.06871	2008	79	7.60489
162-982A-15H-2-A 101	134.21	151.49	151.2	5.08831	5.0691	2599	95	7.86288
162-982A-15H-2-A 102	134.22	151.5	151.21	5.08848	5.06923	2695	58	7.89915
162-982A-15H-2-A 104	134.24	151.52	151.23	5.08881	5.06949	3158	24	8.05769
162-982A-15H-2-A 105	134.25	151.53	151.24	5.08898	5.06962	3016	122	8.01169
162-982A-15H-2-A 108	134.28	151.56	151.27	5.08948	5.07001	3101	72	8.03948
162-982A-15H-2-A 109	134.29	151.57	151.28	5.08965	5.07014	3294	78	8.09986
162-982A-15H-2-A 112	134.32	151.6	151.31	5.09015	5.07053	3270	116	8.09255
162-982A-15H-2-A 114	134.34	151.62	151.33	5.09049	5.07078	4198	119	8.34236
162-982A-15H-2-A 115	134.35	151.63	151.34	5.09065	5.07091	4424	132	8.3948
162-982A-15H-2-A 116	134.36	151.64	151.35	5.09082	5.07104	4796	111	8.47554
162-982A-15H-2-A 119	134.39	151.67	151.38	5.09132	5.07143	4295	156	8.36521
162-982A-15H-2-A 120	134.4	151.68	151.39	5.09149	5.07156	1587	52	7.3696
162-982A-15H-2-A 121	134.41	151.69	151.4	5.09166	5.07169	3934	125	8.27741
162-982A-15H-2-A 124	134.44	151.72	151.43	5.09216	5.07208	2057	63	7.629
162-982A-15H-2-A 126	134.46	151.74	151.45	5.0925	5.07234	1583	66	7.36708
162-982A-15H-2-A 127	134.47	151.75	151.46	5.09266	5.07247	1485	41	7.30317
162-982A-15H-2-A 131	134.51	151.79	151.5	5.09333	5.07299	1475	32	7.29641
162-982A-15H-2-A 132	134.52	151.8	151.51	5.0935	5.07312	1552	47	7.3473
162-982A-15H-2-A 134	134.54	151.82	151.53	5.09384	5.07338	1561	52	7.35308
162-982A-15H-2-A 135	134.55	151.83	151.54	5.094	5.07351	1386	75	7.23418
162-982A-15H-2-A 139	134.59	151.87	151.58	5.09467	5.07403	1211	58	7.0992
162-982A-15H-2-A 140	134.6	151.88	151.59	5.09484	5.07416	1328	44	7.19143
162-982A-15H-2-A 142	134.62	151.9	151.61	5.09518	5.07442	1211	33	7.0992
162-982A-15H-2-A 144	134.64	151.92	151.63	5.09551	5.07468	1136	86	7.03527
162-982A-15H-2-A 146	134.66	151.94	151.65	5.09584	5.07494	1231	27	7.11558
162-982A-15H-2-A 148	134.68	151.96	151.67	5.09618	5.0752	1354	44	7.21082
162-982A-15H-2-A 150	134.7	151.98	151.69	5.09651	5.07546	1527	36	7.33106
162-982A-15H-2-A 151	134.71	151.99	151.7	5.09668	5.07559	1429	47	7.26473
162-982A-15H-3-A 2	134.72	152	151.71	5.09685	5.07572	1423	58	7.26052
162-982A-15H-3-A 4	134.74	152.02	151.73	5.09718	5.07598	1470	47	7.29302
162-982A-15H-3-A 6	134.76	152.04	151.75	5.09752	5.07624	1529	34	7.33237
162-982A-15H-3-A 8	134.78	152.06	151.77	5.09785	5.0765	1419	58	7.25771
162-982A-15H-3-A 10	134.8	152.08	151.79	5.09819	5.07676	1400	41	7.24423
162-982A-15H-3-A 11	134.81	152.09	151.8	5.09836	5.07689	1420	33	7.25841
162-982A-15H-3-A 14	134.84	152.12	151.83	5.09886	5.07727	1477	46	7.29777
162-982A-15H-3-A 16	134.86	152.14	151.85	5.09919	5.07753	1483	44	7.30182
162-982A-15H-3-A 19	134.89	152.17	151.88	5.0997	5.07792	1512	2	7.32119
162-982A-15H-3-A 22	134.92	152.2	151.91	5.1002	5.07831	1358	28	7.21377
162-982A-15H-3-A 24	134.94	152.22	151.93	5.10053	5.07857	1523	64	7.32844
162-982A-15H-3-A 26	134.96	152.24	151.95	5.10087	5.07883	1571	54	7.35947
162-982A-15H-3-A 29	134.99	152.27	151.98	5.10137	5.07922	1599	31	7.37713
162-982A-15H-3-A 30	135	152.28	151.99	5.10154	5.07935	1656	19	7.41216
162-982A-15H-3-A 32	135.02	152.3	152.01	5.10187	5.07961	1681	33	7.42714
162-982A-15H-3-A 35	135.05	152.33	152.04	5.10238	5.08	1320	25	7.18539
162-982A-15H-3-A 36	135.06	152.34	152.05	5.10254	5.08021	1551	36	7.34666
162-982A-15H-3-A 39	135.09	152.37	152.08	5.10304	5.08084	1630	74	7.39634
162-982A-15H-3-A 40	135.1	152.38	152.09	5.10321	5.08106	1761	38	7.47364
162-982A-15H-3-A 42	135.12	152.4	152.11	5.10355	5.08148	1667	-9	7.41878
162-982A-15H-3-A 45	135.15	152.43	152.14	5.10405	5.08211	1526	61	7.33041
162-982A-15H-3-A 46	135.16	152.44	152.15	5.10422	5.08232	1516	66	7.32383
162-982A-15H-3-A 49	135.19	152.47	152.18	5.10472	5.08296	1659	71	7.41397
162-982A-15H-3-A 50	135.2	152.48	152.19	5.10489	5.08317	1641	72	7.40306
162-982A-15H-3-A 52	135.22	152.5	152.21	5.10522	5.08359	1733	40	7.45761
162-982A-15H-3-A 54	135.24	152.52	152.23	5.10556	5.08401	1757	36	7.47136
162-982A-15H-3-A 56	135.26	152.54	152.25	5.10589	5.08443	1657	41	7.41276
162-982A-15H-3-A 57	135.27	152.55	152.26	5.10606	5.08464	1701	61	7.43897
162-982A-15H-3-A 60	135.3	152.58	152.29	5.10656	5.08528	2013	89	7.60738
162-982A-15H-3-A 61	135.31	152.59	152.3	5.10673	5.08549	1733	27	7.45761
162-982A-15H-3-A 64.5	135.35	152.63	152.34	5.1074	5.08633	2160	66	7.67786
162-982A-15H-3-A 66	135.36	152.64	152.35	5.10757	5.08654	1998	49	7.5999
162-982A-15H-3-A 67	135.37	152.65	152.36	5.10773	5.08676	2010	58	7.60589
162-982A-15H-3-A 70	135.4	152.68	152.39	5.10824	5.08739	2036	42	7.61874
162-982A-15H-3-A 71	135.41	152.69	152.4	5.1084	5.0876	2411	71	7.7878
162-982A-15H-3-A 74	135.44	152.72	152.43	5.10891	5.08823	2102	107	7.65064
162-982A-15H-3-A 76	135.46	152.74	152.45	5.10924	5.08866	1945	38	7.57302
162-982A-15H-3-A 77	135.47	152.75	152.46	5.10941	5.08887	1755	80	7.47022
162-982A-15H-3-A 80	135.5	152.78	152.49	5.10991	5.0895	1992	48	7.59689
162-982A-15H-3-A 81	135.51	152.79	152.5	5.11008	5.08971	1788	5	7.48885
162-982A-15H-3-A 84	135.54	152.82	152.53	5.11058	5.09034	1793	61	7.49165
162-982A-15H-3-A 85	135.55	152.83	152.54	5.11075	5.09056	1905	38	7.55224
162-982A-15H-3-A 88	135.58	152.86	152.57	5.11125	5.09119	1763	55	7.47477
162-982A-15H-3-A 90	135.6	152.88	152.59	5.11158	5.09161	1851	33	7.52348
162-982A-15H-3-A 93	135.63	152.91	152.62	5.11209	5.09224	1989	54	7.59539
162-982A-15H-3-A 94	135.64	152.92	152.63	5.11225	5.09246	2175	61	7.68478
162-982A-15H-3-A 96	135.66	152.94	152.65	5.11259	5.09288	2114	66	7.65634
162-982A-15H-3-A 99	135.69	152.97	152.68	5.11309	5.09351	2442	49	7.80057
162-982A-15H-3-A 102	135.72	153	152.71	5.11359	5.09414	2318	41	7.74846
162-982A-15H-3-A 104	135.74	153.02	152.73	5.11393	5.09457	2329	83	7.75319
162-982A-15H-3-A 107	135.77	153.05	152.76	5.11443	5.0952	2442	6	7.80057
162-982A-15H-3-A 108	135.78	153.06	152.77	5.1146	5.09541	2435	44	7.7977
162-982A-15H-3-A 109	135.79	153.07	152.78	5.11477	5.09562	2452	112	7.80466
162-982A-15H-3-A 112	135.82	153.1	152.81	5.11527	5.09626	2547	36	7.84267
162-982A-15H-3-A 114	135.84	153.12	152.83	5.1156	5.09668	2537	72	7.83874
162-982A-15H-3-A 116	135.86	153.14	152.85	5.11594	5.0971	2667	41	7.88871
162-982A-15H-3-A 119	135.89	153.17	152.88	5.11644	5.09773	2822	62	7.9452
162-982A-15H-3-A 120	135.9	153.18	152.89	5.11661	5.09794	2862	61	7.95928
162-982A-15H-3-A 122	135.92	153.2	152.91	5.11694	5.09837	2894	18	7.9704
162-982A-15H-3-A 124	135.94	153.22	152.93	5.11728	5.09879	2790	91	7.9338
162-982A-15H-3-A 127	135.97	153.25	152.96	5.11778	5.09942	2913	58	7.97694
162-982A-15H-3-A 128	135.98	153.26	152.97	5.11795	5.09963	2995	57	8.0047
162-982A-15H-3-A 130	136	153.28	152.99	5.11828	5.10006	2681	32	7.89395
162-982A-15H-3-A 131	136.01	153.29	153	5.11845	5.10027	2629	48	7.87436
162-982A-15H-3-A 135	136.05	153.33	153.04	5.11912	5.10111	2771	71	7.92696
162-982A-15H-3-A 136	136.06	153.34	153.05	5.11929	5.10132	2614	27	7.86864
162-982A-15H-3-A 138	136.08	153.36	153.07	5.11962	5.10174	2597	59	7.86211
162-982A-15H-3-A 140	136.1	153.38	153.09	5.11996	5.10217	2722	30	7.90912
162-982A-15H-3-A 141	136.11	153.39	153.1	5.12012	5.10238	2654	66	7.88382
162-982A-15H-3-A 142	136.12	153.4	153.11	5.12029	5.10259	2576	64	7.85399
162-982A-15H-3-A 144	136.14	153.42	153.13	5.12063	5.10301	2771	67	7.92696
162-982A-15H-3-A 145	136.15	153.43	153.14	5.12079	5.10322	2789	57	7.93344
162-982A-15H-3-A 146	136.16	153.44	153.15	5.12096	5.10343	2617	83	7.86978
162-982A-15H-3-A 147	136.17	153.45	153.16	5.12113	5.10364	2426	54	7.794
162-982A-15H-4-A 2	136.2	153.48	153.19	5.12163	5.10428	2520	31	7.83201
162-982A-15H-4-A 4	136.22	153.5	153.21	5.12197	5.1047	2313	40	7.7463
162-982A-15H-4-A 6	136.24	153.52	153.23	5.1223	5.10512	1953	10	7.57712
162-982A-15H-4-A 8	136.26	153.54	153.25	5.12264	5.10554	1787	77	7.48829
162-982A-15H-4-A 9	136.27	153.55	153.26	5.1228	5.10576	1847	24	7.52132
162-982A-15H-4-A 12	136.3	153.58	153.29	5.12331	5.10639	1754	97	7.46965
162-982A-15H-4-A 14	136.32	153.6	153.31	5.12364	5.10681	1610	53	7.38399
162-982A-15H-4-A 17	136.35	153.63	153.34	5.12414	5.10744	1371	53	7.2233
162-982A-15H-4-A 19	136.37	153.65	153.36	5.12448	5.10787	1444	19	7.27517
162-982A-15H-4-A 20	136.38	153.66	153.37	5.12465	5.10808	1499	44	7.31255
162-982A-15H-4-A 21	136.39	153.67	153.38	5.12481	5.10829	1495	79	7.30988
162-982A-15H-4-A 22	136.4	153.68	153.39	5.12498	5.1085	1268	19	7.1452
162-982A-15H-4-A 25	136.43	153.71	153.42	5.12548	5.10913	1565	31	7.35564
162-982A-15H-4-A 26	136.44	153.72	153.43	5.12565	5.10934	1503	51	7.31522
162-982A-15H-4-A 29	136.47	153.75	153.46	5.12615	5.10998	1449	47	7.27863
162-982A-15H-4-A 30	136.48	153.76	153.47	5.12632	5.11019	1379	30	7.22911
162-982A-15H-4-A 32	136.5	153.78	153.49	5.12665	5.11061	1398	33	7.2428
162-982A-15H-4-A 34	136.52	153.8	153.51	5.12699	5.11103	1553	55	7.34794
162-982A-15H-4-A 37	136.55	153.83	153.54	5.12749	5.11167	1391	-10	7.23778
162-982A-15H-4-A 39	136.57	153.85	153.56	5.12783	5.11209	1535	65	7.33629
162-982A-15H-4-A 40	136.58	153.86	153.57	5.12799	5.1123	1871	46	7.53423
162-982A-15H-4-A 43	136.61	153.89	153.6	5.1285	5.11293	1354	78	7.21082
162-982A-15H-4-A 46	136.64	153.92	153.63	5.129	5.11357	1505	57	7.31655
162-982A-15H-4-A 49	136.67	153.95	153.66	5.1295	5.1142	1382	10	7.23129
162-982A-15H-4-A 50	136.68	153.96	153.67	5.12967	5.11441	1424	55	7.26123
162-982A-15H-4-A 54	136.72	154	153.71	5.13034	5.11526	1737	31	7.45991
162-982A-15H-4-A 56	136.74	154.02	153.73	5.13067	5.11568	1510	23	7.31986
162-982A-15H-4-A 58	136.76	154.04	153.75	5.13101	5.1161	1335	24	7.19669
162-982A-15H-4-A 59	136.77	154.05	153.76	5.13118	5.11631	1235	43	7.11883
162-982A-15H-4-A 61	136.79	154.07	153.78	5.13151	5.11673	1333	51	7.19519
162-982A-15H-4-A 64	136.82	154.1	153.81	5.13201	5.11737	1361	30	7.21597
162-982A-15H-4-A 66	136.84	154.12	153.83	5.13235	5.11779	1692	39	7.43367
162-982A-15H-4-A 67	136.85	154.13	153.84	5.13251	5.118	1502	64	7.31455
162-982A-15H-4-A 70	136.88	154.16	153.87	5.13302	5.11879	1529	42	7.33237
162-982A-15H-4-A 72	136.9	154.18	153.89	5.13335	5.11932	1390	42	7.23706
162-982A-15H-4-A 74	136.92	154.2	153.91	5.13369	5.11985	1619	33	7.38956
162-982A-15H-4-A 75	136.93	154.21	153.92	5.13385	5.12011	1596	43	7.37526
162-982A-15H-4-A 78	136.96	154.24	153.95	5.13436	5.12091	1689	75	7.43189
162-982A-15H-4-A 80	136.98	154.26	153.97	5.13469	5.12143	1753	44	7.46908
162-982A-15H-4-A 83	137.01	154.29	154	5.13519	5.12223	1916	53	7.55799
162-982A-15H-4-A 84	137.02	154.3	154.01	5.13536	5.12249	1811	82	7.50163
162-982A-15H-4-A 87	137.05	154.33	154.04	5.13586	5.12328	1893	37	7.54592
162-982A-15H-4-A 88	137.06	154.34	154.05	5.13603	5.12355	1856	37	7.52618
162-982A-15H-4-A 91	137.09	154.37	154.08	5.13653	5.12434	2318	53	7.74846
162-982A-15H-4-A 92	137.1	154.38	154.09	5.1367	5.1246	2029	52	7.6153
162-982A-15H-4-A 94.5	137.13	154.41	154.12	5.1372	5.1254	2570	22	7.85166
162-982A-15H-4-A 97	137.15	154.43	154.14	5.13754	5.12592	2989	43	8.00269
162-982A-15H-4-A 98	137.16	154.44	154.15	5.13771	5.12619	2781	54	7.93057
162-982A-15H-4-A 101	137.19	154.47	154.18	5.13821	5.12698	2665	19	7.88796
162-982A-15H-4-A 102	137.2	154.48	154.19	5.13838	5.12725	2693	17	7.89841
162-982A-15H-4-A 103	137.21	154.49	154.2	5.13854	5.12751	2773	44	7.92769
162-982A-15H-4-A 106	137.24	154.52	154.23	5.13905	5.1283	2554	58	7.84542
162-982A-15H-4-A 108	137.26	154.54	154.25	5.13938	5.12883	2215	23	7.70301
162-982A-15H-4-A 110	137.28	154.56	154.27	5.13972	5.12936	2280	72	7.73193
162-982A-15H-4-A 112	137.3	154.58	154.29	5.14005	5.12989	2120	55	7.65917
162-982A-15H-4-A 115	137.33	154.61	154.32	5.14055	5.13068	1802	48	7.49665
162-982A-15H-4-A 116	137.34	154.62	154.33	5.14072	5.13094	1868	71	7.53262
162-982A-15H-4-A 118	137.36	154.64	154.35	5.14106	5.13147	1930	38	7.56528
162-982A-15H-4-A 121	137.39	154.67	154.38	5.14156	5.13226	1750	-4	7.46737
162-982A-15H-4-A 123	137.41	154.69	154.4	5.14189	5.13279	1653	44	7.41035
162-982A-15H-4-A 124	137.42	154.7	154.41	5.14206	5.13306	1652	55	7.40974
162-982A-15H-4-A 127	137.45	154.73	154.44	5.14256	5.13385	1693	41	7.43426
162-982A-15H-4-A 128	137.46	154.74	154.45	5.14273	5.13411	1425	-6	7.26193
162-982A-15H-4-A 130	137.48	154.76	154.47	5.14306	5.13464	1743	67	7.46336
162-982A-15H-4-A 131	137.49	154.77	154.48	5.14323	5.13491	1527	38	7.33106
162-982A-15H-4-A 136	137.54	154.82	154.53	5.14407	5.13623	1710	73	7.44425
162-982A-15H-4-A 138	137.56	154.84	154.55	5.1444	5.13675	1430	52	7.26543
162-982A-15H-4-A 139	137.57	154.85	154.56	5.14457	5.13702	1538	75	7.33824
162-982A-15H-4-A 140	137.58	154.86	154.57	5.14474	5.13728	1617	44	7.38833
162-982A-15H-5-A 2	137.7	154.98	154.69	5.14675	5.14045	2371	69	7.77107
162-982A-15H-5-A 4	137.72	155	154.71	5.14708	5.14098	2400	50	7.78322
162-982A-15H-5-A 6	137.74	155.02	154.73	5.14742	5.14151	2567	42	7.85049
162-982A-15H-5-A 9	137.77	155.05	154.76	5.14792	5.1423	2546	31	7.84228
162-982A-15H-5-A 10	137.78	155.06	154.77	5.14809	5.14257	2608	44	7.86634
162-982A-15H-5-A 13	137.81	155.09	154.8	5.14859	5.14336	2596	72	7.86173
162-982A-15H-5-A 14	137.82	155.1	154.81	5.14876	5.14362	2446	43	7.80221
162-982A-15H-5-A 17	137.85	155.13	154.84	5.14926	5.14441	2783	64	7.93128
162-982A-15H-5-A 18	137.86	155.14	154.85	5.14943	5.14468	2888	50	7.96832
162-982A-15H-5-A 20.5	137.89	155.17	154.88	5.14993	5.14547	2967	48	7.99531
162-982A-15H-5-A 23	137.91	155.19	154.9	5.15026	5.146	2975	52	7.998
162-982A-15H-5-A 24	137.92	155.2	154.91	5.15043	5.14626	3103	89	8.04012
162-982A-15H-5-A 27	137.95	155.23	154.94	5.15093	5.14706	3555	79	8.17611
162-982A-15H-5-A 28	137.96	155.24	154.95	5.1511	5.14732	4137	73	8.32773
162-982A-15H-5-A 30	137.98	155.26	154.97	5.15144	5.14785	4603	91	8.43446
162-982A-15H-5-A 32.5	138.01	155.29	155	5.15194	5.14864	5228	164	8.56178
162-982A-15H-5-A 35	138.03	155.31	155.02	5.15227	5.14917	6136	134	8.72193
162-982A-15H-5-A 36	138.04	155.32	155.03	5.15244	5.14943	6085	131	8.71358
162-982A-15H-5-A 37	138.05	155.33	155.04	5.15261	5.1497	5662	121	8.64153
162-982A-15H-5-A 40	138.08	155.36	155.07	5.15311	5.15049	2446	53	7.80221
162-982A-15H-5-A 41	138.09	155.37	155.08	5.15328	5.15075	2446	52	7.80221
162-982A-15H-5-A 44	138.12	155.4	155.11	5.15378	5.15155	3501	54	8.1608
162-982A-15H-5-A 45	138.13	155.41	155.12	5.15395	5.15181	3468	111	8.15133
162-982A-15H-5-A 47.5	138.16	155.44	155.15	5.15445	5.1526	2746	36	7.9179
162-982A-15H-5-A 50	138.18	155.46	155.17	5.15479	5.15313	3368	47	8.12207
162-982A-15H-5-A 52	138.2	155.48	155.19	5.15512	5.15366	3174	48	8.06275
162-982A-15H-5-A 53	138.21	155.49	155.2	5.15529	5.15392	2966	39	7.99497
162-982A-15H-5-A 56	138.24	155.52	155.23	5.15579	5.15472	2133	45	7.66528
162-982A-15H-5-A 57	138.25	155.53	155.24	5.15596	5.15498	2169	22	7.68202
162-982A-15H-5-A 60	138.28	155.56	155.27	5.15646	5.15577	2319	41	7.74889
162-982A-15H-5-A 63	138.31	155.59	155.3	5.15696	5.15657	2213	55	7.7021
162-982A-15H-5-A 64	138.32	155.6	155.31	5.15713	5.15683	1986	41	7.59388
162-982A-15H-5-A 67	138.35	155.63	155.34	5.15763	5.15762	2223	16	7.70661
162-982A-15H-5-A 68	138.36	155.64	155.35	5.1578	5.15789	2249	53	7.71824
162-982A-15H-5-A 69	138.37	155.65	155.36	5.15797	5.15815	2036	45	7.61874
162-982A-15H-5-A 72	138.4	155.68	155.39	5.15847	5.15894	2174	61	7.68432
162-982A-15H-5-A 73	138.41	155.69	155.4	5.15864	5.15921	2160	45	7.67786
162-982A-15H-5-A 74	138.42	155.7	155.41	5.1588	5.15947	2123	66	7.66059
162-982B-16H-2-A 99	140.99	155.73	155.44	5.15931	5.16016	2076	39	7.6382
162-982B-16H-2-A 102	141.02	155.76	155.47	5.15981	5.16066	2409	54	7.78697
162-982B-16H-2-A 104	141.04	155.78	155.49	5.16014	5.16098	2358	80	7.76557
162-982B-16H-2-A 106	141.06	155.8	155.51	5.16048	5.16131	2309	43	7.74457
162-982B-16H-2-A 109	141.09	155.83	155.54	5.16098	5.1618	2325	92	7.75148
162-982B-16H-2-A 110	141.1	155.84	155.55	5.16115	5.16197	2409	48	7.78697
162-982B-16H-2-A 112	141.12	155.86	155.57	5.16148	5.1623	2415	5	7.78945
162-982B-16H-2-A 113	141.13	155.87	155.58	5.16165	5.16246	2295	80	7.73849
162-982B-16H-2-A 116	141.16	155.9	155.61	5.16215	5.16295	2234	54	7.71155
162-982B-16H-2-A 118	141.18	155.92	155.63	5.16249	5.16328	2068	24	7.63434
162-982B-16H-2-A 120	141.2	155.94	155.65	5.16282	5.16361	2129	47	7.66341
162-982B-16H-2-A 122	141.22	155.96	155.67	5.16316	5.16394	2387	54	7.77779
162-982B-16H-2-A 123	141.23	155.97	155.68	5.16332	5.1641	2341	33	7.75833
162-982B-16H-2-A 126	141.26	156	155.71	5.16383	5.16459	2235	43	7.712
162-982B-16H-2-A 128	141.28	156.02	155.73	5.16416	5.16492	2061	53	7.63095
162-982B-16H-2-A 129	141.29	156.03	155.74	5.16433	5.16508	2218	55	7.70436
162-982B-16H-2-A 132	141.32	156.06	155.77	5.16483	5.16558	2176	59	7.68524
162-982B-16H-2-A 134	141.34	156.08	155.79	5.16517	5.1659	2722	57	7.90912
162-982B-16H-2-A 135	141.35	156.09	155.8	5.16533	5.16607	2616	27	7.8694
162-982B-16H-2-A 140	141.4	156.14	155.85	5.16617	5.16689	2816	52	7.94307
162-982B-16H-2-A 142	141.42	156.16	155.87	5.16651	5.16722	2796	44	7.93595
162-982B-16H-2-A 144	141.44	156.18	155.89	5.16684	5.16754	2960	26	7.99294
162-982B-16H-2-A 148	141.48	156.22	155.93	5.16751	5.1682	3134	34	8.05007
162-982B-16H-3-A 2	141.52	156.26	155.97	5.16818	5.16886	3142	61	8.05262
162-982B-16H-3-A 4	141.54	156.28	155.99	5.16852	5.16918	3306	32	8.10349
162-982B-16H-3-A 5	141.55	156.29	156	5.16868	5.16935	3289	47	8.09834
162-982B-16H-3-A 9.5	141.6	156.34	156.05	5.16952	5.17017	3228	30	8.07962
162-982B-16H-3-A 11	141.61	156.35	156.06	5.16969	5.17033	3465	52	8.15047
162-982B-16H-3-A 12	141.62	156.36	156.07	5.16986	5.1705	3432	33	8.1409
162-982B-16H-3-A 14	141.64	156.38	156.09	5.17019	5.17082	3129	61	8.04847
162-982B-16H-3-A 15	141.65	156.39	156.1	5.17036	5.17099	3139	36	8.05166
162-982B-16H-3-A 21	141.71	156.45	156.16	5.17136	5.17197	2802	17	7.93809
162-982B-16H-3-A 22	141.72	156.46	156.17	5.17153	5.17214	2844	27	7.95297
162-982B-16H-3-A 23.5	141.74	156.48	156.19	5.17186	5.17246	2411	55	7.7878
162-982B-16H-3-A 36	141.86	156.6	156.31	5.17387	5.17443	1734	69	7.45819
162-982B-16H-3-A 39.5	141.9	156.64	156.35	5.17454	5.17509	1979	66	7.59035
162-982B-16H-3-A 41	141.91	156.65	156.36	5.17471	5.17525	1943	51	7.57199
162-982B-16H-3-A 42	141.92	156.66	156.37	5.17488	5.17542	2036	45	7.61874
162-982B-16H-3-A 43	141.93	156.67	156.38	5.17505	5.17558	2047	44	7.62413
162-982B-16H-3-A 44.5	141.95	156.69	156.4	5.17538	5.17591	1543	71	7.34148
162-982B-16H-3-A 49.5	142	156.74	156.45	5.17622	5.17673	1851	45	7.52348
162-982B-16H-3-A 51	142.01	156.75	156.46	5.17639	5.17689	1639	63	7.40184
162-982B-16H-3-A 52	142.02	156.76	156.47	5.17655	5.17706	1576	40	7.36265
162-982B-16H-3-A 54	142.04	156.78	156.49	5.17689	5.17738	1607	44	7.38212
162-982B-16H-3-A 55	142.05	156.79	156.5	5.17706	5.17755	1495	24	7.30988
162-982B-16H-3-A 59.5	142.1	156.84	156.55	5.17789	5.17837	1320	28	7.18539
162-982B-16H-3-A 61	142.11	156.85	156.56	5.17806	5.17853	1468	58	7.29166
162-982B-16H-3-A 62	142.12	156.86	156.57	5.17823	5.1787	1246	65	7.12769
162-982B-16H-3-A 64	142.14	156.88	156.59	5.17856	5.17902	1381	10	7.23056
162-982B-16H-3-A 69.5	142.2	156.94	156.65	5.17957	5.18001	1385	44	7.23346
162-982B-16H-3-A 71	142.21	156.95	156.66	5.17973	5.18017	1558	52	7.35116
162-982B-16H-3-A 72	142.22	156.96	156.67	5.1799	5.18034	1393	41	7.23921
162-982B-16H-3-A 74	142.24	156.98	156.69	5.18024	5.18066	1399	61	7.24351
162-982B-16H-3-A 75	142.25	156.99	156.7	5.1804	5.18083	1409	44	7.25064
162-982B-16H-3-A 79.5	142.3	157.04	156.75	5.18124	5.18165	1547	43	7.34407
162-982B-16H-3-A 81	142.31	157.05	156.76	5.18141	5.18181	1572	80	7.3601
162-982B-16H-3-A 82	142.32	157.06	156.77	5.18158	5.18198	1533	46	7.33498
162-982B-16H-3-A 84	142.34	157.08	156.79	5.18191	5.1823	1450	64	7.27932
162-982B-16H-3-A 85	142.35	157.09	156.8	5.18208	5.18247	1443	78	7.27448
162-982B-16H-3-A 86	142.36	157.1	156.81	5.18225	5.18263	1538	67	7.33824
162-982B-16H-3-A 89.5	142.4	157.14	156.85	5.18292	5.18329	1523	30	7.32844
162-982B-16H-3-A 91	142.41	157.15	156.86	5.18308	5.18345	1656	3	7.41216
162-982B-16H-3-A 92	142.42	157.16	156.87	5.18325	5.18362	1447	29	7.27725
162-982B-16H-3-A 94	142.44	157.18	156.89	5.18359	5.18394	1571	11	7.35947
162-982B-16H-3-A 96	142.46	157.2	156.91	5.18392	5.18427	1477	71	7.29777
162-982B-16H-3-A 100	142.5	157.24	156.95	5.18459	5.18493	1335	94	7.19669
162-982B-16H-3-A 102	142.52	157.26	156.97	5.18493	5.18526	1548	-3	7.34472
162-982B-16H-3-A 104	142.54	157.28	156.99	5.18526	5.18558	1418	12	7.257
162-982B-16H-3-A 105	142.55	157.29	157	5.18543	5.18575	1490	69	7.30653
162-982B-16H-3-A 109.5	142.6	157.34	157.05	5.18626	5.18657	1548	47	7.34472
162-982B-16H-3-A 111	142.61	157.35	157.06	5.18643	5.18673	1435	54	7.26892
162-982B-16H-3-A 112	142.62	157.36	157.07	5.1866	5.1869	1563	34	7.35436
162-982B-16H-3-A 114	142.64	157.38	157.09	5.18693	5.18722	1582	43	7.36645
162-982B-16H-3-A 115	142.65	157.39	157.1	5.1871	5.18739	1447	60	7.27725
162-982B-16H-3-A 116	142.66	157.4	157.11	5.18727	5.18755	1407	13	7.24922
162-982B-16H-3-A 121	142.71	157.45	157.16	5.18811	5.18837	1390	37	7.23706
162-982B-16H-3-A 122	142.72	157.46	157.17	5.18827	5.18854	1284	44	7.15774
162-982B-16H-3-A 124	142.74	157.48	157.19	5.18861	5.18886	1372	26	7.22402
162-982B-16H-3-A 125	142.75	157.49	157.2	5.18878	5.18903	1416	38	7.25559
162-982B-16H-3-A 129.5	142.8	157.54	157.25	5.18961	5.18985	1348	86	7.20638
162-982B-16H-3-A 131	142.81	157.55	157.26	5.18978	5.19001	1436	55	7.26962
162-982B-16H-3-A 132	142.82	157.56	157.27	5.18995	5.19018	1302	22	7.17166
162-982B-16H-3-A 134	142.84	157.58	157.29	5.19028	5.1905	1393	29	7.23921
162-982B-16H-3-A 135	142.85	157.59	157.3	5.19045	5.19067	1378	50	7.22839
162-982B-16H-3-A 141	142.91	157.65	157.36	5.19146	5.19165	1511	62	7.32053
162-982B-16H-3-A 142	142.92	157.66	157.37	5.19162	5.19182	1577	31	7.36328
162-982B-16H-3-A 144	142.94	157.68	157.39	5.19196	5.19214	1468	50	7.29166
162-982B-16H-3-A 145	142.95	157.69	157.4	5.19213	5.19231	1361	61	7.21597
162-982B-16H-4-A 2	143.02	157.76	157.47	5.1933	5.19346	1326	26	7.18992
162-982B-16H-4-A 4	143.04	157.78	157.49	5.19363	5.19378	1454	31	7.28207
162-982B-16H-4-A 6	143.06	157.8	157.51	5.19397	5.19411	1464	19	7.28893
162-982B-16H-4-A 9.5	143.1	157.84	157.55	5.19464	5.19477	1450	47	7.27932
162-982B-16H-4-A 11	143.11	157.85	157.56	5.1948	5.19493	1445	52	7.27586
162-982B-16H-4-A 12	143.12	157.86	157.57	5.19497	5.1951	1599	29	7.37713
162-982B-16H-4-A 14	143.14	157.88	157.59	5.19531	5.19542	1411	85	7.25205
162-982B-16H-4-A 16	143.16	157.9	157.61	5.19564	5.19575	1607	64	7.38212
162-982B-16H-4-A 19.5	143.2	157.94	157.65	5.19631	5.19641	1562	22	7.35372
162-982B-16H-4-A 21	143.21	157.95	157.66	5.19648	5.19657	1594	59	7.374
162-982B-16H-4-A 22	143.22	157.96	157.67	5.19665	5.19674	1522	46	7.32778
162-982B-16H-4-A 24	143.24	157.98	157.69	5.19698	5.19706	1707	83	7.44249
162-982B-16H-4-A 25	143.25	157.99	157.7	5.19715	5.19723	1804	16	7.49776
162-982B-16H-4-A 29.5	143.3	158.04	157.75	5.19799	5.19805	1763	39	7.47477
162-982B-16H-4-A 31	143.31	158.05	157.76	5.19815	5.19821	1620	55	7.39018
162-982B-16H-4-A 32	143.32	158.06	157.77	5.19832	5.19838	1637	44	7.40062
162-982B-16H-4-A 34	143.34	158.08	157.79	5.19866	5.1987	1755	-3	7.47022
162-982B-16H-4-A 36	143.36	158.1	157.81	5.19899	5.19903	1645	52	7.4055
162-982B-16H-4-A 39.5	143.4	158.14	157.85	5.19966	5.19969	1606	36	7.3815
162-982B-16H-4-A 41	143.41	158.15	157.86	5.19983	5.19985	1697	19	7.43662
162-982B-16H-4-A 42	143.42	158.16	157.87	5.2	5.20002	1590	80	7.37149
162-982B-16H-4-A 44	143.44	158.18	157.89	5.20033	5.20034	1684	47	7.42893
162-982B-16H-4-A 46	143.46	158.2	157.91	5.20066	5.20067	1697	81	7.43662
162-982B-16H-4-A 50	143.5	158.24	157.95	5.20145	5.20145	1618	41	7.38895
162-982B-16H-4-A 51	143.51	158.25	157.96	5.20168	5.20168	1743	28	7.46336
162-982B-16H-4-A 53	143.53	158.27	157.98	5.20213	5.20213	1571	7	7.35947
162-982B-16H-4-A 54	143.54	158.28	157.99	5.20235	5.20235	1751	61	7.46794
162-982B-16H-4-A 56	143.56	158.3	158.01	5.2028	5.2028	1795	38	7.49276
162-982B-16H-4-A 60	143.6	158.34	158.05	5.20371	5.20371	2005	38	7.6034
162-982B-16H-4-A 63	143.63	158.37	158.08	5.20438	5.20438	1792	52	7.49109
162-982B-16H-4-A 64	143.64	158.38	158.09	5.20461	5.20461	1884	72	7.54115
162-982B-16H-4-A 65	143.65	158.39	158.1	5.20483	5.20483	1723	50	7.45182
162-982B-16H-4-A 71	143.71	158.45	158.16	5.20619	5.20619	1802	26	7.49665
162-982B-16H-4-A 72	143.72	158.46	158.17	5.20641	5.20641	1658	34	7.41337
162-982B-16H-4-A 74	143.74	158.48	158.19	5.20686	5.20686	1665	66	7.41758
162-982B-16H-4-A 75.5	143.76	158.5	158.21	5.20732	5.20732	1904	88	7.55171
162-982B-16H-4-A 79.5	143.8	158.54	158.25	5.20822	5.20822	1947	62	7.57405
162-982B-16H-4-A 80.5	143.81	158.55	158.26	5.20844	5.20844	1756	39	7.47079
162-982B-16H-4-A 83	143.83	158.57	158.28	5.20889	5.20889	1948	6	7.57456
162-982B-16H-4-A 84	143.84	158.58	158.29	5.20912	5.20912	1866	52	7.53155
162-982B-16H-4-A 85	143.85	158.59	158.3	5.20935	5.20935	2000	53	7.6009
162-982B-16H-4-A 89.5	143.9	158.64	158.35	5.21047	5.21047	1919	44	7.55956
162-982B-16H-4-A 91	143.91	158.65	158.36	5.2107	5.2107	1642	6	7.40367
162-982B-16H-4-A 92	143.92	158.66	158.37	5.21092	5.21092	1820	28	7.50659
162-982B-16H-4-A 94	143.94	158.68	158.39	5.21138	5.21138	1871	43	7.53423
162-982B-16H-4-A 95	143.95	158.69	158.4	5.2116	5.2116	1772	61	7.47986
162-982B-16H-4-A 96	143.96	158.7	158.41	5.21183	5.21183	1682	23	7.42774
162-982B-16H-4-A 99.5	144	158.74	158.45	5.21273	5.21273	1714	47	7.44659
162-982B-16H-4-A 101	144.01	158.75	158.46	5.21295	5.21295	1903	50	7.55119
162-982B-16H-4-A 102	144.02	158.76	158.47	5.21318	5.21318	1997	69	7.5994
162-982B-16H-4-A 104	144.04	158.78	158.49	5.21363	5.21363	2241	42	7.71468
162-982B-16H-4-A 105.5	144.06	158.8	158.51	5.21408	5.21408	2152	30	7.67415
162-982B-16H-4-A 109.5	144.1	158.84	158.55	5.21498	5.21498	2348	58	7.76132
162-982B-16H-4-A 111	144.11	158.85	158.56	5.21521	5.21521	2276	80	7.73018
162-982B-16H-4-A 112	144.12	158.86	158.57	5.21544	5.21544	2429	38	7.79524
162-982B-16H-4-A 113	144.13	158.87	158.58	5.21566	5.21566	2264	50	7.72489
162-982B-16H-4-A 115	144.15	158.89	158.6	5.21611	5.21611	2410	48	7.78738
162-982B-16H-4-A 116	144.16	158.9	158.61	5.21634	5.21634	2434	66	7.79729
162-982B-16H-4-A 119.5	144.2	158.94	158.65	5.21724	5.21724	2250	69	7.71869
162-982B-16H-4-A 121	144.21	158.95	158.66	5.21747	5.21747	2129	27	7.66341
162-982B-16H-4-A 122	144.22	158.96	158.67	5.21769	5.21769	2212	22	7.70165
162-982B-16H-4-A 123	144.23	158.97	158.68	5.21792	5.21792	2399	35	7.78281
162-982B-16H-4-A 126	144.26	159	158.71	5.21859	5.21859	2450	82	7.80384
162-982B-16H-4-A 129.5	144.3	159.04	158.75	5.2195	5.2195	2126	86	7.662
162-982B-16H-4-A 131	144.31	159.05	158.76	5.21972	5.21972	2524	75	7.8336
162-982B-16H-4-A 132	144.32	159.06	158.77	5.21995	5.21995	2870	33	7.96207
162-982B-16H-4-A 134	144.34	159.08	158.79	5.2204	5.2204	2404	83	7.78489
162-982B-16H-4-A 135	144.35	159.09	158.8	5.22062	5.22062	2467	48	7.81076
162-982B-16H-4-A 136	144.36	159.1	158.81	5.22085	5.22085	2625	60	7.87284
162-982B-16H-4-A 140	144.4	159.14	158.85	5.22175	5.22175	2626	28	7.87322
162-982B-16H-4-A 141	144.41	159.15	158.86	5.22198	5.22198	2558	37	7.84698
162-982B-16H-4-A 142	144.42	159.16	158.87	5.2222	5.2222	2742	86	7.91644
162-982B-16H-4-A 144.5	144.45	159.19	158.9	5.22288	5.22288	2709	78	7.90434
162-982B-16H-5-A 2	144.52	159.26	158.97	5.22446	5.22446	2465	58	7.80995
162-982B-16H-5-A 4	144.54	159.28	158.99	5.22491	5.22491	2497	31	7.82285
162-982B-16H-5-A 5	144.55	159.29	159	5.22514	5.22514	2720	26	7.90839
162-982B-16H-5-A 10	144.6	159.34	159.05	5.22626	5.22626	2486	38	7.81843
162-982B-16H-5-A 12	144.62	159.36	159.07	5.22671	5.22671	2389	66	7.77863
162-982B-16H-5-A 14	144.64	159.38	159.09	5.22717	5.22717	2310	22	7.745
162-982B-16H-5-A 15	144.65	159.39	159.1	5.22739	5.22739	2400	19	7.78322
162-982B-16H-5-A 19.5	144.7	159.44	159.15	5.22852	5.22852	2184	53	7.68891
162-982B-16H-5-A 21	144.71	159.45	159.16	5.22874	5.22874	2296	41	7.73892
162-982B-16H-5-A 22	144.72	159.46	159.17	5.22897	5.22897	2113	41	7.65586
162-982B-16H-5-A 24	144.74	159.48	159.19	5.22942	5.22942	2121	16	7.65964
162-982B-16H-5-A 25	144.75	159.49	159.2	5.22965	5.22965	2301	37	7.7411
162-982B-16H-5-A 29.5	144.8	159.54	159.25	5.23077	5.23077	2171	31	7.68294
162-982B-16H-5-A 30	144.8	159.54	159.25	5.23077	5.23077	2181	38	7.68754
162-982B-16H-5-A 31	144.81	159.55	159.26	5.231	5.231	2386	57	7.77737
162-982B-16H-5-A 32	144.82	159.56	159.27	5.23123	5.23123	2084	78	7.64204
162-982B-16H-5-A 33	144.83	159.57	159.28	5.23145	5.23145	2029	49	7.6153
162-982B-16H-5-A 39.5	144.9	159.64	159.35	5.23303	5.23303	2125	38	7.66153
162-982B-16H-5-A 40	144.9	159.64	159.35	5.23303	5.23303	2211	41	7.7012
162-982B-16H-5-A 41	144.91	159.65	159.36	5.23326	5.23326	2110	61	7.65444
162-982B-16H-5-A 42	144.92	159.66	159.37	5.23348	5.23348	2329	48	7.75319
162-982B-16H-5-A 43	144.93	159.67	159.38	5.23371	5.23371	2277	48	7.73061
162-982B-16H-5-A 45	144.95	159.69	159.4	5.23416	5.23416	2488	71	7.81923
162-982B-16H-5-A 49.5	145	159.74	159.45	5.23529	5.23529	2380	66	7.77486
162-982B-16H-5-A 51	145.01	159.75	159.46	5.23551	5.23551	2298	42	7.73979
162-982B-16H-5-A 52	145.02	159.76	159.47	5.23574	5.23574	2446	64	7.80221
162-982B-16H-5-A 54	145.04	159.78	159.49	5.23619	5.23619	2342	77	7.75876
162-982B-16H-5-A 55.5	145.06	159.8	159.51	5.23664	5.23664	2362	55	7.76726
162-982B-16H-5-A 59.5	145.1	159.84	159.55	5.23754	5.23754	2090	40	7.64492
162-982B-16H-5-A 61	145.11	159.85	159.56	5.23777	5.23777	2171	22	7.68294
162-982B-16H-5-A 62	145.12	159.86	159.57	5.23799	5.23799	2121	53	7.65964
162-982B-16H-5-A 64	145.14	159.88	159.59	5.23844	5.23844	2257	52	7.72179
162-982B-16H-5-A 65	145.15	159.89	159.6	5.23867	5.23867	1892	59	7.54539
162-982B-16H-5-A 66	145.16	159.9	159.61	5.23889	5.23889	2050	30	7.6256
162-982B-16H-5-A 71	145.21	159.95	159.66	5.24002	5.24002	1756	86	7.47079
162-982B-16H-5-A 72	145.22	159.96	159.67	5.24025	5.24025	1988	81	7.59488
162-982B-16H-5-A 74	145.24	159.98	159.69	5.2407	5.2407	1572	41	7.3601
162-982B-16H-5-A 76	145.26	160	159.71	5.24115	5.24115	1797	26	7.49387
162-982B-16H-5-A 79.5	145.3	160.04	159.75	5.24205	5.24205	1646	59	7.4061
162-982B-16H-5-A 81	145.31	160.05	159.76	5.24228	5.24228	1904	24	7.55171
162-982B-16H-5-A 82	145.32	160.06	159.77	5.2425	5.2425	1755	48	7.47022
162-982B-16H-5-A 84	145.34	160.08	159.79	5.24295	5.24295	1829	53	7.51152
162-982B-16H-5-A 85	145.35	160.09	159.8	5.24318	5.24318	1755	19	7.47022
162-982B-16H-5-A 89.5	145.4	160.14	159.85	5.24431	5.24431	1889	74	7.5438
162-982B-16H-5-A 91	145.41	160.15	159.86	5.24453	5.24453	1767	56	7.47704
162-982B-16H-5-A 92	145.42	160.16	159.87	5.24476	5.24476	1802	64	7.49665
162-982B-16H-5-A 94	145.44	160.18	159.89	5.24521	5.24521	1880	37	7.53903
162-982B-16H-5-A 96	145.46	160.2	159.91	5.24566	5.24566	1901	33	7.55014
162-982B-16H-5-A 100	145.5	160.24	159.95	5.24656	5.24656	1635	44	7.3994
162-982B-16H-5-A 101	145.51	160.25	159.96	5.24679	5.24679	1901	30	7.55014
162-982B-16H-5-A 102	145.52	160.26	159.97	5.24701	5.24701	1830	31	7.51207
162-982B-16H-5-A 104	145.54	160.28	159.99	5.24747	5.24747	1860	86	7.52833
162-982B-16H-5-A 105	145.55	160.29	160	5.24769	5.24769	1853	34	7.52456
162-982B-16H-5-A 110	145.6	160.34	160.05	5.24882	5.24882	1767	13	7.47704
162-982B-16H-5-A 111	145.61	160.35	160.06	5.24904	5.24904	1958	52	7.57968
162-982B-16H-5-A 112	145.62	160.36	160.07	5.24927	5.24927	1801	56	7.4961
162-982B-16H-5-A 114	145.64	160.38	160.09	5.24972	5.24972	1978	38	7.58984
162-982B-16H-5-A 115.5	145.66	160.4	160.11	5.25017	5.25017	1943	61	7.57199
162-982B-16H-5-A 121	145.71	160.45	160.16	5.2513	5.2513	1907	62	7.55329
162-982B-16H-5-A 122	145.72	160.46	160.17	5.25153	5.25153	1924	67	7.56216
162-982B-16H-5-A 123	145.73	160.47	160.18	5.25175	5.25175	1916	81	7.55799
162-982B-16H-5-A 129.5	145.8	160.54	160.25	5.25333	5.25333	1784	-10	7.48661
162-982B-16H-5-A 131	145.81	160.55	160.26	5.25356	5.25356	1690	62	7.43248
162-982B-16H-5-A 132	145.82	160.56	160.27	5.25378	5.25378	1755	25	7.47022
162-982B-16H-5-A 134	145.84	160.58	160.29	5.25423	5.25423	1901	54	7.55014
162-982B-16H-5-A 135.5	145.86	160.6	160.31	5.25468	5.25468	1742	27	7.46279
162-982B-16H-5-A 139.5	145.9	160.64	160.35	5.25559	5.25559	1973	36	7.58731
162-982B-16H-5-A 141	145.91	160.65	160.36	5.25581	5.25581	1969	39	7.58528
162-982B-16H-5-A 142	145.92	160.66	160.37	5.25604	5.25604	1985	66	7.59337
162-982B-16H-5-A 144	145.94	160.68	160.39	5.25649	5.25649	1928	45	7.56424
162-982B-16H-5-A 145.5	145.96	160.7	160.41	5.25694	5.25694	1969	40	7.58528
162-982B-16H-6-A 2	146.02	160.76	160.47	5.25829	5.25829	1996	41	7.5989
162-982B-16H-6-A 4	146.04	160.78	160.49	5.25874	5.25874	2015	47	7.60837
162-982B-16H-6-A 5	146.05	160.79	160.5	5.25897	5.25897	2056	62	7.62852
162-982B-16H-6-A 10	146.1	160.84	160.55	5.2601	5.2601	2441	64	7.80016
162-982B-16H-6-A 13	146.13	160.87	160.58	5.26077	5.26077	2236	44	7.71244
162-982B-16H-6-A 14	146.14	160.88	160.59	5.261	5.261	1978	33	7.58984
162-982B-16H-6-A 15	146.15	160.89	160.6	5.26123	5.26123	2180	47	7.68708
162-982B-16H-6-A 19.5	146.2	160.94	160.65	5.26235	5.26235	2130	75	7.66388
162-982B-16H-6-A 21	146.21	160.95	160.66	5.26258	5.26258	2436	66	7.79811
162-982B-16H-6-A 23	146.23	160.97	160.68	5.26303	5.26303	2039	34	7.62021
162-982B-16H-6-A 24	146.24	160.98	160.69	5.26326	5.26326	2068	55	7.63434
162-982B-16H-6-A 25	146.25	160.99	160.7	5.26348	5.26348	2148	77	7.67229
162-982B-16H-6-A 30	146.3	161.04	160.75	5.26461	5.26461	1992	52	7.59689
162-982B-16H-6-A 32	146.32	161.06	160.77	5.26506	5.26506	2098	36	7.64874
162-982B-16H-6-A 34	146.34	161.08	160.79	5.26551	5.26551	1928	34	7.56424
162-982B-16H-6-A 36	146.36	161.1	160.81	5.26596	5.26596	1770	33	7.47873
162-982B-16H-6-A 41	146.41	161.15	160.86	5.26709	5.26709	1867	7	7.53209
162-982B-16H-6-A 42	146.42	161.16	160.87	5.26732	5.26732	1854	37	7.5251
162-982B-16H-6-A 44	146.44	161.18	160.89	5.26777	5.26777	1629	55	7.39572
162-982B-16H-6-A 45	146.45	161.19	160.9	5.26799	5.26799	1766	37	7.47647
162-982B-16H-6-A 49.5	146.5	161.24	160.95	5.26912	5.26912	1628	50	7.39511
162-982B-16H-6-A 51	146.51	161.25	160.96	5.26935	5.26935	1741	31	7.46221
162-982B-16H-6-A 53	146.53	161.27	160.98	5.2698	5.2698	1759	2	7.4725
162-982B-16H-6-A 54	146.54	161.28	160.99	5.27002	5.27002	1737	30	7.45991
162-982B-16H-6-A 55	146.55	161.29	161	5.27025	5.27025	1815	23	7.50384
162-982B-16H-6-A 62	146.62	161.36	161.07	5.27183	5.27183	1965	38	7.58325
162-982B-16H-6-A 65	146.65	161.39	161.1	5.2725	5.2725	1819	56	7.50604
162-982B-16H-6-A 66	146.66	161.4	161.11	5.27273	5.27273	1912	55	7.5559
162-982B-16H-6-A 67	146.67	161.41	161.12	5.27295	5.27295	1810	27	7.50108
162-982B-16H-6-A 70	146.7	161.44	161.15	5.27363	5.27363	2159	52	7.6774
162-982B-16H-6-A 71	146.71	161.45	161.16	5.27386	5.27386	1908	63	7.55381
162-982B-16H-6-A 74	146.74	161.48	161.19	5.27453	5.27453	1951	60	7.5761
162-982B-16H-6-A 76	146.76	161.5	161.21	5.27499	5.27499	1919	58	7.55956
162-982B-16H-6-A 77	146.77	161.51	161.22	5.27521	5.27521	2026	57	7.61382
162-982B-16H-6-A 80	146.8	161.54	161.25	5.27589	5.27589	1946	45	7.57353
162-982B-16H-6-A 82	146.82	161.56	161.27	5.27634	5.27634	1926	52	7.5632
162-982A-16H-2-A 63	143.33	161.45	161.3	5.27702	5.27702	2177	68	7.6857
162-982A-16H-2-A 64	143.34	161.46	161.31	5.27724	5.27724	2047	48	7.62413
162-982A-16H-2-A 66	143.36	161.48	161.33	5.27769	5.27769	1825	19	7.50934
162-982A-16H-2-A 68	143.38	161.5	161.35	5.27814	5.27814	1840	45	7.51752
162-982A-16H-2-A 70	143.4	161.52	161.37	5.27859	5.27859	1850	74	7.52294
162-982A-16H-2-A 72	143.42	161.54	161.39	5.27905	5.27905	1736	40	7.45934
162-982A-16H-2-A 73	143.43	161.55	161.4	5.27927	5.27927	1639	42	7.40184
162-982A-16H-2-A 77	143.47	161.59	161.44	5.28017	5.28017	1832	19	7.51316
162-982A-16H-2-A 78	143.48	161.6	161.45	5.2804	5.2804	1639	60	7.40184
162-982A-16H-2-A 80	143.5	161.62	161.47	5.28085	5.28085	1841	47	7.51806
162-982A-16H-2-A 83	143.53	161.65	161.5	5.28153	5.28153	1736	21	7.45934
162-982A-16H-2-A 84	143.54	161.66	161.51	5.28175	5.28175	1732	41	7.45703
162-982A-16H-2-A 86	143.56	161.68	161.53	5.2822	5.2822	1979	48	7.59035
162-982A-16H-2-A 88	143.58	161.7	161.55	5.28265	5.28265	2086	66	7.643
162-982A-16H-2-A 89	143.59	161.71	161.56	5.28288	5.28288	1881	50	7.53956
162-982A-16H-2-A 97	143.67	161.79	161.64	5.28468	5.28468	2579	65	7.85516
162-982A-16H-2-A 98	143.68	161.8	161.65	5.28491	5.28491	2484	22	7.81763
162-982A-16H-2-A 100	143.7	161.82	161.67	5.28536	5.28536	2324	51	7.75105
162-982A-16H-2-A 103	143.73	161.85	161.7	5.28604	5.28604	2339	34	7.75748
162-982A-16H-2-A 104	143.74	161.86	161.71	5.28626	5.28626	2314	12	7.74673
162-982A-16H-2-A 106	143.76	161.88	161.73	5.28671	5.28671	2402	93	7.78406
162-982A-16H-2-A 109	143.79	161.91	161.76	5.28739	5.28739	2498	52	7.82325
162-982A-16H-2-A 110	143.8	161.92	161.77	5.28762	5.28762	2618	51	7.87017
162-982A-16H-2-A 112	143.82	161.94	161.79	5.28807	5.28807	2634	68	7.87626
162-982A-16H-2-A 114	143.84	161.96	161.81	5.28852	5.28852	2415	47	7.78945
162-982A-16H-2-A 116	143.86	161.98	161.83	5.28897	5.28897	2429	25	7.79524
162-982A-16H-2-A 117	143.87	161.99	161.84	5.2892	5.2892	2493	12	7.82124
162-982A-16H-2-A 121	143.91	162.03	161.88	5.2901	5.2901	2153	54	7.67462
162-982A-16H-2-A 122	143.92	162.04	161.89	5.29032	5.29032	2204	114	7.69803
162-982A-16H-2-A 124	143.94	162.06	161.91	5.29077	5.29077	2201	47	7.69667
162-982A-16H-2-A 126	143.96	162.08	161.93	5.29123	5.29123	2281	72	7.73237
162-982A-16H-2-A 127	143.97	162.09	161.94	5.29145	5.29145	2119	41	7.6587
162-982A-16H-2-A 130	144	162.12	161.97	5.29213	5.29213	2263	57	7.72445
162-982A-16H-2-A 132	144.02	162.14	161.99	5.29258	5.29258	2129	28	7.66341
162-982A-16H-2-A 134	144.04	162.16	162.01	5.29303	5.29303	2097	65	7.64826
162-982A-16H-2-A 135	144.05	162.17	162.02	5.29326	5.29326	2070	51	7.6353
162-982A-16H-2-A 138	144.08	162.2	162.05	5.29393	5.29393	2174	44	7.68432
162-982A-16H-2-A 141	144.11	162.23	162.08	5.29461	5.29461	2237	32	7.71289
162-982A-16H-2-A 142	144.12	162.24	162.09	5.29483	5.29483	2282	12	7.73281
162-982A-16H-2-A 145	144.15	162.27	162.12	5.29551	5.29551	2044	42	7.62266
162-982A-16H-2-A 146	144.16	162.28	162.13	5.29574	5.29574	2265	72	7.72533
162-982A-16H-2-A 148	144.18	162.3	162.15	5.29619	5.29619	2461	69	7.80832
162-982A-16H-2-A 149	144.19	162.31	162.16	5.29641	5.29641	2140	10	7.66856
162-982A-16H-3-A 2	144.22	162.34	162.19	5.29709	5.29709	2466	50	7.81035
162-982A-16H-3-A 4	144.24	162.36	162.21	5.29754	5.29754	2379	41	7.77444
162-982A-16H-3-A 7	144.27	162.39	162.24	5.29822	5.29822	2365	72	7.76853
162-982A-16H-3-A 8	144.28	162.4	162.25	5.29844	5.29844	2313	75	7.7463
162-982A-16H-3-A 9	144.29	162.41	162.26	5.29867	5.29867	2302	83	7.74153
162-982A-16H-3-A 12	144.32	162.44	162.29	5.29935	5.29935	2200	74	7.69621
162-982A-16H-3-A 14	144.34	162.46	162.31	5.2998	5.2998	2060	36	7.63046
162-982A-16H-3-A 15	144.35	162.47	162.32	5.30002	5.30002	1961	72	7.58121
162-982A-16H-3-A 18	144.38	162.5	162.35	5.3007	5.3007	1917	56	7.55852
162-982A-16H-3-A 19	144.39	162.51	162.36	5.30092	5.30092	2013	72	7.60738
162-982A-16H-3-A 22	144.42	162.54	162.39	5.3016	5.3016	2039	53	7.62021
162-982A-16H-3-A 23	144.43	162.55	162.4	5.30183	5.30183	2019	72	7.61036
162-982A-16H-3-A 26	144.46	162.58	162.43	5.3025	5.3025	2372	89	7.77149
162-982A-16H-3-A 28	144.48	162.6	162.45	5.30295	5.30295	2478	46	7.81521
162-982A-16H-3-A 31	144.51	162.63	162.48	5.30363	5.30363	2090	52	7.64492
162-982A-16H-3-A 32	144.52	162.64	162.49	5.30386	5.30386	2241	76	7.71468
162-982A-16H-3-A 33	144.53	162.65	162.5	5.30408	5.30408	2171	87	7.68294
162-982A-16H-3-A 36	144.56	162.68	162.53	5.30476	5.30476	2490	14	7.82004
162-982A-16H-3-A 38	144.58	162.7	162.55	5.30521	5.30521	2381	92	7.77528
162-982A-16H-3-A 41	144.61	162.73	162.58	5.30589	5.30589	2329	46	7.75319
162-982A-16H-3-A 42	144.62	162.74	162.59	5.30611	5.30611	2434	29	7.79729
162-982A-16H-3-A 43	144.63	162.75	162.6	5.30634	5.30634	2489	52	7.81964
162-982A-16H-3-A 44	144.64	162.76	162.61	5.30656	5.30656	2584	78	7.85709
162-982A-16H-3-A 46	144.66	162.78	162.63	5.30701	5.30701	2274	59	7.7293
162-982A-16H-3-A 49	144.69	162.81	162.66	5.30769	5.30769	2446	78	7.80221
162-982A-16H-3-A 50	144.7	162.82	162.67	5.30792	5.30792	2409	68	7.78697
162-982A-16H-3-A 52	144.72	162.84	162.69	5.30837	5.30837	2257	47	7.72179
162-982A-16H-3-A 53	144.73	162.85	162.7	5.30859	5.30859	2217	74	7.70391
162-982A-16H-3-A 56	144.76	162.88	162.73	5.30927	5.30927	2158	61	7.67694
162-982A-16H-3-A 58	144.78	162.9	162.75	5.30972	5.30972	2037	58	7.61923
162-982A-16H-3-A 60	144.8	162.92	162.77	5.31017	5.31017	2046	55	7.62364
162-982A-16H-3-A 63	144.83	162.95	162.8	5.31085	5.31085	2011	83	7.60639
162-982A-16H-3-A 64	144.84	162.96	162.81	5.31108	5.31108	1969	50	7.58528
162-982A-16H-3-A 66	144.86	162.98	162.83	5.31153	5.31153	1970	19	7.58579
162-982A-16H-3-A 67	144.87	162.99	162.84	5.31175	5.31175	2152	76	7.67415
162-982A-16H-3-A 70	144.9	163.02	162.87	5.31243	5.31243	2039	73	7.62021
162-982A-16H-3-A 71	144.91	163.03	162.88	5.31265	5.31265	1983	57	7.59237
162-982A-16H-3-A 74	144.94	163.06	162.91	5.31333	5.31333	2030	52	7.61579
162-982A-16H-3-A 75	144.95	163.07	162.92	5.31356	5.31356	1966	25	7.58376
162-982A-16H-3-A 78	144.98	163.1	162.95	5.31423	5.31423	1938	20	7.56941
162-982A-16H-3-A 79	144.99	163.11	162.96	5.31446	5.31446	2144	81	7.67043
162-982A-16H-3-A 82	145.02	163.14	162.99	5.31514	5.31514	2116	63	7.65728
162-982A-16H-3-A 85	145.05	163.17	163.02	5.31581	5.31581	1869	71	7.53316
162-982A-16H-3-A 86	145.06	163.18	163.03	5.31604	5.31604	2086	35	7.643
162-982A-16H-3-A 88	145.08	163.2	163.05	5.31649	5.31649	2144	48	7.67043
162-982A-16H-3-A 89	145.09	163.21	163.06	5.31671	5.31671	1989	35	7.59539
162-982A-16H-3-A 92	145.12	163.24	163.09	5.31739	5.31739	1967	55	7.58426
162-982A-16H-3-A 94	145.14	163.26	163.11	5.31784	5.31784	2049	45	7.62511
[truncated: 5,505 more rows]

## Sheet: Site 982 XRF data Hole A
IODP ID	mbsf	mcd (shipboard)	rmcd (this study)	AgeD17MT (this study)	AgeD17FT (this study)	Silica (counts)	Zirconium (counts)	ln(Silica) (counts)
162-982A-12H-3-A 2	106.22	119.71	119.71	4.46702	4.46702	1738	61	7.46049
162-982A-12H-3-A 3	106.23	119.72	119.72	4.4673	4.4673	1907	34	7.55329
162-982A-12H-3-A 6	106.26	119.75	119.75	4.46812	4.46812	1835	38	7.5148
162-982A-12H-3-A 7	106.27	119.76	119.76	4.4684	4.4684	1817	41	7.50494
162-982A-12H-3-A 8	106.28	119.77	119.77	4.46868	4.46868	1832	111	7.51316
162-982A-12H-3-A 9	106.29	119.78	119.78	4.46895	4.46895	1767	42	7.47704
162-982A-12H-3-A 12	106.32	119.81	119.81	4.46978	4.46978	2006	79	7.6039
162-982A-12H-3-A 14	106.34	119.83	119.83	4.47033	4.47033	1928	49	7.56424
162-982A-12H-3-A 15	106.35	119.84	119.84	4.47061	4.47061	2136	22	7.66669
162-982A-12H-3-A 18	106.38	119.87	119.87	4.47143	4.47143	2060	19	7.63046
162-982A-12H-3-A 19	106.39	119.88	119.88	4.47171	4.47171	1916	41	7.55799
162-982A-12H-3-A 22	106.42	119.91	119.91	4.47253	4.47253	2107	62	7.65302
162-982A-12H-3-A 24	106.44	119.93	119.93	4.47309	4.47309	2191	69	7.69211
162-982A-12H-3-A 26	106.46	119.95	119.95	4.47364	4.47364	2201	75	7.69667
162-982A-12H-3-A 28.5	106.49	119.98	119.98	4.47446	4.47446	2288	60	7.73543
162-982A-12H-3-A 31	106.51	120	120	4.47502	4.47502	2074	31	7.63723
162-982A-12H-3-A 33	106.53	120.02	120.02	4.47557	4.47557	1822	24	7.50769
162-982A-12H-3-A 34	106.54	120.03	120.03	4.47584	4.47584	1900	16	7.54961
162-982A-12H-3-A 37	106.57	120.06	120.06	4.47667	4.47667	1652	18	7.40974
162-982A-12H-3-A 39	106.59	120.08	120.08	4.47722	4.47722	1759	47	7.4725
162-982A-12H-3-A 40	106.6	120.09	120.09	4.4775	4.4775	1483	52	7.30182
162-982A-12H-3-A 41	106.61	120.1	120.1	4.47777	4.47777	1131	91	7.03086
162-982A-12H-3-A 44	106.64	120.13	120.13	4.4786	4.4786	1320	10	7.18539
162-982A-12H-3-A 46	106.66	120.15	120.15	4.47915	4.47915	1528	66	7.33171
162-982A-12H-3-A 48.5	106.69	120.18	120.18	4.47998	4.47998	1212	59	7.10003
162-982A-12H-3-A 51	106.71	120.2	120.2	4.48053	4.48053	1237	25	7.12044
162-982A-12H-3-A 54	106.74	120.23	120.23	4.48135	4.48135	1196	118	7.08674
162-982A-12H-3-A 57	106.77	120.26	120.26	4.48218	4.48218	1151	72	7.04839
162-982A-12H-3-A 59	106.79	120.28	120.28	4.48273	4.48273	1066	52	6.97167
162-982A-12H-3-A 60	106.8	120.29	120.29	4.48301	4.48301	917	42	6.82111
162-982A-12H-3-A 62	106.82	120.31	120.31	4.48356	4.48356	1173	42	7.06732
162-982A-12H-3-A 64	106.84	120.33	120.33	4.48411	4.48411	1208	24	7.09672
162-982A-12H-3-A 65	106.85	120.34	120.34	4.48439	4.48439	1329	24	7.19218
162-982A-12H-3-A 67.5	106.88	120.37	120.37	4.48521	4.48521	1209	55	7.09755
162-982A-12H-3-A 70	106.9	120.39	120.39	4.48576	4.48576	1223	45	7.10906
162-982A-12H-3-A 72	106.92	120.41	120.41	4.48632	4.48632	1245	28	7.12689
162-982A-12H-3-A 73	106.93	120.42	120.42	4.48659	4.48659	1203	22	7.09257
162-982A-12H-3-A 77	106.97	120.46	120.46	4.48769	4.48769	1326	28	7.18992
162-982A-12H-3-A 79	106.99	120.48	120.48	4.48825	4.48825	1281	113	7.1554
162-982A-12H-3-A 81	107.01	120.5	120.5	4.4888	4.4888	1123	37	7.02376
162-982A-12H-3-A 82	107.02	120.51	120.51	4.48907	4.48907	1266	80	7.14362
162-982A-12H-3-A 84	107.04	120.53	120.53	4.48962	4.48962	1099	8	7.00216
162-982A-12H-3-A 90	107.1	120.59	120.59	4.49128	4.49128	1091	53	6.99485
162-982A-12H-3-A 91	107.11	120.6	120.6	4.49155	4.49155	1121	19	7.02198
162-982A-12H-3-A 92	107.12	120.61	120.61	4.49183	4.49183	1107	6	7.00941
162-982A-12H-3-A 93	107.13	120.62	120.62	4.4921	4.4921	1231	47	7.11558
162-982A-12H-3-A 95	107.15	120.64	120.64	4.49266	4.49266	1025	50	6.93245
162-982A-12H-3-A 100	107.2	120.69	120.69	4.49403	4.49403	1152	24	7.04925
162-982A-12H-3-A 102	107.22	120.71	120.71	4.49458	4.49458	1277	24	7.15227
162-982A-12H-3-A 103	107.23	120.72	120.72	4.49486	4.49486	1219	64	7.10579
162-982A-12H-3-A 105	107.25	120.74	120.74	4.49541	4.49541	1084	52	6.98841
162-982A-12H-3-A 109	107.29	120.78	120.78	4.49651	4.49651	1051	50	6.9575
162-982A-12H-3-A 110	107.3	120.79	120.79	4.49679	4.49679	1035	74	6.94216
162-982A-12H-3-A 112	107.32	120.81	120.81	4.49734	4.49734	1114	85	7.01571
162-982A-12H-3-A 114	107.34	120.83	120.83	4.49789	4.49789	1025	32	6.93245
162-982A-12H-3-A 119	107.39	120.88	120.88	4.49927	4.49927	1080	16	6.98472
162-982A-12H-3-A 120	107.4	120.89	120.89	4.49955	4.49955	918	27	6.8222
162-982A-12H-3-A 122	107.42	120.91	120.91	4.5001	4.5001	1051	70	6.9575
162-982A-12H-3-A 123	107.43	120.92	120.92	4.50037	4.50037	1029	47	6.93634
162-982A-12H-3-A 125	107.45	120.94	120.94	4.50092	4.50092	1126	50	7.02643
162-982A-12H-3-A 128	107.48	120.97	120.97	4.50175	4.50175	1153	50	7.05012
162-982A-12H-3-A 130	107.5	120.99	120.99	4.5023	4.5023	1190	24	7.08171
162-982A-12H-3-A 131	107.51	121	121	4.50258	4.50258	1225	0	7.1107
162-982A-12H-3-A 132	107.52	121.01	121.01	4.50285	4.50285	1493	72	7.30854
162-982A-12H-3-A 134	107.54	121.03	121.03	4.50341	4.50341	1070	28	6.97541
162-982A-12H-3-A 136	107.56	121.05	121.05	4.50396	4.50396	1229	65	7.11396
162-982A-12H-3-A 138	107.58	121.07	121.07	4.50451	4.50451	976	44	6.88346
162-982A-12H-3-A 140	107.6	121.09	121.09	4.50506	4.50506	1246	66	7.12769
162-982A-12H-3-A 142	107.62	121.11	121.11	4.50561	4.50561	1163	62	7.05876
162-982A-12H-3-A 145	107.65	121.14	121.14	4.50644	4.50644	1376	68	7.22694
162-982A-12H-3-A 146	107.66	121.15	121.15	4.50671	4.50671	1290	77	7.1624
162-982A-12H-3-A 149	107.69	121.18	121.18	4.50754	4.50754	1245	63	7.12689
162-982A-12H-4-A 2	107.72	121.21	121.21	4.50837	4.50837	1194	19	7.08506
162-982A-12H-4-A 8.5	107.79	121.28	121.28	4.5103	4.5103	1253	91	7.1333
162-982A-12H-4-A 10.5	107.81	121.3	121.3	4.51085	4.51085	1687	87	7.43071
162-982A-12H-4-A 12.5	107.83	121.32	121.32	4.5114	4.5114	1287	-4	7.16007
162-982A-12H-4-A 14	107.84	121.33	121.33	4.51167	4.51167	1378	48	7.22839
162-982A-12H-4-A 18	107.88	121.37	121.37	4.51278	4.51278	1246	35	7.12769
162-982A-12H-4-A 21	107.91	121.4	121.4	4.5136	4.5136	1377	73	7.22766
162-982A-12H-4-A 22	107.92	121.41	121.41	4.51388	4.51388	1325	24	7.18917
162-982A-12H-4-A 23	107.93	121.42	121.42	4.51415	4.51415	1278	53	7.15305
162-982A-12H-4-A 25	107.95	121.44	121.44	4.51471	4.51471	1396	66	7.24137
162-982A-12H-4-A 26	107.96	121.45	121.45	4.51498	4.51498	1288	35	7.16085
162-982A-12H-4-A 28	107.98	121.47	121.47	4.51553	4.51553	1255	37	7.13489
162-982A-12H-4-A 29	107.99	121.48	121.48	4.51581	4.51581	1331	80	7.19369
162-982A-12H-4-A 30	108	121.49	121.49	4.51608	4.51608	1200	67	7.09008
162-982A-12H-4-A 31	108.01	121.5	121.5	4.51636	4.51636	1342	47	7.20192
162-982A-12H-4-A 33	108.03	121.52	121.52	4.51691	4.51691	1110	22	7.01212
162-982A-12H-4-A 36	108.06	121.55	121.55	4.51774	4.51774	1258	72	7.13728
162-982A-12H-4-A 38	108.08	121.57	121.57	4.51829	4.51829	1039	64	6.94601
162-982A-12H-4-A 40	108.1	121.59	121.59	4.51884	4.51884	1133	80	7.03262
162-982A-12H-4-A 43	108.13	121.62	121.62	4.51967	4.51967	976	28	6.88346
162-982A-12H-4-A 44	108.14	121.63	121.63	4.51994	4.51994	892	-14	6.79347
162-982A-12H-4-A 46	108.16	121.65	121.65	4.52049	4.52049	953	27	6.85961
162-982A-12H-4-A 48	108.18	121.67	121.67	4.52105	4.52105	1021	62	6.92854
162-982A-12H-4-A 51	108.21	121.7	121.7	4.52187	4.52187	1304	90	7.17319
162-982A-12H-4-A 52	108.22	121.71	121.71	4.52215	4.52215	1030	30	6.93731
162-982A-12H-4-A 56	108.26	121.75	121.75	4.52325	4.52325	1162	48	7.0579
162-982A-12H-4-A 59	108.29	121.78	121.78	4.52408	4.52408	939	19	6.84482
162-982A-12H-4-A 60	108.3	121.79	121.79	4.52435	4.52435	1046	18	6.95273
162-982A-12H-4-A 61	108.31	121.8	121.8	4.52463	4.52463	1100	56	7.00307
162-982A-12H-4-A 63	108.33	121.82	121.82	4.52518	4.52518	1153	58	7.05012
162-982A-12H-4-A 65	108.35	121.84	121.84	4.52573	4.52573	1055	30	6.9613
162-982A-12H-4-A 68.5	108.39	121.88	121.88	4.52683	4.52683	1070	40	6.97541
162-982A-12H-4-A 69.5	108.4	121.89	121.89	4.52711	4.52711	1227	38	7.11233
162-982A-12H-4-A 71.5	108.42	121.91	121.91	4.52766	4.52766	1112	54	7.01392
162-982A-12H-4-A 74	108.44	121.93	121.93	4.52821	4.52821	1058	38	6.96414
162-982A-12H-4-A 75	108.45	121.94	121.94	4.52849	4.52849	1201	69	7.09091
162-982A-12H-4-A 78	108.48	121.97	121.97	4.52931	4.52931	1251	72	7.1317
162-982A-12H-4-A 79	108.49	121.98	121.98	4.52959	4.52959	1242	36	7.12448
162-982A-12H-4-A 81.5	108.52	122.01	122.01	4.53042	4.53042	1195	40	7.0859
162-982A-12H-4-A 84	108.54	122.03	122.03	4.53097	4.53097	1264	34	7.14204
162-982A-12H-4-A 89	108.59	122.08	122.08	4.53235	4.53235	1129	72	7.02909
162-982A-12H-4-A 90	108.6	122.09	122.09	4.53262	4.53262	1287	16	7.16007
162-982A-12H-4-A 92	108.62	122.11	122.11	4.53317	4.53317	1332	57	7.19444
162-982A-12H-4-A 93	108.63	122.12	122.12	4.53345	4.53345	1271	72	7.14756
162-982A-12H-4-A 97	108.67	122.16	122.16	4.53455	4.53455	1175	60	7.06902
162-982A-12H-4-A 98	108.68	122.17	122.17	4.53483	4.53483	1252	66	7.1325
162-982A-12H-4-A 100.5	108.71	122.2	122.2	4.53565	4.53565	1195	59	7.0859
162-982A-12H-4-A 101.5	108.72	122.21	122.21	4.53593	4.53593	1506	75	7.31721
162-982A-12H-4-A 103	108.73	122.22	122.22	4.53621	4.53621	1308	69	7.17625
162-982A-12H-4-A 104	108.74	122.23	122.23	4.53648	4.53648	1323	57	7.18766
162-982A-12H-4-A 105.5	108.76	122.25	122.25	4.53703	4.53703	1251	55	7.1317
162-982A-12H-4-A 108	108.78	122.27	122.27	4.53758	4.53758	1258	55	7.13728
162-982A-12H-4-A 110.5	108.81	122.3	122.3	4.53841	4.53841	1306	58	7.17472
162-982A-12H-4-A 111.5	108.82	122.31	122.31	4.53869	4.53869	1373	66	7.22475
162-982A-12H-4-A 113	108.83	122.32	122.32	4.53896	4.53896	1337	60	7.19818
162-982A-12H-4-A 119	108.89	122.38	122.38	4.54062	4.54062	1427	8	7.26333
162-982A-12H-4-A 120	108.9	122.39	122.39	4.54089	4.54089	1370	44	7.22257
162-982A-12H-4-A 121	108.91	122.4	122.4	4.54117	4.54117	1382	27	7.23129
162-982A-12H-4-A 122	108.92	122.41	122.41	4.54144	4.54144	1382	59	7.23129
162-982A-12H-4-A 124	108.94	122.43	122.43	4.54199	4.54199	1552	7	7.3473
162-982A-12H-4-A 125	108.95	122.44	122.44	4.54227	4.54227	1487	33	7.30452
162-982A-12H-4-A 128	108.98	122.47	122.47	4.5431	4.5431	1451	19	7.28001
162-982A-12H-4-A 131	109.01	122.5	122.5	4.54392	4.54392	1671	53	7.42118
162-982A-12H-4-A 132	109.02	122.51	122.51	4.5442	4.5442	1572	72	7.3601
162-982A-12H-4-A 133	109.03	122.52	122.52	4.54447	4.54447	1733	78	7.45761
162-982A-12H-4-A 136	109.06	122.55	122.55	4.5453	4.5453	1529	40	7.33237
162-982A-12H-4-A 140	109.1	122.59	122.59	4.5464	4.5464	1874	86	7.53583
162-982A-12H-4-A 142	109.12	122.61	122.61	4.54695	4.54695	1909	59	7.55433
162-982A-12H-4-A 143	109.13	122.62	122.62	4.54723	4.54723	1932	57	7.56631
162-982A-12H-5-A 2	109.22	122.71	122.71	4.54971	4.54971	1760	41	7.47307
162-982A-12H-5-A 3	109.23	122.72	122.72	4.54999	4.54999	1785	50	7.48717
162-982A-12H-5-A 6	109.26	122.75	122.75	4.55081	4.55081	1522	55	7.32778
162-982A-12H-5-A 9	109.29	122.78	122.78	4.55164	4.55164	1344	51	7.20341
162-982A-12H-5-A 10	109.3	122.79	122.79	4.55192	4.55192	1461	20	7.28688
162-982A-12H-5-A 11	109.31	122.8	122.8	4.55219	4.55219	1341	41	7.20117
162-982A-12H-5-A 13.5	109.34	122.83	122.83	4.55302	4.55302	1262	58	7.14045
162-982A-12H-5-A 16	109.36	122.85	122.85	4.55357	4.55357	1368	47	7.22111
162-982A-12H-5-A 18	109.38	122.87	122.87	4.55412	4.55412	1493	58	7.30854
162-982A-12H-5-A 20	109.4	122.89	122.89	4.55467	4.55467	1339	68	7.19968
162-982A-12H-5-A 22.5	109.43	122.92	122.92	4.5555	4.5555	1289	36	7.16162
162-982A-12H-5-A 24	109.44	122.93	122.93	4.55577	4.55577	1328	61	7.19143
162-982A-12H-5-A 26	109.46	122.95	122.95	4.55633	4.55633	1392	42	7.2385
162-982A-12H-5-A 27	109.47	122.96	122.96	4.5566	4.5566	1523	49	7.32844
162-982A-12H-5-A 29	109.49	122.98	122.98	4.55715	4.55715	1639	72	7.40184
162-982A-12H-5-A 32	109.52	123.01	123.01	4.55798	4.55798	1270	39	7.14677
162-982A-12H-5-A 34	109.54	123.03	123.03	4.55853	4.55853	1328	53	7.19143
162-982A-12H-5-A 35	109.55	123.04	123.04	4.55881	4.55881	1441	54	7.27309
162-982A-12H-5-A 39	109.59	123.08	123.08	4.55991	4.55991	1367	58	7.22037
162-982A-12H-5-A 40	109.6	123.09	123.09	4.56018	4.56018	1511	52	7.32053
162-982A-12H-5-A 41	109.61	123.1	123.1	4.56046	4.56046	1424	78	7.26123
162-982A-12H-5-A 42	109.62	123.11	123.11	4.56074	4.56074	1486	28	7.30384
162-982A-12H-5-A 43	109.63	123.12	123.12	4.56101	4.56101	1261	36	7.13966
162-982A-12H-5-A 45.5	109.66	123.15	123.15	4.56184	4.56184	1415	96	7.25488
162-982A-12H-5-A 48	109.68	123.17	123.17	4.56239	4.56239	1253	86	7.1333
162-982A-12H-5-A 50	109.7	123.19	123.19	4.56294	4.56294	1459	50	7.28551
162-982A-12H-5-A 53	109.73	123.22	123.22	4.56377	4.56377	1125	58	7.02554
162-982A-12H-5-A 54	109.74	123.23	123.23	4.56404	4.56404	1257	43	7.13648
162-982A-12H-5-A 55	109.75	123.24	123.24	4.56432	4.56432	1523	59	7.32844
162-982A-12H-5-A 58	109.78	123.27	123.27	4.56515	4.56515	1276	39	7.15149
162-982A-12H-5-A 59	109.79	123.28	123.28	4.56542	4.56542	1266	24	7.14362
162-982A-12H-5-A 62	109.82	123.31	123.31	4.56625	4.56625	1486	61	7.30384
162-982A-12H-5-A 65	109.85	123.34	123.34	4.56708	4.56708	1081	27	6.98564
162-982A-12H-5-A 66	109.86	123.35	123.35	4.56735	4.56735	1411	22	7.25205
162-982A-12H-5-A 67	109.87	123.36	123.36	4.56763	4.56763	1063	73	6.96885
162-982A-12H-5-A 70	109.9	123.39	123.39	4.56845	4.56845	1089	45	6.99302
162-982A-12H-5-A 71	109.91	123.4	123.4	4.56873	4.56873	1047	30	6.95368
162-982A-12H-5-A 73	109.93	123.42	123.42	4.56928	4.56928	840	24	6.7334
162-982A-12H-5-A 76	109.96	123.45	123.45	4.57011	4.57011	850	33	6.74524
162-982A-12H-5-A 77	109.97	123.46	123.46	4.57038	4.57038	805	47	6.69084
162-982A-12H-5-A 79	109.99	123.48	123.48	4.57093	4.57093	1151	50	7.04839
162-982A-12H-5-A 82	110.02	123.51	123.51	4.57176	4.57176	1183	53	7.07581
162-982A-12H-5-A 83	110.03	123.52	123.52	4.57204	4.57204	1257	48	7.13648
162-982A-12H-5-A 85.5	110.06	123.55	123.55	4.57286	4.57286	1103	59	7.00579
162-982A-12H-5-A 89	110.09	123.58	123.58	4.57369	4.57369	1194	52	7.08506
162-982A-12H-5-A 90	110.1	123.59	123.59	4.57397	4.57397	1430	17	7.26543
162-982A-12H-5-A 92	110.12	123.61	123.61	4.57452	4.57452	1556	64	7.34987
162-982A-12H-5-A 94.5	110.15	123.64	123.64	4.57534	4.57534	1525	44	7.32975
162-982A-12H-5-A 97	110.17	123.66	123.66	4.5759	4.5759	1639	54	7.40184
162-982A-12H-5-A 98	110.18	123.67	123.67	4.57617	4.57617	1406	71	7.2485
162-982A-12H-5-A 100	110.2	123.69	123.69	4.57672	4.57672	1635	67	7.3994
162-982A-12H-5-A 101	110.21	123.7	123.7	4.577	4.577	1617	47	7.38833
162-982A-12H-5-A 106	110.26	123.75	123.75	4.57838	4.57838	1702	40	7.43956
162-982A-12H-5-A 108	110.28	123.77	123.77	4.57893	4.57893	1881	42	7.53956
162-982A-12H-5-A 109	110.29	123.78	123.78	4.5792	4.5792	1833	52	7.51371
162-982A-12H-5-A 112	110.32	123.81	123.81	4.58003	4.58003	1939	41	7.56993
162-982A-12H-5-A 113	110.33	123.82	123.82	4.58031	4.58031	1904	40	7.55171
162-982A-12H-5-A 116	110.36	123.85	123.85	4.58113	4.58113	2094	11	7.64683
162-982A-12H-5-A 118	110.38	123.87	123.87	4.58168	4.58168	2077	47	7.63868
162-982A-12H-5-A 119	110.39	123.88	123.88	4.58196	4.58196	2121	52	7.65964
162-982A-12H-5-A 123	110.43	123.92	123.92	4.58306	4.58306	2187	44	7.69029
162-982A-12H-5-A 124	110.44	123.93	123.93	4.58334	4.58334	2331	72	7.75405
162-982A-12H-5-A 126	110.46	123.95	123.95	4.58389	4.58389	2116	66	7.65728
162-982A-12H-5-A 127	110.47	123.96	123.96	4.58416	4.58416	2256	89	7.72135
162-982A-12H-5-A 128	110.48	123.97	123.97	4.58444	4.58444	2155	48	7.67555
162-982A-12H-5-A 130	110.5	123.99	123.99	4.58499	4.58499	2222	37	7.70616
162-982A-12H-5-A 131	110.51	124	124	4.58527	4.58527	2015	62	7.60837
162-982A-12H-5-A 132	110.52	124.01	124.01	4.58554	4.58554	2055	66	7.62803
162-982A-12H-5-A 134	110.54	124.03	124.03	4.58609	4.58609	1932	41	7.56631
162-982A-12H-5-A 135	110.55	124.04	124.04	4.58637	4.58637	1851	30	7.52348
162-982A-12H-5-A 138	110.58	124.07	124.07	4.5872	4.5872	1870	40	7.53369
162-982A-12H-5-A 140	110.6	124.09	124.09	4.58775	4.58775	1669	50	7.41998
162-982A-12H-5-A 141	110.61	124.1	124.1	4.58802	4.58802	1782	83	7.48549
162-982A-12H-5-A 144	110.64	124.13	124.13	4.58885	4.58885	1734	24	7.45819
162-982A-12H-5-A 146	110.66	124.15	124.15	4.5894	4.5894	1785	73	7.48717
162-982A-13H-1-A 4	112.74	127.66	127.56	4.68339	4.68339	1684	24	7.42893
162-982A-13H-1-A 6	112.76	127.68	127.58	4.68394	4.68394	1510	58	7.31986
162-982A-13H-1-A 8	112.78	127.7	127.6	4.68449	4.68449	1560	94	7.35244
162-982A-13H-1-A 10	112.8	127.72	127.62	4.68505	4.68505	1496	53	7.31055
162-982A-13H-1-A 12	112.82	127.74	127.64	4.6856	4.6856	1875	60	7.53636
162-982A-13H-1-A 14	112.84	127.76	127.66	4.68615	4.68615	1682	50	7.42774
162-982A-13H-1-A 15	112.85	127.77	127.67	4.68642	4.68642	1706	72	7.44191
162-982A-13H-1-A 19	112.89	127.81	127.71	4.68753	4.68753	1490	58	7.30653
162-982A-13H-1-A 20	112.9	127.82	127.72	4.6878	4.6878	1736	48	7.45934
162-982A-13H-1-A 22	112.92	127.84	127.74	4.68835	4.68835	1672	40	7.42178
162-982A-13H-1-A 25	112.95	127.87	127.77	4.68918	4.68918	1529	36	7.33237
162-982A-13H-1-A 26	112.96	127.88	127.78	4.68946	4.68946	1833	54	7.51371
162-982A-13H-1-A 28	112.98	127.9	127.8	4.69001	4.69001	1583	59	7.36708
162-982A-13H-1-A 31	113.01	127.93	127.83	4.69083	4.69083	1413	20	7.25347
162-982A-13H-1-A 32	113.02	127.94	127.84	4.69111	4.69111	1464	77	7.28893
162-982A-13H-1-A 33	113.03	127.95	127.85	4.69138	4.69138	1865	80	7.53102
162-982A-13H-1-A 35	113.05	127.97	127.87	4.69194	4.69194	1740	78	7.46164
162-982A-13H-1-A 36	113.06	127.98	127.88	4.69221	4.69221	1681	32	7.42714
162-982A-13H-1-A 38	113.08	128	127.9	4.69276	4.69276	1739	47	7.46107
162-982A-13H-1-A 42	113.12	128.04	127.94	4.69387	4.69387	1614	66	7.38647
162-982A-13H-1-A 44	113.14	128.06	127.96	4.69442	4.69442	1654	69	7.41095
162-982A-13H-1-A 45	113.15	128.07	127.97	4.69469	4.69469	1630	38	7.39634
162-982A-13H-1-A 48	113.18	128.1	128	4.69552	4.69552	1584	58	7.36771
162-982A-13H-1-A 50	113.2	128.12	128.02	4.69607	4.69607	1579	40	7.36455
162-982A-13H-1-A 52	113.22	128.14	128.04	4.69662	4.69662	1444	64	7.27517
162-982A-13H-1-A 54	113.24	128.16	128.06	4.69717	4.69717	1683	30	7.42833
162-982A-13H-1-A 56	113.26	128.18	128.08	4.69772	4.69772	1767	57	7.47704
162-982A-13H-1-A 59	113.29	128.21	128.11	4.69834	4.69837	1909	75	7.55433
162-982A-13H-1-A 60	113.3	128.22	128.12	4.69851	4.69856	1566	24	7.35628
162-982A-13H-1-A 62	113.32	128.24	128.14	4.69885	4.69893	1700	46	7.43838
162-982A-13H-1-A 63	113.33	128.25	128.15	4.69902	4.69912	1765	53	7.47591
162-982A-13H-1-A 67.5	113.38	128.3	128.2	4.69987	4.70005	1894	39	7.54645
162-982A-13H-1-A 70	113.4	128.32	128.22	4.70021	4.70042	1620	48	7.39018
162-982A-13H-1-A 72	113.42	128.34	128.24	4.70055	4.70079	1845	26	7.52023
162-982A-13H-1-A 74	113.44	128.36	128.26	4.70089	4.70117	1835	69	7.5148
162-982A-13H-1-A 76	113.46	128.38	128.28	4.70123	4.70154	1774	58	7.48099
162-982A-13H-1-A 77	113.47	128.39	128.29	4.7014	4.70172	1851	-1	7.52348
162-982A-13H-1-A 80	113.5	128.42	128.32	4.70191	4.70228	1899	44	7.54908
162-982A-13H-1-A 83	113.53	128.45	128.35	4.70242	4.70284	1944	52	7.5725
162-982A-13H-1-A 84	113.54	128.46	128.36	4.70259	4.70303	1767	53	7.47704
162-982A-13H-1-A 86	113.56	128.48	128.38	4.70293	4.7034	1740	62	7.46164
162-982A-13H-1-A 87	113.57	128.49	128.39	4.7031	4.70359	1868	40	7.53262
162-982A-13H-1-A 90	113.6	128.52	128.42	4.70361	4.70414	1913	71	7.55643
162-982A-13H-1-A 93	113.63	128.55	128.45	4.70412	4.7047	1834	38	7.51425
162-982A-13H-1-A 94	113.64	128.56	128.46	4.70429	4.70489	1702	24	7.43956
162-982A-13H-1-A 96	113.66	128.58	128.48	4.70463	4.70526	1666	36	7.41818
162-982A-13H-1-A 97	113.67	128.59	128.49	4.7048	4.70545	1561	13	7.35308
162-982A-13H-1-A 101	113.71	128.63	128.53	4.70548	4.70619	1411	92	7.25205
162-982A-13H-1-A 102	113.72	128.64	128.54	4.70565	4.70638	1457	62	7.28413
162-982A-13H-1-A 104	113.74	128.66	128.56	4.70599	4.70675	1551	38	7.34666
162-982A-13H-1-A 106	113.76	128.68	128.58	4.70633	4.70712	1219	61	7.10579
162-982A-13H-1-A 109	113.79	128.71	128.61	4.70684	4.70768	1412	33	7.25276
162-982A-13H-1-A 110	113.8	128.72	128.62	4.70701	4.70787	1550	48	7.34601
162-982A-13H-1-A 112	113.82	128.74	128.64	4.70735	4.70824	1404	66	7.24708
162-982A-13H-1-A 114	113.84	128.76	128.66	4.70769	4.70861	1389	8	7.23634
162-982A-13H-1-A 116	113.86	128.78	128.68	4.70803	4.70899	1433	28	7.26753
162-982A-13H-1-A 117	113.87	128.79	128.69	4.7082	4.70917	1402	44	7.24566
162-982A-13H-1-A 120	113.9	128.82	128.72	4.70871	4.70973	1587	69	7.3696
162-982A-13H-1-A 122	113.92	128.84	128.74	4.70906	4.7101	1557	48	7.35052
162-982A-13H-1-A 124	113.94	128.86	128.76	4.7094	4.71047	1299	46	7.16935
162-982A-13H-1-A 127	113.97	128.89	128.79	4.70991	4.71103	1484	72	7.3025
162-982A-13H-1-A 128	113.98	128.9	128.8	4.71008	4.71122	1494	57	7.30921
162-982A-13H-1-A 130	114	128.92	128.82	4.71042	4.71159	1531	86	7.33368
162-982A-13H-1-A 132	114.02	128.94	128.84	4.71076	4.71196	1328	69	7.19143
162-982A-13H-1-A 133	114.03	128.95	128.85	4.71093	4.71215	1633	46	7.39817
162-982A-13H-1-A 136	114.06	128.98	128.88	4.71144	4.71271	1274	49	7.14992
162-982A-13H-1-A 138	114.08	129	128.9	4.71178	4.71308	1437	36	7.27031
162-982A-13H-1-A 140	114.1	129.02	128.92	4.71212	4.71345	1381	44	7.23056
162-982A-13H-1-A 142	114.12	129.04	128.94	4.71246	4.71383	1303	57	7.17242
162-982A-13H-1-A 144	114.14	129.06	128.96	4.7128	4.7142	1279	59	7.15383
162-982A-13H-1-A 146	114.16	129.08	128.98	4.71314	4.71457	1465	72	7.28961
162-982A-13H-1-A 148	114.18	129.1	129	4.71348	4.71494	1384	78	7.23273
162-982A-13H-2-A 3	114.23	129.15	129.05	4.71433	4.71587	1542	81	7.34084
162-982A-13H-2-A 4	114.24	129.16	129.06	4.7145	4.71606	1358	47	7.21377
162-982A-13H-2-A 6	114.26	129.18	129.08	4.71484	4.71643	1409	22	7.25064
162-982A-13H-2-A 8	114.28	129.2	129.1	4.71518	4.71681	1481	29	7.30047
162-982A-13H-2-A 9	114.29	129.21	129.11	4.71535	4.71699	1289	36	7.16162
162-982A-13H-2-A 11.5	114.32	129.24	129.14	4.71586	4.71755	1533	69	7.33498
162-982A-13H-2-A 14	114.34	129.26	129.16	4.7162	4.71792	1524	54	7.32909
162-982A-13H-2-A 16	114.36	129.28	129.18	4.71654	4.71829	1721	42	7.45066
162-982A-13H-2-A 18	114.38	129.3	129.2	4.71688	4.71867	1874	38	7.53583
162-982A-13H-2-A 20	114.4	129.32	129.22	4.71722	4.71904	1441	36	7.27309
162-982A-13H-2-A 22	114.42	129.34	129.24	4.71756	4.71941	1675	49	7.42357
162-982A-13H-2-A 24	114.44	129.36	129.26	4.7179	4.71978	1631	24	7.39695
162-982A-13H-2-A 25	114.45	129.37	129.27	4.71807	4.71997	1667	61	7.41878
162-982A-13H-2-A 28	114.48	129.4	129.3	4.71858	4.72053	1853	16	7.52456
162-982A-13H-2-A 29	114.49	129.41	129.31	4.71875	4.72072	1657	58	7.41276
162-982A-13H-2-A 30	114.5	129.42	129.32	4.71892	4.7209	1730	91	7.45588
162-982A-13H-2-A 32	114.52	129.44	129.34	4.71926	4.72127	1663	30	7.41638
162-982A-13H-2-A 34	114.54	129.46	129.36	4.7196	4.72165	1545	35	7.34278
162-982A-13H-2-A 36	114.56	129.48	129.38	4.71994	4.72202	1471	36	7.2937
162-982A-13H-2-A 38	114.58	129.5	129.4	4.72028	4.72239	1656	32	7.41216
162-982A-13H-2-A 40	114.6	129.52	129.42	4.72062	4.72276	2055	46	7.62803
162-982A-13H-2-A 42	114.62	129.54	129.44	4.72096	4.72314	1922	52	7.56112
162-982A-13H-2-A 44	114.64	129.56	129.46	4.7213	4.72351	2093	42	7.64635
162-982A-13H-2-A 48	114.68	129.6	129.5	4.72198	4.72425	1915	66	7.55747
162-982A-13H-2-A 49	114.69	129.61	129.51	4.72215	4.72444	1890	61	7.54433
162-982A-13H-2-A 50	114.7	129.62	129.52	4.72232	4.72463	2206	58	7.69894
162-982A-13H-2-A 52	114.72	129.64	129.54	4.72266	4.725	2212	46	7.70165
162-982A-13H-2-A 53	114.73	129.65	129.55	4.72283	4.72518	2369	75	7.77022
162-982A-13H-2-A 56	114.76	129.68	129.58	4.72334	4.72574	2373	72	7.77191
162-982A-13H-2-A 59	114.79	129.71	129.61	4.72385	4.7263	2308	61	7.74414
162-982A-13H-2-A 60	114.8	129.72	129.62	4.72402	4.72649	2624	81	7.87246
162-982A-13H-2-A 61	114.81	129.73	129.63	4.72419	4.72667	2425	69	7.79359
162-982A-13H-2-A 64	114.84	129.76	129.66	4.7247	4.72723	2558	66	7.84698
162-982A-13H-2-A 66	114.86	129.78	129.68	4.72504	4.7276	2516	41	7.83043
162-982A-13H-2-A 68.5	114.89	129.81	129.71	4.72555	4.72816	2474	30	7.81359
162-982A-13H-2-A 71	114.91	129.83	129.73	4.72589	4.72854	2356	26	7.76472
162-982A-13H-2-A 72	114.92	129.84	129.74	4.72606	4.72872	2630	111	7.87474
162-982A-13H-2-A 73	114.93	129.85	129.75	4.72623	4.72891	2519	58	7.83162
162-982A-13H-2-A 75.5	114.96	129.88	129.78	4.72674	4.72947	2645	60	7.88043
162-982A-13H-2-A 78	114.98	129.9	129.8	4.72708	4.72984	2596	78	7.86173
162-982A-13H-2-A 80	115	129.92	129.82	4.72742	4.73021	2789	38	7.93344
162-982A-13H-2-A 82	115.02	129.94	129.84	4.72776	4.73058	2507	58	7.82684
162-982A-13H-2-A 83	115.03	129.95	129.85	4.72793	4.73077	2540	73	7.83992
162-982A-13H-2-A 84	115.04	129.96	129.86	4.7281	4.73096	2556	68	7.8462
162-982A-13H-2-A 88	115.08	130	129.9	4.72878	4.7317	1913	83	7.55643
162-982A-13H-2-A 91	115.11	130.03	129.93	4.72929	4.73226	1951	43	7.5761
162-982A-13H-2-A 92	115.12	130.04	129.94	4.72946	4.73245	2008	53	7.60489
162-982A-13H-2-A 94	115.14	130.06	129.96	4.7298	4.73282	2141	63	7.66903
162-982A-13H-2-A 98	115.18	130.1	130	4.73049	4.73356	1710	50	7.44425
162-982A-13H-2-A 100	115.2	130.12	130.02	4.73083	4.73394	1888	49	7.54327
162-982A-13H-2-A 102	115.22	130.14	130.04	4.73117	4.73431	1656	41	7.41216
162-982A-13H-2-A 104	115.24	130.16	130.06	4.73151	4.73468	1627	34	7.39449
162-982A-13H-2-A 107	115.27	130.19	130.09	4.73202	4.73524	1850	83	7.52294
162-982A-13H-2-A 109	115.29	130.21	130.11	4.73236	4.73561	1720	99	7.45008
162-982A-13H-2-A 110	115.3	130.22	130.12	4.73253	4.7358	1550	69	7.34601
162-982A-13H-2-A 112	115.32	130.24	130.14	4.73287	4.73617	1644	46	7.40489
162-982A-13H-2-A 114	115.34	130.26	130.16	4.73321	4.73654	1331	24	7.19369
162-982A-13H-2-A 120	115.4	130.32	130.22	4.73423	4.73766	1483	41	7.30182
162-982A-13H-2-A 122	115.42	130.34	130.24	4.73457	4.73803	1564	34	7.355
162-982A-13H-2-A 124	115.44	130.36	130.26	4.73491	4.7384	1649	7	7.40792
162-982A-13H-2-A 126	115.46	130.38	130.28	4.73525	4.73878	1571	37	7.35947
162-982A-13H-2-A 129	115.49	130.41	130.31	4.73576	4.73933	1755	55	7.47022
162-982A-13H-2-A 130	115.5	130.42	130.32	4.73593	4.73952	1414	57	7.25418
162-982A-13H-2-A 132	115.52	130.44	130.34	4.73627	4.73989	1445	12	7.27586
162-982A-13H-2-A 133	115.53	130.45	130.35	4.73644	4.74008	1678	73	7.42536
162-982A-13H-2-A 136	115.56	130.48	130.38	4.73695	4.74064	1540	10	7.33954
162-982A-13H-2-A 138	115.58	130.5	130.4	4.73729	4.74101	1433	59	7.26753
162-982A-13H-2-A 140	115.6	130.52	130.42	4.73763	4.74138	1459	30	7.28551
162-982A-13H-2-A 142	115.62	130.54	130.44	4.73797	4.74176	1236	-3	7.11964
162-982A-13H-2-A 144	115.64	130.56	130.46	4.73831	4.74213	1535	35	7.33629
162-982A-13H-2-A 146	115.66	130.58	130.48	4.73865	4.7425	1601	55	7.37838
162-982A-13H-2-A 148	115.68	130.6	130.5	4.73899	4.74287	1265	50	7.14283
162-982A-13H-3-A 4	115.74	130.66	130.56	4.74001	4.74399	1835	2	7.5148
162-982A-13H-3-A 5	115.75	130.67	130.57	4.74018	4.74418	1475	57	7.29641
162-982A-13H-3-A 7.5	115.78	130.7	130.6	4.74069	4.74473	1131	22	7.03086
162-982A-13H-3-A 10	115.8	130.72	130.62	4.74103	4.74511	1431	57	7.26613
162-982A-13H-3-A 13	115.83	130.75	130.65	4.74154	4.74567	1287	46	7.16007
162-982A-13H-3-A 14	115.84	130.76	130.66	4.74171	4.74585	1406	46	7.2485
162-982A-13H-3-A 16.5	115.87	130.79	130.69	4.74222	4.74641	1421	-7	7.25912
162-982A-13H-3-A 19	115.89	130.81	130.71	4.74256	4.74678	1513	35	7.32185
162-982A-13H-3-A 20	115.9	130.82	130.72	4.74273	4.74697	1350	54	7.20786
162-982A-13H-3-A 23	115.93	130.85	130.75	4.74324	4.74753	1375	74	7.22621
162-982A-13H-3-A 24	115.94	130.86	130.76	4.74341	4.74771	1355	33	7.21156
162-982A-13H-3-A 27	115.97	130.89	130.79	4.74392	4.74827	1403	68	7.24637
162-982A-13H-3-A 28	115.98	130.9	130.8	4.74409	4.74846	1237	77	7.12044
162-982A-13H-3-A 31	116.01	130.93	130.83	4.7446	4.74902	1195	60	7.0859
162-982A-13H-3-A 32	116.02	130.94	130.84	4.74477	4.7492	1378	58	7.22839
162-982A-13H-3-A 34	116.04	130.96	130.86	4.74511	4.74958	1253	40	7.1333
162-982A-13H-3-A 36.5	116.07	130.99	130.89	4.74562	4.75013	1177	53	7.07072
162-982A-13H-3-A 38.5	116.09	131.01	130.91	4.74596	4.75051	1415	58	7.25488
162-982A-13H-3-A 41	116.11	131.03	130.93	4.7463	4.75088	1030	47	6.93731
162-982A-13H-3-A 42	116.12	131.04	130.94	4.74647	4.75106	1366	73	7.21964
162-982A-13H-3-A 44	116.14	131.06	130.96	4.74681	4.75144	1664	5	7.41698
162-982A-13H-3-A 46.5	116.17	131.09	130.99	4.74732	4.752	1449	59	7.27863
162-982A-13H-3-A 48.5	116.19	131.11	131.01	4.74766	4.75237	1237	58	7.12044
162-982A-13H-3-A 51	116.21	131.13	131.03	4.748	4.75274	1497	45	7.31122
162-982A-13H-3-A 52	116.22	131.14	131.04	4.74817	4.75293	1636	46	7.40001
162-982A-13H-3-A 54	116.24	131.16	131.06	4.74851	4.7533	1411	51	7.25205
162-982A-13H-3-A 56	116.26	131.18	131.08	4.74885	4.75367	1622	33	7.39142
162-982A-13H-3-A 58	116.28	131.2	131.1	4.74919	4.75404	1675	52	7.42357
162-982A-13H-3-A 61	116.31	131.23	131.13	4.7497	4.7546	1621	64	7.3908
162-982A-13H-3-A 62	116.32	131.24	131.14	4.74987	4.75479	1756	46	7.47079
162-982A-13H-3-A 64	116.34	131.26	131.16	4.75021	4.75516	1776	52	7.48212
162-982A-13H-3-A 66	116.36	131.28	131.18	4.75055	4.75553	1708	44	7.44308
162-982A-13H-3-A 68.5	116.39	131.31	131.21	4.75106	4.75609	1353	48	7.21008
162-982A-13H-3-A 70.5	116.41	131.33	131.23	4.7514	4.75646	1679	29	7.42595
162-982A-13H-3-A 73	116.43	131.35	131.25	4.75174	4.75684	1567	33	7.35692
162-982A-13H-3-A 74	116.44	131.36	131.26	4.75191	4.75702	1517	55	7.32449
162-982A-13H-3-A 75	116.45	131.37	131.27	4.75209	4.75721	1619	27	7.38956
162-982A-13H-3-A 78	116.48	131.4	131.3	4.7526	4.75777	1545	44	7.34278
162-982A-13H-3-A 80	116.5	131.42	131.32	4.75294	4.75814	1542	43	7.34084
162-982A-13H-3-A 82	116.52	131.44	131.34	4.75328	4.75851	1428	33	7.26403
162-982A-13H-3-A 84	116.54	131.46	131.36	4.75362	4.75888	1512	53	7.32119
162-982A-13H-3-A 86	116.56	131.48	131.38	4.75396	4.75926	1377	45	7.22766
162-982A-13H-3-A 90	116.6	131.52	131.42	4.75464	4.76	1406	40	7.2485
162-982A-13H-3-A 92	116.62	131.54	131.44	4.75498	4.76037	1629	50	7.39572
162-982A-13H-3-A 93	116.63	131.55	131.45	4.75515	4.76056	1522	50	7.32778
162-982A-13H-3-A 96	116.66	131.58	131.48	4.75566	4.76112	1359	53	7.2145
162-982A-13H-3-A 98	116.68	131.6	131.5	4.756	4.76149	1495	50	7.30988
162-982A-13H-3-A 99	116.69	131.61	131.51	4.75617	4.76168	1627	41	7.39449
162-982A-13H-3-A 100	116.7	131.62	131.52	4.75634	4.76186	1700	66	7.43838
162-982A-13H-3-A 102	116.72	131.64	131.54	4.75668	4.76224	1563	44	7.35436
162-982A-13H-3-A 104	116.74	131.66	131.56	4.75702	4.76261	1354	59	7.21082
162-982A-13H-3-A 105	116.75	131.67	131.57	4.75719	4.76279	1331	23	7.19369
162-982A-13H-3-A 109	116.79	131.71	131.61	4.75787	4.76354	1508	28	7.31854
162-982A-13H-3-A 110	116.8	131.72	131.62	4.75804	4.76373	1741	29	7.46221
162-982A-13H-3-A 112	116.82	131.74	131.64	4.75838	4.7641	1799	66	7.49499
162-982A-13H-3-A 114	116.84	131.76	131.66	4.75872	4.76447	1756	63	7.47079
162-982A-13H-3-A 115	116.85	131.77	131.67	4.75889	4.76466	1819	67	7.50604
162-982A-13H-3-A 118	116.88	131.8	131.7	4.7594	4.76522	1628	30	7.39511
162-982A-13H-3-A 120	116.9	131.82	131.72	4.75974	4.76559	1708	39	7.44308
162-982A-13H-3-A 122	116.92	131.84	131.74	4.76008	4.76596	1888	45	7.54327
162-982A-13H-3-A 123	116.93	131.85	131.75	4.76025	4.76615	1699	32	7.4378
162-982A-13H-3-A 126	116.96	131.88	131.78	4.76076	4.76671	1500	50	7.31322
162-982A-13H-3-A 128	116.98	131.9	131.8	4.7611	4.76708	1643	35	7.40428
162-982A-13H-3-A 129	116.99	131.91	131.81	4.76127	4.76726	1770	43	7.47873
162-982A-13H-3-A 132	117.02	131.94	131.84	4.76178	4.76782	1645	41	7.4055
162-982A-13H-3-A 134	117.04	131.96	131.86	4.76212	4.76819	1812	27	7.50219
162-982A-13H-3-A 135	117.05	131.97	131.87	4.76229	4.76838	1816	33	7.50439
162-982A-13H-3-A 139	117.09	132.01	131.91	4.76297	4.76913	1892	42	7.54539
162-982A-13H-3-A 140	117.1	132.02	131.92	4.76314	4.76931	1793	33	7.49165
162-982A-13H-3-A 142	117.12	132.04	131.94	4.76348	4.76968	1675	90	7.42357
162-982A-13H-3-A 143	117.13	132.05	131.95	4.76365	4.76987	1851	27	7.52348
162-982A-13H-3-A 146	117.16	132.08	131.98	4.76416	4.77043	2092	42	7.64588
162-982A-13H-3-A 148.5	117.19	132.11	132.01	4.76467	4.77099	1822	31	7.50769
162-982A-13H-4-A 2	117.22	132.14	132.04	4.76518	4.77155	2308	22	7.74414
162-982A-13H-4-A 4	117.24	132.16	132.06	4.76552	4.77192	2247	45	7.71735
162-982A-13H-4-A 6	117.26	132.18	132.08	4.76586	4.77229	2310	56	7.745
162-982A-13H-4-A 9	117.29	132.21	132.11	4.76637	4.77285	2460	43	7.80792
162-982A-13H-4-A 10	117.3	132.22	132.12	4.76654	4.77304	2331	86	7.75405
162-982A-13H-4-A 12	117.32	132.24	132.14	4.76688	4.77341	2248	36	7.7178
162-982A-13H-4-A 13	117.33	132.25	132.15	4.76705	4.77359	2496	69	7.82244
162-982A-13H-4-A 16	117.36	132.28	132.18	4.76756	4.77415	2236	30	7.71244
162-982A-13H-4-A 19	117.39	132.31	132.21	4.76807	4.77471	2947	42	7.98854
162-982A-13H-4-A 20	117.4	132.32	132.22	4.76824	4.7749	2821	64	7.94485
162-982A-13H-4-A 21	117.41	132.33	132.23	4.76841	4.77508	3094	69	8.03722
162-982A-13H-4-A 23.5	117.44	132.36	132.26	4.76892	4.77564	2831	3	7.94839
162-982A-13H-4-A 26.5	117.47	132.39	132.29	4.76943	4.7762	2666	27	7.88833
162-982A-13H-4-A 28	117.48	132.4	132.3	4.7696	4.77639	2910	92	7.97591
162-982A-13H-4-A 30	117.5	132.42	132.32	4.76994	4.77676	2528	46	7.83518
162-982A-13H-4-A 32	117.52	132.44	132.34	4.77028	4.77713	2495	52	7.82204
162-982A-13H-4-A 33	117.53	132.45	132.35	4.77045	4.77732	2740	20	7.91571
162-982A-13H-4-A 35.5	117.56	132.48	132.38	4.77096	4.77788	2264	8	7.72489
162-982A-13H-4-A 39	117.59	132.51	132.41	4.77147	4.77844	2457	54	7.8067
162-982A-13H-4-A 40	117.6	132.52	132.42	4.77164	4.77862	2250	22	7.71869
162-982A-13H-4-A 42	117.62	132.54	132.44	4.77198	4.77899	2188	38	7.69074
162-982A-13H-4-A 44	117.64	132.56	132.46	4.77232	4.77937	1988	41	7.59488
162-982A-13H-4-A 46	117.66	132.58	132.48	4.77266	4.77974	1712	66	7.44542
162-982A-13H-4-A 48	117.68	132.6	132.5	4.773	4.78011	1761	68	7.47364
162-982A-13H-4-A 49	117.69	132.61	132.51	4.77317	4.7803	1720	31	7.45008
162-982A-13H-4-A 50	117.7	132.62	132.52	4.77334	4.78048	1954	61	7.57763
162-982A-13H-4-A 52	117.72	132.64	132.54	4.77369	4.78086	1765	63	7.47591
162-982A-13H-4-A 54	117.74	132.66	132.56	4.77403	4.78123	1464	78	7.28893
162-982A-13H-4-A 57	117.77	132.69	132.59	4.77454	4.78179	1499	36	7.31255
162-982A-13H-4-A 58	117.78	132.7	132.6	4.77471	4.78197	1725	43	7.45298
162-982A-13H-4-A 60	117.8	132.72	132.62	4.77505	4.78235	1294	36	7.16549
162-982A-13H-4-A 62	117.82	132.74	132.64	4.77539	4.78272	1491	17	7.3072
162-982A-13H-4-A 64	117.84	132.76	132.66	4.77573	4.78309	1484	44	7.3025
162-982A-13H-4-A 65	117.85	132.77	132.67	4.7759	4.78328	1512	59	7.32119
162-982A-13H-4-A 67	117.87	132.79	132.69	4.77624	4.78365	1610	57	7.38399
162-982A-13H-4-A 68	117.88	132.8	132.7	4.77641	4.78383	1612	41	7.38523
162-982A-13H-4-A 69	117.89	132.81	132.71	4.77658	4.78402	1458	32	7.28482
162-982A-13H-4-A 71	117.91	132.83	132.73	4.77692	4.78439	1434	72	7.26822
162-982A-13H-4-A 72	117.92	132.84	132.74	4.77709	4.78458	1471	57	7.2937
162-982A-13H-4-A 73	117.93	132.85	132.75	4.77726	4.78477	1539	43	7.33889
162-982A-13H-4-A 76	117.96	132.88	132.78	4.77777	4.78532	1441	54	7.27309
162-982A-13H-4-A 78	117.98	132.9	132.8	4.77811	4.7857	1302	-7	7.17166
162-982A-13H-4-A 79	117.99	132.91	132.81	4.77828	4.78588	1250	52	7.1309
162-982A-13H-4-A 80	118	132.92	132.82	4.77845	4.78607	1353	50	7.21008
162-982A-13H-4-A 82	118.02	132.94	132.84	4.77879	4.78644	1291	22	7.16317
162-982A-13H-4-A 84	118.04	132.96	132.86	4.77913	4.78681	1485	59	7.30317
162-982A-13H-4-A 87	118.07	132.99	132.89	4.77964	4.78737	1391	10	7.23778
162-982A-13H-4-A 88	118.08	133	132.9	4.77981	4.78756	1343	64	7.20266
162-982A-13H-4-A 90	118.1	133.02	132.92	4.78015	4.78793	1433	50	7.26753
162-982A-13H-4-A 91	118.11	133.03	132.93	4.78032	4.78812	1340	50	7.20042
162-982A-13H-4-A 93.5	118.14	133.06	132.96	4.78083	4.78868	1237	52	7.12044
162-982A-13H-4-A 97	118.17	133.09	132.99	4.78134	4.78923	1396	58	7.24137
162-982A-13H-4-A 99.5	118.2	133.12	133.02	4.78185	4.78979	1397	55	7.24208
162-982A-13H-4-A 100	118.2	133.12	133.02	4.78185	4.78979	1410	13	7.25134
162-982A-13H-4-A 101	118.21	133.13	133.03	4.78202	4.78998	1628	36	7.39511
162-982A-13H-4-A 104	118.24	133.16	133.06	4.78253	4.79054	1529	30	7.33237
162-982A-13H-4-A 106	118.26	133.18	133.08	4.78287	4.79091	1232	49	7.11639
162-982A-13H-4-A 107	118.27	133.19	133.09	4.78304	4.7911	1387	36	7.2349
162-982A-13H-4-A 109	118.29	133.21	133.11	4.78338	4.79147	1549	10	7.34536
162-982A-13H-4-A 110	118.3	133.22	133.12	4.78355	4.79165	1538	83	7.33824
162-982A-13H-4-A 112	118.32	133.24	133.14	4.78389	4.79203	1500	29	7.31322
162-982A-13H-4-A 114	118.34	133.26	133.16	4.78423	4.7924	1317	36	7.18311
162-982A-13H-4-A 116	118.36	133.28	133.18	4.78457	4.79277	1416	34	7.25559
162-982A-13H-4-A 119	118.39	133.31	133.21	4.78508	4.79333	1482	23	7.30115
162-982A-13H-4-A 120	118.4	133.32	133.22	4.78525	4.79352	1519	58	7.32581
162-982A-13H-4-A 122	118.42	133.34	133.24	4.78559	4.79389	1453	65	7.28139
162-982A-13H-4-A 125	118.45	133.37	133.27	4.7861	4.79445	1674	48	7.42297
162-982A-13H-4-A 127	118.47	133.39	133.29	4.78644	4.79482	1465	63	7.28961
162-982A-13H-4-A 128	118.48	133.4	133.3	4.78661	4.79501	1526	39	7.33041
162-982A-13H-4-A 129	118.49	133.41	133.31	4.78678	4.79519	1529	43	7.33237
162-982A-13H-4-A 132	118.52	133.44	133.34	4.78729	4.79575	1381	33	7.23056
162-982A-13H-4-A 134	118.54	133.46	133.36	4.78763	4.79612	1408	28	7.24993
162-982A-13H-4-A 136	118.56	133.48	133.38	4.78797	4.7965	1481	37	7.30047
162-982A-13H-4-A 138	118.58	133.5	133.4	4.78831	4.79687	1480	54	7.2998
162-982A-13H-4-A 139	118.59	133.51	133.41	4.78848	4.79705	1587	37	7.3696
162-982A-13H-4-A 141	118.61	133.53	133.43	4.78882	4.79743	1360	59	7.21524
162-982A-13H-4-A 144	118.64	133.56	133.46	4.78933	4.79799	1553	86	7.34794
162-982A-13H-4-A 145	118.65	133.57	133.47	4.7895	4.79817	1342	70	7.20192
162-982A-13H-4-A 148	118.68	133.6	133.5	4.79001	4.79873	1720	41	7.45008
162-982A-15H-1-A 2	131.72	149	148.71	5.04662	5.03678	1300	76	7.17012
162-982A-15H-1-A 4	131.74	149.02	148.73	5.04695	5.03704	1259	46	7.13807
162-982A-15H-1-A 6	131.76	149.04	148.75	5.04729	5.0373	1259	31	7.13807
162-982A-15H-1-A 7	131.77	149.05	148.76	5.04745	5.03743	1280	46	7.15462
162-982A-15H-1-A 11	131.81	149.09	148.8	5.04812	5.03795	1540	43	7.33954
162-982A-15H-1-A 12	131.82	149.1	148.81	5.04829	5.03808	1520	90	7.32647
162-982A-15H-1-A 14	131.84	149.12	148.83	5.04863	5.03834	1522	41	7.32778
162-982A-15H-1-A 16	131.86	149.14	148.85	5.04896	5.0386	1320	50	7.18539
162-982A-15H-1-A 19	131.89	149.17	148.88	5.04946	5.03899	1602	29	7.37901
162-982A-15H-1-A 20	131.9	149.18	148.89	5.04963	5.03912	1471	33	7.2937
162-982A-15H-1-A 22	131.92	149.2	148.91	5.04996	5.03937	1728	14	7.45472
162-982A-15H-1-A 24	131.94	149.22	148.93	5.0503	5.03963	1600	27	7.37776
162-982A-15H-1-A 26	131.96	149.24	148.95	5.05063	5.03989	1481	33	7.30047
162-982A-15H-1-A 28	131.98	149.26	148.97	5.05097	5.04015	1526	36	7.33041
162-982A-15H-1-A 30	132	149.28	148.99	5.0513	5.04041	1420	30	7.25841
162-982A-15H-1-A 31	132.01	149.29	149	5.05147	5.04054	1371	47	7.2233
162-982A-15H-1-A 34	132.04	149.32	149.03	5.05197	5.04093	1540	94	7.33954
162-982A-15H-1-A 36	132.06	149.34	149.05	5.05231	5.04119	1394	50	7.23993
162-982A-15H-1-A 38	132.08	149.36	149.07	5.05264	5.04145	1549	27	7.34536
162-982A-15H-1-A 41	132.11	149.39	149.1	5.05315	5.04184	1530	31	7.33302
162-982A-15H-1-A 42	132.12	149.4	149.11	5.05331	5.04197	1578	66	7.36391
162-982A-15H-1-A 44	132.14	149.42	149.13	5.05365	5.04223	1531	54	7.33368
162-982A-15H-1-A 46	132.16	149.44	149.15	5.05398	5.04249	1445	44	7.27586
162-982A-15H-1-A 48	132.18	149.46	149.17	5.05432	5.04275	1323	51	7.18766
162-982A-15H-1-A 50	132.2	149.48	149.19	5.05465	5.04301	1406	34	7.2485
162-982A-15H-1-A 52	132.22	149.5	149.21	5.05499	5.04327	1485	36	7.30317
162-982A-15H-1-A 53	132.23	149.51	149.22	5.05516	5.0434	1374	30	7.22548
162-982A-15H-1-A 56	132.26	149.54	149.25	5.05566	5.04379	1590	41	7.37149
162-982A-15H-1-A 58	132.28	149.56	149.27	5.05599	5.04405	1649	36	7.40792
162-982A-15H-1-A 60	132.3	149.58	149.29	5.05633	5.04431	1535	66	7.33629
162-982A-15H-1-A 63	132.33	149.61	149.32	5.05683	5.0447	1761	58	7.47364
162-982A-15H-1-A 64	132.34	149.62	149.33	5.057	5.04483	1647	81	7.40671
162-982A-15H-1-A 66	132.36	149.64	149.35	5.05733	5.04509	1495	35	7.30988
162-982A-15H-1-A 67	132.37	149.65	149.36	5.0575	5.04522	1643	72	7.40428
162-982A-15H-1-A 69	132.39	149.67	149.38	5.05783	5.04547	1547	83	7.34407
162-982A-15H-1-A 70	132.4	149.68	149.39	5.058	5.0456	1693	48	7.43426
162-982A-15H-1-A 73	132.43	149.71	149.42	5.0585	5.04599	1568	5	7.35756
162-982A-15H-1-A 74	132.44	149.72	149.43	5.05867	5.04612	1826	8	7.50988
162-982A-15H-1-A 76	132.46	149.74	149.45	5.05901	5.04638	1568	75	7.35756
162-982A-15H-1-A 77	132.47	149.75	149.46	5.05917	5.04651	1637	78	7.40062
162-982A-15H-1-A 80	132.5	149.78	149.49	5.05968	5.0469	1645	23	7.4055
162-982A-15H-1-A 82	132.52	149.8	149.51	5.06001	5.04716	1725	33	7.45298
162-982A-15H-1-A 85	132.55	149.83	149.54	5.06051	5.04755	1815	81	7.50384
162-982A-15H-1-A 86	132.56	149.84	149.55	5.06068	5.04768	1840	39	7.51752
162-982A-15H-1-A 89	132.59	149.87	149.58	5.06118	5.04807	1769	47	7.47817
162-982A-15H-1-A 90	132.6	149.88	149.59	5.06135	5.0482	1744	63	7.46394
162-982A-15H-1-A 92	132.62	149.9	149.61	5.06169	5.04846	1748	50	7.46623
162-982A-15H-1-A 94	132.64	149.92	149.63	5.06202	5.04872	2193	69	7.69303
162-982A-15H-1-A 97	132.67	149.95	149.66	5.06252	5.04911	2205	37	7.69848
162-982A-15H-1-A 98	132.68	149.96	149.67	5.06269	5.04924	2062	78	7.63143
162-982A-15H-1-A 99	132.69	149.97	149.68	5.06286	5.04937	2240	37	7.71423
162-982A-15H-1-A 102	132.72	150	149.71	5.06336	5.04976	1520	52	7.32647
162-982A-15H-1-A 104	132.74	150.02	149.73	5.0637	5.05002	1611	55	7.38461
162-982A-15H-1-A 105	132.75	150.03	149.74	5.06386	5.05015	1411	36	7.25205
162-982A-15H-1-A 108	132.78	150.06	149.77	5.06437	5.05054	1645	78	7.4055
162-982A-15H-1-A 109	132.79	150.07	149.78	5.06453	5.05067	1822	28	7.50769
162-982A-15H-1-A 112	132.82	150.1	149.81	5.06504	5.05106	1326	42	7.18992
162-982A-15H-1-A 114	132.84	150.12	149.83	5.06537	5.05132	1381	43	7.23056
162-982A-15H-1-A 116	132.86	150.14	149.85	5.0657	5.05158	1459	52	7.28551
162-982A-15H-1-A 117	132.87	150.15	149.86	5.06587	5.05171	1334	49	7.19594
162-982A-15H-1-A 120	132.9	150.18	149.89	5.06637	5.05209	1459	78	7.28551
162-982A-15H-1-A 122	132.92	150.2	149.91	5.06671	5.05235	1338	56	7.19893
162-982A-15H-1-A 124	132.94	150.22	149.93	5.06704	5.05261	1277	81	7.15227
162-982A-15H-1-A 126	132.96	150.24	149.95	5.06738	5.05287	1399	58	7.24351
162-982A-15H-1-A 128	132.98	150.26	149.97	5.06771	5.05313	1357	5	7.21303
162-982A-15H-1-A 130	133	150.28	149.99	5.06805	5.05339	1465	27	7.28961
162-982A-15H-1-A 131	133.01	150.29	150	5.06822	5.05352	1541	49	7.34019
162-982A-15H-1-A 134	133.04	150.32	150.03	5.06872	5.05391	1551	38	7.34666
162-982A-15H-1-A 136	133.06	150.34	150.05	5.06905	5.05417	1645	57	7.4055
162-982A-15H-1-A 137	133.07	150.35	150.06	5.06922	5.0543	1972	13	7.5868
162-982A-15H-1-A 140	133.1	150.38	150.09	5.06972	5.05469	2116	27	7.65728
162-982A-15H-1-A 142	133.12	150.4	150.11	5.07006	5.05495	1945	58	7.57302
162-982A-15H-1-A 144	133.14	150.42	150.13	5.07039	5.05521	2045	33	7.62315
162-982A-15H-1-A 146	133.16	150.44	150.15	5.07073	5.05547	2392	90	7.77989
162-982A-15H-2-A 2	133.22	150.5	150.21	5.07173	5.05625	2479	21	7.81561
162-982A-15H-2-A 4	133.24	150.52	150.23	5.07207	5.05651	2539	71	7.83953
162-982A-15H-2-A 6	133.26	150.54	150.25	5.0724	5.05677	2837	73	7.9505
162-982A-15H-2-A 8	133.28	150.56	150.27	5.07274	5.05703	2778	40	7.92949
162-982A-15H-2-A 10	133.3	150.58	150.29	5.07307	5.05729	2880	49	7.96555
162-982A-15H-2-A 11	133.31	150.59	150.3	5.07324	5.05742	2897	70	7.97143
162-982A-15H-2-A 14	133.34	150.62	150.33	5.07374	5.05781	2841	32	7.95191
162-982A-15H-2-A 15	133.35	150.63	150.34	5.07391	5.05794	3214	54	8.07527
162-982A-15H-2-A 18	133.38	150.66	150.37	5.07441	5.05832	3100	66	8.03916
162-982A-15H-2-A 20	133.4	150.68	150.39	5.07475	5.05858	3137	69	8.05102
162-982A-15H-2-A 21	133.41	150.69	150.4	5.07491	5.05871	3016	38	8.01169
162-982A-15H-2-A 26	133.46	150.74	150.45	5.07575	5.05936	3080	72	8.03268
162-982A-15H-2-A 28	133.48	150.76	150.47	5.07609	5.05962	3145	35	8.05357
162-982A-15H-2-A 29	133.49	150.77	150.48	5.07625	5.05975	3174	44	8.06275
162-982A-15H-2-A 32	133.52	150.8	150.51	5.07676	5.06014	3717	52	8.22067
162-982A-15H-2-A 34	133.54	150.82	150.53	5.07709	5.0604	3831	84	8.25088
162-982A-15H-2-A 35	133.55	150.83	150.54	5.07726	5.06053	4251	69	8.35491
162-982A-15H-2-A 39	133.59	150.87	150.58	5.07793	5.06105	3884	66	8.26462
162-982A-15H-2-A 40	133.6	150.88	150.59	5.0781	5.06118	3992	75	8.29205
162-982A-15H-2-A 42	133.62	150.9	150.61	5.07843	5.06144	3899	98	8.26848
162-982A-15H-2-A 45	133.65	150.93	150.64	5.07893	5.06183	3191	30	8.06809
162-982A-15H-2-A 46	133.66	150.94	150.65	5.0791	5.06196	3155	87	8.05674
162-982A-15H-2-A 48	133.68	150.96	150.67	5.07944	5.06222	2654	44	7.88382
162-982A-15H-2-A 51	133.71	150.99	150.7	5.07994	5.06261	2204	55	7.69803
162-982A-15H-2-A 52	133.72	151	150.71	5.08011	5.06274	2035	28	7.61825
162-982A-15H-2-A 54	133.74	151.02	150.73	5.08044	5.063	2165	52	7.68018
162-982A-15H-2-A 55	133.75	151.03	150.74	5.08061	5.06313	2381	85	7.77528
162-982A-15H-2-A 58	133.78	151.06	150.77	5.08111	5.06352	1619	44	7.38956
162-982A-15H-2-A 60	133.8	151.08	150.79	5.08144	5.06378	1693	58	7.43426
162-982A-15H-2-A 63	133.83	151.11	150.82	5.08195	5.06417	1580	78	7.36518
162-982A-15H-2-A 64	133.84	151.12	150.83	5.08211	5.06429	1512	41	7.32119
162-982A-15H-2-A 66	133.86	151.14	150.85	5.08245	5.06455	1468	84	7.29166
162-982A-15H-2-A 67	133.87	151.15	150.86	5.08262	5.06468	1521	22	7.32712
162-982A-15H-2-A 68	133.88	151.16	150.87	5.08278	5.06481	1486	19	7.30384
162-982A-15H-2-A 70	133.9	151.18	150.89	5.08312	5.06507	1513	6	7.32185
162-982A-15H-2-A 72	133.92	151.2	150.91	5.08345	5.06533	1587	37	7.3696
162-982A-15H-2-A 75	133.95	151.23	150.94	5.08396	5.06572	1599	41	7.37713
162-982A-15H-2-A 76	133.96	151.24	150.95	5.08412	5.06585	1706	44	7.44191
162-982A-15H-2-A 78	133.98	151.26	150.97	5.08446	5.06611	1508	52	7.31854
162-982A-15H-2-A 80	134	151.28	150.99	5.08479	5.06637	1629	16	7.39572
162-982A-15H-2-A 82	134.02	151.3	151.01	5.08513	5.06663	1692	46	7.43367
162-982A-15H-2-A 83	134.03	151.31	151.02	5.0853	5.06676	1506	68	7.31721
162-982A-15H-2-A 86	134.06	151.34	151.05	5.0858	5.06715	1634	42	7.39879
162-982A-15H-2-A 87	134.07	151.35	151.06	5.08597	5.06728	1832	64	7.51316
162-982A-15H-2-A 90	134.1	151.38	151.09	5.08647	5.06767	2028	82	7.61481
162-982A-15H-2-A 91	134.11	151.39	151.1	5.08664	5.0678	1826	78	7.50988
162-982A-15H-2-A 95	134.15	151.43	151.14	5.08731	5.06832	2050	47	7.6256
162-982A-15H-2-A 96	134.16	151.44	151.15	5.08747	5.06845	2117	80	7.65776
162-982A-15H-2-A 98	134.18	151.46	151.17	5.08781	5.06871	2008	79	7.60489
162-982A-15H-2-A 101	134.21	151.49	151.2	5.08831	5.0691	2599	95	7.86288
162-982A-15H-2-A 102	134.22	151.5	151.21	5.08848	5.06923	2695	58	7.89915
162-982A-15H-2-A 104	134.24	151.52	151.23	5.08881	5.06949	3158	24	8.05769
162-982A-15H-2-A 105	134.25	151.53	151.24	5.08898	5.06962	3016	122	8.01169
162-982A-15H-2-A 108	134.28	151.56	151.27	5.08948	5.07001	3101	72	8.03948
162-982A-15H-2-A 109	134.29	151.57	151.28	5.08965	5.07014	3294	78	8.09986
162-982A-15H-2-A 112	134.32	151.6	151.31	5.09015	5.07053	3270	116	8.09255
162-982A-15H-2-A 114	134.34	151.62	151.33	5.09049	5.07078	4198	119	8.34236
162-982A-15H-2-A 115	134.35	151.63	151.34	5.09065	5.07091	4424	132	8.3948
162-982A-15H-2-A 116	134.36	151.64	151.35	5.09082	5.07104	4796	111	8.47554
162-982A-15H-2-A 119	134.39	151.67	151.38	5.09132	5.07143	4295	156	8.36521
162-982A-15H-2-A 120	134.4	151.68	151.39	5.09149	5.07156	1587	52	7.3696
162-982A-15H-2-A 121	134.41	151.69	151.4	5.09166	5.07169	3934	125	8.27741
162-982A-15H-2-A 124	134.44	151.72	151.43	5.09216	5.07208	2057	63	7.629
162-982A-15H-2-A 126	134.46	151.74	151.45	5.0925	5.07234	1583	66	7.36708
162-982A-15H-2-A 127	134.47	151.75	151.46	5.09266	5.07247	1485	41	7.30317
162-982A-15H-2-A 131	134.51	151.79	151.5	5.09333	5.07299	1475	32	7.29641
162-982A-15H-2-A 132	134.52	151.8	151.51	5.0935	5.07312	1552	47	7.3473
162-982A-15H-2-A 134	134.54	151.82	151.53	5.09384	5.07338	1561	52	7.35308
162-982A-15H-2-A 135	134.55	151.83	151.54	5.094	5.07351	1386	75	7.23418
162-982A-15H-2-A 139	134.59	151.87	151.58	5.09467	5.07403	1211	58	7.0992
162-982A-15H-2-A 140	134.6	151.88	151.59	5.09484	5.07416	1328	44	7.19143
162-982A-15H-2-A 142	134.62	151.9	151.61	5.09518	5.07442	1211	33	7.0992
162-982A-15H-2-A 144	134.64	151.92	151.63	5.09551	5.07468	1136	86	7.03527
162-982A-15H-2-A 146	134.66	151.94	151.65	5.09584	5.07494	1231	27	7.11558
162-982A-15H-2-A 148	134.68	151.96	151.67	5.09618	5.0752	1354	44	7.21082
162-982A-15H-2-A 150	134.7	151.98	151.69	5.09651	5.07546	1527	36	7.33106
162-982A-15H-2-A 151	134.71	151.99	151.7	5.09668	5.07559	1429	47	7.26473
162-982A-15H-3-A 2	134.72	152	151.71	5.09685	5.07572	1423	58	7.26052
162-982A-15H-3-A 4	134.74	152.02	151.73	5.09718	5.07598	1470	47	7.29302
162-982A-15H-3-A 6	134.76	152.04	151.75	5.09752	5.07624	1529	34	7.33237
162-982A-15H-3-A 8	134.78	152.06	151.77	5.09785	5.0765	1419	58	7.25771
162-982A-15H-3-A 10	134.8	152.08	151.79	5.09819	5.07676	1400	41	7.24423
162-982A-15H-3-A 11	134.81	152.09	151.8	5.09836	5.07688	1420	33	7.25841
162-982A-15H-3-A 14	134.84	152.12	151.83	5.09886	5.07727	1477	46	7.29777
162-982A-15H-3-A 16	134.86	152.14	151.85	5.09919	5.07753	1483	44	7.30182
162-982A-15H-3-A 19	134.89	152.17	151.88	5.0997	5.07792	1512	2	7.32119
162-982A-15H-3-A 22	134.92	152.2	151.91	5.1002	5.07831	1358	28	7.21377
162-982A-15H-3-A 24	134.94	152.22	151.93	5.10053	5.07857	1523	64	7.32844
162-982A-15H-3-A 26	134.96	152.24	151.95	5.10087	5.07883	1571	54	7.35947
162-982A-15H-3-A 29	134.99	152.27	151.98	5.10137	5.07922	1599	31	7.37713
162-982A-15H-3-A 30	135	152.28	151.99	5.10154	5.07935	1656	19	7.41216
162-982A-15H-3-A 32	135.02	152.3	152.01	5.10187	5.07961	1681	33	7.42714
162-982A-15H-3-A 35	135.05	152.33	152.04	5.10238	5.08	1320	25	7.18539
162-982A-15H-3-A 36	135.06	152.34	152.05	5.10254	5.08021	1551	36	7.34666
162-982A-15H-3-A 39	135.09	152.37	152.08	5.10304	5.08084	1630	74	7.39634
162-982A-15H-3-A 40	135.1	152.38	152.09	5.10321	5.08106	1761	38	7.47364
162-982A-15H-3-A 42	135.12	152.4	152.11	5.10355	5.08148	1667	-9	7.41878
162-982A-15H-3-A 45	135.15	152.43	152.14	5.10405	5.08211	1526	61	7.33041
162-982A-15H-3-A 46	135.16	152.44	152.15	5.10422	5.08232	1516	66	7.32383
162-982A-15H-3-A 49	135.19	152.47	152.18	5.10472	5.08296	1659	71	7.41397
162-982A-15H-3-A 50	135.2	152.48	152.19	5.10489	5.08317	1641	72	7.40306
162-982A-15H-3-A 52	135.22	152.5	152.21	5.10522	5.08359	1733	40	7.45761
162-982A-15H-3-A 54	135.24	152.52	152.23	5.10556	5.08401	1757	36	7.47136
162-982A-15H-3-A 56	135.26	152.54	152.25	5.10589	5.08443	1657	41	7.41276
162-982A-15H-3-A 57	135.27	152.55	152.26	5.10606	5.08464	1701	61	7.43897
162-982A-15H-3-A 60	135.3	152.58	152.29	5.10656	5.08528	2013	89	7.60738
162-982A-15H-3-A 61	135.31	152.59	152.3	5.10673	5.08549	1733	27	7.45761
162-982A-15H-3-A 64.5	135.35	152.63	152.34	5.1074	5.08633	2160	66	7.67786
162-982A-15H-3-A 66	135.36	152.64	152.35	5.10757	5.08654	1998	49	7.5999
162-982A-15H-3-A 67	135.37	152.65	152.36	5.10773	5.08676	2010	58	7.60589
162-982A-15H-3-A 70	135.4	152.68	152.39	5.10824	5.08739	2036	42	7.61874
162-982A-15H-3-A 71	135.41	152.69	152.4	5.1084	5.0876	2411	71	7.7878
162-982A-15H-3-A 74	135.44	152.72	152.43	5.10891	5.08823	2102	107	7.65064
162-982A-15H-3-A 76	135.46	152.74	152.45	5.10924	5.08866	1945	38	7.57302
162-982A-15H-3-A 77	135.47	152.75	152.46	5.10941	5.08887	1755	80	7.47022
162-982A-15H-3-A 80	135.5	152.78	152.49	5.10991	5.0895	1992	48	7.59689
162-982A-15H-3-A 81	135.51	152.79	152.5	5.11008	5.08971	1788	5	7.48885
162-982A-15H-3-A 84	135.54	152.82	152.53	5.11058	5.09034	1793	61	7.49165
162-982A-15H-3-A 85	135.55	152.83	152.54	5.11075	5.09056	1905	38	7.55224
162-982A-15H-3-A 88	135.58	152.86	152.57	5.11125	5.09119	1763	55	7.47477
162-982A-15H-3-A 90	135.6	152.88	152.59	5.11158	5.09161	1851	33	7.52348
162-982A-15H-3-A 93	135.63	152.91	152.62	5.11209	5.09224	1989	54	7.59539
162-982A-15H-3-A 94	135.64	152.92	152.63	5.11225	5.09246	2175	61	7.68478
162-982A-15H-3-A 96	135.66	152.94	152.65	5.11259	5.09288	2114	66	7.65634
162-982A-15H-3-A 99	135.69	152.97	152.68	5.11309	5.09351	2442	49	7.80057
162-982A-15H-3-A 102	135.72	153	152.71	5.11359	5.09414	2318	41	7.74846
162-982A-15H-3-A 104	135.74	153.02	152.73	5.11393	5.09457	2329	83	7.75319
162-982A-15H-3-A 107	135.77	153.05	152.76	5.11443	5.0952	2442	6	7.80057
162-982A-15H-3-A 108	135.78	153.06	152.77	5.1146	5.09541	2435	44	7.7977
162-982A-15H-3-A 109	135.79	153.07	152.78	5.11477	5.09562	2452	112	7.80466
162-982A-15H-3-A 112	135.82	153.1	152.81	5.11527	5.09626	2547	36	7.84267
162-982A-15H-3-A 114	135.84	153.12	152.83	5.1156	5.09668	2537	72	7.83874
162-982A-15H-3-A 116	135.86	153.14	152.85	5.11594	5.0971	2667	41	7.88871
162-982A-15H-3-A 119	135.89	153.17	152.88	5.11644	5.09773	2822	62	7.9452
162-982A-15H-3-A 120	135.9	153.18	152.89	5.11661	5.09794	2862	61	7.95928
162-982A-15H-3-A 122	135.92	153.2	152.91	5.11694	5.09837	2894	18	7.97039
162-982A-15H-3-A 124	135.94	153.22	152.93	5.11728	5.09879	2790	91	7.9338
162-982A-15H-3-A 127	135.97	153.25	152.96	5.11778	5.09942	2913	58	7.97694
162-982A-15H-3-A 128	135.98	153.26	152.97	5.11795	5.09963	2995	57	8.0047
162-982A-15H-3-A 130	136	153.28	152.99	5.11828	5.10006	2681	32	7.89395
162-982A-15H-3-A 131	136.01	153.29	153	5.11845	5.10027	2629	48	7.87436
162-982A-15H-3-A 135	136.05	153.33	153.04	5.11912	5.10111	2771	71	7.92696
162-982A-15H-3-A 136	136.06	153.34	153.05	5.11929	5.10132	2614	27	7.86864
162-982A-15H-3-A 138	136.08	153.36	153.07	5.11962	5.10174	2597	59	7.86211
162-982A-15H-3-A 140	136.1	153.38	153.09	5.11996	5.10217	2722	30	7.90912
162-982A-15H-3-A 141	136.11	153.39	153.1	5.12012	5.10238	2654	66	7.88382
162-982A-15H-3-A 142	136.12	153.4	153.11	5.12029	5.10259	2576	64	7.85399
162-982A-15H-3-A 144	136.14	153.42	153.13	5.12063	5.10301	2771	67	7.92696
162-982A-15H-3-A 145	136.15	153.43	153.14	5.12079	5.10322	2789	57	7.93344
162-982A-15H-3-A 146	136.16	153.44	153.15	5.12096	5.10343	2617	83	7.86978
162-982A-15H-3-A 147	136.17	153.45	153.16	5.12113	5.10364	2426	54	7.794
162-982A-15H-4-A 2	136.2	153.48	153.19	5.12163	5.10428	2520	31	7.83201
162-982A-15H-4-A 4	136.22	153.5	153.21	5.12197	5.1047	2313	40	7.7463
162-982A-15H-4-A 6	136.24	153.52	153.23	5.1223	5.10512	1953	10	7.57712
162-982A-15H-4-A 8	136.26	153.54	153.25	5.12264	5.10554	1787	77	7.48829
162-982A-15H-4-A 9	136.27	153.55	153.26	5.1228	5.10576	1847	24	7.52132
162-982A-15H-4-A 12	136.3	153.58	153.29	5.12331	5.10639	1754	97	7.46965
162-982A-15H-4-A 14	136.32	153.6	153.31	5.12364	5.10681	1610	53	7.38399
162-982A-15H-4-A 17	136.35	153.63	153.34	5.12414	5.10744	1371	53	7.2233
162-982A-15H-4-A 19	136.37	153.65	153.36	5.12448	5.10787	1444	19	7.27517
162-982A-15H-4-A 20	136.38	153.66	153.37	5.12465	5.10808	1499	44	7.31255
162-982A-15H-4-A 21	136.39	153.67	153.38	5.12481	5.10829	1495	79	7.30988
162-982A-15H-4-A 22	136.4	153.68	153.39	5.12498	5.1085	1268	19	7.1452
162-982A-15H-4-A 25	136.43	153.71	153.42	5.12548	5.10913	1565	31	7.35564
162-982A-15H-4-A 26	136.44	153.72	153.43	5.12565	5.10934	1503	51	7.31522
162-982A-15H-4-A 29	136.47	153.75	153.46	5.12615	5.10998	1449	47	7.27863
162-982A-15H-4-A 30	136.48	153.76	153.47	5.12632	5.11019	1379	30	7.22911
162-982A-15H-4-A 32	136.5	153.78	153.49	5.12665	5.11061	1398	33	7.2428
162-982A-15H-4-A 34	136.52	153.8	153.51	5.12699	5.11103	1553	55	7.34794
162-982A-15H-4-A 37	136.55	153.83	153.54	5.12749	5.11167	1391	-10	7.23778
162-982A-15H-4-A 39	136.57	153.85	153.56	5.12783	5.11209	1535	65	7.33629
162-982A-15H-4-A 40	136.58	153.86	153.57	5.12799	5.1123	1871	46	7.53423
162-982A-15H-4-A 43	136.61	153.89	153.6	5.1285	5.11293	1354	78	7.21082
162-982A-15H-4-A 46	136.64	153.92	153.63	5.129	5.11357	1505	57	7.31655
162-982A-15H-4-A 49	136.67	153.95	153.66	5.1295	5.1142	1382	10	7.23129
162-982A-15H-4-A 50	136.68	153.96	153.67	5.12967	5.11441	1424	55	7.26123
162-982A-15H-4-A 54	136.72	154	153.71	5.13034	5.11526	1737	31	7.45991
162-982A-15H-4-A 56	136.74	154.02	153.73	5.13067	5.11568	1510	23	7.31986
162-982A-15H-4-A 58	136.76	154.04	153.75	5.13101	5.1161	1335	24	7.19669
162-982A-15H-4-A 59	136.77	154.05	153.76	5.13118	5.11631	1235	43	7.11883
162-982A-15H-4-A 61	136.79	154.07	153.78	5.13151	5.11673	1333	51	7.19519
162-982A-15H-4-A 64	136.82	154.1	153.81	5.13201	5.11737	1361	30	7.21598
162-982A-15H-4-A 66	136.84	154.12	153.83	5.13235	5.11779	1692	39	7.43367
162-982A-15H-4-A 67	136.85	154.13	153.84	5.13252	5.118	1502	64	7.31455
162-982A-15H-4-A 70	136.88	154.16	153.87	5.13302	5.11879	1529	42	7.33237
162-982A-15H-4-A 72	136.9	154.18	153.89	5.13335	5.11932	1390	42	7.23706
162-982A-15H-4-A 74	136.92	154.2	153.91	5.13369	5.11985	1619	33	7.38956
162-982A-15H-4-A 75	136.93	154.21	153.92	5.13385	5.12011	1596	43	7.37526
162-982A-15H-4-A 78	136.96	154.24	153.95	5.13436	5.12091	1689	75	7.43189
162-982A-15H-4-A 80	136.98	154.26	153.97	5.13469	5.12143	1753	44	7.46908
162-982A-15H-4-A 83	137.01	154.29	154	5.13519	5.12223	1916	53	7.55799
162-982A-15H-4-A 84	137.02	154.3	154.01	5.13536	5.12249	1811	82	7.50163
162-982A-15H-4-A 87	137.05	154.33	154.04	5.13586	5.12328	1893	37	7.54592
162-982A-15H-4-A 88	137.06	154.34	154.05	5.13603	5.12355	1856	37	7.52618
162-982A-15H-4-A 91	137.09	154.37	154.08	5.13653	5.12434	2318	53	7.74846
162-982A-15H-4-A 92	137.1	154.38	154.09	5.1367	5.1246	2029	52	7.6153
162-982A-15H-4-A 94.5	137.13	154.41	154.12	5.1372	5.1254	2570	22	7.85166
162-982A-15H-4-A 97	137.15	154.43	154.14	5.13754	5.12592	2989	43	8.00269
162-982A-15H-4-A 98	137.16	154.44	154.15	5.13771	5.12619	2781	54	7.93057
162-982A-15H-4-A 101	137.19	154.47	154.18	5.13821	5.12698	2665	19	7.88796
162-982A-15H-4-A 102	137.2	154.48	154.19	5.13838	5.12725	2693	17	7.89841
162-982A-15H-4-A 103	137.21	154.49	154.2	5.13854	5.12751	2773	44	7.92769
162-982A-15H-4-A 106	137.24	154.52	154.23	5.13905	5.1283	2554	58	7.84542
162-982A-15H-4-A 108	137.26	154.54	154.25	5.13938	5.12883	2215	23	7.70301
162-982A-15H-4-A 110	137.28	154.56	154.27	5.13972	5.12936	2280	72	7.73193
162-982A-15H-4-A 112	137.3	154.58	154.29	5.14005	5.12989	2120	55	7.65917
162-982A-15H-4-A 115	137.33	154.61	154.32	5.14055	5.13068	1802	48	7.49665
162-982A-15H-4-A 116	137.34	154.62	154.33	5.14072	5.13094	1868	71	7.53262
162-982A-15H-4-A 118	137.36	154.64	154.35	5.14105	5.13147	1930	38	7.56528
162-982A-15H-4-A 121	137.39	154.67	154.38	5.14156	5.13226	1750	-4	7.46737
162-982A-15H-4-A 123	137.41	154.69	154.4	5.14189	5.13279	1653	44	7.41035
162-982A-15H-4-A 124	137.42	154.7	154.41	5.14206	5.13306	1652	55	7.40974
162-982A-15H-4-A 127	137.45	154.73	154.44	5.14256	5.13385	1693	41	7.43426
162-982A-15H-4-A 128	137.46	154.74	154.45	5.14273	5.13411	1425	-6	7.26193
162-982A-15H-4-A 130	137.48	154.76	154.47	5.14306	5.13464	1743	67	7.46336
162-982A-15H-4-A 131	137.49	154.77	154.48	5.14323	5.13491	1527	38	7.33106
162-982A-15H-4-A 136	137.54	154.82	154.53	5.14407	5.13623	1710	73	7.44425
162-982A-15H-4-A 138	137.56	154.84	154.55	5.1444	5.13675	1430	52	7.26543
162-982A-15H-4-A 139	137.57	154.85	154.56	5.14457	5.13702	1538	75	7.33824
162-982A-15H-4-A 140	137.58	154.86	154.57	5.14474	5.13728	1617	44	7.38833
162-982A-15H-5-A 2	137.7	154.98	154.69	5.14675	5.14045	2371	69	7.77107
162-982A-15H-5-A 4	137.72	155	154.71	5.14708	5.14098	2400	50	7.78322
162-982A-15H-5-A 6	137.74	155.02	154.73	5.14742	5.14151	2567	42	7.85049
162-982A-15H-5-A 9	137.77	155.05	154.76	5.14792	5.1423	2546	31	7.84228
162-982A-15H-5-A 10	137.78	155.06	154.77	5.14809	5.14257	2608	44	7.86634
162-982A-15H-5-A 13	137.81	155.09	154.8	5.14859	5.14336	2596	72	7.86173
162-982A-15H-5-A 14	137.82	155.1	154.81	5.14876	5.14362	2446	43	7.80221
162-982A-15H-5-A 17	137.85	155.13	154.84	5.14926	5.14442	2783	64	7.93128
162-982A-15H-5-A 18	137.86	155.14	154.85	5.14943	5.14468	2888	50	7.96832
162-982A-15H-5-A 20.5	137.89	155.17	154.88	5.14993	5.14547	2967	48	7.99531
162-982A-15H-5-A 23	137.91	155.19	154.9	5.15026	5.146	2975	52	7.998
162-982A-15H-5-A 24	137.92	155.2	154.91	5.15043	5.14626	3103	89	8.04012
162-982A-15H-5-A 27	137.95	155.23	154.94	5.15093	5.14706	3555	79	8.17611
162-982A-15H-5-A 28	137.96	155.24	154.95	5.1511	5.14732	4137	73	8.32773
162-982A-15H-5-A 30	137.98	155.26	154.97	5.15144	5.14785	4603	91	8.43446
162-982A-15H-5-A 32.5	138.01	155.29	155	5.15194	5.14864	5228	164	8.56178
162-982A-15H-5-A 35	138.03	155.31	155.02	5.15227	5.14917	6136	134	8.72193
162-982A-15H-5-A 36	138.04	155.32	155.03	5.15244	5.14943	6085	131	8.71358
162-982A-15H-5-A 37	138.05	155.33	155.04	5.15261	5.1497	5662	121	8.64153
162-982A-15H-5-A 40	138.08	155.36	155.07	5.15311	5.15049	2446	53	7.80221
162-982A-15H-5-A 41	138.09	155.37	155.08	5.15328	5.15075	2446	52	7.80221
162-982A-15H-5-A 44	138.12	155.4	155.11	5.15378	5.15155	3501	54	8.1608
162-982A-15H-5-A 45	138.13	155.41	155.12	5.15395	5.15181	3468	111	8.15133
162-982A-15H-5-A 47.5	138.16	155.44	155.15	5.15445	5.1526	2746	36	7.9179
162-982A-15H-5-A 50	138.18	155.46	155.17	5.15479	5.15313	3368	47	8.12207
162-982A-15H-5-A 52	138.2	155.48	155.19	5.15512	5.15366	3174	48	8.06275
162-982A-15H-5-A 53	138.21	155.49	155.2	5.15529	5.15392	2966	39	7.99497
162-982A-15H-5-A 56	138.24	155.52	155.23	5.15579	5.15472	2133	45	7.66528
162-982A-15H-5-A 57	138.25	155.53	155.24	5.15596	5.15498	2169	22	7.68202
162-982A-15H-5-A 60	138.28	155.56	155.27	5.15646	5.15577	2319	41	7.74889
162-982A-15H-5-A 63	138.31	155.59	155.3	5.15696	5.15657	2213	55	7.7021
162-982A-15H-5-A 64	138.32	155.6	155.31	5.15713	5.15683	1986	41	7.59388
162-982A-15H-5-A 67	138.35	155.63	155.34	5.15763	5.15762	2223	16	7.70661
162-982A-15H-5-A 68	138.36	155.64	155.35	5.1578	5.15789	2249	53	7.71824
162-982A-15H-5-A 69	138.37	155.65	155.36	5.15797	5.15815	2036	45	7.61874
162-982A-15H-5-A 72	138.4	155.68	155.39	5.15847	5.15894	2174	61	7.68432
162-982A-15H-5-A 73	138.41	155.69	155.4	5.15864	5.15921	2160	45	7.67786
162-982A-15H-5-A 74	138.42	155.7	155.41	5.1588	5.15947	2123	66	7.66059
162-982A-15H-5-A 77	138.45	155.73	155.44	5.15931	5.16016	2232	75	7.71065
162-982A-15H-5-A 78	138.46	155.74	155.45	5.15947	5.16033	2248	44	7.7178
162-982A-15H-5-A 80	138.48	155.76	155.47	5.15981	5.16066	2256	49	7.72135
162-982A-15H-5-A 82	138.5	155.78	155.49	5.16014	5.16098	2299	55	7.74023
162-982A-15H-5-A 84	138.52	155.8	155.51	5.16048	5.16131	2242	64	7.71512
162-982A-15H-5-A 87	138.55	155.83	155.54	5.16098	5.1618	2382	62	7.7757
162-982A-15H-5-A 88	138.56	155.84	155.55	5.16115	5.16197	2489	47	7.81964
162-982A-15H-5-A 90	138.58	155.86	155.57	5.16148	5.1623	2159	41	7.6774
162-982A-15H-5-A 91	138.59	155.87	155.58	5.16165	5.16246	2134	57	7.66575
162-982A-15H-5-A 92	138.6	155.88	155.59	5.16182	5.16262	2199	36	7.69576
162-982A-15H-5-A 94	138.62	155.9	155.61	5.16215	5.16295	2198	57	7.6953
162-982A-15H-5-A 96	138.64	155.92	155.63	5.16249	5.16328	2113	47	7.65586
162-982A-15H-5-A 98	138.66	155.94	155.65	5.16282	5.16361	2276	41	7.73017
162-982A-15H-5-A 101	138.69	155.97	155.68	5.16332	5.1641	2143	52	7.66996
162-982A-15H-5-A 102	138.7	155.98	155.69	5.16349	5.16426	2059	49	7.62998
162-982A-15H-5-A 104	138.72	156	155.71	5.16383	5.16459	2144	42	7.67043
162-982A-15H-5-A 105	138.73	156.01	155.72	5.16399	5.16476	1988	36	7.59488
162-982A-15H-5-A 108	138.76	156.04	155.75	5.1645	5.16525	2113	38	7.65586
162-982A-15H-5-A 110	138.78	156.06	155.77	5.16483	5.16558	2048	55	7.62462
162-982A-15H-5-A 111	138.79	156.07	155.78	5.165	5.16574	2231	35	7.71021
162-982A-15H-5-A 114	138.82	156.1	155.81	5.1655	5.16623	2448	33	7.80303
162-982A-15H-5-A 115	138.83	156.11	155.82	5.16567	5.1664	2616	75	7.8694
162-982A-15H-5-A 118	138.86	156.14	155.85	5.16617	5.16689	2557	65	7.84659
162-982A-15H-5-A 120	138.88	156.16	155.87	5.16651	5.16722	2756	18	7.92154
162-982A-15H-5-A 123	138.91	156.19	155.9	5.16701	5.16771	2837	41	7.9505
162-982A-15H-5-A 125	138.93	156.21	155.92	5.16734	5.16804	2962	37	7.99362
162-982A-15H-5-A 126	138.94	156.22	155.93	5.16751	5.1682	3151	61	8.05548
162-982A-15H-5-A 128	138.96	156.24	155.95	5.16785	5.16853	2966	57	7.99497
162-982A-15H-5-A 130	138.98	156.26	155.97	5.16818	5.16886	2914	60	7.97728
162-982A-15H-5-A 131	138.99	156.27	155.98	5.16835	5.16902	2873	43	7.96311
162-982A-15H-5-A 134	139.02	156.3	156.01	5.16885	5.16951	3009	30	8.00936
162-982A-15H-5-A 136	139.04	156.32	156.03	5.16919	5.16984	3196	28	8.06966
162-982A-15H-5-A 139	139.07	156.35	156.06	5.16969	5.17033	3146	89	8.05389
162-982A-15H-5-A 140	139.08	156.36	156.07	5.16986	5.1705	3148	36	8.05452
162-982A-15H-5-A 141	139.09	156.37	156.08	5.17002	5.17066	3357	81	8.1188
162-982A-15H-5-A 144	139.12	156.4	156.11	5.17053	5.17115	3262	67	8.0901
162-982A-15H-5-A 146	139.14	156.42	156.13	5.17086	5.17148	3140	77	8.05198
162-982A-15H-5-A 148	139.16	156.44	156.15	5.17119	5.17181	2662	27	7.88683
162-982A-15H-6-A 3	139.21	156.49	156.2	5.17203	5.17263	2522	90	7.83281
162-982A-15H-6-A 4	139.22	156.5	156.21	5.1722	5.17279	2854	91	7.95648
162-982A-15H-6-A 6	139.24	156.52	156.23	5.17253	5.17312	2731	42	7.91242
162-982A-15H-6-A 8	139.26	156.54	156.25	5.17287	5.17345	2579	-22	7.85516
162-982A-15H-6-A 10	139.28	156.56	156.27	5.1732	5.17378	2422	66	7.79235
162-982A-15H-6-A 11	139.29	156.57	156.28	5.17337	5.17394	2689	19	7.89692
162-982A-15H-6-A 12	139.3	156.58	156.29	5.17354	5.1741	2454	55	7.80547
162-982A-15H-6-A 14	139.32	156.6	156.31	5.17387	5.17443	2063	24	7.63192
162-982A-15H-6-A 16	139.34	156.62	156.33	5.17421	5.17476	2217	48	7.70391
162-982A-15H-6-A 19	139.37	156.65	156.36	5.17471	5.17525	2035	26	7.61825
162-982A-15H-6-A 20	139.38	156.66	156.37	5.17488	5.17542	1787	48	7.48829
162-982A-15H-6-A 21	139.39	156.67	156.38	5.17505	5.17558	1914	60	7.55695
162-982A-15H-6-A 24	139.42	156.7	156.41	5.17555	5.17607	1880	25	7.53903
162-982A-15H-6-A 26	139.44	156.72	156.43	5.17588	5.1764	1919	67	7.55956
162-982A-15H-6-A 28	139.46	156.74	156.45	5.17622	5.17673	1775	52	7.48156
162-982A-15H-6-A 29	139.47	156.75	156.46	5.17639	5.17689	1594	40	7.374
162-982A-15H-6-A 32	139.5	156.78	156.49	5.17689	5.17738	1581	41	7.36581
162-982A-15H-6-A 34	139.52	156.8	156.51	5.17722	5.17771	1517	38	7.32449
162-982A-15H-6-A 38	139.56	156.84	156.55	5.17789	5.17837	1522	16	7.32778
162-982A-15H-6-A 39	139.57	156.85	156.56	5.17806	5.17853	1542	32	7.34084
162-982A-15H-6-A 42	139.6	156.88	156.59	5.17856	5.17902	1470	46	7.29302
162-982A-15H-6-A 45	139.63	156.91	156.62	5.17906	5.17952	1356	39	7.21229
162-982A-15H-6-A 46	139.64	156.92	156.63	5.17923	5.17968	1542	38	7.34084
162-982A-15H-6-A 48.5	139.67	156.95	156.66	5.17973	5.18017	1638	50	7.40123
162-982A-15H-6-A 51	139.69	156.97	156.68	5.18007	5.1805	1583	36	7.36708
162-982A-15H-6-A 52	139.7	156.98	156.69	5.18024	5.18066	1455	61	7.28276
162-982A-15H-6-A 54	139.72	157	156.71	5.18057	5.18099	1387	30	7.2349
162-982A-15H-6-A 58	139.76	157.04	156.75	5.18124	5.18165	1525	77	7.32975
162-982A-15H-6-A 63	139.81	157.09	156.8	5.18208	5.18247	1253	42	7.1333
162-982A-15H-6-A 64	139.82	157.1	156.81	5.18225	5.18263	1363	80	7.21744
162-982A-15H-6-A 68	139.86	157.14	156.85	5.18292	5.18329	1486	23	7.30384
162-982A-15H-6-A 69	139.87	157.15	156.86	5.18308	5.18345	1540	58	7.33954
162-982A-15H-6-A 71.5	139.9	157.18	156.89	5.18359	5.18394	1532	41	7.33433
162-982A-15H-6-A 76	139.94	157.22	156.93	5.18426	5.1846	1353	27	7.21008
162-982A-15H-6-A 78.5	139.97	157.25	156.96	5.18476	5.18509	1280	44	7.15462
162-982A-15H-6-A 81	139.99	157.27	156.98	5.18509	5.18542	1432	61	7.26683
162-982A-15H-6-A 84	140.02	157.3	157.01	5.1856	5.18591	1258	43	7.13728
162-982A-15H-6-A 87	140.05	157.33	157.04	5.1861	5.1864	1325	-15	7.18917
162-982A-15H-6-A 91	140.09	157.37	157.08	5.18677	5.18706	1245	40	7.12689
162-982A-15H-6-A 92	140.1	157.38	157.09	5.18693	5.18722	1204	38	7.0934
162-982A-15H-6-A 96	140.14	157.42	157.13	5.1876	5.18788	1303	36	7.17242
162-982A-15H-6-A 97	140.15	157.43	157.14	5.18777	5.18804	1410	44	7.25134
162-982A-15H-6-A 100	140.18	157.46	157.17	5.18827	5.18854	1253	33	7.1333
162-982A-15H-6-A 104	140.22	157.5	157.21	5.18894	5.18919	1311	55	7.17855
162-982A-15H-6-A 105	140.23	157.51	157.22	5.18911	5.18936	1340	27	7.20042
162-982A-15H-6-A 110	140.28	157.56	157.27	5.18995	5.19018	1327	32	7.19068
162-982A-15H-6-A 114	140.32	157.6	157.31	5.19062	5.19083	1294	14	7.16549
162-982A-15H-6-A 116	140.34	157.62	157.33	5.19095	5.19116	1441	44	7.27309
162-982A-16H-1-A 16	141.36	159.48	159.33	5.23258	5.23258	2253	48	7.72002
162-982A-16H-1-A 18	141.38	159.5	159.35	5.23303	5.23303	2370	22	7.77065
162-982A-16H-1-A 20	141.4	159.52	159.37	5.23348	5.23348	2344	50	7.75961
162-982A-16H-1-A 23	141.43	159.55	159.4	5.23416	5.23416	2496	23	7.82244
162-982A-16H-1-A 24	141.44	159.56	159.41	5.23438	5.23438	2423	53	7.79276
162-982A-16H-1-A 26	141.46	159.58	159.43	5.23483	5.23483	2455	40	7.80588
162-982A-16H-1-A 28	141.48	159.6	159.45	5.23529	5.23529	2457	62	7.8067
162-982A-16H-1-A 31	141.51	159.63	159.48	5.23596	5.23596	2428	45	7.79482
162-982A-16H-1-A 32	141.52	159.64	159.49	5.23619	5.23619	2597	56	7.86211
162-982A-16H-1-A 34	141.54	159.66	159.51	5.23664	5.23664	2344	59	7.75961
162-982A-16H-1-A 37	141.57	159.69	159.54	5.23732	5.23732	2291	38	7.73674
162-982A-16H-1-A 38	141.58	159.7	159.55	5.23754	5.23754	2569	37	7.85127
162-982A-16H-1-A 39.5	141.6	159.72	159.57	5.23799	5.23799	2283	61	7.73325
162-982A-16H-1-A 42	141.62	159.74	159.59	5.23844	5.23844	2166	93	7.68064
162-982A-16H-1-A 44	141.64	159.76	159.61	5.23889	5.23889	2380	31	7.77486
162-982A-16H-1-A 47	141.67	159.79	159.64	5.23957	5.23957	2206	55	7.69894
162-982A-16H-1-A 48	141.68	159.8	159.65	5.2398	5.2398	2326	68	7.75191
162-982A-16H-1-A 50	141.7	159.82	159.67	5.24025	5.24025	2248	66	7.7178
162-982A-16H-1-A 54	141.74	159.86	159.71	5.24115	5.24115	1919	34	7.55956
162-982A-16H-1-A 56	141.76	159.88	159.73	5.2416	5.2416	3055	41	8.02453
162-982A-16H-1-A 57	141.77	159.89	159.74	5.24183	5.24183	1903	25	7.55119
162-982A-16H-1-A 60	141.8	159.92	159.77	5.2425	5.2425	2019	52	7.61036
162-982A-16H-1-A 62	141.82	159.94	159.79	5.24295	5.24295	1993	50	7.5974
162-982A-16H-1-A 63	141.83	159.95	159.8	5.24318	5.24318	1876	17	7.5369
162-982A-16H-1-A 66	141.86	159.98	159.83	5.24386	5.24386	1534	38	7.33563
162-982A-16H-1-A 68	141.88	160	159.85	5.24431	5.24431	1852	37	7.52402
162-982A-16H-1-A 70	141.9	160.02	159.87	5.24476	5.24476	1666	53	7.41818
162-982A-16H-1-A 73	141.93	160.05	159.9	5.24544	5.24544	1574	15	7.36138
162-982A-16H-1-A 74	141.94	160.06	159.91	5.24566	5.24566	1573	55	7.36074
162-982A-16H-1-A 75	141.95	160.07	159.92	5.24589	5.24589	1600	53	7.37776
162-982A-16H-1-A 78	141.98	160.1	159.95	5.24656	5.24656	1728	68	7.45472
162-982A-16H-1-A 80	142	160.12	159.97	5.24702	5.24702	1914	37	7.55695
162-982A-16H-1-A 82	142.02	160.14	159.99	5.24747	5.24747	1873	36	7.5353
162-982A-16H-1-A 85	142.05	160.17	160.02	5.24814	5.24814	2147	18	7.67183
162-982A-16H-1-A 86	142.06	160.18	160.03	5.24837	5.24837	1973	37	7.58731
162-982A-16H-1-A 88	142.08	160.2	160.05	5.24882	5.24882	1969	36	7.58528
162-982A-16H-1-A 90	142.1	160.22	160.07	5.24927	5.24927	2011	27	7.60639
162-982A-16H-1-A 94	142.14	160.26	160.11	5.25017	5.25017	1905	22	7.55224
162-982A-16H-1-A 97	142.17	160.29	160.14	5.25085	5.25085	1817	44	7.50494
162-982A-16H-1-A 98	142.18	160.3	160.15	5.25108	5.25108	2033	75	7.61727
162-982A-16H-1-A 100	142.2	160.32	160.17	5.25153	5.25153	1825	64	7.50934
162-982A-16H-1-A 102	142.22	160.34	160.19	5.25198	5.25198	1714	47	7.44659
162-982A-16H-1-A 104	142.24	160.36	160.21	5.25243	5.25243	2032	55	7.61678
162-982A-16H-1-A 106	142.26	160.38	160.23	5.25288	5.25288	1904	31	7.55171
162-982A-16H-1-A 107	142.27	160.39	160.24	5.25311	5.25311	1866	19	7.53155
162-982A-16H-1-A 111	142.31	160.43	160.28	5.25401	5.25401	1884	74	7.54115
162-982A-16H-1-A 112	142.32	160.44	160.29	5.25423	5.25423	1796	36	7.49332
162-982A-16H-1-A 113	142.33	160.45	160.3	5.25446	5.25446	1945	52	7.57302
162-982A-16H-1-A 117	142.37	160.49	160.34	5.25536	5.25536	1822	53	7.50769
162-982A-16H-1-A 118	142.38	160.5	160.35	5.25559	5.25559	1865	41	7.53102
162-982A-16H-1-A 121	142.41	160.53	160.38	5.25626	5.25626	1736	28	7.45934
162-982A-16H-1-A 122	142.42	160.54	160.39	5.25649	5.25649	1812	30	7.50219
162-982A-16H-1-A 124	142.44	160.56	160.41	5.25694	5.25694	1883	83	7.54062
162-982A-16H-1-A 126	142.46	160.58	160.43	5.25739	5.25739	1779	32	7.48381
162-982A-16H-1-A 127	142.47	160.59	160.44	5.25762	5.25762	1831	31	7.51262
162-982A-16H-1-A 130	142.5	160.62	160.47	5.25829	5.25829	2037	27	7.61923
162-982A-16H-1-A 132	142.52	160.64	160.49	5.25874	5.25874	1822	19	7.50769
162-982A-16H-1-A 135	142.55	160.67	160.52	5.25942	5.25942	2044	34	7.62266
162-982A-16H-1-A 136	142.56	160.68	160.53	5.25965	5.25965	2111	45	7.65492
162-982A-16H-1-A 137	142.57	160.69	160.54	5.25987	5.25987	2063	42	7.63192
162-982A-16H-1-A 138	142.58	160.7	160.55	5.2601	5.2601	2157	50	7.67647
162-982A-16H-1-A 141	142.61	160.73	160.58	5.26077	5.26077	2262	66	7.724
162-982A-16H-1-A 142	142.62	160.74	160.59	5.261	5.261	2346	30	7.76047
162-982A-16H-1-A 144	142.64	160.76	160.61	5.26145	5.26145	2424	44	7.79317
162-982A-16H-1-A 146	142.66	160.78	160.63	5.2619	5.2619	2341	38	7.75833
162-982A-16H-1-A 148	142.68	160.8	160.65	5.26235	5.26235	2354	24	7.76387
162-982A-16H-1-A 149.5	142.7	160.82	160.67	5.2628	5.2628	2308	52	7.74414
162-982A-16H-2-A 2	142.72	160.84	160.69	5.26326	5.26326	2534	63	7.83755
162-982A-16H-2-A 4	142.74	160.86	160.71	5.26371	5.26371	2291	69	7.73674
162-982A-16H-2-A 6	142.76	160.88	160.73	5.26416	5.26416	2173	45	7.68386
162-982A-16H-2-A 8	142.78	160.9	160.75	5.26461	5.26461	2366	51	7.76896
162-982A-16H-2-A 10	142.8	160.92	160.77	5.26506	5.26506	2166	83	7.68064
162-982A-16H-2-A 12	142.82	160.94	160.79	5.26551	5.26551	2204	27	7.69803
162-982A-16H-2-A 14	142.84	160.96	160.81	5.26596	5.26596	2148	40	7.67229
162-982A-16H-2-A 16	142.86	160.98	160.83	5.26641	5.26641	2010	55	7.60589
162-982A-16H-2-A 17	142.87	160.99	160.84	5.26664	5.26664	2003	58	7.6024
162-982A-16H-2-A 20.5	142.91	161.03	160.88	5.26754	5.26754	2074	50	7.63723
162-982A-16H-2-A 21.5	142.92	161.04	160.89	5.26777	5.26777	1660	24	7.41457
162-982A-16H-2-A 24	142.94	161.06	160.91	5.26822	5.26822	1783	83	7.48605
162-982A-16H-2-A 26	142.96	161.08	160.93	5.26867	5.26867	1800	65	7.49554
162-982A-16H-2-A 28	142.98	161.1	160.95	5.26912	5.26912	1766	60	7.47647
162-982A-16H-2-A 30	143	161.12	160.97	5.26957	5.26957	1773	47	7.48043
162-982A-16H-2-A 32	143.02	161.14	160.99	5.27002	5.27002	1884	41	7.54115
162-982A-16H-2-A 34	143.04	161.16	161.01	5.27047	5.27047	1774	47	7.48099
162-982A-16H-2-A 36	143.06	161.18	161.03	5.27092	5.27092	1770	54	7.47873
162-982A-16H-2-A 40	143.1	161.22	161.07	5.27183	5.27183	2006	21	7.6039
162-982A-16H-2-A 42	143.12	161.24	161.09	5.27228	5.27228	1700	49	7.43838
162-982A-16H-2-A 44	143.14	161.26	161.11	5.27273	5.27273	1916	44	7.55799
162-982A-16H-2-A 46	143.16	161.28	161.13	5.27318	5.27318	2062	66	7.63143
162-982A-16H-2-A 48	143.18	161.3	161.15	5.27363	5.27363	1943	66	7.57199
162-982A-16H-2-A 51	143.21	161.33	161.18	5.27431	5.27431	1877	34	7.53743
162-982A-16H-2-A 52	143.22	161.34	161.19	5.27453	5.27453	1805	48	7.49832
162-982A-16H-2-A 54	143.24	161.36	161.21	5.27498	5.27498	1844	59	7.51969
162-982A-16H-2-A 59	143.29	161.41	161.26	5.27611	5.27611	2083	33	7.64156
162-982A-16H-2-A 60	143.3	161.42	161.27	5.27634	5.27634	2197	62	7.69485
162-982A-16H-2-A 63	143.33	161.45	161.3	5.27702	5.27702	2177	68	7.6857
162-982A-16H-2-A 64	143.34	161.46	161.31	5.27724	5.27724	2047	48	7.62413
162-982A-16H-2-A 66	143.36	161.48	161.33	5.27769	5.27769	1825	19	7.50934
162-982A-16H-2-A 68	143.38	161.5	161.35	5.27814	5.27814	1840	45	7.51752
162-982A-16H-2-A 70	143.4	161.52	161.37	5.27859	5.27859	1850	74	7.52294
162-982A-16H-2-A 72	143.42	161.54	161.39	5.27905	5.27905	1736	40	7.45934
162-982A-16H-2-A 73	143.43	161.55	161.4	5.27927	5.27927	1639	42	7.40184
162-982A-16H-2-A 77	143.47	161.59	161.44	5.28017	5.28017	1832	19	7.51316
162-982A-16H-2-A 78	143.48	161.6	161.45	5.2804	5.2804	1639	60	7.40184
162-982A-16H-2-A 80	143.5	161.62	161.47	5.28085	5.28085	1841	47	7.51806
162-982A-16H-2-A 83	143.53	161.65	161.5	5.28153	5.28153	1736	21	7.45934
162-982A-16H-2-A 84	143.54	161.66	161.51	5.28175	5.28175	1732	41	7.45703
162-982A-16H-2-A 86	143.56	161.68	161.53	5.2822	5.2822	1979	48	7.59035
162-982A-16H-2-A 88	143.58	161.7	161.55	5.28265	5.28265	2086	66	7.643
162-982A-16H-2-A 89	143.59	161.71	161.56	5.28288	5.28288	1881	50	7.53956
162-982A-16H-2-A 97	143.67	161.79	161.64	5.28468	5.28468	2579	65	7.85516
162-982A-16H-2-A 98	143.68	161.8	161.65	5.28491	5.28491	2484	22	7.81763
162-982A-16H-2-A 100	143.7	161.82	161.67	5.28536	5.28536	2324	51	7.75105
162-982A-16H-2-A 103	143.73	161.85	161.7	5.28604	5.28604	2339	34	7.75748
162-982A-16H-2-A 104	143.74	161.86	161.71	5.28626	5.28626	2314	12	7.74673
162-982A-16H-2-A 106	143.76	161.88	161.73	5.28671	5.28671	2402	93	7.78406
162-982A-16H-2-A 109	143.79	161.91	161.76	5.28739	5.28739	2498	52	7.82325
162-982A-16H-2-A 110	143.8	161.92	161.77	5.28762	5.28762	2618	51	7.87017
162-982A-16H-2-A 112	143.82	161.94	161.79	5.28807	5.28807	2634	68	7.87626
162-982A-16H-2-A 114	143.84	161.96	161.81	5.28852	5.28852	2415	47	7.78945
162-982A-16H-2-A 116	143.86	161.98	161.83	5.28897	5.28897	2429	25	7.79523
162-982A-16H-2-A 117	143.87	161.99	161.84	5.2892	5.2892	2493	12	7.82124
162-982A-16H-2-A 121	143.91	162.03	161.88	5.2901	5.2901	2153	54	7.67462
162-982A-16H-2-A 122	143.92	162.04	161.89	5.29032	5.29032	2204	114	7.69803
162-982A-16H-2-A 124	143.94	162.06	161.91	5.29077	5.29077	2201	47	7.69667
162-982A-16H-2-A 126	143.96	162.08	161.93	5.29123	5.29123	2281	72	7.73237
162-982A-16H-2-A 127	143.97	162.09	161.94	5.29145	5.29145	2119	41	7.6587
162-982A-16H-2-A 130	144	162.12	161.97	5.29213	5.29213	2263	57	7.72445
162-982A-16H-2-A 132	144.02	162.14	161.99	5.29258	5.29258	2129	28	7.66341
162-982A-16H-2-A 134	144.04	162.16	162.01	5.29303	5.29303	2097	65	7.64826
162-982A-16H-2-A 135	144.05	162.17	162.02	5.29326	5.29326	2070	51	7.6353
162-982A-16H-2-A 138	144.08	162.2	162.05	5.29393	5.29393	2174	44	7.68432
162-982A-16H-2-A 141	144.11	162.23	162.08	5.29461	5.29461	2237	32	7.71289
162-982A-16H-2-A 142	144.12	162.24	162.09	5.29483	5.29483	2282	12	7.73281
162-982A-16H-2-A 145	144.15	162.27	162.12	5.29551	5.29551	2044	42	7.62266
162-982A-16H-2-A 146	144.16	162.28	162.13	5.29574	5.29574	2265	72	7.72533
162-982A-16H-2-A 148	144.18	162.3	162.15	5.29619	5.29619	2461	69	7.80832
162-982A-16H-2-A 149	144.19	162.31	162.16	5.29641	5.29641	2140	10	7.66856
162-982A-16H-3-A 2	144.22	162.34	162.19	5.29709	5.29709	2466	50	7.81035
162-982A-16H-3-A 4	144.24	162.36	162.21	5.29754	5.29754	2379	41	7.77444
162-982A-16H-3-A 7	144.27	162.39	162.24	5.29822	5.29822	2365	72	7.76853
162-982A-16H-3-A 8	144.28	162.4	162.25	5.29844	5.29844	2313	75	7.7463
162-982A-16H-3-A 9	144.29	162.41	162.26	5.29867	5.29867	2302	83	7.74153
162-982A-16H-3-A 12	144.32	162.44	162.29	5.29935	5.29935	2200	74	7.69621
162-982A-16H-3-A 14	144.34	162.46	162.31	5.2998	5.2998	2060	36	7.63046
162-982A-16H-3-A 15	144.35	162.47	162.32	5.30002	5.30002	1961	72	7.58121
162-982A-16H-3-A 18	144.38	162.5	162.35	5.3007	5.3007	1917	56	7.55852
162-982A-16H-3-A 19	144.39	162.51	162.36	5.30092	5.30092	2013	72	7.60738
162-982A-16H-3-A 22	144.42	162.54	162.39	5.3016	5.3016	2039	53	7.62021
162-982A-16H-3-A 23	144.43	162.55	162.4	5.30183	5.30183	2019	72	7.61036
162-982A-16H-3-A 26	144.46	162.58	162.43	5.3025	5.3025	2372	89	7.77149
162-982A-16H-3-A 28	144.48	162.6	162.45	5.30295	5.30295	2478	46	7.81521
162-982A-16H-3-A 31	144.51	162.63	162.48	5.30363	5.30363	2090	52	7.64492
162-982A-16H-3-A 32	144.52	162.64	162.49	5.30386	5.30386	2241	76	7.71468
162-982A-16H-3-A 33	144.53	162.65	162.5	5.30408	5.30408	2171	87	7.68294
162-982A-16H-3-A 36	144.56	162.68	162.53	5.30476	5.30476	2490	14	7.82004
162-982A-16H-3-A 38	144.58	162.7	162.55	5.30521	5.30521	2381	92	7.77528
162-982A-16H-3-A 41	144.61	162.73	162.58	5.30589	5.30589	2329	46	7.75319
162-982A-16H-3-A 42	144.62	162.74	162.59	5.30611	5.30611	2434	29	7.79729
162-982A-16H-3-A 43	144.63	162.75	162.6	5.30634	5.30634	2489	52	7.81964
162-982A-16H-3-A 44	144.64	162.76	162.61	5.30656	5.30656	2584	78	7.85709
162-982A-16H-3-A 46	144.66	162.78	162.63	5.30702	5.30702	2274	59	7.7293
162-982A-16H-3-A 49	144.69	162.81	162.66	5.30769	5.30769	2446	78	7.80221
162-982A-16H-3-A 50	144.7	162.82	162.67	5.30792	5.30792	2409	68	7.78697
162-982A-16H-3-A 52	144.72	162.84	162.69	5.30837	5.30837	2257	47	7.72179
162-982A-16H-3-A 53	144.73	162.85	162.7	5.30859	5.30859	2217	74	7.70391
162-982A-16H-3-A 56	144.76	162.88	162.73	5.30927	5.30927	2158	61	7.67694
162-982A-16H-3-A 58	144.78	162.9	162.75	5.30972	5.30972	2037	58	7.61923
162-982A-16H-3-A 60	144.8	162.92	162.77	5.31017	5.31017	2046	55	7.62364
162-982A-16H-3-A 63	144.83	162.95	162.8	5.31085	5.31085	2011	83	7.60639
162-982A-16H-3-A 64	144.84	162.96	162.81	5.31108	5.31108	1969	50	7.58528
162-982A-16H-3-A 66	144.86	162.98	162.83	5.31153	5.31153	1970	19	7.58579
162-982A-16H-3-A 67	144.87	162.99	162.84	5.31175	5.31175	2152	76	7.67415
162-982A-16H-3-A 70	144.9	163.02	162.87	5.31243	5.31243	2039	73	7.62021
162-982A-16H-3-A 71	144.91	163.03	162.88	5.31265	5.31265	1983	57	7.59237
162-982A-16H-3-A 74	144.94	163.06	162.91	5.31333	5.31333	2030	52	7.61579
162-982A-16H-3-A 75	144.95	163.07	162.92	5.31356	5.31356	1966	25	7.58376
162-982A-16H-3-A 78	144.98	163.1	162.95	5.31423	5.31423	1938	20	7.56941
162-982A-16H-3-A 79	144.99	163.11	162.96	5.31446	5.31446	2144	81	7.67043
162-982A-16H-3-A 82	145.02	163.14	162.99	5.31514	5.31514	2116	63	7.65728
162-982A-16H-3-A 85	145.05	163.17	163.02	5.31581	5.31581	1869	71	7.53316
162-982A-16H-3-A 86	145.06	163.18	163.03	5.31604	5.31604	2086	35	7.643
162-982A-16H-3-A 88	145.08	163.2	163.05	5.31649	5.31649	2144	48	7.67043
162-982A-16H-3-A 89	145.09	163.21	163.06	5.31671	5.31671	1989	35	7.59539
162-982A-16H-3-A 92	145.12	163.24	163.09	5.31739	5.31739	1967	55	7.58426
162-982A-16H-3-A 94	145.14	163.26	163.11	5.31784	5.31784	2049	45	7.62511
162-982A-16H-3-A 95	145.15	163.27	163.12	5.31807	5.31807	2233	50	7.7111
162-982A-16H-3-A 98	145.18	163.3	163.15	5.31874	5.31874	2203	52	7.69758
162-982A-16H-3-A 100	145.2	163.32	163.17	5.3192	5.3192	2258	61	7.72223
162-982A-16H-3-A 103	145.23	163.35	163.2	5.31987	5.31987	2285	81	7.73412
162-982A-16H-3-A 104	145.24	163.36	163.21	5.3201	5.3201	2078	55	7.63916
162-982A-16H-3-A 105	145.25	163.37	163.22	5.32032	5.32032	2254	58	7.72046
162-982A-16H-3-A 106	145.26	163.38	163.23	5.32055	5.32055	2377	37	7.77359
162-982A-16H-3-A 108	145.28	163.4	163.25	5.321	5.321	2622	71	7.87169
162-982A-16H-3-A 110	145.3	163.42	163.27	5.32151	5.32149	2342	56	7.75876
162-982A-16H-3-A 112	145.32	163.44	163.29	5.32202	5.32199	2475	37	7.814
162-982A-16H-3-A 114	145.34	163.46	163.31	5.32252	5.32248	2516	71	7.83043
162-982A-16H-3-A 115	145.35	163.47	163.32	5.32278	5.32273	2335	32	7.75577
162-982A-16H-3-A 117	145.37	163.49	163.34	5.32328	5.32322	2544	59	7.84149
162-982A-16H-3-A 120	145.4	163.52	163.37	5.32405	5.32396	2555	47	7.84581
162-982A-16H-3-A 123	145.43	163.55	163.4	5.32481	5.3247	2370	35	7.77065
162-982A-16H-3-A 124	145.44	163.56	163.41	5.32506	5.32494	2227	64	7.70841
162-982A-16H-3-A 126	145.46	163.58	163.43	5.32557	5.32544	2496	44	7.82244
162-982A-16H-3-A 128	145.48	163.6	163.45	5.32608	5.32593	2512	67	7.82883
162-982A-16H-3-A 129	145.49	163.61	163.46	5.32633	5.32618	2691	57	7.89767
162-982A-16H-3-A 132	145.52	163.64	163.49	5.32709	5.32692	2546	75	7.84228
162-982A-16H-3-A 135	145.55	163.67	163.52	5.32785	5.32766	2316	51	7.7476
162-982A-16H-3-A 136	145.56	163.68	163.53	5.32811	5.3279	2523	54	7.8332
162-982A-16H-3-A 137	145.57	163.69	163.54	5.32836	5.32815	2505	42	7.82604
162-982A-16H-3-A 140	145.6	163.72	163.57	5.32912	5.32889	2811	41	7.9413
162-982A-16H-3-A 141	145.61	163.73	163.58	5.32938	5.32914	2877	80	7.9645
162-982A-16H-3-A 144	145.64	163.76	163.61	5.33014	5.32988	2574	119	7.85322
162-982A-16H-3-A 146.5	145.67	163.79	163.64	5.3309	5.33062	2329	61	7.75319
162-982A-16H-3-A 148	145.68	163.8	163.65	5.33115	5.33086	2321	55	7.74975
162-982A-16H-4-A 2	145.72	163.84	163.69	5.33217	5.33185	2674	70	7.89133
162-982A-16H-4-A 4	145.74	163.86	163.71	5.33268	5.33234	2842	8	7.95226
162-982A-16H-4-A 6	145.76	163.88	163.73	5.33318	5.33283	3460	73	8.14902
162-982A-16H-4-A 8	145.78	163.9	163.75	5.33369	5.33333	4269	33	8.35913
162-982A-16H-4-A 10	145.8	163.92	163.77	5.3342	5.33382	3775	73	8.23616
162-982A-16H-4-A 11	145.81	163.93	163.78	5.33445	5.33407	3920	61	8.27385
162-982A-16H-4-A 12	145.82	163.94	163.79	5.33471	5.33431	3622	30	8.19478
162-982A-16H-4-A 14	145.84	163.96	163.81	5.33521	5.33481	4428	76	8.3957
162-982A-16H-4-A 17	145.87	163.99	163.84	5.33598	5.33555	4680	94	8.45105
162-982A-16H-4-A 18	145.88	164	163.85	5.33623	5.33579	4059	92	8.30869
162-982A-16H-4-A 19	145.89	164.01	163.86	5.33648	5.33604	3982	47	8.28954
162-982A-16H-4-A 22	145.92	164.04	163.89	5.33724	5.33678	3657	37	8.2044
162-982A-16H-4-A 24	145.94	164.06	163.91	5.33775	5.33727	3845	55	8.25453
162-982A-16H-4-A 27	145.97	164.09	163.94	5.33851	5.33801	4506	50	8.41317
162-982A-16H-4-A 28	145.98	164.1	163.95	5.33877	5.33826	3583	72	8.18396
162-982A-16H-4-A 29	145.99	164.11	163.96	5.33902	5.3385	3611	28	8.19174
162-982A-16H-4-A 32	146.02	164.14	163.99	5.33978	5.33924	3503	72	8.16138
162-982A-16H-4-A 34	146.04	164.16	164.01	5.34029	5.33974	3357	63	8.1188
162-982A-16H-4-A 37.5	146.08	164.2	164.05	5.34131	5.34072	3010	75	8.0097
162-982A-16H-4-A 39	146.09	164.21	164.06	5.34156	5.34097	2847	36	7.95402
162-982A-16H-4-A 40	146.1	164.22	164.07	5.34181	5.34122	3109	53	8.04206
162-982A-16H-4-A 41	146.11	164.23	164.08	5.34207	5.34146	3487	69	8.1568
162-982A-16H-4-A 42	146.12	164.24	164.09	5.34232	5.34171	3468	73	8.15133
162-982A-16H-4-A 43	146.13	164.25	164.1	5.34257	5.34196	2969	26	7.99598
162-982A-16H-4-A 46	146.16	164.28	164.13	5.34334	5.3427	3041	37	8.01994
162-982A-16H-4-A 48	146.18	164.3	164.15	5.34384	5.34319	2824	22	7.94591
162-982A-16H-4-A 50	146.2	164.32	164.17	5.34435	5.34368	2987	53	8.00202
162-982A-16H-4-A 53	146.23	164.35	164.2	5.34511	5.34442	2760	55	7.92299
162-982A-16H-4-A 54	146.24	164.36	164.21	5.34537	5.34467	2605	32	7.86519
162-982A-16H-4-A 56	146.26	164.38	164.23	5.34587	5.34516	2739	41	7.91535
162-982A-16H-4-A 59	146.29	164.41	164.26	5.34664	5.3459	2710	52	7.9047
162-982A-16H-4-A 60	146.3	164.42	164.27	5.34689	5.34615	2431	55	7.79606
162-982A-16H-4-A 63	146.33	164.45	164.3	5.34765	5.34689	2546	55	7.84228
162-982A-16H-4-A 65.5	146.36	164.48	164.33	5.34841	5.34763	2357	41	7.76514
162-982A-16H-4-A 67	146.37	164.49	164.34	5.34867	5.34787	2519	41	7.83162
162-982A-16H-4-A 68	146.38	164.5	164.35	5.34892	5.34812	2543	32	7.8411
162-982A-16H-4-A 71	146.41	164.53	164.38	5.34968	5.34886	2528	44	7.83518
162-982A-16H-4-A 72	146.42	164.54	164.39	5.34994	5.34911	2684	61	7.89506
162-982A-16H-4-A 75	146.45	164.57	164.42	5.3507	5.34985	2633	52	7.87588
162-982A-16H-4-A 76	146.46	164.58	164.43	5.35095	5.35009	2808	38	7.94023
162-982A-16H-4-A 78	146.48	164.6	164.45	5.35146	5.35059	2907	46	7.97488
162-982A-16H-4-A 80	146.5	164.62	164.47	5.35197	5.35108	2956	20	7.99159
162-982A-16H-4-A 82	146.52	164.64	164.49	5.35247	5.35157	2963	66	7.99396
162-982A-16H-4-A 83	146.53	164.65	164.5	5.35273	5.35182	2781	50	7.93057
162-982A-16H-4-A 84	146.54	164.66	164.51	5.35298	5.35207	2665	41	7.88796
162-982A-16H-4-A 86	146.56	164.68	164.53	5.35349	5.35256	2755	100	7.92117
162-982A-16H-4-A 87	146.57	164.69	164.54	5.35374	5.3528	2609	44	7.86672
162-982A-16H-4-A 91	146.61	164.73	164.58	5.35476	5.35379	2307	56	7.7437
162-982A-16H-4-A 92	146.62	164.74	164.59	5.35501	5.35404	1900	78	7.54961
162-982A-16H-4-A 94	146.64	164.76	164.61	5.35552	5.35453	2212	41	7.70165
162-982A-16H-4-A 96	146.66	164.78	164.63	5.35603	5.35502	2255	49	7.72091
162-982A-16H-4-A 98	146.68	164.8	164.65	5.35653	5.35552	2103	56	7.65112
162-982A-16H-4-A 99	146.69	164.81	164.66	5.35679	5.35576	2101	36	7.65017
162-982A-16H-4-A 100	146.7	164.82	164.67	5.35704	5.35601	2497	54	7.82285
162-982A-16H-4-A 102	146.72	164.84	164.69	5.35755	5.3565	2226	47	7.70796
162-982A-16H-4-A 104	146.74	164.86	164.71	5.35806	5.357	2482	53	7.81682
162-982A-16H-4-A 106	146.76	164.88	164.73	5.35856	5.35749	2008	72	7.60489
162-982A-16H-4-A 108	146.78	164.9	164.75	5.35907	5.35798	2296	34	7.73892
162-982A-16H-4-A 109	146.79	164.91	164.76	5.35933	5.35823	2402	31	7.78406
162-982A-16H-4-A 112	146.82	164.94	164.79	5.36009	5.35897	1847	66	7.52132
162-982A-16H-4-A 115	146.85	164.97	164.82	5.36085	5.35971	2211	41	7.7012
162-982A-16H-4-A 116	146.86	164.98	164.83	5.3611	5.35995	2379	84	7.77444
162-982A-16H-4-A 118	146.88	165	164.85	5.36161	5.36045	2445	47	7.8018
162-982A-16H-4-A 119	146.89	165.01	164.86	5.36186	5.36069	2139	86	7.66809
162-982A-16H-4-A 123	146.93	165.05	164.9	5.36288	5.36168	1978	75	7.58984
162-982A-16H-4-A 124	146.94	165.06	164.91	5.36313	5.36193	2070	42	7.6353
162-982A-16H-4-A 126	146.96	165.08	164.93	5.36364	5.36242	2213	74	7.7021
162-982A-16H-4-A 128	146.98	165.1	164.95	5.36415	5.36291	2461	74	7.80832
162-982A-16H-4-A 130	147	165.12	164.97	5.36466	5.36341	2484	68	7.81763
162-982A-16H-4-A 131	147.01	165.13	164.98	5.36491	5.36365	2338	13	7.75705
162-982A-16H-4-A 133.5	147.04	165.16	165.01	5.36567	5.36439	2188	65	7.69074
162-982A-16H-4-A 134	147.04	165.16	165.01	5.36567	5.36439	2134	76	7.66575
162-982A-16H-4-A 135.5	147.06	165.18	165.03	5.36618	5.36489	2351	35	7.7626
162-982A-16H-4-A 139	147.09	165.21	165.06	5.36694	5.36563	2320	56	7.74932
162-982A-16H-4-A 140	147.1	165.22	165.07	5.36719	5.36587	2221	41	7.70571
162-982A-16H-4-A 142	147.12	165.24	165.09	5.3677	5.36636	2190	50	7.69166
162-982A-16H-4-A 144	147.14	165.26	165.11	5.36821	5.36686	2115	42	7.65681
162-982A-16H-4-A 148	147.18	165.3	165.15	5.36923	5.36784	2203	40	7.69758
162-982A-16H-5-A 2	147.22	165.34	165.19	5.37024	5.36883	2389	56	7.77863
162-982A-16H-5-A 4	147.24	165.36	165.21	5.37075	5.36932	2587	19	7.85825
162-982A-16H-5-A 7	147.27	165.39	165.24	5.37151	5.37006	2668	55	7.88908
162-982A-16H-5-A 8	147.28	165.4	165.25	5.37176	5.37031	2754	62	7.92081
162-982A-16H-5-A 9	147.29	165.41	165.26	5.37202	5.37056	2395	24	7.78114
162-982A-16H-5-A 13.5	147.34	165.46	165.31	5.37329	5.37179	2574	81	7.85322
162-982A-16H-5-A 15	147.35	165.47	165.32	5.37354	5.37204	2406	71	7.78572
162-982A-16H-5-A 16	147.36	165.48	165.33	5.37379	5.37228	2277	22	7.73061
162-982A-16H-5-A 17	147.37	165.49	165.34	5.37405	5.37253	2462	44	7.80873
162-982A-16H-5-A 20	147.4	165.52	165.37	5.37481	5.37327	2647	47	7.88118
162-982A-16H-5-A 22	147.42	165.54	165.39	5.37532	5.37376	2494	73	7.82164
162-982A-16H-5-A 24	147.44	165.56	165.41	5.37582	5.37425	2276	17	7.73017
162-982A-16H-5-A 27	147.47	165.59	165.44	5.37659	5.37499	2730	50	7.91206
162-982A-16H-5-A 30	147.5	165.62	165.47	5.37735	5.37573	2159	18	7.6774
162-982A-16H-5-A 32	147.52	165.64	165.49	5.37785	5.37623	2382	96	7.7757
162-982A-16H-5-A 33	147.53	165.65	165.5	5.37811	5.37647	2293	10	7.73762
162-982A-16H-5-A 36	147.56	165.68	165.53	5.37887	5.37721	2141	84	7.66903
162-982A-16H-5-A 37	147.57	165.69	165.54	5.37912	5.37746	2209	92	7.7003
162-982A-16H-5-A 39	147.59	165.71	165.56	5.37963	5.37795	2478	48	7.81521
162-982A-16H-5-A 40	147.6	165.72	165.57	5.37989	5.3782	2539	55	7.83953
162-982A-16H-5-A 43	147.63	165.75	165.6	5.38065	5.37894	2045	65	7.62315
162-982A-16H-5-A 44	147.64	165.76	165.61	5.3809	5.37919	2188	47	7.69074
162-982A-16H-5-A 46	147.66	165.78	165.63	5.38141	5.37968	2458	49	7.8071
162-982A-16H-5-A 48.5	147.69	165.81	165.66	5.38217	5.38042	1915	62	7.55747
162-982A-16H-5-A 51	147.71	165.83	165.68	5.38268	5.38091	1966	69	7.58376
162-982A-16H-5-A 52	147.72	165.84	165.69	5.38293	5.38116	2300	94	7.74066
162-982A-16H-5-A 53	147.73	165.85	165.7	5.38319	5.3814	1939	80	7.56993
162-982A-16H-5-A 54	147.74	165.86	165.71	5.38344	5.38165	2141	41	7.66903
162-982A-16H-5-A 56	147.76	165.88	165.73	5.38395	5.38214	1982	53	7.59186
162-982A-16H-5-A 57	147.77	165.89	165.74	5.3842	5.38239	2175	34	7.68478
162-982A-16H-5-A 59.5	147.8	165.92	165.77	5.38496	5.38313	2301	78	7.7411
162-982A-16H-5-A 62	147.82	165.94	165.79	5.38547	5.38362	2213	55	7.7021
162-982A-16H-5-A 64	147.84	165.96	165.81	5.38598	5.38412	2329	46	7.75319
162-982A-16H-5-A 66	147.86	165.98	165.83	5.38648	5.38461	2814	38	7.94236
162-982A-16H-5-A 68	147.88	166	165.85	5.38699	5.3851	2681	22	7.89395
162-982A-16H-5-A 70	147.9	166.02	165.87	5.3875	5.3856	2510	84	7.82804
162-982A-16H-5-A 71	147.91	166.03	165.88	5.38775	5.38584	2484	27	7.81763
162-982A-16H-5-A 74	147.94	166.06	165.91	5.38852	5.38658	2419	41	7.79111
162-982A-16H-5-A 75	147.95	166.07	165.92	5.38877	5.38683	2274	64	7.7293
162-982A-16H-5-A 77.5	147.98	166.1	165.95	5.38953	5.38757	2389	78	7.77863
162-982A-16H-5-A 80	148	166.12	165.97	5.39004	5.38806	2757	95	7.9219
162-982A-16H-5-A 81	148.01	166.13	165.98	5.39029	5.38831	2544	52	7.84149
162-982A-16H-5-A 86	148.06	166.18	166.03	5.39156	5.38954	2438	20	7.79893
162-982A-16H-5-A 88	148.08	166.2	166.05	5.39207	5.39003	2769	58	7.92624
162-982A-16H-5-A 89	148.09	166.21	166.06	5.39232	5.39028	2671	59	7.89021
162-982A-16H-5-A 92	148.12	166.24	166.09	5.39308	5.39102	2903	66	7.9735
162-982A-16H-5-A 94	148.14	166.26	166.11	5.39359	5.39151	2639	88	7.87816
162-982A-16H-5-A 95	148.15	166.27	166.12	5.39385	5.39176	2358	64	7.76557
162-982A-16H-5-A 98	148.18	166.3	166.15	5.39461	5.3925	2585	78	7.85748
162-982A-16H-5-A 100	148.2	166.32	166.17	5.39511	5.39299	2686	77	7.89581
162-982A-16H-5-A 102	148.22	166.34	166.19	5.39562	5.39349	3235	68	8.08178
162-982A-16H-5-A 105	148.25	166.37	166.22	5.39638	5.39422	3082	86	8.03333
162-982A-16H-5-A 106	148.26	166.38	166.23	5.39664	5.39447	3135	81	8.05038
162-982A-16H-5-A 108	148.28	166.4	166.25	5.39715	5.39496	3173	42	8.06243
162-982A-16H-5-A 110	148.3	166.42	166.27	5.39765	5.39546	3081	54	8.03301
162-982A-16H-5-A 111	148.31	166.43	166.28	5.39791	5.3957	3358	75	8.1191
162-982A-16H-5-A 114	148.34	166.46	166.31	5.39867	5.39644	4171	108	8.33591
162-982A-16H-5-A 116	148.36	166.48	166.33	5.39918	5.39694	4650	94	8.44462
162-982A-16H-5-A 118	148.38	166.5	166.35	5.39968	5.39743	4212	100	8.34569
162-982A-16H-5-A 119	148.39	166.51	166.36	5.39994	5.39768	5379	114	8.59026
162-982A-16H-5-A 122	148.42	166.54	166.39	5.4007	5.39842	4906	119	8.49821
162-982A-16H-5-A 123	148.43	166.55	166.4	5.40095	5.39866	6766	208	8.81967
162-982A-16H-5-A 126	148.46	166.58	166.43	5.40171	5.3994	6613	206	8.79679
162-982A-16H-5-A 129	148.49	166.61	166.46	5.40248	5.40014	7323	181	8.89878
162-982A-16H-5-A 130	148.5	166.62	166.47	5.40273	5.40039	7965	178	8.98281
162-982A-16H-5-A 132	148.52	166.64	166.49	5.40324	5.40088	6141	132	8.72274
162-982A-16H-5-A 134.5	148.55	166.67	166.52	5.404	5.40162	7083	144	8.86545
162-982A-16H-5-A 137	148.57	166.69	166.54	5.40451	5.40211	8002	194	8.98745
162-982A-16H-5-A 138	148.58	166.7	166.55	5.40476	5.40236	7500	170	8.92266
162-982A-16H-5-A 140	148.6	166.72	166.57	5.40527	5.40285	4171	170	8.33591
162-982A-16H-5-A 142	148.62	166.74	166.59	5.40577	5.40335	4171	94	8.33591
162-982A-16H-5-A 145	148.65	166.77	166.62	5.40654	5.40409	4171	94	8.33591
162-982A-16H-5-A 146	148.66	166.78	166.63	5.40679	5.40433	4171	94	8.33591
162-982A-16H-5-A 148	148.68	166.8	166.65	5.4073	5.40483	4171	94	8.33591
162-982A-16H-6-A 2	148.72	166.84	166.69	5.40831	5.40581	4171	94	8.33591
162-982A-16H-6-A 4	148.74	166.86	166.71	5.40882	5.40631	4171	94	8.33591
162-982A-16H-6-A 7	148.77	166.89	166.74	5.40958	5.40705	4171	97	8.33591
162-982A-16H-6-A 8	148.78	166.9	166.75	5.40984	5.40729	4171	97	8.33591
162-982A-16H-6-A 11	148.81	166.93	166.78	5.4106	5.40803	4171	97	8.33591
162-982A-16H-6-A 13	148.83	166.95	166.8	5.4111	5.40852	5441	66	8.60172
162-982A-16H-6-A 14	148.84	166.96	166.81	5.41136	5.40877	4171	97	8.33591
162-982A-16H-6-A 16.5	148.87	166.99	166.84	5.41212	5.40951	4171	97	8.33591
162-982A-16H-6-A 19	148.89	167.01	166.86	5.41263	5.41	3220	60	8.07714
162-982A-16H-6-A 20	148.9	167.02	166.87	5.41288	5.41025	2696	64	7.89952
162-982A-16H-6-A 22	148.92	167.04	166.89	5.41339	5.41074	3044	94	8.02093
162-982A-16H-6-A 24.5	148.95	167.07	166.92	5.41415	5.41148	3363	30	8.12059
162-982A-16H-6-A 27	148.97	167.09	166.94	5.41466	5.41198	2836	97	7.95015
162-982A-16H-6-A 28	148.98	167.1	166.95	5.41491	5.41222	3020	31	8.01301
162-982A-16H-6-A 29	148.99	167.11	166.96	5.41517	5.41247	2893	44	7.97005
162-982A-16H-6-A 32	149.02	167.14	166.99	5.41593	5.41321	2270	37	7.72754
162-982A-16H-6-A 35	149.05	167.17	167.02	5.41669	5.41395	2568	38	7.85088
162-982A-16H-6-A 36	149.06	167.18	167.03	5.41694	5.4142	2097	59	7.64826
162-982A-16H-6-A 37	149.07	167.19	167.04	5.4172	5.41444	2295	60	7.73849
162-982A-16H-6-A 40	149.1	167.22	167.07	5.41796	5.41518	2268	82	7.72665
162-982A-16H-6-A 42	149.12	167.24	167.09	5.41847	5.41567	2565	59	7.84971
162-982A-16H-6-A 46	149.16	167.28	167.13	5.41948	5.41666	2620	52	7.87093
162-982A-16H-6-A 47	149.17	167.29	167.14	5.41973	5.41691	2680	43	7.89357
162-982A-16H-6-A 49	149.19	167.31	167.16	5.42024	5.4174	3297	78	8.10077
162-982A-16H-6-A 52	149.22	167.34	167.19	5.421	5.41814	3496	31	8.15937
162-982A-16H-6-A 53	149.23	167.35	167.2	5.42126	5.41839	3098	19	8.03851
162-982A-16H-6-A 57	149.27	167.39	167.24	5.42227	5.41937	3194	61	8.06903
162-982A-16H-6-A 58	149.28	167.4	167.25	5.42253	5.41962	3399	102	8.13124
162-982A-16H-6-A 61	149.31	167.43	167.28	5.42329	5.42036	3460	50	8.14902
162-982A-16H-6-A 62	149.32	167.44	167.29	5.42354	5.42061	3436	46	8.14206
162-982A-16H-6-A 65	149.35	167.47	167.32	5.4243	5.42135	3135	62	8.05038
162-982A-16H-6-A 66	149.36	167.48	167.33	5.42456	5.42159	3101	49	8.03948
162-982A-16H-6-A 68	149.38	167.5	167.35	5.42506	5.42208	2798	73	7.93666
162-982A-16H-6-A 69	149.39	167.51	167.36	5.42532	5.42233	2705	79	7.90286
162-982A-16H-6-A 72	149.42	167.54	167.39	5.42608	5.42307	2837	50	7.9505
162-982A-16H-6-A 74	149.44	167.56	167.41	5.42659	5.42356	2786	-2	7.93236
162-982A-16H-6-A 76	149.46	167.58	167.43	5.4271	5.42406	2826	54	7.94662
162-982A-16H-6-A 79	149.49	167.61	167.46	5.42786	5.4248	2567	75	7.85049
162-982A-16H-6-A 80	149.5	167.62	167.47	5.42811	5.42504	2604	67	7.8648
162-982A-16H-6-A 83	149.53	167.65	167.5	5.42887	5.42578	2937	51	7.98514
162-982A-16H-6-A 84	149.54	167.66	167.51	5.42913	5.42603	2588	73	7.85864
162-982A-16H-6-A 86	149.56	167.68	167.53	5.42963	5.42652	2731	55	7.91242
162-982A-16H-6-A 88	149.58	167.7	167.55	5.43014	5.42702	2776	42	7.92877
162-982A-16H-6-A 91	149.61	167.73	167.58	5.4309	5.42776	2573	80	7.85283
162-982A-16H-6-A 92	149.62	167.74	167.59	5.43116	5.428	2619	47	7.87055
162-982A-16H-6-A 94	149.64	167.76	167.61	5.43166	5.4285	2731	64	7.91242
162-982A-16H-6-A 95	149.65	167.77	167.62	5.43192	5.42874	2418	63	7.7907
162-982A-16H-6-A 98	149.68	167.8	167.65	5.43268	5.42948	2407	55	7.78614
162-982A-16H-6-A 100	149.7	167.82	167.67	5.43319	5.42997	2619	64	7.87055
162-982A-16H-6-A 101	149.71	167.83	167.68	5.43344	5.43022	2472	30	7.81278
162-982A-16H-6-A 102	149.72	167.84	167.69	5.43369	5.43047	2514	55	7.82963
162-982A-16H-6-A 104	149.74	167.86	167.71	5.4342	5.43096	2611	66	7.86749
162-982A-16H-6-A 106	149.76	167.88	167.73	5.43471	5.43145	2848	59	7.95437
162-982A-16H-6-A 108	149.78	167.9	167.75	5.43522	5.43195	2955	41	7.99125
162-982A-16H-6-A 109	149.79	167.91	167.76	5.43547	5.43219	3047	70	8.02191
162-982A-16H-6-A 112	149.82	167.94	167.79	5.43623	5.43293	2868	84	7.96137
162-982A-16H-6-A 114	149.84	167.96	167.81	5.43674	5.43343	3004	69	8.0077
162-982A-16H-6-A 117	149.87	167.99	167.84	5.4375	5.43417	3123	38	8.04655
162-982A-16H-6-A 118	149.88	168	167.85	5.43776	5.43441	3334	64	8.11193
162-982A-16H-6-A 120	149.9	168.02	167.87	5.43826	5.43491	3170	25	8.06149
162-982A-16H-6-A 121	149.91	168.03	167.88	5.43852	5.43515	3195	60	8.06934
162-982A-16H-6-A 124	149.94	168.06	167.91	5.43928	5.43589	3204	80	8.07216
162-982A-16H-6-A 126	149.96	168.08	167.93	5.43979	5.43638	3391	57	8.12888
162-982A-16H-6-A 127	149.97	168.09	167.94	5.44004	5.43663	3077	54	8.03171
162-982A-16H-6-A 130	150	168.12	167.97	5.4408	5.43737	2769	46	7.92624
162-982A-16H-6-A 131	150.01	168.13	167.98	5.44106	5.43762	3049	20	8.02257
162-982A-16H-6-A 134	150.04	168.16	168.01	5.44182	5.43836	2888	24	7.96832
162-982A-16H-6-A 137	150.07	168.19	168.04	5.44258	5.4391	2573	33	7.85283
162-982A-16H-6-A 138	150.08	168.2	168.05	5.44283	5.43934	2492	84	7.82084
162-982A-16H-6-A 139	150.09	168.21	168.06	5.44309	5.43959	2372	46	7.77149
162-982A-16H-6-A 142	150.12	168.24	168.09	5.44385	5.44033	2252	86	7.71957
162-982A-16H-6-A 144	150.14	168.26	168.11	5.44435	5.44082	2237	47	7.71289
162-982A-16H-6-A 147	150.17	168.29	168.14	5.44512	5.44156	1992	28	7.59689
162-982A-16H-6-A 148	150.18	168.3	168.15	5.44537	5.44181	2226	23	7.70796
162-982A-16H-6-A 149	150.19	168.31	168.16	5.44562	5.44206	2036	50	7.61874
162-982A-17H-1-A 40	151.1	170.1	169.95	5.49106	5.48089	1839	36	7.51698
162-982A-17H-1-A 41	151.11	170.11	169.96	5.49131	5.48111	1848	23	7.52186
162-982A-17H-1-A 42	151.12	170.12	169.97	5.49156	5.48132	1701	19	7.43897
162-982A-17H-1-A 44	151.14	170.14	169.99	5.49207	5.48175	1606	69	7.3815
162-982A-17H-1-A 45	151.15	170.15	170	5.49233	5.48196	1426	46	7.26263
162-982A-17H-1-A 48	151.18	170.18	170.03	5.49309	5.48261	1682	24	7.42774
162-982A-17H-1-A 50	151.2	170.2	170.05	5.4936	5.48304	1656	38	7.41216
162-982A-17H-1-A 51	151.21	170.21	170.06	5.49385	5.48325	1638	79	7.40123
162-982A-17H-1-A 54	151.24	170.24	170.09	5.49461	5.48389	1604	64	7.38026
162-982A-17H-1-A 56	151.26	170.26	170.11	5.49512	5.48432	1807	66	7.49942
162-982A-17H-1-A 58	151.28	170.28	170.13	5.49563	5.48475	1625	66	7.39326
162-982A-17H-1-A 59	151.29	170.29	170.14	5.49588	5.48496	1857	33	7.52672
162-982A-17H-1-A 62	151.32	170.32	170.17	5.49664	5.4856	1753	56	7.46908
162-982A-17H-1-A 64	151.34	170.34	170.19	5.49715	5.48603	1823	38	7.50824
162-982A-17H-1-A 65	151.35	170.35	170.2	5.4974	5.48625	2236	54	7.71244
162-982A-17H-1-A 68	151.38	170.38	170.23	5.49816	5.48689	1715	69	7.44717
162-982A-17H-1-A 70	151.4	170.4	170.25	5.49867	5.48732	1666	20	7.41818
162-982A-17H-1-A 73	151.43	170.43	170.28	5.49943	5.48796	1512	56	7.32119
162-982A-17H-1-A 74	151.44	170.44	170.29	5.49969	5.48817	1766	52	7.47647
162-982A-17H-1-A 76	151.46	170.46	170.31	5.50019	5.4886	1598	44	7.37651
162-982A-17H-1-A 79	151.49	170.49	170.34	5.50096	5.48924	1507	13	7.31788
162-982A-17H-1-A 80	151.5	170.5	170.35	5.50121	5.48946	1558	47	7.35116
162-982A-17H-1-A 82	151.52	170.52	170.37	5.50172	5.48989	1703	58	7.44015
162-982A-17H-1-A 85	151.55	170.55	170.4	5.50248	5.49053	1752	21	7.46851
162-982A-17H-1-A 86	151.56	170.56	170.41	5.50273	5.49074	1569	15	7.35819
162-982A-17H-1-A 88	151.58	170.58	170.43	5.50324	5.49117	1726	50	7.45356
162-982A-17H-1-A 89	151.59	170.59	170.44	5.50349	5.49138	1733	55	7.45761
162-982A-17H-1-A 94	151.64	170.64	170.49	5.50476	5.49245	1806	38	7.49887
162-982A-17H-1-A 96	151.66	170.66	170.51	5.50527	5.49288	1654	22	7.41095
162-982A-17H-1-A 98	151.68	170.68	170.53	5.50578	5.49331	1702	-6	7.43956
162-982A-17H-1-A 99	151.69	170.69	170.54	5.50603	5.49352	1894	73	7.54645
162-982A-17H-1-A 102	151.72	170.72	170.57	5.50679	5.49417	1705	35	7.44132
162-982A-17H-1-A 104	151.74	170.74	170.59	5.5073	5.4946	1616	51	7.38771
162-982A-17H-1-A 106	151.76	170.76	170.61	5.50781	5.49502	1670	51	7.42058
162-982A-17H-1-A 108	151.78	170.78	170.63	5.50832	5.49545	1821	50	7.50714
162-982A-17H-1-A 109	151.79	170.79	170.64	5.50857	5.49567	1722	44	7.45124
162-982A-17H-1-A 113	151.83	170.83	170.68	5.50959	5.49652	1773	64	7.48043
162-982A-17H-1-A 114	151.84	170.84	170.69	5.50984	5.49674	1951	63	7.5761
162-982A-17H-1-A 116	151.86	170.86	170.71	5.51035	5.49716	2413	76	7.78863
162-982A-17H-1-A 120	151.9	170.9	170.75	5.51136	5.49802	2198	40	7.6953
162-982A-17H-1-A 122	151.92	170.92	170.77	5.51187	5.49845	2039	30	7.62021
162-982A-17H-1-A 123	151.93	170.93	170.78	5.51212	5.49866	1943	13	7.57199
162-982A-17H-1-A 126	151.96	170.96	170.81	5.51289	5.4993	1957	17	7.57917
162-982A-17H-1-A 128	151.98	170.98	170.83	5.51339	5.49973	2390	78	7.77905
162-982A-17H-1-A 131	152.01	171.01	170.86	5.51415	5.50038	2479	50	7.81561
162-982A-17H-1-A 132	152.02	171.02	170.87	5.51441	5.50059	2461	40	7.80832
162-982A-17H-1-A 134	152.04	171.04	170.89	5.51492	5.50102	2618	64	7.87017
162-982A-17H-1-A 137	152.07	171.07	170.92	5.51568	5.50166	2445	27	7.8018
162-982A-17H-1-A 140	152.1	171.1	170.95	5.51644	5.5023	2245	67	7.71646
162-982A-17H-1-A 141	152.11	171.11	170.96	5.51669	5.50252	2650	52	7.88231
162-982A-17H-1-A 142	152.12	171.12	170.97	5.51695	5.50273	2546	38	7.84228
162-982A-17H-1-A 144	152.14	171.14	170.99	5.51745	5.50316	2496	45	7.82244
162-982A-17H-1-A 146	152.16	171.16	171.01	5.51796	5.50359	2858	54	7.95788
162-982A-17H-1-A 148	152.18	171.18	171.03	5.51847	5.50401	2916	13	7.97797
162-982A-17H-2-A 2	152.22	171.22	171.07	5.51948	5.50487	3185	43	8.06621
162-982A-17H-2-A 4	152.24	171.24	171.09	5.51999	5.5053	3397	47	8.13065
162-982A-17H-2-A 6	152.26	171.26	171.11	5.5205	5.50573	3356	66	8.11851
162-982A-17H-2-A 8	152.28	171.28	171.13	5.52101	5.50616	3977	109	8.28828
162-982A-17H-2-A 9	152.29	171.29	171.14	5.52126	5.50637	3761	61	8.23244
162-982A-17H-2-A 13.5	152.34	171.34	171.19	5.52253	5.50744	3389	76	8.12829
162-982A-17H-2-A 15	152.35	171.35	171.2	5.52278	5.50765	3591	60	8.18619
162-982A-17H-2-A 16	152.36	171.36	171.21	5.52304	5.50787	3438	40	8.14265
162-982A-17H-2-A 19	152.39	171.39	171.24	5.5238	5.50851	3482	55	8.15536
162-982A-17H-2-A 20	152.4	171.4	171.25	5.52405	5.50872	3701	89	8.21636
162-982A-17H-2-A 22	152.42	171.42	171.27	5.52456	5.50915	3444	19	8.14439
162-982A-17H-2-A 24	152.44	171.44	171.29	5.52507	5.50958	3309	47	8.1044
162-982A-17H-2-A 26	152.46	171.46	171.31	5.52558	5.51001	3272	-14	8.09316
162-982A-17H-2-A 29	152.49	171.49	171.34	5.52634	5.51065	3396	91	8.13035
162-982A-17H-2-A 30	152.5	171.5	171.35	5.52659	5.51087	3324	62	8.10892
162-982A-17H-2-A 31	152.51	171.51	171.36	5.52685	5.51108	3443	42	8.1441
162-982A-17H-2-A 34	152.54	171.54	171.39	5.52761	5.51172	3189	60	8.06746
162-982A-17H-2-A 36	152.56	171.56	171.41	5.52811	5.51215	3559	45	8.17723
162-982A-17H-2-A 38	152.58	171.58	171.43	5.52862	5.51258	3278	58	8.09499
162-982A-17H-2-A 40	152.6	171.6	171.45	5.52913	5.51301	3119	52	8.04527
162-982A-17H-2-A 41	152.61	171.61	171.46	5.52938	5.51322	3015	69	8.01136
162-982A-17H-2-A 44	152.64	171.64	171.49	5.53015	5.51386	3078	65	8.03204
162-982A-17H-2-A 45	152.65	171.65	171.5	5.5304	5.51408	2680	58	7.89357
162-982A-17H-2-A 48	152.68	171.68	171.53	5.53116	5.51472	3046	38	8.02158
162-982A-17H-2-A 50	152.7	171.7	171.55	5.53167	5.51515	2871	47	7.96242
162-982A-17H-2-A 52	152.72	171.72	171.57	5.53218	5.51557	2933	74	7.98378
162-982A-17H-2-A 55	152.75	171.75	171.6	5.53294	5.51622	2940	49	7.98616
162-982A-17H-2-A 56	152.76	171.76	171.61	5.53319	5.51643	2833	59	7.94909
162-982A-17H-2-A 58	152.78	171.78	171.63	5.5337	5.51686	2563	23	7.84893
162-982A-17H-2-A 60	152.8	171.8	171.65	5.53421	5.51729	2358	83	7.76557
162-982A-17H-2-A 63	152.83	171.83	171.68	5.53497	5.51793	2480	83	7.81601
162-982A-17H-2-A 64	152.84	171.84	171.69	5.53522	5.51814	2530	92	7.83597
162-982A-17H-2-A 66	152.86	171.86	171.71	5.53573	5.51857	2490	37	7.82004
162-982A-17H-2-A 69	152.89	171.89	171.74	5.53649	5.51934	2317	42	7.74803
162-982A-17H-2-A 71	152.91	171.91	171.76	5.537	5.52002	2504	27	7.82564
162-982A-17H-2-A 72	152.92	171.92	171.77	5.53725	5.52036	2335	67	7.75577
162-982A-17H-2-A 75	152.95	171.95	171.8	5.53801	5.52138	2071	46	7.63579
162-982A-17H-2-A 76	152.96	171.96	171.81	5.53827	5.52172	2267	50	7.72621
162-982A-17H-2-A 79	152.99	171.99	171.84	5.53903	5.52274	2069	61	7.63482
162-982A-17H-2-A 80	153	172	171.85	5.53928	5.52308	2027	76	7.61431
162-982A-17H-2-A 81.5	153.02	172.02	171.87	5.53979	5.52376	2290	55	7.73631
162-982A-17H-2-A 84	153.04	172.04	171.89	5.5403	5.52444	2546	70	7.84228
162-982A-17H-2-A 86	153.06	172.06	171.91	5.54081	5.52512	2503	52	7.82525
162-982A-17H-2-A 90	153.1	172.1	171.95	5.54182	5.52648	2614	8	7.86864
162-982A-17H-2-A 92	153.12	172.12	171.97	5.54233	5.52716	2643	58	7.87967
162-982A-17H-2-A 93	153.13	172.13	171.98	5.54258	5.5275	2746	47	7.9179
162-982A-17H-2-A 96	153.16	172.16	172.01	5.54334	5.52852	2733	52	7.91316
162-982A-17H-2-A 98	153.18	172.18	172.03	5.54385	5.5292	2925	33	7.98105
162-982A-17H-2-A 101	153.21	172.21	172.06	5.54461	5.53022	2874	69	7.96346
162-982A-17H-2-A 102	153.22	172.22	172.07	5.54487	5.53056	2689	82	7.89692
162-982A-17H-2-A 103	153.23	172.23	172.08	5.54512	5.5309	2378	82	7.77402
162-982A-17H-2-A 106	153.26	172.26	172.11	5.54588	5.53192	2579	46	7.85516
162-982A-17H-2-A 108	153.28	172.28	172.13	5.54639	5.5326	2464	27	7.80954
162-982A-17H-2-A 109	153.29	172.29	172.14	5.54664	5.53294	2137	30	7.66716
162-982A-17H-2-A 112	153.32	172.32	172.17	5.5474	5.53396	2526	86	7.83439
162-982A-17H-2-A 113	153.33	172.33	172.18	5.54766	5.5343	2456	19	7.80629
162-982A-17H-2-A 116	153.36	172.36	172.21	5.54842	5.53532	2561	58	7.84815
162-982A-17H-2-A 117	153.37	172.37	172.22	5.54867	5.53566	2495	80	7.82204
162-982A-17H-2-A 121	153.41	172.41	172.26	5.54969	5.53702	2383	25	7.77612
162-982A-17H-2-A 122	153.42	172.42	172.27	5.54994	5.53736	2502	69	7.82485
162-982A-17H-2-A 123	153.43	172.43	172.28	5.5502	5.5377	2694	55	7.89878
162-982A-17H-2-A 126	153.46	172.46	172.31	5.55096	5.53872	3012	94	8.01036
162-982A-17H-2-A 128	153.48	172.48	172.33	5.55147	5.5394	2399	77	7.78281
162-982A-17H-2-A 130	153.5	172.5	172.35	5.55197	5.54008	2819	40	7.94414
162-982A-17H-2-A 132	153.52	172.52	172.37	5.55248	5.54076	2877	35	7.9645
162-982A-17H-2-A 135	153.55	172.55	172.4	5.55324	5.54178	2867	73	7.96102
162-982A-17H-2-A 136	153.56	172.56	172.41	5.5535	5.54212	2667	65	7.88871
162-982A-17H-2-A 138	153.58	172.58	172.43	5.554	5.5428	2948	45	7.98888
162-982A-17H-2-A 140	153.6	172.6	172.45	5.55451	5.54348	3248	66	8.08579
162-982A-17H-2-A 143	153.63	172.63	172.48	5.55527	5.5445	2957	24	7.99193
162-982A-17H-2-A 144	153.64	172.64	172.49	5.55553	5.54484	2990	80	8.00303
162-982A-17H-2-A 146	153.66	172.66	172.51	5.55603	5.54552	2940	69	7.98616
162-982A-17H-2-A 148	153.68	172.68	172.53	5.55654	5.5462	3330	75	8.11073
162-982A-17H-3-A 2	153.72	172.72	172.57	5.55756	5.54756	4353	56	8.37862
162-982A-17H-3-A 4	153.74	172.74	172.59	5.55806	5.54824	4023	98	8.29978
162-982A-17H-3-A 6	153.76	172.76	172.61	5.55857	5.54892	4049	56	8.30623
162-982A-17H-3-A 8	153.78	172.78	172.63	5.55908	5.5496	5182	55	8.55295
162-982A-17H-3-A 10	153.8	172.8	172.65	5.55959	5.55028	5302	92	8.57584
162-982A-17H-3-A 13	153.83	172.83	172.68	5.56035	5.5513	5582	44	8.6273
162-982A-17H-3-A 14	153.84	172.84	172.69	5.5606	5.55164	5494	92	8.61141
162-982A-17H-3-A 16	153.86	172.86	172.71	5.56111	5.55232	5065	57	8.53011
162-982A-17H-3-A 19	153.89	172.89	172.74	5.56187	5.55334	4722	91	8.45999
162-982A-17H-3-A 20	153.9	172.9	172.75	5.56213	5.55368	4965	33	8.51017
162-982A-17H-3-A 23	153.93	172.93	172.78	5.56289	5.5547	5297	57	8.5749
162-982A-17H-3-A 24	153.94	172.94	172.79	5.56314	5.55504	4780	85	8.4722
162-982A-17H-3-A 26	153.96	172.96	172.81	5.56365	5.55572	4817	43	8.47991
162-982A-17H-3-A 29	153.99	172.99	172.84	5.56441	5.55674	3827	35	8.24984
162-982A-17H-3-A 30	154	173	172.85	5.56466	5.55708	3524	75	8.16735
162-982A-17H-3-A 32	154.02	173.02	172.87	5.56517	5.55776	2904	100	7.97384
162-982A-17H-3-A 35	154.05	173.05	172.9	5.56593	5.55878	3230	66	8.08024
162-982A-17H-3-A 36	154.06	173.06	172.91	5.56619	5.55912	2546	34	7.84228
162-982A-17H-3-A 38	154.08	173.08	172.93	5.56669	5.5598	2189	41	7.6912
162-982A-17H-3-A 40	154.1	173.1	172.95	5.5672	5.56048	2275	49	7.72974
162-982A-17H-3-A 43	154.13	173.13	172.98	5.56796	5.5615	2408	79	7.78655
162-982A-17H-3-A 44	154.14	173.14	172.99	5.56822	5.56184	2354	24	7.76387
162-982A-17H-3-A 46	154.16	173.16	173.01	5.56873	5.56252	2402	60	7.78406
162-982A-17H-3-A 48	154.18	173.18	173.03	5.56923	5.5632	2611	73	7.86749
162-982A-17H-3-A 49	154.19	173.19	173.04	5.56949	5.56354	2337	80	7.75662
162-982A-17H-3-A 52	154.22	173.22	173.07	5.57025	5.56456	2567	86	7.85049
162-982A-17H-3-A 54	154.24	173.24	173.09	5.57076	5.56524	2400	71	7.78322
162-982A-17H-3-A 57	154.27	173.27	173.12	5.57152	5.56626	2300	27	7.74066
162-982A-17H-3-A 58	154.28	173.28	173.13	5.57177	5.5666	2294	22	7.73805
162-982A-17H-3-A 61	154.31	173.31	173.16	5.57253	5.56762	2299	43	7.74023
162-982A-17H-3-A 62	154.32	173.32	173.17	5.57279	5.56796	2272	64	7.72842
162-982A-17H-3-A 65	154.35	173.35	173.2	5.57355	5.56898	2423	62	7.79276
162-982A-17H-3-A 66	154.36	173.36	173.21	5.5738	5.56932	2416	55	7.78987
162-982A-17H-3-A 68	154.38	173.38	173.23	5.57431	5.57	2455	73	7.80588
162-982A-17H-3-A 70	154.4	173.4	173.25	5.57482	5.57068	2890	41	7.96901
162-982A-17H-3-A 72	154.42	173.42	173.27	5.57532	5.57136	2355	39	7.7643
162-982A-17H-3-A 74	154.44	173.44	173.29	5.57583	5.57204	2429	43	7.79523
162-982A-17H-3-A 76	154.46	173.46	173.31	5.57634	5.57272	2210	27	7.70075
162-982A-17H-3-A 78	154.48	173.48	173.33	5.57685	5.5734	2607	58	7.86596
162-982A-17H-3-A 81	154.51	173.51	173.36	5.57761	5.57442	2591	29	7.8598
162-982A-17H-3-A 82	154.52	173.52	173.37	5.57786	5.57476	2338	5	7.75705
162-982A-17H-3-A 84	154.54	173.54	173.39	5.57837	5.57544	2380	38	7.77486
162-982A-17H-3-A 86	154.56	173.56	173.41	5.57888	5.57612	2539	65	7.83953
162-982A-17H-3-A 89	154.59	173.59	173.44	5.57964	5.57714	3039	44	8.01928
162-982A-17H-3-A 90	154.6	173.6	173.45	5.57989	5.57748	3081	70	8.03301
162-982A-17H-3-A 92	154.62	173.62	173.47	5.5804	5.57816	3070	42	8.02943
162-982A-17H-3-A 93	154.63	173.63	173.48	5.58065	5.5785	3215	82	8.07558
162-982A-17H-3-A 94	154.64	173.64	173.49	5.58091	5.57884	3442	87	8.14381
162-982A-17H-3-A 97	154.67	173.67	173.52	5.58167	5.57986	4816	84	8.4797
162-982A-17H-3-A 98	154.68	173.68	173.53	5.58192	5.5802	4283	101	8.36241
162-982A-17H-3-A 99	154.69	173.69	173.54	5.58218	5.58054	4149	79	8.33062
162-982A-17H-3-A 102	154.72	173.72	173.57	5.58294	5.58156	4453	89	8.40133
162-982A-17H-3-A 104	154.74	173.74	173.59	5.58345	5.58224	4817	133	8.47991
162-982A-17H-3-A 107	154.77	173.77	173.62	5.58421	5.58326	4526	72	8.41759
162-982A-17H-3-A 108	154.78	173.78	173.63	5.58446	5.5836	4275	82	8.36054
162-982A-17H-3-A 110	154.8	173.8	173.65	5.58497	5.58428	4771	111	8.47031
162-982A-17H-3-A 111	154.81	173.81	173.66	5.58522	5.58462	4224	76	8.34854
162-982A-17H-3-A 113.5	154.84	173.84	173.69	5.58598	5.58564	4241	79	8.35255
162-982A-17H-3-A 117	154.87	173.87	173.72	5.58675	5.58666	4696	50	8.45447
162-982A-17H-3-A 118	154.88	173.88	173.73	5.587	5.587	4761	53	8.46821
162-982A-17H-3-A 121	154.91	173.91	173.76	5.58754	5.58755	4316	61	8.37008
162-982A-17H-3-A 122	154.92	173.92	173.77	5.58772	5.58773	4028	75	8.30103
162-982A-17H-3-A 123	154.93	173.93	173.78	5.5879	5.58792	3848	38	8.25531
162-982A-17H-3-A 126	154.96	173.96	173.81	5.58844	5.58847	3723	62	8.22229
162-982A-17H-3-A 128	154.98	173.98	173.83	5.5888	5.58883	3748	46	8.22898
162-982A-17H-3-A 131	155.01	174.01	173.86	5.58935	5.58938	3590	45	8.18591
162-982A-17H-3-A 132	155.02	174.02	173.87	5.58953	5.58957	3354	75	8.11791
162-982A-17H-3-A 135	155.05	174.05	173.9	5.59007	5.59012	3779	43	8.23721
162-982A-17H-3-A 136	155.06	174.06	173.91	5.59025	5.5903	3767	65	8.23403
162-982A-17H-3-A 139	155.09	174.09	173.94	5.59079	5.59085	3718	68	8.22094
162-982A-17H-3-A 140	155.1	174.1	173.95	5.59097	5.59103	3709	62	8.21852
162-982A-17H-3-A 141	155.11	174.11	173.96	5.59115	5.59122	3543	42	8.17273
162-982A-17H-3-A 144	155.14	174.14	173.99	5.59169	5.59177	3352	26	8.11731
162-982A-17H-3-A 145	155.15	174.15	174	5.59187	5.59195	3041	66	8.01994
162-982A-17H-3-A 146	155.16	174.16	174.01	5.59205	5.59213	2724	93	7.90986
162-982A-17H-3-A 148	155.18	174.18	174.03	5.59241	5.5925	2504	44	7.82564
162-982A-17H-3-A 149	155.19	174.19	174.04	5.59259	5.59268	2259	51	7.72268
162-982A-17H-4-A 3	155.23	174.23	174.08	5.59332	5.59342	2700	27	7.90101
162-982A-17H-4-A 4	155.24	174.24	174.09	5.5935	5.5936	2341	55	7.75833
162-982A-17H-4-A 5	155.25	174.25	174.1	5.59368	5.59378	2324	30	7.75105
162-982A-17H-4-A 8	155.28	174.28	174.13	5.59422	5.59433	2193	50	7.69303
162-982A-17H-4-A 11	155.31	174.31	174.16	5.59476	5.59488	2017	80	7.60937
162-982A-17H-4-A 13	155.33	174.33	174.18	5.59512	5.59525	2088	10	7.64396
162-982A-17H-4-A 14	155.34	174.34	174.19	5.5953	5.59543	1906	8	7.55276
162-982A-17H-4-A 17	155.37	174.37	174.22	5.59584	5.59598	1894	36	7.54645
162-982A-17H-4-A 18	155.38	174.38	174.23	5.59602	5.59617	1794	80	7.4922
162-982A-17H-4-A 19	155.39	174.39	174.24	5.5962	5.59635	1792	19	7.49109
162-982A-17H-4-A 22	155.42	174.42	174.27	5.59674	5.5969	1816	42	7.50439
162-982A-17H-4-A 24	155.44	174.44	174.29	5.59711	5.59727	1544	74	7.34213
162-982A-17H-4-A 26	155.46	174.46	174.31	5.59747	5.59763	1647	52	7.40671
162-982A-17H-4-A 29	155.49	174.49	174.34	5.59801	5.59818	1913	56	7.55643
162-982A-17H-4-A 30	155.5	174.5	174.35	5.59819	5.59837	1880	24	7.53903
162-982A-17H-4-A 32	155.52	174.52	174.37	5.59855	5.59873	1865	61	7.53102
162-982A-17H-4-A 34	155.54	174.54	174.39	5.59891	5.5991	1615	26	7.38709
162-982A-17H-4-A 37	155.57	174.57	174.42	5.59945	5.59965	1629	46	7.39572
162-982A-17H-4-A 38	155.58	174.58	174.43	5.59963	5.59983	1722	46	7.45124
162-982A-17H-4-A 39	155.59	174.59	174.44	5.59981	5.60002	1798	57	7.49443
162-982A-17H-4-A 42	155.62	174.62	174.47	5.60035	5.60057	1747	44	7.46566
162-982A-17H-4-A 44	155.64	174.64	174.49	5.60071	5.60093	1822	55	7.50769
162-982A-17H-4-A 45	155.65	174.65	174.5	5.60089	5.60112	1790	69	7.48997
162-982A-17H-4-A 48	155.68	174.68	174.53	5.60144	5.60167	1746	108	7.46508
162-982A-17H-4-A 51	155.71	174.71	174.56	5.60198	5.60222	1539	38	7.33889
162-982A-17H-4-A 52	155.72	174.72	174.57	5.60216	5.6024	1639	57	7.40184
162-982A-17H-4-A 55	155.75	174.75	174.6	5.6027	5.60295	1527	100	7.33106
162-982A-17H-4-A 56	155.76	174.76	174.61	5.60288	5.60313	1654	11	7.41095
162-982A-17H-4-A 58	155.78	174.78	174.63	5.60324	5.6035	1511	54	7.32053
162-982A-17H-4-A 59	155.79	174.79	174.64	5.60342	5.60368	1590	89	7.37149
162-982A-17H-4-A 61	155.81	174.81	174.66	5.60378	5.60405	1673	50	7.42237
162-982A-17H-4-A 64	155.84	174.84	174.69	5.60432	5.6046	1501	53	7.31389
162-982A-17H-4-A 67	155.87	174.87	174.72	5.60486	5.60515	1639	51	7.40184
162-982A-17H-4-A 68	155.88	174.88	174.73	5.60505	5.60533	1669	52	7.41998
162-982A-17H-4-A 71	155.91	174.91	174.76	5.60559	5.60588	1766	77	7.47647
162-982A-17H-4-A 72	155.92	174.92	174.77	5.60577	5.60607	1529	68	7.33237
162-982A-17H-4-A 74	155.94	174.94	174.79	5.60613	5.60643	1552	57	7.3473
162-982A-17H-4-A 76	155.96	174.96	174.81	5.60649	5.6068	1631	61	7.39695
162-982A-17H-4-A 79	155.99	174.99	174.84	5.60703	5.60735	1715	84	7.44717
162-982A-17H-4-A 80	156	175	174.85	5.60721	5.60753	1609	48	7.38337
162-982A-17H-4-A 82	156.02	175.02	174.87	5.60757	5.6079	1445	30	7.27586
162-982A-17H-4-A 84.5	156.05	175.05	174.9	5.60811	5.60845	1481	65	7.30047
162-982A-17H-4-A 87	156.07	175.07	174.92	5.60847	5.60882	1583	60	7.36708
162-982A-17H-4-A 88	156.08	175.08	174.93	5.60865	5.609	1615	36	7.38709
162-982A-17H-4-A 90	156.1	175.1	174.95	5.60902	5.60937	1494	24	7.30921
162-982A-17H-4-A 91	156.11	175.11	174.96	5.6092	5.60955	1443	24	7.27448
162-982A-17H-4-A 92	156.12	175.12	174.97	5.60938	5.60973	1579	66	7.36455
162-982A-17H-4-A 94	156.14	175.14	174.99	5.60974	5.6101	1567	45	7.35692
162-982A-17H-4-A 96	156.16	175.16	175.01	5.6101	5.61047	1493	51	7.30854
162-982A-17H-4-A 99	156.19	175.19	175.04	5.61064	5.61102	1445	47	7.27586
162-982A-17H-4-A 100	156.2	175.2	175.05	5.61082	5.6112	1476	-1	7.29709
162-982A-17H-4-A 102	156.22	175.22	175.07	5.61118	5.61157	1424	64	7.26123
162-982A-17H-4-A 103	156.23	175.23	175.08	5.61136	5.61175	1690	50	7.43248
162-982A-17H-4-A 104	156.24	175.24	175.09	5.61154	5.61193	1582	41	7.36645
162-982A-17H-4-A 106	156.26	175.26	175.11	5.6119	5.6123	1763	58	7.47477
162-982A-17H-4-A 108	156.28	175.28	175.13	5.61226	5.61267	1798	62	7.49443
162-982A-17H-4-A 109	156.29	175.29	175.14	5.61244	5.61285	1572	8	7.3601
162-982A-17H-4-A 112	156.32	175.32	175.17	5.61298	5.6134	1773	33	7.48043
162-982A-17H-4-A 114	156.34	175.34	175.19	5.61335	5.61377	1654	44	7.41095
162-982A-17H-4-A 116	156.36	175.36	175.21	5.61371	5.61413	1353	78	7.21008
162-982A-17H-4-A 118	156.38	175.38	175.23	5.61407	5.6145	1643	35	7.40428
162-982A-17H-4-A 119	156.39	175.39	175.24	5.61425	5.61468	1674	33	7.42297
162-982A-17H-4-A 122	156.42	175.42	175.27	5.61479	5.61523	1634	39	7.39879
162-982A-17H-4-A 124	156.44	175.44	175.29	5.61515	5.6156	2064	75	7.6324
162-982A-17H-4-A 127	156.47	175.47	175.32	5.61569	5.61615	1718	-1	7.44892
162-982A-17H-4-A 128	156.48	175.48	175.33	5.61587	5.61633	1861	27	7.52887
162-982A-17H-4-A 130	156.5	175.5	175.35	5.61623	5.6167	1861	43	7.52887
162-982A-17H-4-A 131	156.51	175.51	175.36	5.61641	5.61688	1891	12	7.54486
162-982A-17H-4-A 132	156.52	175.52	175.37	5.61659	5.61707	1989	37	7.59539
162-982A-17H-4-A 133	156.53	175.53	175.38	5.61677	5.61725	1950	81	7.57558
162-982A-17H-4-A 136	156.56	175.56	175.41	5.61732	5.6178	1969	69	7.58528
162-982A-17H-4-A 137	156.57	175.57	175.42	5.6175	5.61798	2257	58	7.72179
162-982A-17H-4-A 138	156.58	175.58	175.43	5.61768	5.61817	1950	46	7.57558
162-982A-17H-4-A 139	156.59	175.59	175.44	5.61786	5.61835	2211	64	7.7012
162-982A-17H-4-A 142	156.62	175.62	175.47	5.6184	5.6189	2335	22	7.75577
162-982A-17H-4-A 144	156.64	175.64	175.49	5.61876	5.61927	2361	44	7.76684
162-982A-17H-4-A 146	156.66	175.66	175.51	5.61912	5.61963	2126	51	7.662
162-982A-17H-4-A 148	156.68	175.68	175.53	5.61948	5.62	2260	56	7.72312
162-982A-17H-4-A 149	156.69	175.69	175.54	5.61966	5.62018	2662	59	7.88683
162-982A-17H-5-A 2	156.72	175.72	175.57	5.6202	5.62073	2464	39	7.80954
162-982A-17H-5-A 2	156.72	175.72	175.57	5.6202	5.62073	2464	39	7.80954
162-982A-17H-5-A 5	156.75	175.75	175.6	5.62074	5.62128	2603	77	7.86442
162-982A-17H-5-A 5	156.75	175.75	175.6	5.62074	5.62128	2603	77	7.86442
162-982A-17H-5-A 6	156.76	175.76	175.61	5.62092	5.62147	2669	80	7.88946
162-982A-17H-5-A 6	156.76	175.76	175.61	5.62092	5.62147	2669	80	7.88946
162-982A-17H-5-A 8	156.78	175.78	175.63	5.62129	5.62183	2546	44	7.84228
162-982A-17H-5-A 10	156.8	175.8	175.65	5.62165	5.6222	2440	77	7.79975
162-982A-17H-5-A 12	156.82	175.82	175.67	5.62201	5.62257	2317	72	7.74803
162-982A-17H-5-A 15	156.85	175.85	175.7	5.62255	5.62312	2344	59	7.75961
162-982A-17H-5-A 17	156.87	175.87	175.72	5.62291	5.62348	2209	15	7.7003
162-982A-17H-5-A 18	156.88	175.88	175.73	5.62309	5.62367	2037	17	7.61923
162-982A-17H-5-A 20	156.9	175.9	175.75	5.62345	5.62403	1580	55	7.36518
162-982A-17H-5-A 22	156.92	175.92	175.77	5.62381	5.6244	1674	40	7.42297
162-982A-17H-5-A 25	156.95	175.95	175.8	5.62435	5.62495	1603	25	7.37963
162-982A-17H-5-A 26	156.96	175.96	175.81	5.62453	5.62513	1537	47	7.33759
162-982A-17H-5-A 29	156.99	175.99	175.84	5.62508	5.62568	1377	22	7.22766
162-982A-17H-5-A 30	157	176	175.85	5.62526	5.62587	1646	19	7.4061
162-982A-17H-5-A 31	157.01	176.01	175.86	5.62544	5.62605	1430	55	7.26543
162-982A-17H-5-A 34	157.04	176.04	175.89	5.62598	5.6266	1265	58	7.14283
162-982A-17H-5-A 37	157.07	176.07	175.92	5.62652	5.62715	1393	24	7.23921
162-982A-17H-5-A 39	157.09	176.09	175.94	5.62688	5.62752	1351	28	7.2086
162-982A-17H-5-A 40	157.1	176.1	175.95	5.62706	5.6277	1454	36	7.28207
162-982A-17H-5-A 42	157.12	176.12	175.97	5.62742	5.62807	1245	67	7.12689
162-982A-17H-5-A 44	157.14	176.14	175.99	5.62778	5.62843	1427	31	7.26333
162-982A-17H-5-A 45	157.15	176.15	176	5.62796	5.62862	1200	33	7.09008
162-982A-17H-5-A 48	157.18	176.18	176.03	5.6285	5.62917	1492	40	7.30787
162-982A-17H-5-A 50	157.2	176.2	176.05	5.62886	5.62953	1455	29	7.28276
162-982A-17H-5-A 53	157.23	176.23	176.08	5.62941	5.63008	1563	36	7.35436
162-982A-17H-5-A 54	157.24	176.24	176.09	5.62959	5.63027	1351	72	7.2086
162-982A-17H-5-A 56	157.26	176.26	176.11	5.62995	5.63063	1646	52	7.4061
162-982A-17H-5-A 58	157.28	176.28	176.13	5.63031	5.631	1341	44	7.20117
162-982A-17H-5-A 60	157.3	176.3	176.15	5.63067	5.63137	1496	92	7.31055
162-982A-17H-5-A 62	157.32	176.32	176.17	5.63103	5.63173	1367	38	7.22037
162-982A-17H-5-A 64	157.34	176.34	176.19	5.63139	5.6321	1569	48	7.35819
162-982A-17H-5-A 67	157.37	176.37	176.22	5.63193	5.63265	1670	59	7.42058
162-982A-17H-5-A 68	157.38	176.38	176.23	5.63211	5.63283	1723	42	7.45182
162-982A-17H-5-A 70	157.4	176.4	176.25	5.63247	5.6332	1788	21	7.48885
162-982A-17H-5-A 72	157.42	176.42	176.27	5.63283	5.63357	1691	58	7.43308
162-982A-17H-5-A 73	157.43	176.43	176.28	5.63302	5.63375	1766	41	7.47647
162-982A-17H-5-A 76	157.46	176.46	176.31	5.63356	5.6343	1652	19	7.40974
162-982A-17H-5-A 79	157.49	176.49	176.34	5.6341	5.63485	1820	68	7.50659
162-982A-17H-5-A 80	157.5	176.5	176.35	5.63428	5.63503	1811	73	7.50163
162-982A-17H-5-A 81	157.51	176.51	176.36	5.63446	5.63522	1881	36	7.53956
162-982A-17H-5-A 84	157.54	176.54	176.39	5.635	5.63577	1698	61	7.43721
162-982A-17H-5-A 85	157.55	176.55	176.4	5.63518	5.63595	1695	26	7.43544
162-982A-17H-5-A 88	157.58	176.58	176.43	5.63572	5.6365	1779	60	7.48381
162-982A-17H-5-A 89	157.59	176.59	176.44	5.6359	5.63668	1840	28	7.51752
162-982A-17H-5-A 92	157.62	176.62	176.47	5.63644	5.63723	1812	45	7.50219
162-982A-17H-5-A 93	157.63	176.63	176.48	5.63662	5.63742	1939	41	7.56993
162-982A-17H-5-A 96	157.66	176.66	176.51	5.63717	5.63797	1953	30	7.57712
162-982A-17H-5-A 97	157.67	176.67	176.52	5.63735	5.63815	1876	36	7.5369
162-982A-17H-5-A 100	157.7	176.7	176.55	5.63789	5.6387	2203	65	7.69758
162-982A-17H-5-A 103	157.73	176.73	176.58	5.63843	5.63925	2236	14	7.71244
162-982A-17H-5-A 104	157.74	176.74	176.59	5.63861	5.63943	1887	36	7.54274
162-982A-17H-5-A 106	157.76	176.76	176.61	5.63897	5.6398	2218	41	7.70436
162-982A-17H-5-A 107	157.77	176.77	176.62	5.63915	5.63998	2080	66	7.64012
162-982A-17H-5-A 109.5	157.8	176.8	176.65	5.63969	5.64053	2182	41	7.688
162-982A-17H-5-A 112.5	157.83	176.83	176.68	5.64023	5.64108	2500	39	7.82405
162-982A-17H-5-A 114	157.84	176.84	176.69	5.64041	5.64127	2492	77	7.82084
162-982A-17H-5-A 116	157.86	176.86	176.71	5.64077	5.64163	2686	110	7.89581
162-982A-17H-5-A 117	157.87	176.87	176.72	5.64095	5.64182	2718	32	7.90765
162-982A-17H-5-A 120	157.9	176.9	176.75	5.6415	5.64237	2659	50	7.88571
162-982A-17H-5-A 122	157.92	176.92	176.77	5.64186	5.64273	2760	10	7.92299
162-982A-17H-5-A 124	157.94	176.94	176.79	5.64222	5.6431	2695	63	7.89915
162-982A-17H-5-A 125	157.95	176.95	176.8	5.6424	5.64328	2624	24	7.87246
162-982A-17H-5-A 128	157.98	176.98	176.83	5.64294	5.64383	2286	75	7.73456
162-982A-17H-5-A 130	158	177	176.85	5.6433	5.6442	2497	35	7.82285
162-982A-17H-5-A 132	158.02	177.02	176.87	5.64366	5.64457	2391	51	7.77947
162-982A-17H-5-A 135	158.05	177.05	176.9	5.6442	5.64512	2302	44	7.74153
162-982A-17H-5-A 136	158.06	177.06	176.91	5.64438	5.6453	2189	79	7.6912
162-982A-17H-5-A 139	158.09	177.09	176.94	5.64492	5.64585	2327	30	7.75234
162-982A-17H-5-A 140	158.1	177.1	176.95	5.64511	5.64603	2116	81	7.65728
162-982A-17H-5-A 141	158.11	177.11	176.96	5.64529	5.64622	2213	39	7.7021
162-982A-17H-5-A 144	158.14	177.14	176.99	5.64583	5.64677	2256	71	7.72135
162-982A-17H-5-A 146	158.16	177.16	177.01	5.64619	5.64713	1633	89	7.39817
162-982A-17H-5-A 148	158.18	177.18	177.03	5.64655	5.6475	1641	18	7.40306
162-982A-17H-6-A 2	158.22	177.22	177.07	5.64727	5.64823	1379	27	7.22911
162-982A-17H-6-A 4	158.24	177.24	177.09	5.64763	5.6486	1656	60	7.41216
162-982A-17H-6-A 5	158.25	177.25	177.1	5.64781	5.64878	1631	48	7.39695
162-982A-17H-6-A 7	158.27	177.27	177.12	5.64817	5.64915	1522	34	7.32778
162-982A-17H-6-A 10	158.3	177.3	177.15	5.64871	5.6497	1527	55	7.33106
162-982A-17H-6-A 12	158.32	177.32	177.17	5.64908	5.65007	1612	92	7.38523
162-982A-17H-6-A 14	158.34	177.34	177.19	5.64944	5.65043	1529	27	7.33237
162-982A-17H-6-A 16	158.36	177.36	177.21	5.6498	5.6508	1662	69	7.41578
162-982A-17H-6-A 19	158.39	177.39	177.24	5.65034	5.65135	1647	58	7.40671
162-982A-17H-6-A 22	158.42	177.42	177.27	5.65088	5.6519	1625	47	7.39326
162-982A-17H-6-A 24	158.44	177.44	177.29	5.65124	5.65227	1729	51	7.4553
162-982A-17H-6-A 26	158.46	177.46	177.31	5.6516	5.65263	1932	69	7.56631
162-982A-17H-6-A 28	158.48	177.48	177.33	5.65196	5.653	2022	69	7.61184
162-982A-17H-6-A 30	158.5	177.5	177.35	5.65232	5.65339	1925	78	7.56268
162-982A-17H-6-A 32	158.52	177.52	177.37	5.65268	5.65379	1767	55	7.47704
162-982A-17H-6-A 34	158.54	177.54	177.39	5.65305	5.65418	1826	35	7.50988
162-982A-17H-6-A 36	158.56	177.56	177.41	5.65341	5.65457	1798	24	7.49443
162-982A-17H-6-A 37	158.57	177.57	177.42	5.65359	5.65477	2185	70	7.68937
162-982A-17H-6-A 40	158.6	177.6	177.45	5.65413	5.65536	2066	22	7.63337
162-982A-17H-6-A 42	158.62	177.62	177.47	5.65449	5.65576	1826	37	7.50988
162-982A-17H-6-A 44	158.64	177.64	177.49	5.65485	5.65615	2890	57	7.96901
162-982A-17H-6-A 46	158.66	177.66	177.51	5.65521	5.65654	1779	51	7.48381
162-982A-17H-6-A 47	158.67	177.67	177.52	5.65539	5.65674	1901	69	7.55014
162-982A-17H-6-A 50	158.7	177.7	177.55	5.65593	5.65733	1771	64	7.4793
162-982A-17H-6-A 51	158.71	177.71	177.56	5.65611	5.65753	1506	22	7.31721
162-982A-17H-6-A 54	158.74	177.74	177.59	5.65665	5.65812	1534	44	7.33563
162-982A-17H-6-A 56	158.76	177.76	177.61	5.65702	5.65851	1510	23	7.31986
162-982A-17H-6-A 58	158.78	177.78	177.63	5.65738	5.6589	1515	78	7.32317
162-982A-17H-6-A 59	158.79	177.79	177.64	5.65756	5.6591	1646	36	7.4061
162-982A-17H-6-A 62	158.82	177.82	177.67	5.6581	5.65969	1841	59	7.51806
162-982A-17H-6-A 63	158.83	177.83	177.68	5.65828	5.65989	1819	74	7.50604
162-982A-17H-6-A 65	158.85	177.85	177.7	5.65864	5.66028	2086	38	7.643
162-982A-17H-6-A 68	158.88	177.88	177.73	5.65918	5.66087	1653	33	7.41035
162-982A-17H-6-A 69	158.89	177.89	177.74	5.65936	5.66107	2142	18	7.6695
162-982A-17H-6-A 72	158.92	177.92	177.77	5.6599	5.66166	1405	73	7.24779
162-982A-17H-6-A 75	158.95	177.95	177.8	5.66044	5.66225	1720	42	7.45008
162-982A-17H-6-A 76	158.96	177.96	177.81	5.66062	5.66245	1708	66	7.44308
162-982A-17H-6-A 77	158.97	177.97	177.82	5.6608	5.66264	1728	25	7.45472
162-982A-17H-6-A 81	159.01	178.01	177.86	5.66153	5.66343	1764	54	7.47534
162-982A-17H-6-A 83	159.03	178.03	177.88	5.66189	5.66382	1598	41	7.37651
162-982A-17H-6-A 84	159.04	178.04	177.89	5.66207	5.66402	1762	64	7.4742
162-982A-17H-6-A 85	159.05	178.05	177.9	5.66225	5.66422	2016	46	7.60887
162-982A-17H-6-A 88	159.08	178.08	177.93	5.66279	5.66481	2220	59	7.70526
162-982A-17H-6-A 90	159.1	178.1	177.95	5.66315	5.6652	2229	16	7.70931
162-982A-17H-6-A 91	159.11	178.11	177.96	5.66333	5.6654	2080	66	7.64012
162-982A-17H-6-A 94	159.14	178.14	177.99	5.66387	5.66599	1991	87	7.59639
162-982A-17H-6-A 96	159.16	178.16	178.01	5.66423	5.66638	2159	27	7.6774
162-982A-17H-6-A 98	159.18	178.18	178.03	5.66459	5.66678	2111	38	7.65492
162-982A-17H-6-A 99	159.19	178.19	178.04	5.66477	5.66697	2090	78	7.64492
162-982A-17H-6-A 102	159.22	178.22	178.07	5.66532	5.66756	2041	9	7.6212
162-982A-17H-6-A 104	159.24	178.24	178.09	5.66568	5.66796	2112	45	7.65539
162-982A-17H-6-A 105	159.25	178.25	178.1	5.66586	5.66815	2311	62	7.74544
162-982A-17H-6-A 108	159.28	178.28	178.13	5.6664	5.66874	1881	38	7.53956
162-982A-17H-6-A 110	159.3	178.3	178.15	5.66676	5.66914	2002	51	7.6019
162-982A-17H-6-A 112	159.32	178.32	178.17	5.66712	5.66953	1868	41	7.53262
162-982A-17H-6-A 115	159.35	178.35	178.2	5.66766	5.67012	1765	89	7.47591
162-982A-17H-6-A 117	159.37	178.37	178.22	5.66802	5.67052	1969	38	7.58528
162-982A-17H-6-A 118	159.38	178.38	178.23	5.6682	5.67071	1920	55	7.56008
162-982A-17H-6-A 120	159.4	178.4	178.25	5.66856	5.67111	1763	86	7.47477
162-982A-17H-6-A 123	159.43	178.43	178.28	5.66911	5.6717	1491	89	7.3072
162-982A-17H-6-A 124	159.44	178.44	178.29	5.66929	5.67189	1752	79	7.46851
162-982A-17H-6-A 125	159.45	178.45	178.3	5.66947	5.67209	1664	47	7.41698
162-982A-17H-6-A 128	159.48	178.48	178.33	5.67001	5.67268	1531	74	7.33368
162-982A-17H-6-A 129	159.49	178.49	178.34	5.67019	5.67288	1626	28	7.39388
162-982A-17H-6-A 132	159.52	178.52	178.37	5.67073	5.67347	1380	37	7.22984
162-982A-17H-6-A 134	159.54	178.54	178.39	5.67109	5.67386	1490	41	7.30653
162-982A-17H-6-A 135	159.55	178.55	178.4	5.67127	5.67406	1425	66	7.26193
162-982A-17H-6-A 138	159.58	178.58	178.43	5.67181	5.67465	1491	48	7.3072
162-982A-17H-6-A 140	159.6	178.6	178.45	5.67217	5.67504	1264	42	7.14204
162-982A-17H-6-A 141	159.61	178.61	178.46	5.67235	5.67524	1210	41	7.09838
162-982A-17H-6-A 144	159.64	178.64	178.49	5.67289	5.67583	1301	34	7.17089
162-982A-17H-6-A 147	159.67	178.67	178.52	5.67344	5.67642	1142	33	7.04054
162-982A-17H-6-A 148	159.68	178.68	178.53	5.67362	5.67662	1260	1	7.13887
162-982A-18H-2-A 2	161.72	181.22	181.07	5.71945	5.7205	1581	44	7.36581
162-982A-18H-2-A 4	161.74	181.24	181.09	5.71981	5.72083	1537	42	7.33759
162-982A-18H-2-A 6	161.76	181.26	181.11	5.72017	5.72116	1612	110	7.38523
162-982A-18H-2-A 8	161.78	181.28	181.13	5.72053	5.72149	1713	40	7.446
162-982A-18H-2-A 10	161.8	181.3	181.15	5.72089	5.72182	1690	-9	7.43248
162-982A-18H-2-A 12	161.82	181.32	181.17	5.72126	5.72214	1617	13	7.38833
162-982A-18H-2-A 14	161.84	181.34	181.19	5.72162	5.72247	1793	66	7.49165
162-982A-18H-2-A 15	161.85	181.35	181.2	5.7218	5.72264	1773	74	7.48043
162-982A-18H-2-A 18	161.88	181.38	181.23	5.72234	5.72313	1734	59	7.45819
162-982A-18H-2-A 20	161.9	181.4	181.25	5.7227	5.72346	1697	25	7.43662
162-982A-18H-2-A 22	161.92	181.42	181.27	5.72306	5.72378	1944	23	7.5725
162-982A-18H-2-A 23	161.93	181.43	181.28	5.72324	5.72395	1697	21	7.43662
162-982A-18H-2-A 26	161.96	181.46	181.31	5.72378	5.72444	1705	-1	7.44132
162-982A-18H-2-A 28	161.98	181.48	181.33	5.72414	5.72477	1706	38	7.44191
162-982A-18H-2-A 30	162	181.5	181.35	5.7245	5.7251	1675	47	7.42357
162-982A-18H-2-A 32	162.02	181.52	181.37	5.72486	5.72542	1553	45	7.34794
162-982A-18H-2-A 35	162.05	181.55	181.4	5.72541	5.72592	1832	38	7.51316
162-982A-18H-2-A 36	162.06	181.56	181.41	5.72559	5.72608	1758	62	7.47193
162-982A-18H-2-A 38	162.08	181.58	181.43	5.72595	5.72641	1489	61	7.30586
162-982A-18H-2-A 40	162.1	181.6	181.45	5.72631	5.72674	1520	49	7.32647
162-982A-18H-2-A 41	162.11	181.61	181.46	5.72649	5.7269	1766	80	7.47647
162-982A-18H-2-A 44	162.14	181.64	181.49	5.72703	5.72739	1313	65	7.18007
162-982A-18H-2-A 46	162.16	181.66	181.51	5.72739	5.72772	1565	51	7.35564
162-982A-18H-2-A 48	162.18	181.68	181.53	5.72775	5.72805	2017	32	7.60937
162-982A-18H-2-A 50	162.2	181.7	181.55	5.72811	5.72838	1999	49	7.6004
162-982A-18H-2-A 51	162.21	181.71	181.56	5.72829	5.72854	1786	152	7.48773
162-982A-18H-2-A 54	162.24	181.74	181.59	5.72883	5.72903	1952	38	7.57661
162-982A-18H-2-A 56	162.26	181.76	181.61	5.7292	5.72936	2198	52	7.6953
162-982A-18H-2-A 58	162.28	181.78	181.63	5.72956	5.72969	2030	57	7.61579
162-982A-18H-2-A 60	162.3	181.8	181.65	5.72992	5.73002	2077	7	7.63868
162-982A-18H-2-A 61	162.31	181.81	181.66	5.7301	5.73018	2233	40	7.7111
162-982A-18H-2-A 64	162.34	181.84	181.69	5.73064	5.73067	2546	36	7.84228
162-982A-18H-2-A 66	162.36	181.86	181.71	5.731	5.731	2189	41	7.6912
162-982A-18H-2-A 68	162.38	181.88	181.73	5.73139	5.73134	2755	102	7.92117
162-982A-18H-2-A 71	162.41	181.91	181.76	5.73197	5.73184	3311	57	8.10501
162-982A-18H-2-A 72	162.42	181.92	181.77	5.73217	5.73201	3049	112	8.02257
162-982A-18H-2-A 73	162.43	181.93	181.78	5.73236	5.73218	3497	72	8.15966
162-982A-18H-2-A 76	162.46	181.96	181.81	5.73294	5.73269	3618	68	8.19368
162-982A-18H-2-A 78	162.48	181.98	181.83	5.73333	5.73303	4523	75	8.41693
162-982A-18H-2-A 80	162.5	182	181.85	5.73372	5.73336	6089	145	8.71424
162-982A-18H-2-A 83	162.53	182.03	181.88	5.7343	5.73387	2030	216	7.61579
162-982A-18H-2-A 84	162.54	182.04	181.89	5.7345	5.73404	2030	61	7.61579
162-982A-18H-2-A 86	162.56	182.06	181.91	5.73489	5.73438	2038	61	7.61972
162-982A-18H-2-A 89	162.59	182.09	181.94	5.73547	5.73488	2058	59	7.62949
162-982A-18H-2-A 90	162.6	182.1	181.95	5.73566	5.73505	2077	59	7.63868
162-982A-18H-2-A 92	162.62	182.12	181.97	5.73605	5.73539	2096	59	7.64779
162-982A-18H-2-A 95	162.65	182.15	182	5.73664	5.7359	3657	125	8.2044
162-982A-18H-2-A 96	162.66	182.16	182.01	5.73683	5.73607	4493	83	8.41028
162-982A-18H-2-A 98	162.68	182.18	182.03	5.73722	5.7364	2350	84	7.76217
162-982A-18H-2-A 100	162.7	182.2	182.05	5.73761	5.73674	2716	106	7.90692
162-982A-18H-2-A 101	162.71	182.21	182.06	5.7378	5.73691	1848	22	7.52186
162-982A-18H-2-A 104	162.74	182.24	182.09	5.73839	5.73742	1760	85	7.47307
162-982A-18H-2-A 106	162.76	182.26	182.11	5.73877	5.73775	1731	62	7.45645
162-982A-18H-2-A 108	162.78	182.28	182.13	5.73916	5.73809	1785	49	7.48717
162-982A-18H-2-A 110	162.8	182.3	182.15	5.73955	5.73843	1712	45	7.44542
162-982A-18H-2-A 111	162.81	182.31	182.16	5.73975	5.7386	1711	22	7.44483
162-982A-18H-2-A 114	162.84	182.34	182.19	5.74033	5.73911	1828	49	7.51098
162-982A-18H-2-A 116	162.86	182.36	182.21	5.74072	5.73944	1628	80	7.39511
162-982A-18H-2-A 118	162.88	182.38	182.23	5.74111	5.73978	1648	63	7.40732
162-982A-18H-2-A 121	162.91	182.41	182.26	5.74169	5.74029	1848	64	7.52186
162-982A-18H-2-A 122	162.92	182.42	182.27	5.74188	5.74046	1953	59	7.57712
162-982A-18H-2-A 124	162.94	182.44	182.29	5.74227	5.74079	1942	37	7.57147
162-982A-18H-2-A 126	162.96	182.46	182.31	5.74266	5.74113	1862	55	7.52941
162-982A-18H-2-A 127	162.97	182.47	182.32	5.74286	5.7413	2175	44	7.68478
162-982A-18H-2-A 130	163	182.5	182.35	5.74344	5.74181	2058	38	7.62949
162-982A-18H-2-A 132	163.02	182.52	182.37	5.74383	5.74215	2038	21	7.61972
162-982A-18H-2-A 135	163.05	182.55	182.4	5.74441	5.74265	1921	54	7.5606
162-982A-18H-2-A 136	163.06	182.56	182.41	5.7446	5.74282	2096	49	7.64779
162-982A-18H-2-A 138	163.08	182.58	182.43	5.74499	5.74316	2276	19	7.73017
162-982A-18H-2-A 141	163.11	182.61	182.46	5.74558	5.74367	2304	65	7.7424
162-982A-18H-2-A 142	163.12	182.62	182.47	5.74577	5.74383	2386	33	7.77737
162-982A-18H-2-A 144	163.14	182.64	182.49	5.74616	5.74417	2526	69	7.83439
162-982A-18H-2-A 146	163.16	182.66	182.51	5.74655	5.74451	2443	87	7.80098
162-982A-18H-2-A 148	163.18	182.68	182.53	5.74694	5.74485	2271	53	7.72798
162-982A-18H-3-A 2	163.22	182.72	182.57	5.74771	5.74552	2456	16	7.80629
162-982A-18H-3-A 4	163.24	182.74	182.59	5.7481	5.74586	2680	44	7.89357
162-982A-18H-3-A 6	163.26	182.76	182.61	5.74849	5.7462	2580	65	7.85554
162-982A-18H-3-A 7	163.27	182.77	182.62	5.74869	5.74637	2831	78	7.94839
162-982A-18H-3-A 10	163.3	182.8	182.65	5.74927	5.74687	2805	85	7.93916
162-982A-18H-3-A 12	163.32	182.82	182.67	5.74966	5.74721	2783	71	7.93128
162-982A-18H-3-A 13	163.33	182.83	182.68	5.74985	5.74738	2588	95	7.85864
162-982A-18H-3-A 16	163.36	182.86	182.71	5.75044	5.74789	2253	1	7.72002
162-982A-18H-3-A 17	163.37	182.87	182.72	5.75063	5.74806	2540	23	7.83992
162-982A-18H-3-A 20	163.4	182.9	182.75	5.75121	5.74856	2310	47	7.745
162-982A-18H-3-A 23	163.43	182.93	182.78	5.7518	5.74907	2532	49	7.83676
162-982A-18H-3-A 24	163.44	182.94	182.79	5.75199	5.74924	2459	14	7.80751
162-982A-18H-3-A 26	163.46	182.96	182.81	5.75238	5.74958	2412	91	7.78821
162-982A-18H-3-A 28	163.48	182.98	182.83	5.75277	5.74991	2619	35	7.87055
162-982A-18H-3-A 31	163.51	183.01	182.86	5.75335	5.75042	2515	97	7.83003
162-982A-18H-3-A 32	163.52	183.02	182.87	5.75354	5.75059	2381	25	7.77528
162-982A-18H-3-A 35	163.55	183.05	182.9	5.75413	5.7511	2979	66	7.99934
162-982A-18H-3-A 36	163.56	183.06	182.91	5.75432	5.75126	2752	-18	7.92008
162-982A-18H-3-A 38	163.58	183.08	182.93	5.75471	5.7516	3105	92	8.04077
162-982A-18H-3-A 40	163.6	183.1	182.95	5.7551	5.75194	3074	24	8.03073
162-982A-18H-3-A 43	163.63	183.13	182.98	5.75568	5.75245	3320	32	8.10772
162-982A-18H-3-A 44	163.64	183.14	182.99	5.75588	5.75262	3276	20	8.09438
162-982A-18H-3-A 46	163.66	183.16	183.01	5.75627	5.75295	3331	83	8.11103
162-982A-18H-3-A 48	163.68	183.18	183.03	5.75665	5.75329	3661	49	8.20549
162-982A-18H-3-A 50	163.7	183.2	183.05	5.75704	5.75363	3237	74	8.0824
162-982A-18H-3-A 53	163.73	183.23	183.08	5.75763	5.75414	3124	94	8.04687
162-982A-18H-3-A 54	163.74	183.24	183.09	5.75782	5.7543	3325	108	8.10922
162-982A-18H-3-A 56	163.76	183.26	183.11	5.75821	5.75464	3151	52	8.05548
162-982A-18H-3-A 58	163.78	183.28	183.13	5.7586	5.75498	3311	45	8.10501
162-982A-18H-3-A 60	163.8	183.3	183.15	5.75899	5.75532	3354	3	8.11791
162-982A-18H-3-A 63	163.83	183.33	183.18	5.75957	5.75582	3528	48	8.16849
162-982A-18H-3-A 64	163.84	183.34	183.19	5.75976	5.75599	3538	33	8.17132
162-982A-18H-3-A 65	163.85	183.35	183.2	5.75996	5.75616	3373	73	8.12356
162-982A-18H-3-A 68	163.88	183.38	183.23	5.76054	5.75667	3428	71	8.13973
162-982A-18H-3-A 70	163.9	183.4	183.25	5.76093	5.75701	3063	65	8.02715
162-982A-18H-3-A 72	163.92	183.42	183.27	5.76132	5.75734	3469	73	8.15162
162-982A-18H-3-A 74	163.94	183.44	183.29	5.76171	5.75768	3148	114	8.05452
162-982A-18H-3-A 76	163.96	183.46	183.31	5.7621	5.75802	3152	46	8.05579
162-982A-18H-3-A 78	163.98	183.48	183.33	5.76249	5.75836	3274	65	8.09377
162-982A-18H-3-A 79	163.99	183.49	183.34	5.76268	5.75853	3174	71	8.06275
162-982A-18H-3-A 81	164.01	183.51	183.36	5.76307	5.75886	3407	12	8.13359
162-982A-18H-3-A 84	164.04	183.54	183.39	5.76365	5.75937	3035	49	8.01797
162-982A-18H-3-A 86	164.06	183.56	183.41	5.76404	5.75971	2998	20	8.0057
162-982A-18H-3-A 88	164.08	183.58	183.43	5.76443	5.76005	3379	68	8.12534
162-982A-18H-3-A 90	164.1	183.6	183.45	5.76482	5.76038	3677	90	8.20985
162-982A-18H-3-A 91	164.11	183.61	183.46	5.76501	5.76055	3389	83	8.12829
162-982A-18H-3-A 94	164.14	183.64	183.49	5.76559	5.76106	3328	36	8.11013
162-982A-18H-3-A 97	164.17	183.67	183.52	5.76618	5.76157	3097	65	8.03819
162-982A-18H-3-A 98	164.18	183.68	183.53	5.76637	5.76174	3251	40	8.08672
162-982A-18H-3-A 101	164.21	183.71	183.56	5.76696	5.76224	2713	22	7.90581
162-982A-18H-3-A 102	164.22	183.72	183.57	5.76715	5.76241	2843	26	7.95262
162-982A-18H-3-A 103	164.23	183.73	183.58	5.76734	5.76258	2842	70	7.95226
162-982A-18H-3-A 106	164.26	183.76	183.61	5.76793	5.76309	2748	22	7.91863
162-982A-18H-3-A 109	164.29	183.79	183.64	5.76851	5.76359	2636	34	7.87702
162-982A-18H-3-A 110	164.3	183.8	183.65	5.7687	5.76376	2509	42	7.82764
162-982A-18H-3-A 113	164.33	183.83	183.68	5.76929	5.76427	2433	70	7.79688
162-982A-18H-3-A 114	164.34	183.84	183.69	5.76948	5.76444	2253	9	7.72002
162-982A-18H-3-A 116	164.36	183.86	183.71	5.76987	5.76477	2094	42	7.64683
162-982A-18H-3-A 117	164.37	183.87	183.72	5.77006	5.76494	2172	62	7.6834
162-982A-18H-3-A 120	164.4	183.9	183.75	5.77065	5.76545	2253	64	7.72002
162-982A-18H-3-A 122	164.42	183.92	183.77	5.77104	5.76579	1855	30	7.52564
162-982A-18H-3-A 124	164.44	183.94	183.79	5.77143	5.76613	2258	34	7.72223
162-982A-18H-3-A 126	164.46	183.96	183.81	5.77181	5.76646	1950	65	7.57558
162-982A-18H-3-A 128	164.48	183.98	183.83	5.7722	5.7668	1950	64	7.57558
162-982A-18H-3-A 130	164.5	184	183.85	5.77259	5.76714	1785	26	7.48717
162-982A-18H-3-A 132	164.52	184.02	183.87	5.77298	5.76748	1970	58	7.58579
162-982A-18H-3-A 134	164.54	184.04	183.89	5.77337	5.76781	1690	44	7.43248
162-982A-18H-3-A 136	164.56	184.06	183.91	5.77376	5.76815	1812	40	7.50219
162-982A-18H-3-A 137	164.57	184.07	183.92	5.77395	5.76832	1905	47	7.55224
162-982A-18H-3-A 140	164.6	184.1	183.95	5.77453	5.76883	2017	70	7.60937
162-982A-18H-3-A 141	164.61	184.11	183.96	5.77473	5.769	1940	22	7.57044
162-982A-18H-3-A 144	164.64	184.14	183.99	5.77531	5.7695	1712	130	7.44542
162-982A-18H-3-A 146	164.66	184.16	184.01	5.7757	5.76984	1588	17	7.37023
162-982A-18H-3-A 148	164.68	184.18	184.03	5.77609	5.77018	1888	48	7.54327
162-982A-18H-4-A 2	164.72	184.22	184.07	5.77687	5.77085	1765	11	7.47591
162-982A-18H-4-A 5	164.75	184.25	184.1	5.77745	5.77136	1552	33	7.3473
162-982A-18H-4-A 6	164.76	184.26	184.11	5.77764	5.77153	1755	69	7.47022
162-982A-18H-4-A 8	164.78	184.28	184.13	5.77803	5.77187	1618	24	7.38895
162-982A-18H-4-A 9	164.79	184.29	184.14	5.77823	5.77204	1666	55	7.41818
162-982A-18H-4-A 12	164.82	184.32	184.17	5.77881	5.77254	1740	38	7.46164
162-982A-18H-4-A 15	164.85	184.35	184.2	5.77939	5.77305	1697	13	7.43662
162-982A-18H-4-A 16	164.86	184.36	184.21	5.77959	5.77322	1653	51	7.41035
162-982A-18H-4-A 19	164.89	184.39	184.24	5.78017	5.77373	1445	52	7.27586
162-982A-18H-4-A 20	164.9	184.4	184.25	5.78037	5.77389	1418	11	7.257
162-982A-18H-4-A 22	164.92	184.42	184.27	5.78075	5.77423	1839	34	7.51698
162-982A-18H-4-A 24	164.94	184.44	184.29	5.78114	5.77457	1592	21	7.37275
162-982A-18H-4-A 26	164.96	184.46	184.31	5.78153	5.77491	1568	13	7.35756
162-982A-18H-4-A 28	164.98	184.48	184.33	5.78192	5.77525	1580	49	7.36518
162-982A-18H-4-A 30	165	184.5	184.35	5.78231	5.77558	1562	38	7.35372
162-982A-18H-4-A 32	165.02	184.52	184.37	5.7827	5.77592	1521	53	7.32712
162-982A-18H-4-A 35	165.05	184.55	184.4	5.78328	5.77643	1571	61	7.35947
162-982A-18H-4-A 36	165.06	184.56	184.41	5.78348	5.7766	1699	12	7.4378
162-982A-18H-4-A 38	165.08	184.58	184.43	5.78386	5.77693	1692	39	7.43367
162-982A-18H-4-A 41	165.11	184.61	184.46	5.78445	5.77744	1200	48	7.09008
162-982A-18H-4-A 42	165.12	184.62	184.47	5.78464	5.77761	2138	51	7.66763
162-982A-18H-4-A 45	165.15	184.65	184.5	5.78522	5.77812	1548	104	7.34472
162-982A-18H-4-A 46	165.16	184.66	184.51	5.78542	5.77828	1608	38	7.38275
162-982A-18H-4-A 48	165.18	184.68	184.53	5.78581	5.77862	1522	46	7.32778
162-982A-18H-4-A 51	165.21	184.71	184.56	5.78639	5.77913	1577	4	7.36328
162-982A-18H-4-A 52	165.22	184.72	184.57	5.78658	5.7793	1427	38	7.26333
162-982A-18H-4-A 54	165.24	184.74	184.59	5.78697	5.77964	1769	34	7.47817
162-982A-18H-4-A 55	165.25	184.75	184.6	5.78717	5.7798	1605	-3	7.38088
162-982A-18H-4-A 56	165.26	184.76	184.61	5.78736	5.77997	1606	36	7.3815
162-982A-18H-4-A 58	165.28	184.78	184.63	5.78775	5.78031	1499	53	7.31255
162-982A-18H-4-A 60	165.3	184.8	184.65	5.78814	5.78065	2023	67	7.61234
162-982A-18H-4-A 61	165.31	184.81	184.66	5.78833	5.78082	1770	26	7.47873
162-982A-18H-4-A 64	165.34	184.84	184.69	5.78892	5.78132	1858	34	7.52726
162-982A-18H-4-A 65	165.35	184.85	184.7	5.78911	5.78149	1883	71	7.54062
162-982A-18H-4-A 68	165.38	184.88	184.73	5.78969	5.782	1983	73	7.59237
162-982A-18H-4-A 71	165.41	184.91	184.76	5.79028	5.78266	1887	73	7.54274
162-982A-18H-4-A 72	165.42	184.92	184.77	5.79047	5.78288	1807	103	7.49942
162-982A-18H-4-A 74	165.44	184.94	184.79	5.79086	5.78332	2295	34	7.73849
162-982A-18H-4-A 75	165.45	184.95	184.8	5.79105	5.78354	2231	72	7.71021
162-982A-18H-4-A 78	165.48	184.98	184.83	5.79164	5.7842	2325	106	7.75148
162-982A-18H-4-A 80	165.5	185	184.85	5.79203	5.78464	2332	82	7.75448
162-982A-18H-4-A 83	165.53	185.03	184.88	5.79261	5.7853	2264	62	7.72489
162-982A-18H-4-A 84	165.54	185.04	184.89	5.7928	5.78552	2584	61	7.85709
162-982A-18H-4-A 86	165.56	185.06	184.91	5.79319	5.78596	2948	80	7.98888
162-982A-18H-4-A 89	165.59	185.09	184.94	5.79378	5.78662	3449	91	8.14584
162-982A-18H-4-A 90	165.6	185.1	184.95	5.79397	5.78684	3895	84	8.26745
162-982A-18H-4-A 92	165.62	185.12	184.97	5.79436	5.78728	3408	41	8.13388
[truncated: 3,347 more rows]

## Sheet: Site 982 XRF data Hole B
IODP ID	mbsf	mcd (shipboard)	rmcd (this study)	AgeD17MT (this study)	AgeD17FT (this study)	Silica (counts)	Zirconium (counts)	ln(Silica) (counts)
162-982B-13H-2-A 3	111.53	123.07	123.07	4.55963	4.55963	1415	56	7.25488
162-982B-13H-2-A 4	111.54	123.08	123.08	4.55991	4.55991	1360	47	7.21524
162-982B-13H-2-A 6	111.56	123.1	123.1	4.56046	4.56046	1428	61	7.26403
162-982B-13H-2-A 8	111.58	123.12	123.12	4.56101	4.56101	1335	43	7.19669
162-982B-13H-2-A 10	111.6	123.14	123.14	4.56156	4.56156	1432	73	7.26683
162-982B-13H-2-A 12	111.62	123.16	123.16	4.56211	4.56211	1471	64	7.2937
162-982B-13H-2-A 13	111.63	123.17	123.17	4.56239	4.56239	1356	42	7.21229
162-982B-13H-2-A 16	111.66	123.2	123.2	4.56322	4.56322	1371	50	7.2233
162-982B-13H-2-A 17	111.67	123.21	123.21	4.56349	4.56349	1413	26	7.25347
162-982B-13H-2-A 20	111.7	123.24	123.24	4.56432	4.56432	1161	31	7.05704
162-982B-13H-2-A 22	111.72	123.26	123.26	4.56487	4.56487	1200	31	7.09008
162-982B-13H-2-A 23	111.73	123.27	123.27	4.56515	4.56515	1352	36	7.20934
162-982B-13H-2-A 27	111.77	123.31	123.31	4.56625	4.56625	1156	52	7.05272
162-982B-13H-2-A 34	111.84	123.38	123.38	4.56818	4.56818	1045	36	6.95177
162-982B-13H-2-A 36	111.86	123.4	123.4	4.56873	4.56873	1168	28	7.06305
162-982B-13H-2-A 37	111.87	123.41	123.41	4.56901	4.56901	1059	24	6.96508
162-982B-13H-2-A 40	111.9	123.44	123.44	4.56983	4.56983	1029	-1	6.93634
162-982B-13H-2-A 42	111.92	123.46	123.46	4.57038	4.57038	1079	41	6.98379
162-982B-13H-2-A 43	111.93	123.47	123.47	4.57066	4.57066	963	58	6.87005
162-982B-13H-2-A 46	111.96	123.5	123.5	4.57149	4.57149	946	34	6.85224
162-982B-13H-2-A 48	111.98	123.52	123.52	4.57204	4.57204	1345	43	7.20415
162-982B-13H-2-A 51	112.01	123.55	123.55	4.57286	4.57286	1277	16	7.15227
162-982B-13H-2-A 54	112.04	123.58	123.58	4.57369	4.57369	1342	29	7.20192
162-982B-13H-2-A 56	112.06	123.6	123.6	4.57424	4.57424	1228	38	7.11314
162-982B-13H-2-A 58	112.08	123.62	123.62	4.57479	4.57479	1561	55	7.35308
162-982B-13H-2-A 60	112.1	123.64	123.64	4.57534	4.57534	1605	14	7.38088
162-982B-13H-2-A 63	112.13	123.67	123.67	4.57617	4.57617	1749	67	7.4668
162-982B-13H-2-A 64	112.14	123.68	123.68	4.57645	4.57645	1714	70	7.44659
162-982B-13H-2-A 67	112.17	123.71	123.71	4.57727	4.57727	1784	49	7.48661
162-982B-13H-2-A 68	112.18	123.72	123.72	4.57755	4.57755	1550	97	7.34601
162-982B-13H-2-A 69	112.19	123.73	123.73	4.57783	4.57783	1709	33	7.44366
162-982B-13H-2-A 75	112.25	123.79	123.79	4.57948	4.57948	2354	54	7.76387
162-982B-13H-2-A 76	112.26	123.8	123.8	4.57975	4.57975	2071	52	7.63579
162-982B-13H-2-A 79	112.29	123.83	123.83	4.58058	4.58058	2440	76	7.79975
162-982B-13H-2-A 80	112.3	123.84	123.84	4.58086	4.58086	2267	65	7.72621
162-982B-13H-2-A 82	112.32	123.86	123.86	4.58141	4.58141	2280	42	7.73193
162-982B-13H-2-A 84	112.34	123.88	123.88	4.58196	4.58196	2071	44	7.63579
162-982B-13H-2-A 86	112.36	123.9	123.9	4.58251	4.58251	2079	86	7.63964
162-982B-13H-2-A 88	112.38	123.92	123.92	4.58306	4.58306	2115	69	7.65681
162-982B-13H-2-A 90	112.4	123.94	123.94	4.58361	4.58361	1729	27	7.4553
162-982B-13H-2-A 92	112.42	123.96	123.96	4.58416	4.58416	1594	67	7.374
162-982B-13H-2-A 93	112.43	123.97	123.97	4.58444	4.58444	1407	75	7.24922
162-982B-13H-2-A 96	112.46	124	124	4.58527	4.58527	1494	41	7.30921
162-982B-13H-2-A 98	112.48	124.02	124.02	4.58582	4.58582	1525	78	7.32975
162-982B-13H-2-A 99	112.49	124.03	124.03	4.58609	4.58609	1655	75	7.41156
162-982B-13H-2-A 102	112.52	124.06	124.06	4.58692	4.58692	1767	39	7.47704
162-982B-13H-2-A 103	112.53	124.07	124.07	4.5872	4.5872	1852	44	7.52402
162-982B-13H-2-A 106	112.56	124.1	124.1	4.58802	4.58802	1514	45	7.32251
162-982B-13H-2-A 108	112.58	124.12	124.12	4.58857	4.58857	1474	59	7.29574
162-982B-13H-2-A 109	112.59	124.13	124.13	4.58885	4.58885	1549	78	7.34536
162-982B-13H-2-A 115	112.65	124.19	124.19	4.5905	4.5905	1412	33	7.25276
162-982B-13H-2-A 116	112.66	124.2	124.2	4.59078	4.59078	1513	29	7.32185
162-982B-13H-2-A 118	112.68	124.22	124.22	4.59133	4.59133	1703	38	7.44015
162-982B-13H-2-A 120	112.7	124.24	124.24	4.59188	4.59188	1508	66	7.31854
162-982B-13H-2-A 122	112.72	124.26	124.26	4.59243	4.59243	1433	26	7.26753
162-982B-13H-2-A 125	112.75	124.29	124.29	4.59326	4.59326	1777	54	7.48268
162-982B-13H-2-A 127	112.77	124.31	124.31	4.59381	4.59381	1598	71	7.37651
162-982B-13H-2-A 128	112.78	124.32	124.32	4.59409	4.59409	1496	49	7.31055
162-982B-13H-2-A 130	112.8	124.34	124.34	4.59464	4.59464	1446	49	7.27656
162-982B-13H-2-A 131	112.81	124.35	124.35	4.59491	4.59491	1482	52	7.30115
162-982B-13H-2-A 132	112.82	124.36	124.36	4.59519	4.59519	1360	78	7.21524
162-982B-13H-2-A 133	112.83	124.37	124.37	4.59547	4.59547	1482	55	7.30115
162-982B-13H-2-A 136	112.86	124.4	124.4	4.59629	4.59629	1412	49	7.25276
162-982B-13H-2-A 138	112.88	124.42	124.42	4.59684	4.59684	1466	27	7.29029
162-982B-13H-2-A 139	112.89	124.43	124.43	4.59712	4.59712	1429	50	7.26473
162-982B-13H-2-A 142	112.92	124.46	124.46	4.59795	4.59795	1589	49	7.37086
162-982B-13H-2-A 144	112.94	124.48	124.48	4.5985	4.5985	1464	33	7.28893
162-982B-13H-2-A 147	112.97	124.51	124.51	4.59932	4.59932	1604	44	7.38026
162-982B-13H-2-A 148	112.98	124.52	124.52	4.5996	4.5996	1445	48	7.27586
162-982B-13H-3-A 4	113.04	124.58	124.58	4.60125	4.60125	1704	24	7.44073
162-982B-13H-3-A 6	113.06	124.6	124.6	4.60181	4.60181	1784	77	7.48661
162-982B-13H-3-A 8	113.08	124.62	124.62	4.60236	4.60236	1447	78	7.27725
162-982B-13H-3-A 10	113.1	124.64	124.64	4.60291	4.60291	1499	80	7.31255
162-982B-13H-3-A 13	113.13	124.67	124.67	4.60373	4.60373	1616	75	7.38771
162-982B-13H-3-A 14	113.14	124.68	124.68	4.60401	4.60401	1558	36	7.35116
162-982B-13H-3-A 16	113.16	124.7	124.7	4.60456	4.60456	1384	78	7.23273
162-982B-13H-3-A 18	113.18	124.72	124.72	4.60511	4.60511	1465	38	7.28961
162-982B-13H-3-A 20	113.2	124.74	124.74	4.60566	4.60566	1361	27	7.21598
162-982B-13H-3-A 22	113.22	124.76	124.76	4.60622	4.60622	1365	25	7.21891
162-982B-13H-3-A 25	113.25	124.79	124.79	4.60704	4.60704	1236	65	7.11964
162-982B-13H-3-A 26	113.26	124.8	124.8	4.60732	4.60732	1396	60	7.24137
162-982B-13H-3-A 28	113.28	124.82	124.82	4.60787	4.60787	1406	57	7.2485
162-982B-13H-3-A 29	113.29	124.83	124.83	4.60814	4.60814	1452	48	7.2807
162-982B-13H-3-A 32	113.32	124.86	124.86	4.60897	4.60897	1556	52	7.34987
162-982B-13H-3-A 33	113.33	124.87	124.87	4.60925	4.60925	1303	73	7.17242
162-982B-13H-3-A 36	113.36	124.9	124.9	4.61007	4.61007	1590	99	7.37149
162-982B-13H-3-A 37	113.37	124.91	124.91	4.61035	4.61035	1480	72	7.2998
162-982B-13H-3-A 38.5	113.39	124.93	124.93	4.6109	4.6109	1604	-13	7.38026
162-982B-13H-3-A 43	113.43	124.97	124.97	4.612	4.612	1408	59	7.24993
162-982B-13H-3-A 44	113.44	124.98	124.98	4.61228	4.61228	1602	45	7.37901
162-982B-13H-3-A 46	113.46	125	125	4.61283	4.61283	1577	76	7.36328
162-982B-13H-3-A 48	113.48	125.02	125.02	4.61338	4.61338	1874	69	7.53583
162-982B-13H-3-A 50	113.5	125.04	125.04	4.61393	4.61393	1986	75	7.59388
162-982B-13H-3-A 53	113.53	125.07	125.07	4.61476	4.61476	1599	61	7.37713
162-982B-13H-3-A 57	113.57	125.11	125.11	4.61586	4.61586	1921	24	7.5606
162-982B-13H-3-A 58	113.58	125.12	125.12	4.61614	4.61614	2087	47	7.64348
162-982B-13H-3-A 60	113.6	125.14	125.14	4.61669	4.61669	1978	72	7.58984
162-982B-13H-3-A 62	113.62	125.16	125.16	4.61724	4.61724	2052	38	7.62657
162-982B-13H-3-A 64	113.64	125.18	125.18	4.61779	4.61779	2027	37	7.61431
162-982B-13H-3-A 66.5	113.67	125.21	125.21	4.61862	4.61862	2355	55	7.7643
162-982B-13H-3-A 70	113.7	125.24	125.24	4.61945	4.61945	2203	39	7.69758
162-982B-13H-3-A 71	113.71	125.25	125.25	4.61972	4.61972	2474	52	7.81359
162-982B-13H-3-A 75	113.75	125.29	125.29	4.62082	4.62082	1786	65	7.48773
162-982B-13H-3-A 78	113.78	125.32	125.32	4.62165	4.62165	2493	48	7.82124
162-982B-13H-3-A 83.5	113.84	125.38	125.38	4.6233	4.6233	2337	35	7.75662
162-982B-13H-3-A 86	113.86	125.4	125.4	4.62386	4.62386	2239	72	7.71378
162-982B-13H-3-A 88	113.88	125.42	125.42	4.62441	4.62441	2046	53	7.62364
162-982B-13H-3-A 90	113.9	125.44	125.44	4.62496	4.62496	2111	63	7.65492
162-982B-13H-3-A 91	113.91	125.45	125.45	4.62523	4.62523	2178	87	7.68616
162-982B-13H-3-A 94	113.94	125.48	125.48	4.62606	4.62606	1868	58	7.53262
162-982B-13H-3-A 96	113.96	125.5	125.5	4.62661	4.62661	1857	60	7.52672
162-982B-13H-3-A 99	113.99	125.53	125.53	4.62744	4.62744	1804	80	7.49776
162-982B-13H-3-A 100	114	125.54	125.54	4.62771	4.62771	1970	52	7.58579
162-982B-13H-3-A 102	114.02	125.56	125.56	4.62827	4.62827	1780	73	7.48437
162-982B-13H-3-A 103	114.03	125.57	125.57	4.62854	4.62854	1768	38	7.4776
162-982B-13H-3-A 104	114.04	125.58	125.58	4.62882	4.62882	1713	76	7.446
162-982B-13H-3-A 106	114.06	125.6	125.6	4.62937	4.62937	1902	64	7.55066
162-982B-13H-3-A 107	114.07	125.61	125.61	4.62964	4.62964	1817	19	7.50494
162-982B-13H-3-A 110	114.1	125.64	125.64	4.63047	4.63047	1845	61	7.52023
162-982B-13H-3-A 111	114.11	125.65	125.65	4.63075	4.63075	1860	46	7.52833
162-982B-13H-3-A 114	114.14	125.68	125.68	4.63157	4.63157	1881	33	7.53956
162-982B-13H-3-A 116	114.16	125.7	125.7	4.63212	4.63212	1821	58	7.50714
162-982B-13H-3-A 117	114.17	125.71	125.71	4.6324	4.6324	1617	68	7.38833
162-982B-13H-3-A 118	114.18	125.72	125.72	4.63268	4.63268	1498	59	7.31189
162-982B-13H-3-A 119	114.19	125.73	125.73	4.63295	4.63295	1650	69	7.40853
162-982B-13H-3-A 123.5	114.24	125.78	125.78	4.63433	4.63433	1629	23	7.39572
162-982B-13H-3-A 125.5	114.26	125.8	125.8	4.63488	4.63488	1592	53	7.37275
162-982B-13H-3-A 127.5	114.28	125.82	125.82	4.63543	4.63543	1540	47	7.33954
162-982B-13H-3-A 130	114.3	125.84	125.84	4.63598	4.63598	1539	54	7.33889
162-982B-13H-3-A 132	114.32	125.86	125.86	4.63653	4.63653	1502	10	7.31455
162-982B-13H-3-A 135	114.35	125.89	125.89	4.63736	4.63736	1226	72	7.11151
162-982B-13H-3-A 136	114.36	125.9	125.9	4.63764	4.63764	1343	77	7.20266
162-982B-13H-3-A 138	114.38	125.92	125.92	4.63819	4.63819	1282	46	7.15618
162-982B-13H-3-A 140	114.4	125.94	125.94	4.63874	4.63874	1217	-1	7.10414
162-982B-13H-3-A 141	114.41	125.95	125.95	4.63902	4.63902	1322	40	7.1869
162-982B-13H-3-A 142	114.42	125.96	125.96	4.63929	4.63929	1339	95	7.19968
162-982B-13H-3-A 143	114.43	125.97	125.97	4.63957	4.63957	1107	41	7.00941
162-982B-13H-3-A 146	114.46	126	126	4.64039	4.64039	1881	30	7.53956
162-982B-13H-4-A 1	114.51	126.05	126.05	4.64177	4.64177	1440	66	7.2724
162-982B-13H-4-A 2	114.52	126.06	126.06	4.64205	4.64205	1509	34	7.3192
162-982B-13H-4-A 4	114.54	126.08	126.08	4.6426	4.6426	1444	90	7.27517
162-982B-13H-4-A 6	114.56	126.1	126.1	4.64315	4.64315	1420	53	7.25841
162-982B-13H-4-A 7	114.57	126.11	126.11	4.64343	4.64343	1256	48	7.13569
162-982B-13H-4-A 9	114.59	126.13	126.13	4.64398	4.64398	1300	39	7.17012
162-982B-13H-4-A 14	114.64	126.18	126.18	4.64535	4.64535	1382	9	7.23129
162-982B-13H-4-A 15	114.65	126.19	126.19	4.64563	4.64563	1268	47	7.1452
162-982B-13H-4-A 18	114.68	126.22	126.22	4.64646	4.64646	1234	24	7.11802
162-982B-13H-4-A 20	114.7	126.24	126.24	4.64701	4.64701	1170	43	7.06476
162-982B-13H-4-A 22	114.72	126.26	126.26	4.64756	4.64756	1158	29	7.05445
162-982B-13H-4-A 23	114.73	126.27	126.27	4.64784	4.64784	1359	80	7.2145
162-982B-13H-4-A 26	114.76	126.3	126.3	4.64866	4.64866	1401	37	7.24494
162-982B-13H-4-A 28	114.78	126.32	126.32	4.64921	4.64921	1336	39	7.19744
162-982B-13H-4-A 30	114.8	126.34	126.34	4.64976	4.64976	1229	16	7.11396
162-982B-13H-4-A 31	114.81	126.35	126.35	4.65004	4.65004	1354	98	7.21082
162-982B-13H-4-A 34	114.84	126.38	126.38	4.65087	4.65087	1397	52	7.24208
162-982B-13H-4-A 35.5	114.86	126.4	126.4	4.65142	4.65142	1407	57	7.24922
162-982B-13H-4-A 38	114.88	126.42	126.42	4.65197	4.65197	1567	45	7.35692
162-982B-13H-4-A 40	114.9	126.44	126.44	4.65252	4.65252	1574	34	7.36138
162-982B-13H-4-A 42	114.92	126.46	126.46	4.65307	4.65307	1790	77	7.48997
162-982B-13H-4-A 44	114.94	126.48	126.48	4.65362	4.65362	1445	66	7.27586
162-982B-13H-4-A 46	114.96	126.5	126.5	4.65417	4.65417	1476	39	7.29709
162-982B-13H-4-A 53	115.03	126.57	126.57	4.6561	4.6561	1863	54	7.52994
162-982B-13H-4-A 55	115.05	126.59	126.59	4.65666	4.65666	2074	12	7.63723
162-982B-13H-4-A 58	115.08	126.62	126.62	4.65748	4.65748	1895	82	7.54697
162-982B-13H-4-A 59	115.09	126.63	126.63	4.65776	4.65776	1970	123	7.58579
162-982B-13H-4-A 62	115.12	126.66	126.66	4.65858	4.65858	2434	98	7.79729
162-982B-13H-4-A 63	115.13	126.67	126.67	4.65886	4.65886	2169	12	7.68202
162-982B-13H-4-A 66	115.16	126.7	126.7	4.65969	4.65969	2331	94	7.75405
162-982B-13H-4-A 67	115.17	126.71	126.71	4.65996	4.65996	2601	82	7.86365
162-982B-13H-4-A 69.5	115.2	126.74	126.74	4.66079	4.66079	2661	48	7.88646
162-982B-13H-4-A 71.5	115.22	126.76	126.76	4.66134	4.66134	2428	32	7.79482
162-982B-13H-4-A 74	115.24	126.78	126.78	4.66189	4.66189	2805	82	7.93916
162-982B-13H-4-A 75	115.25	126.79	126.79	4.66217	4.66217	2655	35	7.8842
162-982B-13H-4-A 77.5	115.28	126.82	126.82	4.66299	4.66299	2621	105	7.87131
162-982B-13H-4-A 80	115.3	126.84	126.84	4.66355	4.66355	2696	81	7.89952
162-982B-13H-4-A 82	115.32	126.86	126.86	4.6641	4.6641	2233	53	7.7111
162-982B-13H-4-A 83	115.33	126.87	126.87	4.66437	4.66437	2669	65	7.88946
162-982B-13H-4-A 84	115.34	126.88	126.88	4.66465	4.66465	2491	78	7.82044
162-982B-13H-4-A 86	115.36	126.9	126.9	4.6652	4.6652	2562	100	7.84854
162-982B-13H-4-A 88	115.38	126.92	126.92	4.66575	4.66575	2513	59	7.82923
162-982B-13H-4-A 89	115.39	126.93	126.93	4.66603	4.66603	2445	49	7.8018
162-982B-13H-4-A 93	115.43	126.97	126.97	4.66713	4.66713	2030	85	7.61579
162-982B-13H-4-A 94	115.44	126.98	126.98	4.66741	4.66741	2373	118	7.77191
162-982B-13H-4-A 98	115.48	127.02	127.02	4.66851	4.66851	3331	70	8.11103
162-982B-13H-4-A 102	115.52	127.06	127.06	4.66961	4.66961	4060	156	8.30894
162-982B-13H-4-A 103	115.53	127.07	127.07	4.66989	4.66989	4618	99	8.43772
162-982B-13H-4-A 105.5	115.56	127.1	127.1	4.67071	4.67071	3024	127	8.01434
162-982B-13H-4-A 108	115.58	127.12	127.12	4.67126	4.67126	2147	90	7.67183
162-982B-13H-4-A 110.5	115.61	127.15	127.15	4.67209	4.67209	2044	26	7.62266
162-982B-13H-4-A 111.5	115.62	127.16	127.16	4.67237	4.67237	2602	82	7.86404
162-982B-13H-4-A 114	115.64	127.18	127.18	4.67292	4.67292	1964	61	7.58274
162-982B-13H-4-A 116	115.66	127.2	127.2	4.67347	4.67347	1715	46	7.44717
162-982B-13H-4-A 119	115.69	127.23	127.23	4.6743	4.6743	1708	16	7.44308
162-982B-13H-4-A 120	115.7	127.24	127.24	4.67457	4.67457	1852	28	7.52402
162-982B-13H-4-A 121	115.71	127.25	127.25	4.67485	4.67485	1793	38	7.49165
162-982B-13H-4-A 123	115.73	127.27	127.27	4.6754	4.6754	1629	76	7.39572
162-982B-13H-4-A 125	115.75	127.29	127.29	4.67595	4.67595	1654	50	7.41095
162-982B-13H-4-A 126	115.76	127.3	127.3	4.67623	4.67623	1831	17	7.51262
162-982B-13H-4-A 128	115.78	127.32	127.32	4.67678	4.67678	1499	55	7.31255
162-982B-13H-4-A 129	115.79	127.33	127.33	4.67705	4.67705	1547	59	7.34407
162-982B-13H-4-A 135	115.85	127.39	127.39	4.67871	4.67871	1529	35	7.33237
162-982B-13H-4-A 137	115.87	127.41	127.41	4.67926	4.67926	1725	55	7.45298
162-982B-13H-4-A 138	115.88	127.42	127.42	4.67953	4.67953	1465	65	7.28961
162-982B-13H-4-A 141	115.91	127.45	127.45	4.68036	4.68036	1594	47	7.374
162-982B-13H-4-A 142	115.92	127.46	127.46	4.68064	4.68064	1489	58	7.30586
162-982B-13H-4-A 145	115.95	127.49	127.49	4.68146	4.68146	1348	65	7.20638
162-982B-13H-4-A 146	115.96	127.5	127.5	4.68174	4.68174	1574	21	7.36138
162-982B-13H-5-A 2	116.02	127.56	127.56	4.68339	4.68339	1754	73	7.46965
162-982B-13H-5-A 6	116.06	127.6	127.6	4.68449	4.68449	1480	16	7.2998
162-982B-13H-5-A 9	116.09	127.63	127.63	4.68532	4.68532	1663	22	7.41638
162-982B-13H-5-A 10	116.1	127.64	127.64	4.6856	4.6856	1516	16	7.32383
162-982B-13H-5-A 11	116.11	127.65	127.65	4.68587	4.68587	1598	73	7.37651
162-982B-13H-5-A 16	116.16	127.7	127.7	4.68725	4.68725	1336	38	7.19744
162-982B-13H-5-A 18	116.18	127.72	127.72	4.6878	4.6878	1266	28	7.14362
162-982B-13H-5-A 19	116.19	127.73	127.73	4.68808	4.68808	1500	88	7.31322
162-982B-13H-5-A 26	116.26	127.8	127.8	4.69001	4.69001	1325	40	7.18917
162-982B-13H-5-A 31	116.31	127.85	127.85	4.69138	4.69138	1761	42	7.47364
162-982B-13H-5-A 32	116.32	127.86	127.86	4.69166	4.69166	1578	50	7.36391
162-982B-13H-5-A 37	116.37	127.91	127.91	4.69304	4.69304	1470	42	7.29302
162-982B-13H-5-A 39	116.39	127.93	127.93	4.69359	4.69359	1408	38	7.24993
162-982B-13H-5-A 42	116.42	127.96	127.96	4.69442	4.69442	1376	70	7.22694
162-982B-13H-5-A 44	116.44	127.98	127.98	4.69497	4.69497	1371	49	7.2233
162-982B-13H-5-A 47	116.47	128.01	128.01	4.69579	4.69579	1616	58	7.38771
162-982B-13H-5-A 48	116.48	128.02	128.02	4.69607	4.69607	1662	52	7.41578
162-982B-13H-5-A 51	116.51	128.05	128.05	4.6969	4.6969	1825	56	7.50934
162-982B-13H-5-A 52	116.52	128.06	128.06	4.69717	4.69717	1720	26	7.45008
162-982B-13H-5-A 54	116.54	128.08	128.08	4.69772	4.69772	1590	78	7.37149
162-982B-13H-5-A 56	116.56	128.1	128.1	4.69817	4.69819	1627	72	7.39449
162-982B-13H-5-A 57	116.57	128.11	128.11	4.69834	4.69837	1682	42	7.42774
162-982B-13H-5-A 64	116.64	128.18	128.18	4.69953	4.69968	1667	63	7.41878
162-982B-13H-5-A 65	116.65	128.19	128.19	4.6997	4.69986	1562	47	7.35372
162-982B-13H-5-A 68	116.68	128.22	128.22	4.70021	4.70042	1585	62	7.36834
162-982B-13H-5-A 69	116.69	128.23	128.23	4.70038	4.70061	1620	75	7.39018
162-982B-13H-5-A 73	116.73	128.27	128.27	4.70106	4.70135	1608	75	7.38275
162-982B-13H-5-A 74	116.74	128.28	128.28	4.70123	4.70154	1711	49	7.44483
162-982B-13H-5-A 76	116.76	128.3	128.3	4.70157	4.70191	1569	50	7.35819
162-982B-13H-5-A 81	116.81	128.35	128.35	4.70242	4.70284	1618	54	7.38895
162-982B-13H-5-A 82	116.82	128.36	128.36	4.70259	4.70303	1648	86	7.40732
162-982B-13H-5-A 83	116.83	128.37	128.37	4.70276	4.70321	1596	32	7.37526
162-982B-13H-5-A 86	116.86	128.4	128.4	4.70327	4.70377	1628	34	7.39511
162-982B-13H-5-A 89	116.89	128.43	128.43	4.70378	4.70433	1587	5	7.3696
162-982B-13H-5-A 90	116.9	128.44	128.44	4.70395	4.70452	1508	110	7.31854
162-982B-13H-5-A 93	116.93	128.47	128.47	4.70446	4.70508	1064	58	6.96979
162-982B-13H-5-A 97	116.97	128.51	128.51	4.70514	4.70582	1264	75	7.14204
162-982B-13H-5-A 98	116.98	128.52	128.52	4.70531	4.70601	1326	67	7.18992
162-982B-13H-5-A 104	117.04	128.58	128.58	4.70633	4.70712	1206	34	7.09506
162-982B-13H-5-A 105	117.05	128.59	128.59	4.7065	4.70731	1180	42	7.07327
162-982B-13H-5-A 108	117.08	128.62	128.62	4.70701	4.70787	1280	69	7.15462
162-982B-13H-5-A 109	117.09	128.63	128.63	4.70718	4.70805	1096	50	6.99942
162-982B-13H-5-A 112	117.12	128.66	128.66	4.70769	4.70861	1414	49	7.25418
162-982B-13H-5-A 113	117.13	128.67	128.67	4.70786	4.7088	1434	59	7.26822
162-982B-13H-5-A 117	117.17	128.71	128.71	4.70854	4.70954	1536	46	7.33694
162-982B-13H-5-A 118	117.18	128.72	128.72	4.70871	4.70973	1506	46	7.31721
162-982B-13H-5-A 121	117.21	128.75	128.75	4.70923	4.71029	1473	27	7.29506
162-982B-13H-5-A 122	117.22	128.76	128.76	4.7094	4.71047	1489	52	7.30586
162-982B-13H-5-A 125	117.25	128.79	128.79	4.70991	4.71103	1587	78	7.3696
162-982B-13H-5-A 126	117.26	128.8	128.8	4.71008	4.71122	1443	43	7.27448
162-982B-13H-5-A 128.5	117.29	128.83	128.83	4.71059	4.71178	1529	41	7.33237
162-982B-13H-5-A 129.5	117.3	128.84	128.84	4.71076	4.71196	1325	74	7.18917
162-982B-13H-5-A 132.5	117.33	128.87	128.87	4.71127	4.71252	1462	79	7.28756
162-982B-13H-5-A 133.4	117.33	128.87	128.87	4.71127	4.71252	1118	102	7.0193
162-982B-13H-5-A 136	117.36	128.9	128.9	4.71178	4.71308	1401	29	7.24494
162-982B-13H-5-A 137	117.37	128.91	128.91	4.71195	4.71327	1412	50	7.25276
162-982B-13H-5-A 143.5	117.44	128.98	128.98	4.71314	4.71457	1335	44	7.19669
162-982B-13H-5-A 146	117.46	129	129	4.71348	4.71494	1328	81	7.19143
162-982B-13H-5-A 148	117.48	129.02	129.02	4.71382	4.71532	1428	57	7.26403
162-982B-13H-6-A 2	117.52	129.06	129.06	4.7145	4.71606	1526	45	7.33041
162-982B-13H-6-A 3	117.53	129.07	129.07	4.71467	4.71625	1479	72	7.29912
162-982B-13H-6-A 5.5	117.56	129.1	129.1	4.71518	4.71681	1383	30	7.23201
162-982B-13H-6-A 8	117.58	129.12	129.12	4.71552	4.71718	1428	53	7.26403
162-982B-13H-6-A 11	117.61	129.15	129.15	4.71603	4.71774	1356	18	7.21229
162-982B-13H-6-A 12	117.62	129.16	129.16	4.7162	4.71792	1371	43	7.2233
162-982B-13H-6-A 13	117.63	129.17	129.17	4.71637	4.71811	1538	52	7.33824
162-982B-13H-6-A 16	117.66	129.2	129.2	4.71688	4.71867	1154	14	7.05099
162-982B-13H-6-A 19	117.69	129.23	129.23	4.71739	4.71923	1443	73	7.27448
162-982B-13H-6-A 20	117.7	129.24	129.24	4.71756	4.71941	1376	36	7.22694
162-982B-13H-6-A 24	117.74	129.28	129.28	4.71824	4.72016	1298	42	7.16858
162-982B-13H-6-A 27	117.77	129.31	129.31	4.71875	4.72072	1444	59	7.27517
162-982B-13H-6-A 28	117.78	129.32	129.32	4.71892	4.7209	1726	36	7.45356
162-982B-13H-6-A 29	117.79	129.33	129.33	4.71909	4.72109	1600	40	7.37776
162-982B-13H-6-A 34	117.84	129.38	129.38	4.71994	4.72202	1651	60	7.40914
162-982B-13H-6-A 37	117.87	129.41	129.41	4.72045	4.72258	1626	35	7.39388
162-982B-13H-6-A 38	117.88	129.42	129.42	4.72062	4.72276	1651	43	7.40914
162-982B-13H-6-A 41	117.91	129.45	129.45	4.72113	4.72332	1616	70	7.38771
162-982B-13H-6-A 43	117.93	129.47	129.47	4.72147	4.72369	1664	58	7.41698
162-982B-13H-6-A 44	117.94	129.48	129.48	4.72164	4.72388	1672	53	7.42178
162-982B-13H-6-A 46	117.96	129.5	129.5	4.72198	4.72425	1803	89	7.49721
162-982B-13H-6-A 51	118.01	129.55	129.55	4.72283	4.72518	1901	39	7.55014
162-982B-13H-6-A 52	118.02	129.56	129.56	4.723	4.72537	2150	61	7.67322
162-982B-13H-6-A 53	118.03	129.57	129.57	4.72317	4.72556	2172	92	7.6834
162-982B-13H-6-A 56	118.06	129.6	129.6	4.72368	4.72612	2085	86	7.64252
162-982B-13H-6-A 57	118.07	129.61	129.61	4.72385	4.7263	2239	59	7.71378
162-982B-13H-6-A 61	118.11	129.65	129.65	4.72453	4.72705	2173	61	7.68386
162-982B-13H-6-A 62	118.12	129.66	129.66	4.7247	4.72723	2203	31	7.69758
162-982B-13H-6-A 67	118.17	129.71	129.71	4.72555	4.72816	2257	19	7.72179
162-982B-13H-6-A 68	118.18	129.72	129.72	4.72572	4.72835	2372	46	7.77149
162-982B-13H-6-A 73.5	118.24	129.78	129.78	4.72674	4.72947	2487	60	7.81883
162-982B-13H-6-A 76	118.26	129.8	129.8	4.72708	4.72984	2436	93	7.79811
162-982B-13H-6-A 78	118.28	129.82	129.82	4.72742	4.73021	2307	38	7.7437
162-982B-13H-6-A 79	118.29	129.83	129.83	4.72759	4.7304	2301	69	7.7411
162-982B-13H-6-A 82	118.32	129.86	129.86	4.7281	4.73096	2296	52	7.73892
162-982B-13H-6-A 83	118.33	129.87	129.87	4.72827	4.73114	2423	47	7.79276
162-982B-13H-6-A 85.5	118.36	129.9	129.9	4.72878	4.7317	2450	24	7.80384
162-982B-13H-6-A 88	118.38	129.92	129.92	4.72912	4.73207	2353	103	7.76345
162-982B-13H-6-A 90	118.4	129.94	129.94	4.72946	4.73245	1757	55	7.47136
162-982B-13H-6-A 92	118.42	129.96	129.96	4.7298	4.73282	1875	38	7.53636
162-982B-13H-6-A 94	118.44	129.98	129.98	4.73014	4.73319	1609	96	7.38337
162-982B-13H-6-A 97	118.47	130.01	130.01	4.73066	4.73375	1427	50	7.26333
162-982B-13H-6-A 98	118.48	130.02	130.02	4.73083	4.73394	1459	78	7.28551
162-982B-13H-6-A 101	118.51	130.05	130.05	4.73134	4.73449	1427	58	7.26333
162-982B-13H-6-A 102	118.52	130.06	130.06	4.73151	4.73468	1362	65	7.21671
162-982B-13H-6-A 103	118.53	130.07	130.07	4.73168	4.73487	1510	31	7.31986
162-982B-13H-6-A 104	118.54	130.08	130.08	4.73185	4.73505	1564	28	7.355
162-982B-13H-6-A 107	118.57	130.11	130.11	4.73236	4.73561	1314	16	7.18083
162-982B-13H-6-A 108	118.58	130.12	130.12	4.73253	4.7358	1361	66	7.21598
162-982B-13H-6-A 109	118.59	130.13	130.13	4.7327	4.73598	1297	47	7.16781
162-982B-13H-6-A 115	118.65	130.19	130.19	4.73372	4.7371	1302	58	7.17166
162-982B-13H-6-A 116	118.66	130.2	130.2	4.73389	4.73729	1183	21	7.07581
162-982B-13H-6-A 118	118.68	130.22	130.22	4.73423	4.73766	1255	24	7.13489
162-982B-13H-6-A 119	118.69	130.23	130.23	4.7344	4.73785	1385	44	7.23346
162-982B-13H-6-A 122	118.72	130.26	130.26	4.73491	4.7384	1484	48	7.3025
162-982B-13H-6-A 124	118.74	130.28	130.28	4.73525	4.73878	1594	49	7.374
162-982B-13H-6-A 125	118.75	130.29	130.29	4.73542	4.73896	1408	52	7.24993
162-982B-13H-6-A 128	118.78	130.32	130.32	4.73593	4.73952	1560	49	7.35244
162-982B-13H-6-A 130	118.8	130.34	130.34	4.73627	4.73989	1586	37	7.36897
162-982B-13H-6-A 132.5	118.83	130.37	130.37	4.73678	4.74045	1563	36	7.35436
162-982B-13H-6-A 135	118.85	130.39	130.39	4.73712	4.74082	1695	69	7.43544
162-982B-13H-6-A 136	118.86	130.4	130.4	4.73729	4.74101	1629	59	7.39572
162-982B-13H-6-A 137	118.87	130.41	130.41	4.73746	4.7412	1609	101	7.38337
162-982B-13H-6-A 140.5	118.91	130.45	130.45	4.73814	4.74194	1533	43	7.33498
162-982B-13H-6-A 143	118.93	130.47	130.47	4.73848	4.74231	1532	46	7.33433
162-982B-13H-6-A 144	118.94	130.48	130.48	4.73865	4.7425	1375	22	7.22621
162-982B-13H-6-A 146	118.96	130.5	130.5	4.73899	4.74287	1270	52	7.14677
162-982B-13H-6-A 148	118.98	130.52	130.52	4.73933	4.74324	1539	2	7.33889
162-982B-14H-1-A 5	119.55	132.15	132.05	4.76535	4.77173	1721	68	7.45066
162-982B-14H-1-A 6	119.56	132.16	132.06	4.76552	4.77192	1608	12	7.38275
162-982B-14H-1-A 8	119.58	132.18	132.08	4.76586	4.77229	1597	57	7.37588
162-982B-14H-1-A 10	119.6	132.2	132.1	4.7662	4.77266	1579	24	7.36455
162-982B-14H-1-A 12	119.62	132.22	132.12	4.76654	4.77304	1815	52	7.50384
162-982B-14H-1-A 16	119.66	132.26	132.16	4.76722	4.77378	2018	62	7.60986
162-982B-14H-1-A 18	119.68	132.28	132.18	4.76756	4.77415	2335	32	7.75577
162-982B-14H-1-A 20	119.7	132.3	132.2	4.7679	4.77453	2279	53	7.73149
162-982B-14H-1-A 22	119.72	132.32	132.22	4.76824	4.7749	2387	97	7.77779
162-982B-14H-1-A 24	119.74	132.34	132.24	4.76858	4.77527	2838	57	7.95085
162-982B-14H-1-A 26	119.76	132.36	132.26	4.76892	4.77564	2675	42	7.8917
162-982B-14H-1-A 27	119.77	132.37	132.27	4.76909	4.77583	2690	56	7.8973
162-982B-14H-1-A 30	119.8	132.4	132.3	4.7696	4.77639	2980	66	7.99968
162-982B-14H-1-A 32	119.82	132.42	132.32	4.76994	4.77676	2879	55	7.9652
162-982B-14H-1-A 33	119.83	132.43	132.33	4.77011	4.77695	3480	100	8.15479
162-982B-14H-1-A 34	119.84	132.44	132.34	4.77028	4.77713	2959	48	7.99261
162-982B-14H-1-A 36	119.86	132.46	132.36	4.77062	4.7775	3326	27	8.10953
162-982B-14H-1-A 37	119.87	132.47	132.37	4.77079	4.77769	3288	55	8.09803
162-982B-14H-1-A 38	119.88	132.48	132.38	4.77096	4.77788	3396	36	8.13035
162-982B-14H-1-A 44	119.94	132.54	132.44	4.77198	4.77899	2401	27	7.78364
162-982B-14H-1-A 45.5	119.96	132.56	132.46	4.77232	4.77937	2534	41	7.83755
162-982B-14H-1-A 49	119.99	132.59	132.49	4.77283	4.77992	2318	54	7.74846
162-982B-14H-1-A 50	120	132.6	132.5	4.773	4.78011	2126	72	7.662
162-982B-14H-1-A 51	120.01	132.61	132.51	4.77317	4.7803	1983	55	7.59237
162-982B-14H-1-A 55	120.05	132.65	132.55	4.77386	4.78104	1921	53	7.5606
162-982B-14H-1-A 56	120.06	132.66	132.56	4.77403	4.78123	2091	16	7.6454
162-982B-14H-1-A 58	120.08	132.68	132.58	4.77437	4.7816	1961	42	7.58121
162-982B-14H-1-A 60	120.1	132.7	132.6	4.77471	4.78197	1896	30	7.5475
162-982B-14H-1-A 63	120.13	132.73	132.63	4.77522	4.78253	1617	38	7.38833
162-982B-14H-1-A 64	120.14	132.74	132.64	4.77539	4.78272	1411	63	7.25205
162-982B-14H-1-A 67	120.17	132.77	132.67	4.7759	4.78328	1414	51	7.25418
162-982B-14H-1-A 68	120.18	132.78	132.68	4.77607	4.78346	1438	50	7.27101
162-982B-14H-1-A 71	120.21	132.81	132.71	4.77658	4.78402	1521	39	7.32712
162-982B-14H-1-A 72	120.22	132.82	132.72	4.77675	4.78421	1470	35	7.29302
162-982B-14H-1-A 74	120.24	132.84	132.74	4.77709	4.78458	1418	78	7.257
162-982B-14H-1-A 75	120.25	132.85	132.75	4.77726	4.78477	1628	36	7.39511
162-982B-14H-1-A 78	120.28	132.88	132.78	4.77777	4.78532	1601	71	7.37838
162-982B-14H-1-A 79	120.29	132.89	132.79	4.77794	4.78551	1625	44	7.39326
162-982B-14H-1-A 83.5	120.34	132.94	132.84	4.77879	4.78644	1294	41	7.16549
162-982B-14H-1-A 88	120.38	132.98	132.88	4.77947	4.78719	1367	22	7.22037
162-982B-14H-1-A 89	120.39	132.99	132.89	4.77964	4.78737	1259	18	7.13807
162-982B-14H-1-A 90	120.4	133	132.9	4.77981	4.78756	1274	52	7.14992
162-982B-14H-1-A 92	120.42	133.02	132.92	4.78015	4.78793	1305	34	7.17396
162-982B-14H-1-A 94	120.44	133.04	132.94	4.78049	4.7883	1304	24	7.17319
162-982B-14H-1-A 96	120.46	133.06	132.96	4.78083	4.78868	1410	40	7.25134
162-982B-14H-1-A 97	120.47	133.07	132.97	4.781	4.78886	1506	43	7.31721
162-982B-14H-1-A 98	120.48	133.08	132.98	4.78117	4.78905	1326	68	7.18992
162-982B-14H-1-A 100	120.5	133.1	133	4.78151	4.78942	1472	62	7.29438
162-982B-14H-1-A 102	120.52	133.12	133.02	4.78185	4.78979	1321	44	7.18614
162-982B-14H-1-A 105	120.55	133.15	133.05	4.78236	4.79035	1191	78	7.08255
162-982B-14H-1-A 106	120.56	133.16	133.06	4.78253	4.79054	1371	70	7.2233
162-982B-14H-1-A 107	120.57	133.17	133.07	4.7827	4.79072	1324	47	7.18841
162-982B-14H-1-A 111	120.61	133.21	133.11	4.78338	4.79147	1233	50	7.11721
162-982B-14H-1-A 112	120.62	133.22	133.12	4.78355	4.79165	1440	55	7.2724
162-982B-14H-1-A 113	120.63	133.23	133.13	4.78372	4.79184	1182	58	7.07496
162-982B-14H-1-A 117	120.67	133.27	133.17	4.7844	4.79259	1437	8	7.27031
162-982B-14H-1-A 118	120.68	133.28	133.18	4.78457	4.79277	1379	52	7.22911
162-982B-14H-1-A 119	120.69	133.29	133.19	4.78474	4.79296	1424	60	7.26123
162-982B-14H-1-A 123.5	120.74	133.34	133.24	4.78559	4.79389	1307	66	7.17549
162-982B-14H-1-A 126	120.76	133.36	133.26	4.78593	4.79426	1683	65	7.42833
162-982B-14H-1-A 128	120.78	133.38	133.28	4.78627	4.79463	1787	44	7.48829
162-982B-14H-1-A 130	120.8	133.4	133.3	4.78661	4.79501	1477	52	7.29777
162-982B-14H-1-A 132	120.82	133.42	133.32	4.78695	4.79538	1382	30	7.23129
162-982B-14H-1-A 133	120.83	133.43	133.33	4.78712	4.79556	1191	57	7.08255
162-982B-14H-1-A 136.5	120.87	133.47	133.37	4.7878	4.79631	1832	30	7.51316
162-982B-14H-1-A 139	120.89	133.49	133.39	4.78814	4.79668	1455	22	7.28276
162-982B-14H-1-A 140	120.9	133.5	133.4	4.78831	4.79687	1278	63	7.15305
162-982B-14H-2-A 2	121.02	133.62	133.52	4.79035	4.7991	1431	45	7.26613
162-982B-14H-2-A 3	121.03	133.63	133.53	4.79052	4.79929		48
162-982B-14H-2-A 6	121.06	133.66	133.56	4.79103	4.79985	1147	27	7.04491
162-982B-14H-2-A 8	121.08	133.68	133.58	4.79137	4.80022	1195	47	7.0859
162-982B-14H-2-A 9	121.09	133.69	133.59	4.79154	4.80041	1189	43	7.08087
162-982B-14H-2-A 14	121.14	133.74	133.64	4.79239	4.80134	1369	37	7.22184
162-982B-14H-2-A 17	121.17	133.77	133.67	4.7929	4.8019	1233	25	7.11721
162-982B-14H-2-A 18	121.18	133.78	133.68	4.79307	4.80208	1316	20	7.18235
162-982B-14H-2-A 20	121.2	133.8	133.7	4.79341	4.80245	1416	43	7.25559
162-982B-14H-2-A 22	121.22	133.82	133.72	4.79375	4.80283	1496	20	7.31055
162-982B-14H-2-A 24	121.24	133.84	133.74	4.79409	4.8032	1394	47	7.23993
162-982B-14H-2-A 27	121.27	133.87	133.77	4.7946	4.80376	1365	79	7.21891
162-982B-14H-2-A 28	121.28	133.88	133.78	4.79477	4.80394	1412	44	7.25276
162-982B-14H-2-A 30	121.3	133.9	133.8	4.79511	4.80432	1538	89	7.33824
162-982B-14H-2-A 31	121.31	133.91	133.81	4.79529	4.8045	1393	66	7.23921
162-982B-14H-2-A 34	121.34	133.94	133.84	4.7958	4.80506	1556	53	7.34987
162-982B-14H-2-A 36	121.36	133.96	133.86	4.79614	4.80543	1265	37	7.14283
162-982B-14H-2-A 38	121.38	133.98	133.88	4.79648	4.80581	1393	10	7.23921
162-982B-14H-2-A 41	121.41	134.01	133.91	4.79699	4.80636	1394	36	7.23993
162-982B-14H-2-A 42	121.42	134.02	133.92	4.79716	4.80655	1259	25	7.13807
162-982B-14H-2-A 44	121.44	134.04	133.94	4.7975	4.80692	1385	65	7.23346
162-982B-14H-2-A 45	121.45	134.05	133.95	4.79767	4.80711	1324	77	7.18841
162-982B-14H-2-A 46	121.46	134.06	133.96	4.79784	4.80729	1254	54	7.13409
162-982B-14H-2-A 48	121.48	134.08	133.98	4.79818	4.80767	1377	34	7.22766
162-982B-14H-2-A 49	121.49	134.09	133.99	4.79835	4.80785	1434	44	7.26822
162-982B-14H-2-A 54	121.54	134.14	134.04	4.7992	4.80878	1591	40	7.37212
162-982B-14H-2-A 56	121.56	134.16	134.06	4.79954	4.80916	1387	52	7.2349
162-982B-14H-2-A 58	121.58	134.18	134.08	4.79988	4.80953	1417	56	7.2563
162-982B-14H-2-A 60	121.6	134.2	134.1	4.80022	4.8099	1587	72	7.3696
162-982B-14H-2-A 62	121.62	134.22	134.12	4.80056	4.81027	1592	52	7.37275
162-982B-14H-2-A 65	121.65	134.25	134.15	4.80107	4.81083	1763	68	7.47477
162-982B-14H-2-A 66	121.66	134.26	134.16	4.80124	4.81102	1758	38	7.47193
162-982B-14H-2-A 67	121.67	134.27	134.17	4.80141	4.81121	1446	52	7.27656
162-982B-14H-2-A 70	121.7	134.3	134.2	4.80192	4.81176	1549	73	7.34536
162-982B-14H-2-A 72	121.72	134.32	134.22	4.80226	4.81214	1714	47	7.44659
162-982B-14H-2-A 74	121.74	134.34	134.24	4.8026	4.81251	1658	2	7.41337
162-982B-14H-2-A 77.5	121.78	134.38	134.28	4.80328	4.81325	1786	64	7.48773
162-982B-14H-2-A 80	121.8	134.4	134.3	4.80362	4.81363	1577	58	7.36328
162-982B-14H-2-A 82	121.82	134.42	134.32	4.80396	4.814	1643	42	7.40428
162-982B-14H-2-A 85	121.85	134.45	134.35	4.80447	4.81456	1899	41	7.54908
162-982B-14H-2-A 86	121.86	134.46	134.36	4.80464	4.81474	1508	29	7.31854
162-982B-14H-2-A 88	121.88	134.48	134.38	4.80498	4.81512	1695	8	7.43544
162-982B-14H-2-A 94	121.94	134.54	134.44	4.806	4.81623	1761	13	7.47364
162-982B-14H-2-A 95	121.95	134.55	134.45	4.80617	4.81642	1750	28	7.46737
162-982B-14H-2-A 98	121.98	134.58	134.48	4.80668	4.81698	1897	9	7.54803
162-982B-14H-2-A 99	121.99	134.59	134.49	4.80685	4.81716	1828	42	7.51098
162-982B-14H-2-A 102	122.02	134.62	134.52	4.80736	4.81772	1728	86	7.45472
162-982B-14H-2-A 104	122.04	134.64	134.54	4.8077	4.81809	1660	58	7.41457
162-982B-14H-2-A 105	122.05	134.65	134.55	4.80787	4.81828	1911	62	7.55538
162-982B-14H-2-A 108	122.08	134.68	134.58	4.80838	4.81884	1882	38	7.54009
162-982B-14H-2-A 110	122.1	134.7	134.6	4.80872	4.81921	1763	61	7.47477
162-982B-14H-2-A 112	122.12	134.72	134.62	4.80906	4.81958	1806	72	7.49887
162-982B-14H-2-A 115	122.15	134.75	134.65	4.80957	4.82014	1814	27	7.50329
162-982B-14H-2-A 116	122.16	134.76	134.66	4.80974	4.82033	1692	39	7.43367
162-982B-14H-2-A 118	122.18	134.78	134.68	4.81008	4.8207	1718	72	7.44892
162-982B-14H-2-A 119	122.19	134.79	134.69	4.81025	4.82089	1623	93	7.39203
162-982B-14H-2-A 122	122.22	134.82	134.72	4.81076	4.82145	1568	24	7.35756
162-982B-14H-2-A 124	122.24	134.84	134.74	4.8111	4.82182	1587	32	7.3696
162-982B-14H-2-A 127	122.27	134.87	134.77	4.81161	4.82238	1631	32	7.39695
162-982B-14H-2-A 129	122.29	134.89	134.79	4.81195	4.82275	1459	16	7.28551
162-982B-14H-2-A 133.5	122.34	134.94	134.84	4.8128	4.82368	1699	-22	7.4378
162-982B-14H-2-A 136	122.36	134.96	134.86	4.81314	4.82405	1460	26	7.28619
162-982B-14H-2-A 138	122.38	134.98	134.88	4.81348	4.82442	1452	19	7.2807
162-982B-14H-2-A 139	122.39	134.99	134.89	4.81365	4.82461	1812	82	7.50219
162-982B-14H-2-A 142	122.42	135.02	134.92	4.81416	4.82517	1675	38	7.42357
162-982B-14H-2-A 143	122.43	135.03	134.93	4.81433	4.82536	1520	36	7.32647
162-982B-14H-3-A 3	122.53	135.13	135.03	4.81603	4.82722	1835	76	7.5148
162-982B-14H-3-A 4	122.54	135.14	135.04	4.8162	4.8274	1474	72	7.29574
162-982B-14H-3-A 9	122.59	135.19	135.09	4.81706	4.82833	1378	54	7.22839
162-982B-14H-3-A 10	122.6	135.2	135.1	4.81723	4.82852	1466	41	7.29029
162-982B-14H-3-A 13	122.63	135.23	135.13	4.81774	4.82908	1094	19	6.9976
162-982B-14H-3-A 14	122.64	135.24	135.14	4.81791	4.82927	1343	46	7.20266
162-982B-14H-3-A 15	122.65	135.25	135.15	4.81808	4.82945	1375	94	7.22621
162-982B-14H-3-A 18	122.68	135.28	135.18	4.81859	4.83001	1449	16	7.27863
162-982B-14H-3-A 19	122.69	135.29	135.19	4.81876	4.8302	1245	41	7.12689
162-982B-14H-3-A 24	122.74	135.34	135.24	4.81961	4.83113	1286	10	7.15929
162-982B-14H-3-A 25	122.75	135.35	135.25	4.81978	4.83131	1379	64	7.22911
162-982B-14H-3-A 27	122.77	135.37	135.27	4.82012	4.83169	1320	66	7.18539
162-982B-14H-3-A 30	122.8	135.4	135.3	4.82063	4.83224	1461	55	7.28688
162-982B-14H-3-A 31	122.81	135.41	135.31	4.8208	4.83243	1412	74	7.25276
162-982B-14H-3-A 34	122.84	135.44	135.34	4.82131	4.83299	1475	19	7.29641
162-982B-14H-3-A 37	122.87	135.47	135.37	4.82182	4.83355	1588	61	7.37023
162-982B-14H-3-A 38	122.88	135.48	135.38	4.82199	4.83373	1641	68	7.40306
162-982B-14H-3-A 40	122.9	135.5	135.4	4.82233	4.83411	1881	55	7.53956
162-982B-14H-3-A 43	122.93	135.53	135.43	4.82284	4.83467	1369	58	7.22184
162-982B-14H-3-A 44	122.94	135.54	135.44	4.82301	4.83485	1560	49	7.35244
162-982B-14H-3-A 46	122.96	135.56	135.46	4.82335	4.83522	1676	34	7.42417
162-982B-14H-3-A 47	122.97	135.57	135.47	4.82352	4.83541	1677	50	7.42476
162-982B-14H-3-A 51	123.01	135.61	135.51	4.8242	4.83615	1670	30	7.42058
162-982B-14H-3-A 52	123.02	135.62	135.52	4.82437	4.83634	1851	89	7.52348
162-982B-14H-3-A 55	123.05	135.65	135.55	4.82488	4.8369	1616	41	7.38771
162-982B-14H-3-A 56	123.06	135.66	135.56	4.82505	4.83709	1872	60	7.53476
162-982B-14H-3-A 58	123.08	135.68	135.58	4.82539	4.83746	1648	59	7.40732
162-982B-14H-3-A 63	123.13	135.73	135.63	4.82624	4.83839	1940	66	7.57044
162-982B-14H-3-A 64	123.14	135.74	135.64	4.82641	4.83858	1690	72	7.43248
162-982B-14H-3-A 68.5	123.19	135.79	135.69	4.82726	4.83951	1689	62	7.43189
162-982B-14H-3-A 71	123.21	135.81	135.71	4.8276	4.83988	1474	37	7.29574
162-982B-14H-3-A 72	123.22	135.82	135.72	4.82777	4.84006	1572	66	7.3601
162-982B-14H-3-A 73	123.23	135.83	135.73	4.82794	4.84025	1856	50	7.52618
162-982B-14H-3-A 77.5	123.28	135.88	135.78	4.82879	4.84118	1698	29	7.43721
162-982B-14H-3-A 80	123.3	135.9	135.8	4.82913	4.84155	1624	40	7.39265
162-982B-14H-3-A 81	123.31	135.91	135.81	4.8293	4.84174	1705	52	7.44132
162-982B-14H-3-A 83.5	123.34	135.94	135.84	4.82981	4.8423	1593	42	7.37337
162-982B-14H-3-A 86	123.36	135.96	135.86	4.83015	4.84267	1618	22	7.38895
162-982B-14H-3-A 88	123.38	135.98	135.88	4.83049	4.84304	1601	70	7.37838
162-982B-14H-3-A 89	123.39	135.99	135.89	4.83066	4.84323	1560	51	7.35244
162-982B-14H-3-A 92	123.42	136.02	135.92	4.83117	4.84379	1746	47	7.46508
162-982B-14H-3-A 94	123.44	136.04	135.94	4.83151	4.84416	1660	51	7.41457
162-982B-14H-3-A 97	123.47	136.07	135.97	4.83202	4.84472	1722	36	7.45124
162-982B-14H-3-A 98	123.48	136.08	135.98	4.83219	4.84491	1747	76	7.46566
162-982B-14H-3-A 103	123.53	136.13	136.03	4.83304	4.84584	1931	50	7.56579
162-982B-14H-3-A 104	123.54	136.14	136.04	4.83321	4.84602	1810	55	7.50108
162-982B-14H-3-A 106	123.56	136.16	136.06	4.83355	4.8464	1836	10	7.51534
162-982B-14H-3-A 108	123.58	136.18	136.08	4.83389	4.84677	1705	61	7.44132
162-982B-14H-3-A 109	123.59	136.19	136.09	4.83406	4.84695	1804	33	7.49776
162-982B-14H-3-A 112	123.62	136.22	136.12	4.83457	4.84751	1860	47	7.52833
162-982B-14H-3-A 114.5	123.65	136.25	136.15	4.83508	4.84807	1837	46	7.51589
162-982B-14H-3-A 115.5	123.66	136.26	136.16	4.83525	4.84826	1755	55	7.47022
162-982B-14H-3-A 118	123.68	136.28	136.18	4.83559	4.84863	1820	42	7.50659
162-982B-14H-3-A 120	123.7	136.3	136.2	4.83593	4.849	1549	45	7.34536
162-982B-14H-3-A 123	123.73	136.33	136.23	4.83644	4.84956	1969	22	7.58528
162-982B-14H-3-A 124	123.74	136.34	136.24	4.83661	4.84975	1751	62	7.46794
162-982B-14H-3-A 128	123.78	136.38	136.28	4.83729	4.85049	1835	26	7.5148
162-982B-14H-3-A 130	123.8	136.4	136.3	4.83763	4.85086	1860	30	7.52833
162-982B-14H-3-A 132	123.82	136.42	136.32	4.83797	4.85124	1863	32	7.52994
162-982B-14H-3-A 135	123.85	136.45	136.35	4.83849	4.85179	2060	38	7.63046
162-982B-14H-3-A 136	123.86	136.46	136.36	4.83866	4.85198	2039	78	7.62021
162-982B-14H-3-A 138	123.88	136.48	136.38	4.839	4.85235	1939	44	7.56993
162-982B-14H-3-A 139	123.89	136.49	136.39	4.83917	4.85254	2159	107	7.6774
162-982B-14H-3-A 143	123.93	136.53	136.43	4.83985	4.85328	2089	38	7.64444
162-982B-14H-3-A 144	123.94	136.54	136.44	4.84002	4.85347	2146	82	7.67136
162-982B-14H-3-A 146	123.96	136.56	136.46	4.84036	4.85384	2326	77	7.75191
162-982B-14H-3-A 148	123.98	136.58	136.48	4.8407	4.85422	2017	8	7.60937
162-982B-14H-3-A 149	123.99	136.59	136.49	4.84087	4.8544	2036	56	7.61874
162-982B-14H-4-A 2	124.02	136.62	136.52	4.84138	4.85496	2059	45	7.62998
162-982B-14H-4-A 3	124.03	136.63	136.53	4.84155	4.85515	1900	17	7.54961
162-982B-14H-4-A 7	124.07	136.67	136.57	4.84223	4.85589	2100	32	7.64969
162-982B-14H-4-A 8	124.08	136.68	136.58	4.8424	4.85608	2116	64	7.65728
162-982B-14H-4-A 10	124.1	136.7	136.6	4.84274	4.85645	2065	38	7.63289
162-982B-14H-4-A 11.5	124.12	136.72	136.62	4.84308	4.85682	1882	36	7.54009
162-982B-14H-4-A 14	124.14	136.74	136.64	4.84342	4.85719	2089	77	7.64444
162-982B-14H-4-A 18	124.18	136.78	136.68	4.8441	4.85794	1460	41	7.28619
162-982B-14H-4-A 20	124.2	136.8	136.7	4.84444	4.85831	1962	69	7.58172
162-982B-14H-4-A 21	124.21	136.81	136.71	4.84461	4.8585	1764	40	7.47534
162-982B-14H-4-A 24	124.24	136.84	136.74	4.84512	4.85906	1915	95	7.55747
162-982B-14H-4-A 28	124.28	136.88	136.78	4.8458	4.8598	2092	54	7.64588
162-982B-14H-4-A 35	124.35	136.95	136.85	4.84699	4.8611	1912	28	7.55591
162-982B-14H-4-A 36	124.36	136.96	136.86	4.84716	4.86129	1626	38	7.39388
162-982B-14H-4-A 38	124.38	136.98	136.88	4.8475	4.86166	1439	58	7.2717
162-982B-14H-4-A 40	124.4	137	136.9	4.84784	4.86204	1401	72	7.24494
162-982B-14H-4-A 41	124.41	137.01	136.91	4.84801	4.86222	1583	38	7.36708
162-982B-14H-4-A 42	124.42	137.02	136.92	4.84818	4.86241	1555	68	7.34923
162-982B-14H-4-A 43	124.43	137.03	136.93	4.84835	4.86259	1636	67	7.40001
162-982B-14H-4-A 46	124.46	137.06	136.96	4.84886	4.86315	1515	50	7.32317
162-982B-14H-4-A 50	124.5	137.1	137	4.84954	4.8639	1652	70	7.40974
162-982B-14H-4-A 51	124.51	137.11	137.01	4.84971	4.86408	1486	36	7.30384
162-982B-14H-4-A 52	124.52	137.12	137.02	4.84988	4.86427	1510	52	7.31986
162-982B-14H-4-A 56	124.56	137.16	137.06	4.85056	4.86501	1563	55	7.35436
162-982B-14H-4-A 58	124.58	137.18	137.08	4.8509	4.86539	1182	69	7.07496
162-982B-14H-4-A 61	124.61	137.21	137.11	4.85141	4.86595	1492	51	7.30787
162-982B-14H-4-A 62	124.62	137.22	137.12	4.85158	4.86613	1468	38	7.29166
162-982B-14H-4-A 64	124.64	137.24	137.14	4.85192	4.8665	1469	38	7.29234
162-982B-14H-4-A 65	124.65	137.25	137.15	4.85209	4.86669	1324	39	7.18841
162-982B-14H-4-A 68	124.68	137.28	137.18	4.8526	4.86725	1254	18	7.13409
162-982B-14H-4-A 73	124.73	137.33	137.23	4.85345	4.86818	1538	36	7.33824
162-982B-14H-4-A 74	124.74	137.34	137.24	4.85362	4.86837	1504	77	7.31588
162-982B-14H-4-A 75	124.75	137.35	137.25	4.85379	4.86855	1366	36	7.21964
162-982B-14H-4-A 78	124.78	137.38	137.28	4.8543	4.86911	1760	68	7.47307
162-982B-14H-4-A 81	124.81	137.41	137.31	4.85481	4.86967	1551	43	7.34666
162-982B-14H-4-A 82	124.82	137.42	137.32	4.85498	4.86986	1587	48	7.3696
162-982B-14H-4-A 83.5	124.84	137.44	137.34	4.85532	4.87023	1601	83	7.37838
162-982B-14H-4-A 86	124.86	137.46	137.36	4.85566	4.8706	1826	46	7.50988
162-982B-14H-4-A 88	124.88	137.48	137.38	4.856	4.87097	1653	47	7.41035
162-982B-14H-4-A 91	124.91	137.51	137.41	4.85651	4.87153	1559	47	7.3518
162-982B-14H-4-A 92	124.92	137.52	137.42	4.85668	4.87172	1510	58	7.31986
162-982B-14H-4-A 95	124.95	137.55	137.45	4.85719	4.87228	1487	66	7.30452
162-982B-14H-4-A 96	124.96	137.56	137.46	4.85736	4.87246	1589	73	7.37086
162-982B-14H-4-A 99	124.99	137.59	137.49	4.85787	4.87302	1373	66	7.22475
162-982B-14H-4-A 100	125	137.6	137.5	4.85804	4.87321	1349	65	7.20712
162-982B-14H-4-A 102	125.02	137.62	137.52	4.85838	4.87358	1387	36	7.2349
162-982B-14H-4-A 103	125.03	137.63	137.53	4.85855	4.87377	1429	78	7.26473
162-982B-14H-4-A 105.5	125.06	137.66	137.56	4.85906	4.87432	1558	51	7.35116
162-982B-14H-4-A 108	125.08	137.68	137.58	4.8594	4.8747	1494	50	7.30921
162-982B-14H-4-A 113	125.13	137.73	137.63	4.86026	4.87563	1471	42	7.2937
162-982B-14H-4-A 118	125.18	137.78	137.68	4.86111	4.87636	1455	75	7.28276
162-982B-14H-4-A 119	125.19	137.79	137.69	4.86128	4.87648	1718	39	7.44892
162-982B-14H-4-A 122	125.22	137.82	137.72	4.86179	4.87685	1578	55	7.36391
162-982B-14H-4-A 125	125.25	137.85	137.75	4.8623	4.87721	1541	50	7.34019
162-982B-14H-4-A 126	125.26	137.86	137.76	4.86247	4.87733	1650	72	7.40853
162-982B-14H-4-A 127	125.27	137.87	137.77	4.86264	4.87745	1840	47	7.51752
162-982B-14H-4-A 130	125.3	137.9	137.8	4.86315	4.87782	1960	73	7.5807
162-982B-14H-4-A 132	125.32	137.92	137.82	4.86349	4.87806	1862	78	7.52941
162-982B-14H-4-A 135	125.35	137.95	137.85	4.864	4.87842	1843	72	7.51915
162-982B-14H-4-A 136	125.36	137.96	137.86	4.86417	4.87854	2051	58	7.62608
162-982B-14H-4-A 138.5	125.39	137.99	137.89	4.86468	4.8789	1852	38	7.52402
162-982B-14H-4-A 141	125.41	138.01	137.91	4.86502	4.87915	1847	66	7.52132
162-982B-14H-4-A 142	125.42	138.02	137.92	4.86519	4.87927	1514	52	7.32251
162-982B-14H-4-A 144	125.44	138.04	137.94	4.86553	4.87951	1404	19	7.24708
162-982B-14H-4-A 146	125.46	138.06	137.96	4.86587	4.87975	1235	70	7.11883
162-982B-14H-5-A 4.5	125.55	138.15	138.05	4.8674	4.88084	1641	22	7.40306
162-982B-14H-5-A 6	125.56	138.16	138.06	4.86757	4.88096	1525	66	7.32975
162-982B-14H-5-A 11	125.61	138.21	138.11	4.86842	4.88157	1648	77	7.40732
162-982B-14H-5-A 12	125.62	138.22	138.12	4.86859	4.88169	1627	28	7.39449
162-982B-14H-5-A 13	125.63	138.23	138.13	4.86876	4.88181	1538	73	7.33824
162-982B-14H-5-A 15.5	125.66	138.26	138.16	4.86927	4.88217	1646	76	7.4061
162-982B-14H-5-A 19	125.69	138.29	138.19	4.86978	4.88254	1525	49	7.32975
162-982B-14H-5-A 20	125.7	138.3	138.2	4.86995	4.88266	1389	39	7.23634
162-982B-14H-5-A 22	125.72	138.32	138.22	4.87029	4.8829	1525	30	7.32975
162-982B-14H-5-A 23	125.73	138.33	138.23	4.87046	4.88302	1564	36	7.355
162-982B-14H-5-A 25	125.75	138.35	138.25	4.8708	4.88326	1805	72	7.49832
162-982B-14H-5-A 27	125.77	138.37	138.27	4.87114	4.8835	1566	27	7.35628
162-982B-14H-5-A 30	125.8	138.4	138.3	4.87165	4.88387	1499	36	7.31255
162-982B-14H-5-A 31	125.81	138.41	138.31	4.87182	4.88399	1698	19	7.43721
162-982B-14H-5-A 34	125.84	138.44	138.34	4.87233	4.88435	1386	-1	7.23418
162-982B-14H-5-A 38	125.88	138.48	138.38	4.87301	4.88483	1544	22	7.34213
162-982B-14H-5-A 43	125.93	138.53	138.43	4.87386	4.88544	1582	41	7.36645
162-982B-14H-5-A 44	125.94	138.54	138.44	4.87403	4.88556	1438	99	7.27101
162-982B-14H-5-A 46.5	125.97	138.57	138.47	4.87454	4.88592	1476	22	7.29709
162-982B-14H-5-A 49	125.99	138.59	138.49	4.87488	4.88617	1546	93	7.34343
162-982B-14H-5-A 51	126.01	138.61	138.51	4.87522	4.88641	1488	35	7.30519
162-982B-14H-5-A 52	126.02	138.62	138.52	4.87539	4.88653	1336	59	7.19744
162-982B-14H-5-A 53	126.03	138.63	138.53	4.87556	4.88665	1340	12	7.20042
162-982B-14H-5-A 56	126.06	138.66	138.56	4.87607	4.88701	1303	72	7.17242
162-982B-14H-5-A 58	126.08	138.68	138.58	4.87641	4.88725	1241	14	7.12367
162-982B-14H-5-A 61	126.11	138.71	138.61	4.87692	4.88762	1452	4	7.2807
162-982B-14H-5-A 62	126.12	138.72	138.62	4.87709	4.88774	1686	58	7.43011
162-982B-14H-5-A 64	126.14	138.74	138.64	4.87743	4.88798	1441	62	7.27309
162-982B-14H-5-A 65	126.15	138.75	138.65	4.8776	4.8881	1537	40	7.33759
162-982B-14H-5-A 66	126.16	138.76	138.66	4.87777	4.88822	1625	42	7.39326
162-982B-14H-5-A 68	126.18	138.78	138.68	4.87811	4.88846	1757	40	7.47136
162-982B-14H-5-A 71	126.21	138.81	138.71	4.87862	4.88883	1896	62	7.5475
162-982B-14H-5-A 72	126.22	138.82	138.72	4.87879	4.88895	1982	74	7.59186
162-982B-14H-5-A 73	126.23	138.83	138.73	4.87896	4.88907	1776	58	7.48212
162-982B-14H-5-A 76	126.26	138.86	138.76	4.87947	4.88943	1829	44	7.51152
162-982B-14H-5-A 77	126.27	138.87	138.77	4.87964	4.88955	1738	45	7.46049
162-982B-14H-5-A 79	126.29	138.89	138.79	4.87998	4.8898	2051	15	7.62608
162-982B-14H-5-A 83.5	126.34	138.94	138.84	4.88083	4.8904	2344	58	7.75961
162-982B-14H-5-A 86	126.36	138.96	138.86	4.88117	4.89064	2501	43	7.82445
162-982B-14H-5-A 88.5	126.39	138.99	138.89	4.88169	4.89101	2859	5	7.95823
162-982B-14H-5-A 89.5	126.4	139	138.9	4.88186	4.89113	2275	9	7.72974
162-982B-14H-5-A 92	126.42	139.02	138.92	4.8822	4.89137	2145	42	7.67089
162-982B-14H-5-A 93	126.43	139.03	138.93	4.88237	4.89149	2084	55	7.64204
162-982B-14H-5-A 98	126.48	139.08	138.98	4.88322	4.8921	1964	110	7.58274
162-982B-14H-5-A 100	126.5	139.1	139	4.88356	4.89234	2040	63	7.62071
162-982B-14H-5-A 102	126.52	139.12	139.02	4.8839	4.89258	1978	65	7.58984
162-982B-14H-5-A 104.5	126.55	139.15	139.05	4.88441	4.89294	2039	67	7.62021
162-982B-14H-5-A 106.5	126.57	139.17	139.07	4.88475	4.89318	1914	67	7.55695
162-982B-14H-5-A 108	126.58	139.18	139.08	4.88492	4.89331	1958	58	7.57968
162-982B-14H-5-A 110.5	126.61	139.21	139.11	4.88543	4.89367	2028	38	7.61481
162-982B-14H-5-A 111.5	126.62	139.22	139.12	4.8856	4.89379	1904	67	7.55171
162-982B-14H-5-A 114	126.64	139.24	139.14	4.88594	4.89403	1991	53	7.59639
162-982B-14H-5-A 116	126.66	139.26	139.16	4.88628	4.89427	2023	72	7.61234
162-982B-14H-5-A 119	126.69	139.29	139.19	4.88679	4.89464	1947	50	7.57405
162-982B-14H-5-A 123.5	126.74	139.34	139.24	4.88764	4.89524	2159	1	7.6774
162-982B-14H-5-A 126	126.76	139.36	139.26	4.88798	4.89548	2215	37	7.70301
162-982B-14H-5-A 128	126.78	139.38	139.28	4.88832	4.89573	2392	81	7.77989
162-982B-14H-5-A 129	126.79	139.39	139.29	4.88849	4.89585	2566	74	7.8501
162-982B-14H-5-A 130	126.8	139.4	139.3	4.88866	4.89597	2550	49	7.84385
162-982B-14H-5-A 131	126.81	139.41	139.31	4.88883	4.89609	2903	41	7.9735
162-982B-14H-5-A 133.5	126.84	139.44	139.34	4.88934	4.89645	2652	74	7.88307
162-982B-14H-5-A 136	126.86	139.46	139.36	4.88968	4.89669	3075	42	8.03106
162-982B-14H-5-A 139	126.89	139.49	139.39	4.89019	4.89706	2823	52	7.94556
162-982B-14H-5-A 140	126.9	139.5	139.4	4.89036	4.89718	2772	41	7.92732
162-982B-14H-5-A 143	126.93	139.53	139.43	4.89087	4.89754	3090	47	8.03593
162-982B-14H-5-A 144	126.94	139.54	139.44	4.89104	4.89766	2923	80	7.98037
162-982B-14H-5-A 148	126.98	139.58	139.48	4.89172	4.89815	2900	80	7.97247
162-982B-14H-5-A 149	126.99	139.59	139.49	4.89189	4.89827	3061	59	8.0265
162-982B-14H-6-A 2	127.02	139.62	139.52	4.8924	4.89863	2719	44	7.90802
162-982B-14H-6-A 3	127.03	139.63	139.53	4.89257	4.89875	3126	58	8.04751
162-982B-14H-6-A 5.5	127.06	139.66	139.56	4.89308	4.89911	2790	56	7.9338
162-982B-14H-6-A 8	127.08	139.68	139.58	4.89342	4.89936	2954	60	7.99092
162-982B-14H-6-A 9	127.09	139.69	139.59	4.89359	4.89948	2908	105	7.97522
162-982B-14H-6-A 14	127.14	139.74	139.64	4.89444	4.90008	2798	58	7.93666
162-982B-14H-6-A 15	127.15	139.75	139.65	4.89461	4.9002	2563	73	7.84893
162-982B-14H-6-A 18	127.18	139.78	139.68	4.89512	4.90057	2893	42	7.97005
162-982B-14H-6-A 19	127.19	139.79	139.69	4.89529	4.90069	2735	90	7.91389
162-982B-14H-6-A 22	127.22	139.82	139.72	4.8958	4.90105	2619	78	7.87055
162-982B-14H-6-A 25.5	127.26	139.86	139.76	4.89648	4.90154	2339	22	7.75748
162-982B-14H-6-A 27	127.27	139.87	139.77	4.89665	4.90166	2446	16	7.80221
162-982B-14H-6-A 30	127.3	139.9	139.8	4.89716	4.90202	2612	56	7.86787
162-982B-14H-6-A 32	127.32	139.92	139.82	4.8975	4.90226	2330	46	7.75362
162-982B-14H-6-A 33	127.33	139.93	139.83	4.89767	4.90238	2412	68	7.78821
162-982B-14H-6-A 38	127.38	139.98	139.88	4.89852	4.90299	2271	71	7.72798
162-982B-14H-6-A 39	127.39	139.99	139.89	4.89869	4.90311	2350	61	7.76217
162-982B-14H-6-A 42	127.42	140.02	139.92	4.8992	4.90347	2250	71	7.71869
162-982B-14H-6-A 43	127.43	140.03	139.93	4.89937	4.90359	2431	49	7.79606
162-982B-14H-6-A 45.5	127.46	140.06	139.96	4.89988	4.90396	2242	82	7.71512
162-982B-14H-6-A 48	127.48	140.08	139.98	4.90022	4.9042	2318	56	7.74846
162-982B-14H-6-A 53	127.53	140.13	140.03	4.90107	4.9048	2034	13	7.61776
162-982B-14H-6-A 54	127.54	140.14	140.04	4.90124	4.90492	2284	57	7.73368
162-982B-14H-6-A 55	127.55	140.15	140.05	4.90141	4.90504	2025	39	7.61332
162-982B-14H-6-A 56	127.56	140.16	140.06	4.90158	4.90517	2138	58	7.66763
162-982B-14H-6-A 58	127.58	140.18	140.08	4.90192	4.90541	2167	74	7.6811
162-982B-14H-6-A 60	127.6	140.2	140.1	4.90226	4.90565	1696	30	7.43603
162-982B-14H-6-A 62	127.62	140.22	140.12	4.9026	4.90589	1695	58	7.43544
162-982B-14H-6-A 64	127.64	140.24	140.14	4.90294	4.90613	1787	59	7.48829
162-982B-14H-6-A 67	127.67	140.27	140.17	4.90346	4.9065	1903	59	7.55119
162-982B-14H-6-A 70	127.7	140.3	140.2	4.90397	4.90686	1899	24	7.54908
162-982B-14H-6-A 72.5	127.73	140.33	140.23	4.90448	4.90722	1960	64	7.5807
162-982B-14H-6-A 76	127.76	140.36	140.26	4.90499	4.90759	1434	45	7.26822
162-982B-14H-6-A 78	127.78	140.38	140.28	4.90533	4.90783	1846	41	7.52078
162-982B-14H-6-A 80	127.8	140.4	140.3	4.90567	4.90807	1325	44	7.18917
162-982B-14H-6-A 82	127.82	140.42	140.32	4.90601	4.90831	1377	57	7.22766
162-982B-14H-6-A 84	127.84	140.44	140.34	4.90635	4.90855	1327	5	7.19068
162-982B-14H-6-A 86	127.86	140.46	140.36	4.90669	4.9088	1250	64	7.1309
162-982B-14H-6-A 87	127.87	140.47	140.37	4.90686	4.90892	1439	62	7.2717
162-982B-14H-6-A 89	127.89	140.49	140.39	4.9072	4.90916	1447	74	7.27725
162-982B-14H-6-A 94	127.94	140.54	140.44	4.90805	4.90976	1539	51	7.33889
162-982B-14H-6-A 96	127.96	140.56	140.46	4.90839	4.91001	1433	47	7.26753
162-982B-14H-6-A 98	127.98	140.58	140.48	4.90873	4.91025	1384	77	7.23273
162-982B-14H-6-A 100	128	140.6	140.5	4.90907	4.91049	1325	32	7.18917
162-982B-14H-6-A 102	128.02	140.62	140.52	4.90941	4.91073	1520	22	7.32647
162-982B-14H-6-A 104	128.04	140.64	140.54	4.90975	4.91097	1237	80	7.12044
162-982B-14H-6-A 105	128.05	140.65	140.55	4.90992	4.9111	1484	56	7.3025
162-982B-14H-6-A 107.5	128.08	140.68	140.58	4.91043	4.91146	1851	50	7.52348
162-982B-14H-7-A 2	128.12	140.72	140.62	4.91111	4.91194	1688	55	7.4313
162-982B-14H-7-A 4	128.14	140.74	140.64	4.91145	4.91218	1538	76	7.33824
162-982B-14H-7-A 6	128.16	140.76	140.66	4.91179	4.91243	1852	36	7.52402
162-982B-14H-7-A 8	128.18	140.78	140.68	4.91213	4.91267	1773	61	7.48043
162-982B-14H-7-A 9	128.19	140.79	140.69	4.9123	4.91279	1849	82	7.5224
162-982B-14H-7-A 12	128.22	140.82	140.72	4.91281	4.91315	1587	92	7.3696
162-982B-14H-7-A 14	128.24	140.84	140.74	4.91315	4.91339	1780	106	7.48437
162-982B-14H-7-A 15	128.25	140.85	140.75	4.91332	4.91352	2030	75	7.61579
162-982B-14H-7-A 16	128.26	140.86	140.76	4.91349	4.91364	2059	80	7.62998
162-982B-14H-7-A 18	128.28	140.88	140.78	4.91383	4.91388	2351	92	7.7626
162-982B-14H-7-A 20.5	128.31	140.91	140.81	4.91433	4.9143	2248	159	7.7178
162-982B-14H-7-A 26	128.36	140.96	140.86	4.91517	4.91505	2326	80	7.75191
162-982B-14H-7-A 29	128.39	140.99	140.89	4.91567	4.9155	2197	91	7.69485
162-982B-14H-7-A 30	128.4	141	140.9	4.91584	4.91565	2407	117	7.78614
162-982B-14H-7-A 32	128.42	141.02	140.92	4.91618	4.91595	2377	74	7.77359
162-982B-14H-7-A 34	128.44	141.04	140.94	4.91651	4.91626	2672	68	7.89058
162-982B-14H-7-A 35	128.45	141.05	140.95	4.91668	4.91641	2671	64	7.89021
162-982B-14H-7-A 36	128.46	141.06	140.96	4.91685	4.91656	2527	56	7.83479
162-982B-14H-7-A 37.5	128.48	141.08	140.98	4.91718	4.91686	2605	140	7.86519
162-982B-14H-7-A 40	128.5	141.1	141	4.91752	4.91716	2771	151	7.92696
162-982B-14H-7-A 42	128.52	141.12	141.02	4.91785	4.91746	3090	89	8.03593
162-982B-14H-7-A 45	128.55	141.15	141.05	4.91835	4.91791	2376	60	7.77317
162-982B-14H-7-A 46	128.56	141.16	141.06	4.91852	4.91806	2772	133	7.92732
162-982B-14H-7-A 48	128.58	141.18	141.08	4.91886	4.91836	3012	108	8.01036
162-982B-14H-7-A 50	128.6	141.2	141.1	4.91919	4.91866	2718	104	7.90765
162-982B-14H-7-A 53	128.63	141.23	141.13	4.91969	4.91911	3316	131	8.10651
162-982B-14H-7-A 54	128.64	141.24	141.14	4.91986	4.91926	3521	140	8.1665
162-982B-14H-7-A 56	128.66	141.26	141.16	4.9202	4.91956	3596	108	8.18758
162-982B-14H-7-A 59	128.69	141.29	141.19	4.9207	4.92002	3406	126	8.13329
162-982B-14H-7-A 60	128.7	141.3	141.2	4.92087	4.92017	3540	166	8.17188
162-982B-14H-7-A 66	128.76	141.36	141.26	4.92187	4.92107	3607	156	8.19063
162-982B-14H-7-A 68	128.78	141.38	141.28	4.9222	4.92137	3927	187	8.27563
162-982B-14H-7-A 70	128.8	141.4	141.3	4.92254	4.92167	4040	126	8.304
162-982B-14H-7-A 71	128.81	141.41	141.31	4.92271	4.92182	3576	134	8.182
162-982B-14H-7-A 74	128.84	141.44	141.34	4.92321	4.92227	4591	197	8.43185
162-982B-14H-7-A 75	128.85	141.45	141.35	4.92338	4.92242	4491	169	8.40983
162-982B-14H-7-A 76	128.86	141.46	141.36	4.92354	4.92257	5037	170	8.52457
162-982B-14H-7-A 78	128.88	141.48	141.38	4.92388	4.92287	5751	218	8.65713
162-982B-14H-7-A 80	128.9	141.5	141.4	4.92421	4.92317	5867	74	8.6771
162-982B-14H-7-A 83	128.93	141.53	141.43	4.92472	4.92362	6592	70	8.79361
162-982B-14H-7-A 86	128.96	141.56	141.46	4.92522	4.92408	2672	68	7.89058
162-982B-14H-7-A 88	128.98	141.58	141.48	4.92555	4.92438	5733	66	8.65399
162-982B-15H-1-A 3	129.03	143.09	142.73	4.94648	4.94317	2172	66	7.6834
162-982B-15H-1-A 4	129.04	143.1	142.74	4.94665	4.94332	2268	62	7.72665
162-982B-15H-1-A 6	129.06	143.12	142.76	4.94699	4.94362	2254	61	7.72046
162-982B-15H-1-A 9	129.09	143.15	142.79	4.94749	4.94408	2003	83	7.6024
162-982B-15H-1-A 10	129.1	143.16	142.8	4.94766	4.94423	2641	55	7.87891
162-982B-15H-1-A 12	129.12	143.18	142.82	4.94799	4.94453	2482	17	7.81682
162-982B-15H-1-A 15	129.15	143.21	142.85	4.94849	4.94498	2353	64	7.76345
162-982B-15H-1-A 16	129.16	143.22	142.86	4.94866	4.94513	2293	70	7.73762
162-982B-15H-1-A 18	129.18	143.24	142.88	4.949	4.94543	2652	58	7.88307
162-982B-15H-1-A 20	129.2	143.26	142.9	4.94933	4.94573	2799	24	7.93702
162-982B-15H-1-A 22	129.22	143.28	142.92	4.94967	4.94603	2493	54	7.82124
162-982B-15H-1-A 24	129.24	143.3	142.94	4.95	4.94633	2597	58	7.86211
162-982B-15H-1-A 25	129.25	143.31	142.95	4.95017	4.94648	2718	35	7.90765
162-982B-15H-1-A 28	129.28	143.34	142.98	4.95067	4.94693	2332	47	7.75448
162-982B-15H-1-A 29	129.29	143.35	142.99	4.95084	4.94708	2582	36	7.85632
162-982B-15H-1-A 35	129.35	143.41	143.05	4.95184	4.94798	2482	52	7.81682
162-982B-15H-1-A 38	129.38	143.44	143.08	4.95234	4.94844	2707	-3	7.9036
162-982B-15H-1-A 39	129.39	143.45	143.09	4.95251	4.94859	2302	45	7.74153
162-982B-15H-1-A 40	129.4	143.46	143.1	4.95268	4.94874	2114	61	7.65634
162-982B-15H-1-A 42	129.42	143.48	143.12	4.95301	4.94904	2082	55	7.64108
162-982B-15H-1-A 43	129.43	143.49	143.13	4.95318	4.94919	2167	35	7.6811
162-982B-15H-1-A 46	129.46	143.52	143.16	4.95368	4.94964	2149	58	7.67276
162-982B-15H-1-A 48	129.48	143.54	143.18	4.95402	4.94994	2157	61	7.67647
162-982B-15H-1-A 50	129.5	143.56	143.2	4.95435	4.95024	2097	58	7.64826
162-982B-15H-1-A 52	129.52	143.58	143.22	4.95469	4.95054	2078	47	7.63916
162-982B-15H-1-A 54	129.54	143.6	143.24	4.95502	4.95084	2128	61	7.66294
162-982B-15H-1-A 56	129.56	143.62	143.26	4.95536	4.95114	2217	92	7.70391
162-982B-15H-1-A 59	129.59	143.65	143.29	4.95586	4.95159	2061	58	7.63095
162-982B-15H-1-A 60	129.6	143.66	143.3	4.95603	4.95174	1905	66	7.55224
162-982B-15H-1-A 61	129.61	143.67	143.31	4.9562	4.95189	1787	50	7.48829
162-982B-15H-1-A 64	129.64	143.7	143.34	4.9567	4.95235	1868	70	7.53262
162-982B-15H-1-A 66	129.66	143.72	143.36	4.95703	4.95265	1999	66	7.6004
162-982B-15H-1-A 67	129.67	143.73	143.37	4.9572	4.9528	1911	44	7.55538
162-982B-15H-1-A 73.5	129.74	143.8	143.44	4.95837	4.95385	1756	49	7.47079
162-982B-15H-1-A 76	129.76	143.82	143.46	4.95871	4.95417	1450	33	7.27932
162-982B-15H-1-A 78	129.78	143.84	143.48	4.95904	4.95452	1661	32	7.41518
162-982B-15H-1-A 80	129.8	143.86	143.5	4.95938	4.95487	1455	40	7.28276
162-982B-15H-1-A 82	129.82	143.88	143.52	4.95971	4.95522	1562	84	7.35372
162-982B-15H-1-A 84	129.84	143.9	143.54	4.96005	4.95557	1402	57	7.24566
162-982B-15H-1-A 86	129.86	143.92	143.56	4.96038	4.95592	1419	22	7.25771
162-982B-15H-1-A 89	129.89	143.95	143.59	4.96088	4.95645	1502	85	7.31455
162-982B-15H-1-A 90	129.9	143.96	143.6	4.96105	4.95662	1398	63	7.2428
162-982B-15H-1-A 92	129.92	143.98	143.62	4.96139	4.95697	1612	66	7.38523
162-982B-15H-1-A 95	129.95	144.01	143.65	4.96189	4.9575	1493	58	7.30854
162-982B-15H-1-A 96	129.96	144.02	143.66	4.96206	4.95767	1519	18	7.32581
162-982B-15H-1-A 98	129.98	144.04	143.68	4.96239	4.95802	1557	32	7.35052
162-982B-15H-1-A 100	130	144.06	143.7	4.96273	4.95837	1876	44	7.5369
162-982B-15H-1-A 102	130.02	144.08	143.72	4.96306	4.95872	1864	55	7.53048
162-982B-15H-1-A 103	130.03	144.09	143.73	4.96323	4.9589	1986	77	7.59388
162-982B-15H-1-A 106	130.06	144.12	143.76	4.96373	4.95942	1759	69	7.4725
162-982B-15H-1-A 108	130.08	144.14	143.78	4.96407	4.95977	2176	102	7.68524
162-982B-15H-1-A 110	130.1	144.16	143.8	4.9644	4.96012	2190	73	7.69166
162-982B-15H-1-A 115	130.15	144.21	143.85	4.96524	4.961	2344	45	7.75961
162-982B-15H-1-A 116	130.16	144.22	143.86	4.96541	4.96117	2451	19	7.80425
162-982B-15H-1-A 118	130.18	144.24	143.88	4.96574	4.96152	2019	38	7.61036
162-982B-15H-1-A 120	130.2	144.26	143.9	4.96608	4.96187	1983	45	7.59237
162-982B-15H-1-A 121	130.21	144.27	143.91	4.96624	4.96205	2115	86	7.65681
162-982B-15H-1-A 122	130.22	144.28	143.92	4.96641	4.96222	2027	24	7.61431
162-982B-15H-1-A 125	130.25	144.31	143.95	4.96691	4.96275	1748	52	7.46623
162-982B-15H-1-A 126	130.26	144.32	143.96	4.96708	4.96292	1809	64	7.50053
162-982B-15H-1-A 129	130.29	144.35	143.99	4.96758	4.96345	1824	78	7.50879
162-982B-15H-1-A 130	130.3	144.36	144	4.96775	4.96362	1782	42	7.48549
162-982B-15H-1-A 132	130.32	144.38	144.02	4.96808	4.96397	1914	12	7.55695
162-982B-15H-1-A 134	130.34	144.4	144.04	4.96842	4.96432	1610	22	7.38399
162-982B-15H-1-A 137	130.37	144.43	144.07	4.96892	4.96485	1629	30	7.39572
162-982B-15H-1-A 138	130.38	144.44	144.08	4.96909	4.96502	1706	35	7.44191
162-982B-15H-1-A 140	130.4	144.46	144.1	4.96942	4.96537	1704	32	7.44073
162-982B-15H-1-A 142	130.42	144.48	144.12	4.96976	4.96572	1688	47	7.4313
162-982B-15H-1-A 143	130.43	144.49	144.13	4.96993	4.9659	1577	20	7.36328
162-982B-15H-1-A 146	130.46	144.52	144.16	4.97043	4.96642	1528	25	7.33171
162-982B-15H-1-A 148	130.48	144.54	144.18	4.97076	4.96677	1172	9	7.06647
162-982B-15H-1-A 149	130.49	144.55	144.19	4.97093	4.96695	1194	50	7.08506
162-982B-15H-2-A 6	130.56	144.62	144.26	4.9721	4.96817	1402	23	7.24566
162-982B-15H-2-A 7	130.57	144.63	144.27	4.97227	4.96835	1272	5	7.14835
162-982B-15H-2-A 9	130.59	144.65	144.29	4.97261	4.9687	1350	82	7.20786
162-982B-15H-2-A 10	130.6	144.66	144.3	4.97277	4.96887	1346	49	7.20489
162-982B-15H-2-A 13	130.63	144.69	144.33	4.97328	4.9694	1547	25	7.34407
162-982B-15H-2-A 14	130.64	144.7	144.34	4.97344	4.96957	1479	20	7.29912
162-982B-15H-2-A 16	130.66	144.72	144.36	4.97378	4.96992	1246	52	7.12769
162-982B-15H-2-A 18	130.68	144.74	144.38	4.97411	4.97027	1479	44	7.29912
162-982B-15H-2-A 20	130.7	144.76	144.4	4.97445	4.97062	1467	52	7.29097
162-982B-15H-2-A 22	130.72	144.78	144.42	4.97478	4.97097	1477	49	7.29777
162-982B-15H-2-A 24	130.74	144.8	144.44	4.97512	4.97132	1570	46	7.35883
162-982B-15H-2-A 25	130.75	144.81	144.45	4.97528	4.9715	1398	88	7.2428
162-982B-15H-2-A 27	130.77	144.83	144.47	4.97562	4.97185	1585	41	7.36834
162-982B-15H-2-A 28	130.78	144.84	144.48	4.97579	4.97202	1508	56	7.31854
162-982B-15H-2-A 29	130.79	144.85	144.49	4.97595	4.9722	1436	65	7.26962
162-982B-15H-2-A 31	130.81	144.87	144.51	4.97629	4.97255	1597	24	7.37588
162-982B-15H-2-A 34	130.84	144.9	144.54	4.97679	4.97307	1499	35	7.31255
162-982B-15H-2-A 37	130.87	144.93	144.57	4.97729	4.9736	1703	38	7.44015
162-982B-15H-2-A 39	130.89	144.95	144.59	4.97763	4.97395	1656	61	7.41216
162-982B-15H-2-A 45	130.95	145.01	144.65	4.97863	4.975	1626	29	7.39388
162-982B-15H-2-A 48	130.98	145.04	144.68	4.97914	4.97555	1698	-6	7.43721
162-982B-15H-2-A 50	131	145.06	144.7	4.97947	4.97592	1637	80	7.40062
162-982B-15H-2-A 51	131.01	145.07	144.71	4.97964	4.97611	1695	30	7.43544
162-982B-15H-2-A 54	131.04	145.1	144.74	4.98014	4.97666	1866	25	7.53155
162-982B-15H-2-A 55	131.05	145.11	144.75	4.98031	4.97685	1695	51	7.43544
162-982B-15H-2-A 58	131.08	145.14	144.78	4.98081	4.9774	1621	41	7.3908
162-982B-15H-2-A 61	131.11	145.17	144.81	4.98131	4.97795	1707	44	7.44249
162-982B-15H-2-A 62	131.12	145.18	144.82	4.98148	4.97814	1579	52	7.36455
162-982B-15H-2-A 63	131.13	145.19	144.83	4.98165	4.97832	1598	31	7.37651
162-982B-15H-2-A 66	131.16	145.22	144.86	4.98215	4.97888	1423	16	7.26052
162-982B-15H-2-A 69	131.19	145.25	144.89	4.98265	4.97943	1423	13	7.26052
162-982B-15H-2-A 70	131.2	145.26	144.9	4.98282	4.97962	1397	39	7.24208
162-982B-15H-2-A 72	131.22	145.28	144.92	4.98315	4.97998	1350	13	7.20786
162-982B-15H-2-A 74	131.24	145.3	144.94	4.98349	4.98035	1443	64	7.27448
162-982B-15H-2-A 76	131.26	145.32	144.96	4.98382	4.98072	1565	22	7.35564
162-982B-15H-2-A 77	131.27	145.33	144.97	4.98399	4.98091	1386	38	7.23418
162-982B-15H-2-A 79.5	131.3	145.36	145	4.98449	4.98146	1305	89	7.17396
162-982B-15H-2-A 84	131.34	145.4	145.04	4.98516	4.9822	1314	64	7.18083
162-982B-15H-2-A 86	131.36	145.42	145.06	4.9855	4.98257	1433	78	7.26753
162-982B-15H-2-A 88	131.38	145.44	145.08	4.98583	4.98294	1275	22	7.1507
162-982B-15H-2-A 90	131.4	145.46	145.1	4.98617	4.98331	1448	52	7.27794
162-982B-15H-2-A 92	131.42	145.48	145.12	4.9865	4.98368	1353	37	7.21008
162-982B-15H-2-A 95	131.45	145.51	145.15	4.98701	4.98423	1502	50	7.31455
162-982B-15H-2-A 96	131.46	145.52	145.16	4.98717	4.98442	1489	4	7.30586
162-982B-15H-2-A 98	131.48	145.54	145.18	4.98751	4.98478	1305	66	7.17396
162-982B-15H-2-A 99	131.49	145.55	145.19	4.98768	4.98497	1286	43	7.15929
162-982B-15H-2-A 101	131.51	145.57	145.21	4.98801	4.98534	1343	47	7.20266
162-982B-15H-2-A 104	131.54	145.6	145.24	4.98851	4.98589	1254	36	7.13409
162-982B-15H-2-A 106	131.56	145.62	145.26	4.98885	4.98626	1284	47	7.15774
162-982B-15H-2-A 109	131.59	145.65	145.29	4.98935	4.98682	1427	58	7.26333
162-982B-15H-2-A 110	131.6	145.66	145.3	4.98952	4.987	1376	59	7.22694
162-982B-15H-2-A 112	131.62	145.68	145.32	4.98985	4.98737	1523	64	7.32844
162-982B-15H-2-A 114	131.64	145.7	145.34	4.99019	4.98774	1265	86	7.14283
162-982B-15H-2-A 117	131.67	145.73	145.37	4.99069	4.98829	1401	38	7.24494
162-982B-15H-2-A 118	131.68	145.74	145.38	4.99086	4.98848	1241	56	7.12367
162-982B-15H-2-A 119	131.69	145.75	145.39	4.99102	4.98866	1255	45	7.13489
162-982B-15H-2-A 124	131.74	145.8	145.44	4.99186	4.98958	1070	58	6.97541
162-982B-15H-2-A 126	131.76	145.82	145.46	4.9922	4.98995	1089	62	6.99302
162-982B-15H-2-A 128	131.78	145.84	145.48	4.99253	4.99032	1134	38	7.03351
162-982B-15H-2-A 130	131.8	145.86	145.5	4.99287	4.99069	1295	66	7.16627
162-982B-15H-2-A 131	131.81	145.87	145.51	4.99303	4.99088	1078	58	6.98286
162-982B-15H-2-A 132	131.82	145.88	145.52	4.9932	4.99106	1100	34	7.00307
162-982B-15H-2-A 135	131.85	145.91	145.55	4.9937	4.99162	1148	-3	7.04578
162-982B-15H-2-A 136	131.86	145.92	145.56	4.99387	4.9918	1211	45	7.0992
162-982B-15H-2-A 138	131.88	145.94	145.58	4.99421	4.99217	1184	47	7.07665
162-982B-15H-2-A 139	131.89	145.95	145.59	4.99437	4.99235	1315	36	7.18159
162-982B-15H-2-A 141	131.91	145.97	145.61	4.99471	4.99272	1219	16	7.10579
162-982B-15H-2-A 142	131.92	145.98	145.62	4.99488	4.99291	1177	24	7.07072
162-982B-15H-2-A 144	131.94	146	145.64	4.99521	4.99328	1160	44	7.05618
162-982B-15H-2-A 146	131.96	146.02	145.66	4.99555	4.99365	1117	44	7.0184
162-982B-15H-2-A 148	131.98	146.04	145.68	4.99588	4.99402	1129	61	7.02909
162-982B-15H-2-A 150	132	146.06	145.7	4.99622	4.99438	1177	39	7.07072
162-982B-15H-3-A 2	132.02	146.08	145.72	4.99655	4.99475	1307	30	7.17549
162-982B-15H-3-A 5	132.05	146.11	145.75	4.99705	4.99531	1206	81	7.09506
162-982B-15H-3-A 6	132.06	146.12	145.76	4.99722	4.99549	1227	40	7.11233
162-982B-15H-3-A 7	132.07	146.13	145.77	4.99739	4.99568	997	59	6.90475
162-982B-15H-3-A 13	132.13	146.19	145.83	4.99839	4.99678	1267	39	7.14441
162-982B-15H-3-A 15	132.15	146.21	145.85	4.99873	4.99715	1138	50	7.03703
162-982B-15H-3-A 16	132.16	146.22	145.86	4.99889	4.99734	1310	60	7.17778
162-982B-15H-3-A 18	132.18	146.24	145.88	4.99923	4.99771	1136	85	7.03527
162-982B-15H-3-A 21	132.21	146.27	145.91	4.99973	4.99826	1382	47	7.23129
162-982B-15H-3-A 22	132.22	146.28	145.92	4.9999	4.99845	1289	47	7.16162
162-982B-15H-3-A 23	132.23	146.29	145.93	5.00007	4.99863	1170	47	7.06476
162-982B-15H-3-A 26	132.26	146.32	145.96	5.00057	4.99914	1396	49	7.24137
162-982B-15H-3-A 29	132.29	146.35	145.99	5.00107	4.99955	1064	20	6.96979
162-982B-15H-3-A 30	132.3	146.36	146	5.00124	4.99969	1324	52	7.18841
162-982B-15H-3-A 32	132.32	146.38	146.02	5.00157	4.99996	1427	60	7.26333
162-982B-15H-3-A 33	132.33	146.39	146.03	5.00174	5.0001	1341	37	7.20117
162-982B-15H-3-A 35.5	132.36	146.42	146.06	5.00224	5.00051	1375	43	7.22621
162-982B-15H-3-A 39	132.39	146.45	146.09	5.00275	5.00092	1392	30	7.2385
162-982B-15H-3-A 40	132.4	146.46	146.1	5.00291	5.00106	1345	41	7.20415
162-982B-15H-3-A 42	132.42	146.48	146.12	5.00325	5.00133	1417	38	7.2563
162-982B-15H-3-A 44.5	132.45	146.51	146.15	5.00375	5.00174	1294	37	7.16549
162-982B-15H-3-A 46.5	132.47	146.53	146.17	5.00409	5.00201	1409	55	7.25064
162-982B-15H-3-A 48	132.48	146.54	146.18	5.00425	5.00215	1308	72	7.17625
162-982B-15H-3-A 49	132.49	146.55	146.19	5.00442	5.00229	1499	74	7.31255
162-982B-15H-3-A 55	132.55	146.61	146.25	5.00542	5.00311	1569	66	7.35819
162-982B-15H-3-A 56	132.56	146.62	146.26	5.00559	5.00325	1520	41	7.32647
162-982B-15H-3-A 58	132.58	146.64	146.28	5.00593	5.00352	1491	56	7.3072
162-982B-15H-3-A 61	132.61	146.67	146.31	5.00643	5.00393	1531	110	7.33368
162-982B-15H-3-A 62	132.62	146.68	146.32	5.0066	5.00407	1555	78	7.34923
162-982B-15H-3-A 65	132.65	146.71	146.35	5.0071	5.00448	1681	31	7.42714
162-982B-15H-3-A 66	132.66	146.72	146.36	5.00727	5.00462	1660	76	7.41457
162-982B-15H-3-A 67	132.67	146.73	146.37	5.00743	5.00476	1716	66	7.44775
162-982B-15H-3-A 72	132.72	146.78	146.42	5.00827	5.00544	1430	72	7.26543
162-982B-15H-3-A 74	132.74	146.8	146.44	5.00861	5.00571	1376	37	7.22694
162-982B-15H-3-A 77	132.77	146.83	146.47	5.00911	5.00613	1483	36	7.30182
162-982B-15H-3-A 78	132.78	146.84	146.48	5.00928	5.00626	1537	89	7.33759
162-982B-15H-3-A 79	132.79	146.85	146.49	5.00944	5.0064	1521	41	7.32712
162-982B-15H-3-A 82	132.82	146.88	146.52	5.00995	5.00681	1580	63	7.36518
162-982B-15H-3-A 83	132.83	146.89	146.53	5.01011	5.00695	1492	44	7.30787
162-982B-15H-3-A 86	132.86	146.92	146.56	5.01062	5.00736	1499	64	7.31255
162-982B-15H-3-A 87	132.87	146.93	146.57	5.01078	5.0075	1529	64	7.33237
162-982B-15H-3-A 89	132.89	146.95	146.59	5.01112	5.00777	1582	47	7.36645
162-982B-15H-3-A 94	132.94	147	146.64	5.01196	5.00846	1692	86	7.43367
162-982B-15H-3-A 97	132.97	147.03	146.67	5.01246	5.00887	1443	80	7.27448
162-982B-15H-3-A 98	132.98	147.04	146.68	5.01262	5.009	1802	36	7.49665
162-982B-15H-3-A 100	133	147.06	146.7	5.01296	5.00928	1831	89	7.51262
162-982B-15H-3-A 102	133.02	147.08	146.72	5.01329	5.00955	2085	86	7.64252
162-982B-15H-3-A 103	133.03	147.09	146.73	5.01346	5.00969	2002	70	7.6019
162-982B-15H-3-A 106	133.06	147.12	146.76	5.01396	5.0101	2638	103	7.87778
162-982B-15H-3-A 109	133.09	147.15	146.79	5.01447	5.01051	3210	118	8.07403
162-982B-15H-3-A 110	133.1	147.16	146.8	5.01463	5.01065	3297	101	8.10077
162-982B-15H-3-A 112	133.12	147.18	146.82	5.01497	5.01092	3896	172	8.26771
162-982B-15H-3-A 114	133.14	147.2	146.84	5.0153	5.0112	4350	116	8.37793
162-982B-15H-3-A 117	133.17	147.23	146.87	5.01581	5.01161	5403	210	8.59471
162-982B-15H-3-A 118	133.18	147.24	146.88	5.01597	5.01174	5522	190	8.6165
162-982B-15H-3-A 119	133.19	147.25	146.89	5.01614	5.01188	4793	201	8.47491
162-982B-15H-3-A 122	133.22	147.28	146.92	5.01664	5.01229	6557	70	8.78829
162-982B-15H-3-A 123	133.23	147.29	146.93	5.01681	5.01243	2026	72	7.61382
162-982B-15H-3-A 124	133.24	147.3	146.94	5.01698	5.01257	2038	70	7.61972
162-982B-15H-3-A 126	133.26	147.32	146.96	5.01731	5.01284	2038	72	7.61972
162-982B-15H-3-A 127	133.27	147.33	146.97	5.01748	5.01298	2038	72	7.61972
162-982B-15H-3-A 128	133.28	147.34	146.98	5.01765	5.01311	2038	70	7.61972
162-982B-15H-3-A 129	133.29	147.35	146.99	5.01782	5.01325	2038	70	7.61972
162-982B-15H-3-A 134	133.34	147.4	147.04	5.01865	5.01394	2591	55	7.8598
162-982B-15H-3-A 135	133.35	147.41	147.05	5.01882	5.01407	2145	79	7.67089
162-982B-15H-3-A 138	133.38	147.44	147.08	5.01932	5.01449	2191	55	7.69211
162-982B-15H-3-A 139	133.39	147.45	147.09	5.01949	5.01462	2089	-15	7.64444
162-982B-15H-3-A 142	133.42	147.48	147.12	5.01999	5.01503	1987	52	7.59438
162-982B-15H-3-A 144	133.44	147.5	147.14	5.02033	5.01531	1871	58	7.53423
162-982B-15H-3-A 146	133.46	147.52	147.16	5.02066	5.01558	1946	30	7.57353
162-982B-15H-3-A 148	133.48	147.54	147.18	5.021	5.01586	1866	63	7.53155
162-982B-15H-4-A 2	133.52	147.58	147.22	5.02167	5.0164	2206	78	7.69894
162-982B-15H-4-A 4	133.54	147.6	147.24	5.022	5.01668	2026	55	7.61382
162-982B-15H-4-A 7	133.57	147.63	147.27	5.0225	5.01709	2038	55	7.61972
162-982B-15H-4-A 8	133.58	147.64	147.28	5.02267	5.01723	1925	57	7.56268
162-982B-15H-4-A 10	133.6	147.66	147.3	5.02301	5.0175	1932	63	7.56631
162-982B-15H-4-A 12	133.62	147.68	147.32	5.02334	5.01777	1792	35	7.49109
162-982B-15H-4-A 13	133.63	147.69	147.33	5.02351	5.01791	2008	28	7.60489
162-982B-15H-4-A 15	133.65	147.71	147.35	5.02384	5.01819	2247	77	7.71735
162-982B-15H-4-A 18	133.68	147.74	147.38	5.02435	5.0186	2345	49	7.76004
162-982B-15H-4-A 27	133.77	147.83	147.47	5.02585	5.01983	2067	73	7.63385
162-982B-15H-4-A 28	133.78	147.84	147.48	5.02602	5.01997	1980	44	7.59085
162-982B-15H-4-A 30	133.8	147.86	147.5	5.02636	5.02024	1996	72	7.5989
162-982B-15H-4-A 32	133.82	147.88	147.52	5.02669	5.02051	2048	52	7.62462
162-982B-15H-4-A 33	133.83	147.89	147.53	5.02686	5.02065	1964	74	7.58274
162-982B-15H-4-A 35.5	133.86	147.92	147.56	5.02736	5.02106	1669	46	7.41998
162-982B-15H-4-A 39	133.89	147.95	147.59	5.02786	5.02147	1768	7	7.4776
162-982B-15H-4-A 40	133.9	147.96	147.6	5.02803	5.02161	1572	56	7.3601
162-982B-15H-4-A 41	133.91	147.97	147.61	5.0282	5.02175	1448	47	7.27794
162-982B-15H-4-A 44	133.94	148	147.64	5.0287	5.02216	1271	53	7.14756
162-982B-15H-4-A 45	133.95	148.01	147.65	5.02887	5.0223	1332	47	7.19444
162-982B-15H-4-A 48	133.98	148.04	147.68	5.02937	5.02271	1555	67	7.34923
162-982B-15H-4-A 50	134	148.06	147.7	5.0297	5.02298	1479	50	7.29912
162-982B-15H-4-A 52	134.02	148.08	147.72	5.03004	5.02326	1308	27	7.17625
162-982B-15H-4-A 55	134.05	148.11	147.75	5.03054	5.02367	1322	38	7.1869
162-982B-15H-4-A 58	134.08	148.14	147.78	5.03104	5.02408	1431	54	7.26613
162-982B-15H-4-A 63	134.13	148.19	147.83	5.03188	5.02476	1430	31	7.26543
162-982B-15H-4-A 65	134.15	148.21	147.85	5.03222	5.02504	1360	39	7.21524
162-982B-15H-4-A 68	134.18	148.24	147.88	5.03272	5.02545	1522	52	7.32778
162-982B-15H-4-A 70	134.2	148.26	147.9	5.03305	5.02572	1544	58	7.34213
162-982B-15H-4-A 72	134.22	148.28	147.92	5.03339	5.026	1262	76	7.14045
162-982B-15H-4-A 75	134.25	148.31	147.95	5.03389	5.02641	1395	86	7.24065
162-982B-15H-4-A 77	134.27	148.33	147.97	5.03423	5.02668	1396	52	7.24137
162-982B-15H-4-A 79	134.29	148.35	147.99	5.03456	5.02696	1389	37	7.23634
162-982B-15H-4-A 80	134.3	148.36	148	5.03473	5.02709	1389	50	7.23634
162-982B-15H-4-A 81	134.31	148.37	148.01	5.03489	5.02723	1576	59	7.36265
162-982B-15H-4-A 84	134.34	148.4	148.04	5.0354	5.02764	1503	33	7.31522
162-982B-15H-4-A 85	134.35	148.41	148.05	5.03556	5.02778	1394	84	7.23993
162-982B-15H-4-A 88	134.38	148.44	148.08	5.03607	5.02819	1478	36	7.29845
162-982B-15H-4-A 90	134.4	148.46	148.1	5.0364	5.02846	1706	71	7.44191
162-982B-15H-4-A 92	134.42	148.48	148.12	5.03674	5.02874	1461	64	7.28688
162-982B-15H-4-A 93	134.43	148.49	148.13	5.0369	5.02887	1236	59	7.11964
162-982B-15H-4-A 96	134.46	148.52	148.16	5.03741	5.02929	1402	64	7.24566
162-982B-15H-4-A 97	134.47	148.53	148.17	5.03757	5.02942	1619	36	7.38956
162-982B-15H-4-A 104	134.54	148.6	148.24	5.03875	5.03038	1304	50	7.17319
162-982B-15H-4-A 105	134.55	148.61	148.25	5.03891	5.03052	1319	58	7.18463
162-982B-15H-4-A 108	134.58	148.64	148.28	5.03942	5.03093	1453	44	7.28139
162-982B-15H-4-A 110	134.6	148.66	148.3	5.03975	5.0312	1337	46	7.19818
162-982B-15H-4-A 111	134.61	148.67	148.31	5.03992	5.03134	1245	28	7.12689
162-982B-15H-4-A 115	134.65	148.71	148.35	5.04059	5.03189	1489	83	7.30586
162-982B-15H-4-A 116	134.66	148.72	148.36	5.04076	5.03203	1560	72	7.35244
162-982B-15H-4-A 118	134.68	148.74	148.38	5.04109	5.0323	1333	40	7.19519
162-982B-15H-4-A 120	134.7	148.76	148.4	5.04143	5.03257	1246	55	7.12769
162-982B-15H-4-A 123	134.73	148.79	148.43	5.04193	5.03299	1411	58	7.25205
162-982B-15H-4-A 124	134.74	148.8	148.44	5.0421	5.03312	1286	76	7.15929
162-982B-15H-4-A 127	134.77	148.83	148.47	5.0426	5.03353	1354	61	7.21082
162-982B-15H-4-A 128	134.78	148.84	148.48	5.04276	5.03367	1335	53	7.19669
162-982B-15H-4-A 130	134.8	148.86	148.5	5.0431	5.03394	1294	61	7.16549
162-982B-15H-4-A 132	134.82	148.88	148.52	5.04343	5.03422	1259	39	7.13807
162-982B-15H-4-A 133	134.83	148.89	148.53	5.0436	5.03436	1420	29	7.25841
162-982B-15H-4-A 136	134.86	148.92	148.56	5.0441	5.03477	1482	58	7.30115
162-982B-15H-4-A 138	134.88	148.94	148.58	5.04444	5.03504	1281	38	7.1554
162-982B-15H-4-A 143	134.93	148.99	148.63	5.04528	5.03573	1345	24	7.20415
162-982B-15H-4-A 144	134.94	149	148.64	5.04544	5.03586	1403	24	7.24637
162-982B-15H-4-A 146	134.96	149.02	148.66	5.04578	5.03613	1459	32	7.28551
162-982B-15H-4-A 148	134.98	149.04	148.68	5.04611	5.03639	1512	36	7.32119
162-982B-15H-4-A 149	134.99	149.05	148.69	5.04628	5.03652	1320	53	7.18539
162-982B-15H-5-A 2	135.02	149.08	148.72	5.04678	5.03691	1489	30	7.30586
162-982B-15H-5-A 3	135.03	149.09	148.73	5.04695	5.03704	1534	44	7.33563
162-982B-15H-5-A 9	135.09	149.15	148.79	5.04796	5.03782	1377	22	7.22766
162-982B-15H-5-A 10	135.1	149.16	148.8	5.04812	5.03795	1411	26	7.25205
162-982B-15H-5-A 13	135.13	149.19	148.83	5.04863	5.03834	1541	66	7.34019
162-982B-15H-5-A 14	135.14	149.2	148.84	5.04879	5.03847	1206	54	7.09506
162-982B-15H-5-A 19	135.19	149.25	148.89	5.04963	5.03912	1590	27	7.37149
162-982B-15H-5-A 20	135.2	149.26	148.9	5.0498	5.03924	1670	48	7.42058
162-982B-15H-5-A 21	135.21	149.27	148.91	5.04996	5.03937	1504	44	7.31588
162-982B-15H-5-A 24	135.24	149.3	148.94	5.05047	5.03976	1225	13	7.1107
162-982B-15H-5-A 28	135.28	149.34	148.98	5.05114	5.04028	1056	51	6.96224
162-982B-15H-5-A 31	135.31	149.37	149.01	5.05164	5.04067	1186	19	7.07834
162-982B-15H-5-A 33	135.33	149.39	149.03	5.05197	5.04093	1384	51	7.23273
162-982B-15H-5-A 37	135.37	149.43	149.07	5.05264	5.04145	1504	31	7.31588
162-982B-15H-5-A 38	135.38	149.44	149.08	5.05281	5.04158	1533	47	7.33498
162-982B-15H-5-A 39	135.39	149.45	149.09	5.05298	5.04171	1584	24	7.36771
162-982B-15H-5-A 42	135.42	149.48	149.12	5.05348	5.0421	1549	69	7.34536
162-982B-15H-5-A 47	135.47	149.53	149.17	5.05432	5.04275	1687	75	7.43071
162-982B-15H-5-A 48	135.48	149.54	149.18	5.05449	5.04288	1337	57	7.19818
162-982B-15H-5-A 49	135.49	149.55	149.19	5.05465	5.04301	1488	74	7.30519
162-982B-15H-5-A 52	135.52	149.58	149.22	5.05516	5.0434	1505	79	7.31655
162-982B-15H-5-A 53	135.53	149.59	149.23	5.05532	5.04353	1506	41	7.31721
162-982B-15H-5-A 56	135.56	149.62	149.26	5.05583	5.04392	1538	91	7.33824
162-982B-15H-5-A 58	135.58	149.64	149.28	5.05616	5.04418	1629	73	7.39572
162-982B-15H-5-A 61	135.61	149.67	149.31	5.05666	5.04457	1482	34	7.30115
162-982B-15H-5-A 62	135.62	149.68	149.32	5.05683	5.0447	1638	27	7.40123
162-982B-15H-5-A 65	135.65	149.71	149.35	5.05733	5.04509	1781	56	7.48493
162-982B-15H-5-A 66	135.66	149.72	149.36	5.0575	5.04522	1664	43	7.41698
162-982B-15H-5-A 68	135.68	149.74	149.38	5.05783	5.04547	1688	52	7.4313
162-982B-15H-5-A 69	135.69	149.75	149.39	5.058	5.0456	1610	22	7.38399
162-982B-15H-5-A 70	135.7	149.76	149.4	5.05817	5.04573	1558	29	7.35116
162-982B-15H-5-A 73	135.73	149.79	149.43	5.05867	5.04612	1587	72	7.3696
162-982B-15H-5-A 74	135.74	149.8	149.44	5.05884	5.04625	1872	38	7.53476
162-982B-15H-5-A 77	135.77	149.83	149.47	5.05934	5.04664	1854	47	7.5251
162-982B-15H-5-A 78	135.78	149.84	149.48	5.05951	5.04677	1721	72	7.45066
162-982B-15H-5-A 80	135.8	149.86	149.5	5.05984	5.04703	1622	58	7.39142
162-982B-15H-5-A 82	135.82	149.88	149.52	5.06018	5.04729	1953	52	7.57712
162-982B-15H-5-A 84	135.84	149.9	149.54	5.06051	5.04755	1603	40	7.37963
162-982B-15H-5-A 85	135.85	149.91	149.55	5.06068	5.04768	1540	48	7.33954
162-982B-15H-5-A 87.5	135.88	149.94	149.58	5.06118	5.04807	2090	47	7.64492
162-982B-15H-5-A 90	135.9	149.96	149.6	5.06152	5.04833	1940	38	7.57044
162-982B-15H-5-A 92	135.92	149.98	149.62	5.06185	5.04859	1764	48	7.47534
162-982B-15H-5-A 95	135.95	150.01	149.65	5.06236	5.04898	1698	45	7.43721
162-982B-15H-5-A 96	135.96	150.02	149.66	5.06252	5.04911	1584	37	7.36771
162-982B-15H-5-A 98	135.98	150.04	149.68	5.06286	5.04937	1563	39	7.35436
162-982B-15H-5-A 99	135.99	150.05	149.69	5.06303	5.0495	1616	2	7.38771
162-982B-15H-5-A 102	136.02	150.08	149.72	5.06353	5.04989	1465	44	7.28961
162-982B-15H-5-A 103	136.03	150.09	149.73	5.0637	5.05002	1418	28	7.257
162-982B-15H-5-A 105.5	136.06	150.12	149.76	5.0642	5.05041	1473	64	7.29506
162-982B-15H-5-A 108	136.08	150.14	149.78	5.06453	5.05067	1307	66	7.17549
162-982B-15H-5-A 109	136.09	150.15	149.79	5.0647	5.0508	1553	45	7.34794
162-982B-15H-5-A 112	136.12	150.18	149.82	5.0652	5.05119	1476	-6	7.29709
162-982B-15H-5-A 115	136.15	150.21	149.85	5.0657	5.05158	1405	50	7.24779
162-982B-15H-5-A 118	136.18	150.24	149.88	5.06621	5.05196	1649	50	7.40792
162-982B-15H-5-A 120	136.2	150.26	149.9	5.06654	5.05222	1587	61	7.3696
162-982B-15H-5-A 121	136.21	150.27	149.91	5.06671	5.05235	1580	22	7.36518
162-982B-15H-5-A 124	136.24	150.3	149.94	5.06721	5.05274	1811	75	7.50163
162-982B-15H-5-A 125	136.25	150.31	149.95	5.06738	5.05287	1823	36	7.50824
162-982B-15H-5-A 128	136.28	150.34	149.98	5.06788	5.05326	1906	53	7.55276
162-982B-15H-5-A 129	136.29	150.35	149.99	5.06805	5.05339	1676	75	7.42417
162-982B-15H-5-A 132	136.32	150.38	150.02	5.06855	5.05378	1917	66	7.55852
162-982B-15H-5-A 133	136.33	150.39	150.03	5.06872	5.05391	1941	81	7.57096
162-982B-15H-5-A 135.5	136.36	150.42	150.06	5.06922	5.0543	1734	28	7.45819
162-982B-15H-5-A 137	136.37	150.43	150.07	5.06939	5.05443	2017	41	7.60937
162-982B-15H-5-A 139	136.39	150.45	150.09	5.06972	5.05469	2094	66	7.64683
162-982B-15H-5-A 140	136.4	150.46	150.1	5.06989	5.05482	2273	35	7.72886
162-982B-15H-5-A 143	136.43	150.49	150.13	5.07039	5.05521	2456	19	7.80629
162-982B-15H-5-A 144	136.44	150.5	150.14	5.07056	5.05534	2463	23	7.80914
162-982B-15H-5-A 146	136.46	150.52	150.16	5.0709	5.0556	2475	52	7.814
162-982B-15H-5-A 148	136.48	150.54	150.18	5.07123	5.05586	2321	71	7.74975
162-982B-15H-6-A 2	136.52	150.58	150.22	5.0719	5.05638	2504	52	7.82564
162-982B-15H-6-A 3	136.53	150.59	150.23	5.07207	5.05651	2566	20	7.8501
162-982B-15H-6-A 7	136.57	150.63	150.27	5.07274	5.05703	1822	54	7.50769
162-982B-15H-6-A 10	136.6	150.66	150.3	5.07324	5.05742	2908	51	7.97522
162-982B-15H-6-A 11	136.61	150.67	150.31	5.07341	5.05755	3035	49	8.01797
162-982B-15H-6-A 13.5	136.64	150.7	150.34	5.07391	5.05794	3040	20	8.01961
162-982B-15H-6-A 19	136.69	150.75	150.39	5.07475	5.05858	2776	52	7.92877
162-982B-15H-6-A 22	136.72	150.78	150.42	5.07525	5.05897	3210	75	8.07403
162-982B-15H-6-A 23	136.73	150.79	150.43	5.07542	5.0591	3471	68	8.1522
162-982B-15H-6-A 29	136.79	150.85	150.49	5.07642	5.05988	3646	61	8.20139
162-982B-15H-6-A 30	136.8	150.86	150.5	5.07659	5.06001	4005	112	8.2953
162-982B-15H-6-A 31	136.81	150.87	150.51	5.07676	5.06014	3405	41	8.133
162-982B-15H-6-A 33	136.83	150.89	150.53	5.07709	5.0604	3533	47	8.1699
162-982B-15H-6-A 38	136.88	150.94	150.58	5.07793	5.06105	3435	59	8.14177
162-982B-15H-6-A 41	136.91	150.97	150.61	5.07843	5.06144	3926	2	8.27538
162-982B-15H-6-A 42	136.92	150.98	150.62	5.0786	5.06157	3620	36	8.19423
162-982B-15H-6-A 43	136.93	150.99	150.63	5.07877	5.0617	3551	55	8.17498
162-982B-15H-6-A 48	136.98	151.04	150.68	5.0796	5.06235	2639	13	7.87816
162-982B-15H-6-A 51	137.01	151.07	150.71	5.08011	5.06274	2150	28	7.67322
162-982B-15H-6-A 52	137.02	151.08	150.72	5.08027	5.06287	1861	33	7.52887
162-982B-15H-6-A 53	137.03	151.09	150.73	5.08044	5.063	1640	45	7.40245
162-982B-15H-6-A 56	137.06	151.12	150.76	5.08094	5.06339	1620	55	7.39018
162-982B-15H-6-A 59	137.09	151.15	150.79	5.08144	5.06378	1853	69	7.52456
162-982B-15H-6-A 60	137.1	151.16	150.8	5.08161	5.06391	1614	34	7.38647
162-982B-15H-6-A 61	137.11	151.17	150.81	5.08178	5.06404	1626	30	7.39388
162-982B-15H-6-A 65	137.15	151.21	150.85	5.08245	5.06455	1548	50	7.34472
162-982B-15H-6-A 66	137.16	151.22	150.86	5.08262	5.06468	1601	50	7.37838
162-982B-15H-6-A 68	137.18	151.24	150.88	5.08295	5.06494	1475	73	7.29641
162-982B-15H-6-A 70.5	137.21	151.27	150.91	5.08345	5.06533	1646	44	7.4061
162-982B-15H-6-A 73	137.23	151.29	150.93	5.08379	5.06559	1612	61	7.38523
162-982B-15H-6-A 74	137.24	151.3	150.94	5.08396	5.06572	1618	73	7.38895
162-982B-15H-6-A 76.5	137.27	151.33	150.97	5.08446	5.06611	1587	38	7.3696
162-982B-15H-6-A 79	137.29	151.35	150.99	5.08479	5.06637	1516	53	7.32383
162-982B-15H-6-A 82	137.32	151.38	151.02	5.0853	5.06676	1488	42	7.30519
162-982B-15H-6-A 84	137.34	151.4	151.04	5.08563	5.06702	1964	61	7.58274
162-982B-15H-6-A 85	137.35	151.41	151.05	5.0858	5.06715	1668	114	7.41938
162-982B-15H-6-A 86	137.36	151.42	151.06	5.08597	5.06728	1794	69	7.4922
162-982B-15H-6-A 88	137.38	151.44	151.08	5.0863	5.06754	1853	63	7.52456
162-982B-15H-6-A 90	137.4	151.46	151.1	5.08664	5.0678	1989	55	7.59539
162-982B-15H-6-A 91	137.41	151.47	151.11	5.0868	5.06793	1898	19	7.54856
162-982B-15H-6-A 94	137.44	151.5	151.14	5.08731	5.06832	2055	95	7.62803
162-982B-15H-6-A 96	137.46	151.52	151.16	5.08764	5.06858	2185	67	7.68937
162-982B-15H-6-A 97	137.47	151.53	151.17	5.08781	5.06871	2010	39	7.60589
162-982B-15H-6-A 99.5	137.5	151.56	151.2	5.08831	5.0691	1997	45	7.5994
162-982B-15H-6-A 102	137.52	151.58	151.22	5.08864	5.06936	2452	79	7.80466
162-982B-15H-6-A 104	137.54	151.6	151.24	5.08898	5.06962	2437	106	7.79852
162-982B-15H-6-A 105	137.55	151.61	151.25	5.08915	5.06975	2647	67	7.88118
162-982B-15H-6-A 108	137.58	151.64	151.28	5.08965	5.07014	2703	84	7.90212
162-982B-15H-6-A 112	137.62	151.68	151.32	5.09032	5.07065	3288	88	8.09803
162-982B-15H-6-A 114	137.64	151.7	151.34	5.09065	5.07091	3621	110	8.19451
162-982B-15H-6-A 118	137.68	151.74	151.38	5.09132	5.07143	4296	135	8.36544
162-982B-15H-6-A 119	137.69	151.75	151.39	5.09149	5.07156	4873	161	8.49147
162-982B-15H-6-A 120	137.7	151.76	151.4	5.09166	5.07169	4363	120	8.38092
162-982B-15H-6-A 123	137.73	151.79	151.43	5.09216	5.07208	4682	100	8.45148
162-982B-15H-6-A 124	137.74	151.8	151.44	5.09233	5.07221	3875	126	8.2623
162-982B-15H-6-A 126	137.76	151.82	151.46	5.09266	5.07247	4655	107	8.4457
162-982B-15H-6-A 129	137.79	151.85	151.49	5.09317	5.07286	2005	69	7.6034
162-982B-15H-6-A 130	137.8	151.86	151.5	5.09333	5.07299	2785	103	7.932
162-982B-15H-6-A 133	137.83	151.89	151.53	5.09384	5.07338	2498	59	7.82325
162-982B-15H-6-A 134	137.84	151.9	151.54	5.094	5.07351	1514	54	7.32251
162-982B-15H-6-A 136	137.86	151.92	151.56	5.09434	5.07377	1834	55	7.51425
162-982B-15H-6-A 139	137.89	151.95	151.59	5.09484	5.07416	1750	34	7.46737
162-982B-15H-6-A 140	137.9	151.96	151.6	5.09501	5.07429	1908	44	7.55381
162-982B-15H-6-A 142	137.92	151.98	151.62	5.09534	5.07455	2211	118	7.7012
162-982B-15H-6-A 145	137.95	152.01	151.65	5.09584	5.07494	1379	61	7.22911
162-982B-15H-6-A 146	137.96	152.02	151.66	5.09601	5.07507	1580	31	7.36518
162-982B-15H-6-A 148	137.98	152.04	151.68	5.09635	5.07533	1828	93	7.51098
162-982B-16H-2-A 2	140.02	154.76	154.47	5.14306	5.13464	1939	75	7.56993
162-982B-16H-2-A 4	140.04	154.78	154.49	5.1434	5.13517	2058	65	7.62949
162-982B-16H-2-A 6	140.06	154.8	154.51	5.14373	5.1357	2080	61	7.64012
162-982B-16H-2-A 7	140.07	154.81	154.52	5.1439	5.13596	2127	77	7.66247
162-982B-16H-2-A 11	140.11	154.85	154.56	5.14457	5.13702	1907	66	7.55329
162-982B-16H-2-A 12	140.12	154.86	154.57	5.14474	5.13728	2016	31	7.60887
162-982B-16H-2-A 14	140.14	154.88	154.59	5.14507	5.13781	1851	45	7.52348
162-982B-16H-2-A 16	140.16	154.9	154.61	5.14541	5.13834	2239	46	7.71378
162-982B-16H-2-A 17	140.17	154.91	154.62	5.14558	5.1386	2064	65	7.6324
162-982B-16H-2-A 20	140.2	154.94	154.65	5.14608	5.1394	2118	74	7.65823
162-982B-16H-2-A 22	140.22	154.96	154.67	5.14641	5.13992	2125	81	7.66153
162-982B-16H-2-A 23	140.23	154.97	154.68	5.14658	5.14019	2449	42	7.80344
162-982B-16H-2-A 27	140.27	155.01	154.72	5.14725	5.14125	2421	-7	7.79194
162-982B-16H-2-A 28	140.28	155.02	154.73	5.14742	5.14151	2262	61	7.724
162-982B-16H-2-A 31	140.31	155.05	154.76	5.14792	5.1423	2400	43	7.78322
162-982B-16H-2-A 32	140.32	155.06	154.77	5.14809	5.14257	2645	38	7.88043
162-982B-16H-2-A 34	140.34	155.08	154.79	5.14842	5.14309	2374	53	7.77233
162-982B-16H-2-A 36	140.36	155.1	154.81	5.14876	5.14362	2605	41	7.86519
162-982B-16H-2-A 39	140.39	155.13	154.84	5.14926	5.14442	2501	73	7.82445
162-982B-16H-2-A 40	140.4	155.14	154.85	5.14943	5.14468	2638	42	7.87778
162-982B-16H-2-A 42	140.42	155.16	154.87	5.14976	5.14521	3014	69	8.01102
162-982B-16H-2-A 44	140.44	155.18	154.89	5.1501	5.14574	2550	69	7.84385
162-982B-16H-2-A 46	140.46	155.2	154.91	5.15043	5.14626	2907	63	7.97488
162-982B-16H-2-A 48	140.48	155.22	154.93	5.15077	5.14679	3156	70	8.05706
162-982B-16H-2-A 51	140.51	155.25	154.96	5.15127	5.14758	3502	60	8.16109
162-982B-16H-2-A 52	140.52	155.26	154.97	5.15144	5.14785	3356	63	8.11851
162-982B-16H-2-A 54	140.54	155.28	154.99	5.15177	5.14838	3464	52	8.15018
162-982B-16H-2-A 56	140.56	155.3	155.01	5.15211	5.14891	4124	82	8.32458
162-982B-16H-2-A 57	140.57	155.31	155.02	5.15227	5.14917	4357	159	8.37954
162-982B-16H-2-A 61	140.61	155.35	155.06	5.15294	5.15023	3577	101	8.18228
162-982B-16H-2-A 62	140.62	155.36	155.07	5.15311	5.15049	3479	91	8.1545
162-982B-16H-2-A 65	140.65	155.39	155.1	5.15361	5.15128	2550	213	7.84385
162-982B-16H-2-A 66	140.66	155.4	155.11	5.15378	5.15155	2550	179	7.84385
162-982B-16H-2-A 67	140.67	155.41	155.12	5.15395	5.15181	6964	180	8.84851
162-982B-16H-2-A 70	140.7	155.44	155.15	5.15445	5.1526	6423	168	8.76764
162-982B-16H-2-A 73	140.73	155.47	155.18	5.15495	5.1534	2810	53	7.94094
162-982B-16H-2-A 74	140.74	155.48	155.19	5.15512	5.15366	4315	159	8.36985
162-982B-16H-2-A 76	140.76	155.5	155.21	5.15546	5.15419	4030	70	8.30152
162-982B-16H-2-A 78	140.78	155.52	155.23	5.15579	5.15472	3359	77	8.1194
162-982B-16H-2-A 79	140.79	155.53	155.24	5.15596	5.15498	2808	102	7.94023
162-982B-16H-2-A 82	140.82	155.56	155.27	5.15646	5.15577	2587	53	7.85825
162-982B-16H-2-A 84	140.84	155.58	155.29	5.15679	5.1563	2236	72	7.71244
162-982B-16H-2-A 86	140.86	155.6	155.31	5.15713	5.15683	2495	30	7.82204
162-982B-16H-2-A 88	140.88	155.62	155.33	5.15746	5.15736	4056	83	8.30795
162-982B-16H-2-A 89	140.89	155.63	155.34	5.15763	5.15762	4150	78	8.33086
162-982B-16H-2-A 92	140.92	155.66	155.37	5.15813	5.15842	2095	79	7.64731
162-982B-16H-2-A 94	140.94	155.68	155.39	5.15847	5.15894	2288	72	7.73543
162-982B-16H-2-A 96	140.96	155.7	155.41	5.1588	5.15947	2247	70	7.71735
162-982B-16H-2-A 98	140.98	155.72	155.43	5.15914	5.16	2247	47	7.71735
162-982B-16H-2-A 99	140.99	155.73	155.44	5.15931	5.16016	2076	39	7.6382
162-982B-16H-2-A 102	141.02	155.76	155.47	5.15981	5.16066	2409	54	7.78697
162-982B-16H-2-A 104	141.04	155.78	155.49	5.16014	5.16098	2358	80	7.76557
162-982B-16H-2-A 106	141.06	155.8	155.51	5.16048	5.16131	2309	43	7.74457
162-982B-16H-2-A 109	141.09	155.83	155.54	5.16098	5.1618	2325	92	7.75148
162-982B-16H-2-A 110	141.1	155.84	155.55	5.16115	5.16197	2409	48	7.78697
162-982B-16H-2-A 112	141.12	155.86	155.57	5.16148	5.1623	2415	5	7.78945
162-982B-16H-2-A 113	141.13	155.87	155.58	5.16165	5.16246	2295	80	7.73849
162-982B-16H-2-A 116	141.16	155.9	155.61	5.16215	5.16295	2234	54	7.71155
162-982B-16H-2-A 118	141.18	155.92	155.63	5.16249	5.16328	2068	24	7.63434
162-982B-16H-2-A 120	141.2	155.94	155.65	5.16282	5.16361	2129	47	7.66341
162-982B-16H-2-A 122	141.22	155.96	155.67	5.16316	5.16394	2387	54	7.77779
162-982B-16H-2-A 123	141.23	155.97	155.68	5.16332	5.1641	2341	33	7.75833
162-982B-16H-2-A 126	141.26	156	155.71	5.16383	5.16459	2235	43	7.712
162-982B-16H-2-A 128	141.28	156.02	155.73	5.16416	5.16492	2061	53	7.63095
162-982B-16H-2-A 129	141.29	156.03	155.74	5.16433	5.16508	2218	55	7.70436
162-982B-16H-2-A 132	141.32	156.06	155.77	5.16483	5.16558	2176	59	7.68524
162-982B-16H-2-A 134	141.34	156.08	155.79	5.16517	5.1659	2722	57	7.90912
162-982B-16H-2-A 135	141.35	156.09	155.8	5.16533	5.16607	2616	27	7.8694
162-982B-16H-2-A 140	141.4	156.14	155.85	5.16617	5.16689	2816	52	7.94307
162-982B-16H-2-A 142	141.42	156.16	155.87	5.16651	5.16722	2796	44	7.93595
162-982B-16H-2-A 144	141.44	156.18	155.89	5.16684	5.16754	2960	26	7.99294
162-982B-16H-2-A 148	141.48	156.22	155.93	5.16751	5.1682	3134	34	8.05007
162-982B-16H-3-A 2	141.52	156.26	155.97	5.16818	5.16886	3142	61	8.05261
162-982B-16H-3-A 4	141.54	156.28	155.99	5.16852	5.16918	3306	32	8.10349
162-982B-16H-3-A 5	141.55	156.29	156	5.16868	5.16935	3289	47	8.09834
162-982B-16H-3-A 9.5	141.6	156.34	156.05	5.16952	5.17017	3228	30	8.07962
162-982B-16H-3-A 11	141.61	156.35	156.06	5.16969	5.17033	3465	52	8.15047
162-982B-16H-3-A 12	141.62	156.36	156.07	5.16986	5.1705	3432	33	8.1409
162-982B-16H-3-A 14	141.64	156.38	156.09	5.17019	5.17082	3129	61	8.04847
162-982B-16H-3-A 15	141.65	156.39	156.1	5.17036	5.17099	3139	36	8.05166
162-982B-16H-3-A 21	141.71	156.45	156.16	5.17136	5.17197	2802	17	7.93809
162-982B-16H-3-A 22	141.72	156.46	156.17	5.17153	5.17214	2844	27	7.95297
162-982B-16H-3-A 23.5	141.74	156.48	156.19	5.17186	5.17246	2411	55	7.7878
162-982B-16H-3-A 36	141.86	156.6	156.31	5.17387	5.17443	1734	69	7.45819
162-982B-16H-3-A 39.5	141.9	156.64	156.35	5.17454	5.17509	1979	66	7.59035
162-982B-16H-3-A 41	141.91	156.65	156.36	5.17471	5.17525	1943	51	7.57199
162-982B-16H-3-A 42	141.92	156.66	156.37	5.17488	5.17542	2036	45	7.61874
162-982B-16H-3-A 43	141.93	156.67	156.38	5.17505	5.17558	2047	44	7.62413
162-982B-16H-3-A 44.5	141.95	156.69	156.4	5.17538	5.17591	1543	71	7.34148
162-982B-16H-3-A 49.5	142	156.74	156.45	5.17622	5.17673	1851	45	7.52348
162-982B-16H-3-A 51	142.01	156.75	156.46	5.17639	5.17689	1639	63	7.40184
162-982B-16H-3-A 52	142.02	156.76	156.47	5.17655	5.17706	1576	40	7.36265
162-982B-16H-3-A 54	142.04	156.78	156.49	5.17689	5.17738	1607	44	7.38212
162-982B-16H-3-A 55	142.05	156.79	156.5	5.17706	5.17755	1495	24	7.30988
162-982B-16H-3-A 59.5	142.1	156.84	156.55	5.17789	5.17837	1320	28	7.18539
162-982B-16H-3-A 61	142.11	156.85	156.56	5.17806	5.17853	1468	58	7.29166
162-982B-16H-3-A 62	142.12	156.86	156.57	5.17823	5.1787	1246	65	7.12769
162-982B-16H-3-A 64	142.14	156.88	156.59	5.17856	5.17902	1381	10	7.23056
162-982B-16H-3-A 69.5	142.2	156.94	156.65	5.17957	5.18001	1385	44	7.23346
162-982B-16H-3-A 71	142.21	156.95	156.66	5.17973	5.18017	1558	52	7.35116
162-982B-16H-3-A 72	142.22	156.96	156.67	5.1799	5.18034	1393	41	7.23921
162-982B-16H-3-A 74	142.24	156.98	156.69	5.18024	5.18066	1399	61	7.24351
162-982B-16H-3-A 75	142.25	156.99	156.7	5.1804	5.18083	1409	44	7.25064
162-982B-16H-3-A 79.5	142.3	157.04	156.75	5.18124	5.18165	1547	43	7.34407
162-982B-16H-3-A 81	142.31	157.05	156.76	5.18141	5.18181	1572	80	7.3601
162-982B-16H-3-A 82	142.32	157.06	156.77	5.18158	5.18198	1533	46	7.33498
162-982B-16H-3-A 84	142.34	157.08	156.79	5.18191	5.1823	1450	64	7.27932
162-982B-16H-3-A 85	142.35	157.09	156.8	5.18208	5.18247	1443	78	7.27448
162-982B-16H-3-A 86	142.36	157.1	156.81	5.18225	5.18263	1538	67	7.33824
162-982B-16H-3-A 89.5	142.4	157.14	156.85	5.18292	5.18329	1523	30	7.32844
162-982B-16H-3-A 91	142.41	157.15	156.86	5.18308	5.18345	1656	3	7.41216
162-982B-16H-3-A 92	142.42	157.16	156.87	5.18325	5.18362	1447	29	7.27725
162-982B-16H-3-A 94	142.44	157.18	156.89	5.18359	5.18394	1571	11	7.35947
162-982B-16H-3-A 96	142.46	157.2	156.91	5.18392	5.18427	1477	71	7.29777
162-982B-16H-3-A 100	142.5	157.24	156.95	5.18459	5.18493	1335	94	7.19669
162-982B-16H-3-A 102	142.52	157.26	156.97	5.18493	5.18526	1548	-3	7.34472
162-982B-16H-3-A 104	142.54	157.28	156.99	5.18526	5.18558	1418	12	7.257
162-982B-16H-3-A 105	142.55	157.29	157	5.18543	5.18575	1490	69	7.30653
162-982B-16H-3-A 109.5	142.6	157.34	157.05	5.18626	5.18657	1548	47	7.34472
162-982B-16H-3-A 111	142.61	157.35	157.06	5.18643	5.18673	1435	54	7.26892
162-982B-16H-3-A 112	142.62	157.36	157.07	5.1866	5.1869	1563	34	7.35436
162-982B-16H-3-A 114	142.64	157.38	157.09	5.18693	5.18722	1582	43	7.36645
162-982B-16H-3-A 115	142.65	157.39	157.1	5.1871	5.18739	1447	60	7.27725
162-982B-16H-3-A 116	142.66	157.4	157.11	5.18727	5.18755	1407	13	7.24922
162-982B-16H-3-A 121	142.71	157.45	157.16	5.18811	5.18837	1390	37	7.23706
162-982B-16H-3-A 122	142.72	157.46	157.17	5.18827	5.18854	1284	44	7.15774
162-982B-16H-3-A 124	142.74	157.48	157.19	5.18861	5.18886	1372	26	7.22402
162-982B-16H-3-A 125	142.75	157.49	157.2	5.18878	5.18903	1416	38	7.25559
162-982B-16H-3-A 129.5	142.8	157.54	157.25	5.18961	5.18985	1348	86	7.20638
162-982B-16H-3-A 131	142.81	157.55	157.26	5.18978	5.19001	1436	55	7.26962
162-982B-16H-3-A 132	142.82	157.56	157.27	5.18995	5.19018	1302	22	7.17166
162-982B-16H-3-A 134	142.84	157.58	157.29	5.19028	5.1905	1393	29	7.23921
162-982B-16H-3-A 135	142.85	157.59	157.3	5.19045	5.19067	1378	50	7.22839
162-982B-16H-3-A 141	142.91	157.65	157.36	5.19146	5.19165	1511	62	7.32053
162-982B-16H-3-A 142	142.92	157.66	157.37	5.19162	5.19182	1577	31	7.36328
162-982B-16H-3-A 144	142.94	157.68	157.39	5.19196	5.19214	1468	50	7.29166
162-982B-16H-3-A 145	142.95	157.69	157.4	5.19213	5.19231	1361	61	7.21598
162-982B-16H-4-A 2	143.02	157.76	157.47	5.1933	5.19346	1326	26	7.18992
162-982B-16H-4-A 4	143.04	157.78	157.49	5.19363	5.19378	1454	31	7.28207
162-982B-16H-4-A 6	143.06	157.8	157.51	5.19397	5.19411	1464	19	7.28893
162-982B-16H-4-A 9.5	143.1	157.84	157.55	5.19464	5.19477	1450	47	7.27932
162-982B-16H-4-A 11	143.11	157.85	157.56	5.1948	5.19493	1445	52	7.27586
162-982B-16H-4-A 12	143.12	157.86	157.57	5.19497	5.1951	1599	29	7.37713
162-982B-16H-4-A 14	143.14	157.88	157.59	5.19531	5.19542	1411	85	7.25205
162-982B-16H-4-A 16	143.16	157.9	157.61	5.19564	5.19575	1607	64	7.38212
162-982B-16H-4-A 19.5	143.2	157.94	157.65	5.19631	5.19641	1562	22	7.35372
162-982B-16H-4-A 21	143.21	157.95	157.66	5.19648	5.19657	1594	59	7.374
162-982B-16H-4-A 22	143.22	157.96	157.67	5.19665	5.19674	1522	46	7.32778
162-982B-16H-4-A 24	143.24	157.98	157.69	5.19698	5.19706	1707	83	7.44249
162-982B-16H-4-A 25	143.25	157.99	157.7	5.19715	5.19723	1804	16	7.49776
162-982B-16H-4-A 29.5	143.3	158.04	157.75	5.19799	5.19805	1763	39	7.47477
162-982B-16H-4-A 31	143.31	158.05	157.76	5.19815	5.19821	1620	55	7.39018
162-982B-16H-4-A 32	143.32	158.06	157.77	5.19832	5.19838	1637	44	7.40062
162-982B-16H-4-A 34	143.34	158.08	157.79	5.19866	5.1987	1755	-3	7.47022
162-982B-16H-4-A 36	143.36	158.1	157.81	5.19899	5.19903	1645	52	7.4055
162-982B-16H-4-A 39.5	143.4	158.14	157.85	5.19966	5.19969	1606	36	7.3815
162-982B-16H-4-A 41	143.41	158.15	157.86	5.19983	5.19985	1697	19	7.43662
162-982B-16H-4-A 42	143.42	158.16	157.87	5.2	5.20002	1590	80	7.37149
162-982B-16H-4-A 44	143.44	158.18	157.89	5.20033	5.20034	1684	47	7.42893
162-982B-16H-4-A 46	143.46	158.2	157.91	5.20067	5.20067	1697	81	7.43662
162-982B-16H-4-A 50	143.5	158.24	157.95	5.20145	5.20145	1618	41	7.38895
162-982B-16H-4-A 51	143.51	158.25	157.96	5.20168	5.20168	1743	28	7.46336
162-982B-16H-4-A 53	143.53	158.27	157.98	5.20213	5.20213	1571	7	7.35947
162-982B-16H-4-A 54	143.54	158.28	157.99	5.20235	5.20235	1751	61	7.46794
162-982B-16H-4-A 56	143.56	158.3	158.01	5.2028	5.2028	1795	38	7.49276
162-982B-16H-4-A 60	143.6	158.34	158.05	5.20371	5.20371	2005	38	7.6034
162-982B-16H-4-A 63	143.63	158.37	158.08	5.20438	5.20438	1792	52	7.49109
162-982B-16H-4-A 64	143.64	158.38	158.09	5.20461	5.20461	1884	72	7.54115
162-982B-16H-4-A 65	143.65	158.39	158.1	5.20483	5.20483	1723	50	7.45182
162-982B-16H-4-A 71	143.71	158.45	158.16	5.20619	5.20619	1802	26	7.49665
162-982B-16H-4-A 72	143.72	158.46	158.17	5.20641	5.20641	1658	34	7.41337
162-982B-16H-4-A 74	143.74	158.48	158.19	5.20686	5.20686	1665	66	7.41758
162-982B-16H-4-A 75.5	143.76	158.5	158.21	5.20732	5.20732	1904	88	7.55171
162-982B-16H-4-A 79.5	143.8	158.54	158.25	5.20822	5.20822	1947	62	7.57405
162-982B-16H-4-A 80.5	143.81	158.55	158.26	5.20844	5.20844	1756	39	7.47079
162-982B-16H-4-A 83	143.83	158.57	158.28	5.20889	5.20889	1948	6	7.57456
162-982B-16H-4-A 84	143.84	158.58	158.29	5.20912	5.20912	1866	52	7.53155
162-982B-16H-4-A 85	143.85	158.59	158.3	5.20935	5.20935	2000	53	7.6009
162-982B-16H-4-A 89.5	143.9	158.64	158.35	5.21047	5.21047	1919	44	7.55956
162-982B-16H-4-A 91	143.91	158.65	158.36	5.2107	5.2107	1642	6	7.40367
162-982B-16H-4-A 92	143.92	158.66	158.37	5.21092	5.21092	1820	28	7.50659
162-982B-16H-4-A 94	143.94	158.68	158.39	5.21138	5.21138	1871	43	7.53423
162-982B-16H-4-A 95	143.95	158.69	158.4	5.2116	5.2116	1772	61	7.47986
162-982B-16H-4-A 96	143.96	158.7	158.41	5.21183	5.21183	1682	23	7.42774
162-982B-16H-4-A 99.5	144	158.74	158.45	5.21273	5.21273	1714	47	7.44659
162-982B-16H-4-A 101	144.01	158.75	158.46	5.21295	5.21295	1903	50	7.55119
162-982B-16H-4-A 102	144.02	158.76	158.47	5.21318	5.21318	1997	69	7.5994
162-982B-16H-4-A 104	144.04	158.78	158.49	5.21363	5.21363	2241	42	7.71468
162-982B-16H-4-A 105.5	144.06	158.8	158.51	5.21408	5.21408	2152	30	7.67415
162-982B-16H-4-A 109.5	144.1	158.84	158.55	5.21498	5.21498	2348	58	7.76132
162-982B-16H-4-A 111	144.11	158.85	158.56	5.21521	5.21521	2276	80	7.73017
162-982B-16H-4-A 112	144.12	158.86	158.57	5.21544	5.21544	2429	38	7.79523
162-982B-16H-4-A 113	144.13	158.87	158.58	5.21566	5.21566	2264	50	7.72489
162-982B-16H-4-A 115	144.15	158.89	158.6	5.21611	5.21611	2410	48	7.78738
162-982B-16H-4-A 116	144.16	158.9	158.61	5.21634	5.21634	2434	66	7.79729
162-982B-16H-4-A 119.5	144.2	158.94	158.65	5.21724	5.21724	2250	69	7.71869
162-982B-16H-4-A 121	144.21	158.95	158.66	5.21747	5.21747	2129	27	7.66341
162-982B-16H-4-A 122	144.22	158.96	158.67	5.21769	5.21769	2212	22	7.70165
162-982B-16H-4-A 123	144.23	158.97	158.68	5.21792	5.21792	2399	35	7.78281
162-982B-16H-4-A 126	144.26	159	158.71	5.21859	5.21859	2450	82	7.80384
162-982B-16H-4-A 129.5	144.3	159.04	158.75	5.2195	5.2195	2126	86	7.662
162-982B-16H-4-A 131	144.31	159.05	158.76	5.21972	5.21972	2524	75	7.8336
162-982B-16H-4-A 132	144.32	159.06	158.77	5.21995	5.21995	2870	33	7.96207
162-982B-16H-4-A 134	144.34	159.08	158.79	5.2204	5.2204	2404	83	7.78489
162-982B-16H-4-A 135	144.35	159.09	158.8	5.22062	5.22062	2467	48	7.81076
162-982B-16H-4-A 136	144.36	159.1	158.81	5.22085	5.22085	2625	60	7.87284
162-982B-16H-4-A 140	144.4	159.14	158.85	5.22175	5.22175	2626	28	7.87322
162-982B-16H-4-A 141	144.41	159.15	158.86	5.22198	5.22198	2558	37	7.84698
162-982B-16H-4-A 142	144.42	159.16	158.87	5.2222	5.2222	2742	86	7.91644
162-982B-16H-4-A 144.5	144.45	159.19	158.9	5.22288	5.22288	2709	78	7.90433
162-982B-16H-5-A 2	144.52	159.26	158.97	5.22446	5.22446	2465	58	7.80995
162-982B-16H-5-A 4	144.54	159.28	158.99	5.22491	5.22491	2497	31	7.82285
162-982B-16H-5-A 5	144.55	159.29	159	5.22514	5.22514	2720	26	7.90839
162-982B-16H-5-A 10	144.6	159.34	159.05	5.22626	5.22626	2486	38	7.81843
162-982B-16H-5-A 12	144.62	159.36	159.07	5.22671	5.22671	2389	66	7.77863
162-982B-16H-5-A 14	144.64	159.38	159.09	5.22717	5.22717	2310	22	7.745
162-982B-16H-5-A 15	144.65	159.39	159.1	5.22739	5.22739	2400	19	7.78322
162-982B-16H-5-A 19.5	144.7	159.44	159.15	5.22852	5.22852	2184	53	7.68891
162-982B-16H-5-A 21	144.71	159.45	159.16	5.22874	5.22874	2296	41	7.73892
162-982B-16H-5-A 22	144.72	159.46	159.17	5.22897	5.22897	2113	41	7.65586
162-982B-16H-5-A 24	144.74	159.48	159.19	5.22942	5.22942	2121	16	7.65964
162-982B-16H-5-A 25	144.75	159.49	159.2	5.22965	5.22965	2301	37	7.7411
162-982B-16H-5-A 29.5	144.8	159.54	159.25	5.23077	5.23077	2171	31	7.68294
162-982B-16H-5-A 30	144.8	159.54	159.25	5.23077	5.23077	2181	38	7.68754
162-982B-16H-5-A 31	144.81	159.55	159.26	5.231	5.231	2386	57	7.77737
162-982B-16H-5-A 32	144.82	159.56	159.27	5.23123	5.23123	2084	78	7.64204
162-982B-16H-5-A 33	144.83	159.57	159.28	5.23145	5.23145	2029	49	7.6153
162-982B-16H-5-A 39.5	144.9	159.64	159.35	5.23303	5.23303	2125	38	7.66153
162-982B-16H-5-A 40	144.9	159.64	159.35	5.23303	5.23303	2211	41	7.7012
162-982B-16H-5-A 41	144.91	159.65	159.36	5.23326	5.23326	2110	61	7.65444
162-982B-16H-5-A 42	144.92	159.66	159.37	5.23348	5.23348	2329	48	7.75319
162-982B-16H-5-A 43	144.93	159.67	159.38	5.23371	5.23371	2277	48	7.73061
162-982B-16H-5-A 45	144.95	159.69	159.4	5.23416	5.23416	2488	71	7.81923
162-982B-16H-5-A 49.5	145	159.74	159.45	5.23529	5.23529	2380	66	7.77486
162-982B-16H-5-A 51	145.01	159.75	159.46	5.23551	5.23551	2298	42	7.73979
162-982B-16H-5-A 52	145.02	159.76	159.47	5.23574	5.23574	2446	64	7.80221
162-982B-16H-5-A 54	145.04	159.78	159.49	5.23619	5.23619	2342	77	7.75876
162-982B-16H-5-A 55.5	145.06	159.8	159.51	5.23664	5.23664	2362	55	7.76726
162-982B-16H-5-A 59.5	145.1	159.84	159.55	5.23754	5.23754	2090	40	7.64492
162-982B-16H-5-A 61	145.11	159.85	159.56	5.23777	5.23777	2171	22	7.68294
162-982B-16H-5-A 62	145.12	159.86	159.57	5.23799	5.23799	2121	53	7.65964
162-982B-16H-5-A 64	145.14	159.88	159.59	5.23844	5.23844	2257	52	7.72179
162-982B-16H-5-A 65	145.15	159.89	159.6	5.23867	5.23867	1892	59	7.54539
162-982B-16H-5-A 66	145.16	159.9	159.61	5.23889	5.23889	2050	30	7.6256
162-982B-16H-5-A 71	145.21	159.95	159.66	5.24002	5.24002	1756	86	7.47079
162-982B-16H-5-A 72	145.22	159.96	159.67	5.24025	5.24025	1988	81	7.59488
162-982B-16H-5-A 74	145.24	159.98	159.69	5.2407	5.2407	1572	41	7.3601
162-982B-16H-5-A 76	145.26	160	159.71	5.24115	5.24115	1797	26	7.49387
162-982B-16H-5-A 79.5	145.3	160.04	159.75	5.24205	5.24205	1646	59	7.4061
162-982B-16H-5-A 81	145.31	160.05	159.76	5.24228	5.24228	1904	24	7.55171
162-982B-16H-5-A 82	145.32	160.06	159.77	5.2425	5.2425	1755	48	7.47022
162-982B-16H-5-A 84	145.34	160.08	159.79	5.24295	5.24295	1829	53	7.51152
162-982B-16H-5-A 85	145.35	160.09	159.8	5.24318	5.24318	1755	19	7.47022
162-982B-16H-5-A 89.5	145.4	160.14	159.85	5.24431	5.24431	1889	74	7.5438
162-982B-16H-5-A 91	145.41	160.15	159.86	5.24453	5.24453	1767	56	7.47704
162-982B-16H-5-A 92	145.42	160.16	159.87	5.24476	5.24476	1802	64	7.49665
162-982B-16H-5-A 94	145.44	160.18	159.89	5.24521	5.24521	1880	37	7.53903
162-982B-16H-5-A 96	145.46	160.2	159.91	5.24566	5.24566	1901	33	7.55014
162-982B-16H-5-A 100	145.5	160.24	159.95	5.24656	5.24656	1635	44	7.3994
162-982B-16H-5-A 101	145.51	160.25	159.96	5.24679	5.24679	1901	30	7.55014
162-982B-16H-5-A 102	145.52	160.26	159.97	5.24702	5.24702	1830	31	7.51207
162-982B-16H-5-A 104	145.54	160.28	159.99	5.24747	5.24747	1860	86	7.52833
162-982B-16H-5-A 105	145.55	160.29	160	5.24769	5.24769	1853	34	7.52456
162-982B-16H-5-A 110	145.6	160.34	160.05	5.24882	5.24882	1767	13	7.47704
162-982B-16H-5-A 111	145.61	160.35	160.06	5.24905	5.24905	1958	52	7.57968
162-982B-16H-5-A 112	145.62	160.36	160.07	5.24927	5.24927	1801	56	7.4961
162-982B-16H-5-A 114	145.64	160.38	160.09	5.24972	5.24972	1978	38	7.58984
162-982B-16H-5-A 115.5	145.66	160.4	160.11	5.25017	5.25017	1943	61	7.57199
[truncated: 3,781 more rows]

## Sheet: Site 982 XRF data Hole C
IODP ID	mbsf	mcd (shipboard)	rmcd (this study)	AgeD17MT (this study)	AgeD17FT (this study)	Silica (counts)	Zirconium (counts)	ln(Silica) (counts)
[truncated: 1,535 more rows]
