# Supplementary material for: Reinforcing the North Atlantic backbone: revision and extension of the composite splice at ODP Site 982
Source: Copernicus journal article supplement (doi:10.5194/cp-14-321-2018), 2018-03-08
Supplement: Supplementary file 3 [file ST4 - Revised Offsets Site 982.xlsx]

## Sheet: Revised offsets Hole 982A
Key	BOLD = changes compared to shipboard			Italics = shipboard splice, but shifted to accommodate new offsets higher in the section.
Core	Depth	Shipboard Offset	Revised Offset	Change in offset	shipboard composite depth	Revised composite depth
	(mbsf [m CSF-A])	(m)	(m)	(m)	(mcd [m CCSF-A])	(rmcd [m rCCSF-A])
162-982A-
1H	0	0	0	0	0	0
2H	8.2	1.3	1.3	0	9.5	9.5
3H	17.7	2.08	2.08	0	19.78	19.78
4H	27.2	2.5	2.5	0	29.7	29.7
5H	36.7	3.93	3.93	0	40.63	40.63
6H	46.2	6.53	6.53	0	52.73	52.73
7H	55.7	7.97	7.97	0	63.67	63.67
8H	65.2	8.78	8.78	0	73.98	73.98
9H	74.7	9.83	9.83	0	84.53	84.53
10H	84.2	11.43	11.43	0	95.63	95.63
11H	93.7	12.35	12.35	0	106.05	106.05
12H	103.2	13.49	13.49	0	116.69	116.69
13H	112.7	14.92	14.82	-0.1	127.62	127.52
14H	122.2	15.82	15.72	-0.1	138.02	137.92
15H	131.7	17.28	16.99	-0.29	148.98	148.69
16H	141.2	18.12	17.97	-0.15	159.32	159.17
17H	150.7	19	18.85	-0.15	169.7	169.55
18H	160.2	19.5	19.35	-0.15	179.7	179.55
19H	169.7	20.78	20.7	-0.08	190.48	190.4
20H	179.2	20.34	21.7	1.36	199.54	200.9
21H	188.7	21.05	22.96	1.91	209.75	211.66
22H	198.2	21.93	23.51	1.58	220.13	221.71
23H	207.7	23.2	24.84	1.64	230.9	232.54
24H	217.2	24.19	25.24	1.05	241.39	242.44
25H	226.7	25.38	27.93	2.55	252.08	254.63
26H	236.2	25.38	29.66	4.28	261.58	265.86
27H	245.7	25.38	34.46	9.08	271.08	280.16

## Sheet: Revised offsets Hole 982B
Key	BOLD = changes compared to shipboard			Italics = shipboard splice, but shifted to accommodate new offsets higher in the section.
Core	Depth	Shipboard Offset	Revised Offset	Change in offset	shipboard composite depth	Revised composite depth
	(mbsf [m CSF-A])	(m)	(m)	(m)	(mcd [m CCSF-A])	(rmcd [m rCCSF-A])
162-982B-
1H	0	0	0	0	0	0
2H	5.5	1.32	1.32	0	6.82	6.82
3H	15	2.16	2.16	0	17.16	17.16
4H	24.5	3.08	3.08	0	27.58	27.58
5H	34	4.08	4.08	0	38.08	38.08
6H	43.5	5.51	5.51	0	49.01	49.01
7H	53	5.77	5.77	0	58.77	58.77
8H	62.5	6.83	6.83	0	69.33	69.33
9H	72	7.94	7.94	0	79.94	79.94
10H	81.5	9.21	9.21	0	90.71	90.71
11H	91	10.07	10.07	0	101.07	101.07
12H	100.5	10.49	10.49	0	110.99	110.99
13H	110	11.54	11.54	0	121.54	121.54
14H	119.5	12.6	12.5	-0.1	132.1	132
15H	129	14.06	13.7	-0.36	143.06	142.7
16H	138.5	14.74	14.45	-0.29	153.24	152.95
17H	148	15.59	15.44	-0.15	163.59	163.44
18H	157.5	16.58	16.43	-0.15	174.08	173.93
19H	167	17.79	17.52	-0.27	184.79	184.52
20H	176.5	18.66	18.37	-0.29	195.16	194.87
21H	186	19.6	19.46	-0.14	205.6	205.46
22H	195.5	19.01	20.62	1.61	214.51	216.12
23H	205	20.42	21.96	1.54	225.42	226.96
24H	214.5	19.45	23.39	3.94	233.95	237.89
25H	224	20.59	25.09	4.5	244.59	249.09
26H	233.5	20.59	26.89	6.3	254.09	260.39
27X	243	20.59	28.42	7.83	263.59	271.42
28X	249.3	20.59	29.6	9.01	269.89	278.9
29X	258.9	20.59	29.67	9.08	279.49	288.57
30X		20.59	29.67	9.08
31X	278.2	20.59	29.67	9.08	298.79	307.87
32X	287.8	20.59	29.67	9.08	308.39	317.47
33X	297.4	20.59	29.67	9.08	317.99	327.07
34X	307.1	20.59	29.67	9.08	327.69	336.77
35X	316.7	20.59	29.67	9.08	337.29	346.37
36X	326.3	20.59	29.67	9.08	346.89	355.97
37X	336	20.59	29.67	9.08	356.59	365.67
38X	345.6	20.59	29.67	9.08	366.19	375.27
39X	355.2	20.59	29.67	9.08	375.79	384.87
40X	364.9	20.59	29.67	9.08	385.49	394.57
41X	374.5	20.59	29.67	9.08	395.09	404.17
42X	384.1	20.59	29.67	9.08	404.69	413.77
43X	393.8	20.59	29.67	9.08	414.39	423.47
44X	403.4	20.59	29.67	9.08	423.99	433.07
45X	413	20.59	29.67	9.08	433.59	442.67
46X	422.6	20.59	29.67	9.08	443.19	452.27
47X	432.2	20.59	29.67	9.08	452.79	461.87
48X	441.8	20.59	29.67	9.08	462.39	471.47
49X	451.4	20.59	29.67	9.08	471.99	481.07
50X	461	20.59	29.67	9.08	481.59	490.67
51X	470.6	20.59	29.67	9.08	491.19	500.27
52X	480.2	20.59	29.67	9.08	500.79	509.87
53X	489.7	20.59	29.67	9.08	510.29	519.37
54X	499.3	20.59	29.67	9.08	519.89	528.97
55X	508.9	20.59	29.67	9.08	529.49	538.57
56X	518.5	20.59	29.67	9.08	539.09	548.17
57X	528.1	20.59	29.67	9.08	548.69	557.77
58X	537.7	20.59	29.67	9.08	558.29	567.37
59X		20.59	29.67	9.08
60X	557	20.59	29.67	9.08	577.59	586.67
61X	566.7	20.59	29.67	9.08	587.29	596.37
62X	576.4	20.59	29.67	9.08	596.99	606.07
63X		20.59	29.67	9.08
64X		20.59	29.67	9.08
65X		20.59	29.67	9.08

## Sheet: Revised offsets Hole 982C
Key	BOLD = changes compared to shipboard			Italics = shipboard splice, but shifted to accommodate new offsets higher in the section.
Core	Depth	Shipboard Offset	Revised Offset	Change in offset	shipboard composite depth	Revised composite depth
	(mbsf [m CSF-A])	(m)	(m)	(m)	(mcd [m CCSF-A])	(rmcd [m rCCSF-A])
162-982C-
1H	0	0.15	0.15	0	0.15	0.15
2H	3.8	-0.8	0.8	1.6	3	4.6
3H	13.3	-0.02	0.02	0.04	13.28	13.32
4H	22.8	3.52	3.52	0	26.32	26.32
5H	32.3	3.26	3.26	0	35.56	35.56
6H	41.8	4.58	4.58	0	46.38	46.38
7H	51.3	5.65	5.65	0	56.95	56.95
8H	60.8	5.79	5.79	0	66.59	66.59
9H	70.3	5.82	5.82	0	76.12	76.12
10H	79.8	7.19	7.19	0	86.99	86.99
11H	89.3	8.17	8.17	0	97.47	97.47
12H	98.8	9.05	9.05	0	107.85	107.85
13H	108.3	10.45	10.45	0	118.75	118.75
14H	117.8	11.13	11.13	0	128.93	128.93
15H	127.3	13.08	12.92	-0.16	140.38	140.22
16H	136.8	13.88	13.52	-0.36	150.68	150.32
17H	146.3	14.45	14.3	-0.15	160.75	160.6
18H	155.8	15.89	15.74	-0.15	171.69	171.54
19H	165.3	16.43	16.16	-0.27	181.73	181.46
20H	174.8	18.41	17.97	-0.44	193.21	192.77
21H	184.3	19.9	18.95	-0.95	204.2	203.25
22H	193.8	18.88	20.39	1.51	212.68	214.19
23H	203.3	19.79	21.33	1.54	223.09	224.63
24H	212.8	19.6	23.54	3.94	232.4	236.34
25H	222.3	20.66	25.23	4.57	242.96	247.53
26H	231.8	20.66	26.96	6.3	252.46	258.76
27H	241.3	20.66	29.74	9.08	261.96	271.04

## Sheet: Revised offsets Hole 982D
Key	BOLD = changes compared to shipboard			Italics = shipboard splice, but shifted to accommodate new offsets higher in the section.
Core	Depth	Shipboard Offset	Revised Offset	Change in offset	shipboard composite depth	Revised composite depth
	(mbsf [m CSF-A])	(m)	(m)	(m)	(mcd [m CCSF-A])	(rmcd [m rCCSF-A])
162-982D-
1H	20	2.18	2.18	0	22.18	22.18
