# Supplementary material for: Reinforcing the North Atlantic backbone: revision and extension of the composite splice at ODP Site 982
Source: Copernicus journal article supplement (doi:10.5194/cp-14-321-2018), 2018-03-08
Supplement: Supplementary file 5 [file ST6 - Nanno Poly Age (01.03.2018).xlsx]

## Sheet: U1337 Polynomial Nanno Datums
	Biohorizon (from Site 982 a)	Type	Top and Bottom Sample ID, mbsf rmcd a		mid Depth rmcd	Depth error	GTS2012 Age b
			TOP 162-982	TOP 162-982	(m)	(m)	(Ma )
	LO P. lacunosa	Nannofossil	B-2H-2-W 124 8.24 9.56	B-2H-3-W 144 9.94 11.26	10.41	0.85	0.44
	FO Gephyrocapsa spp. C/D	Nannofossil	B-3H-3-W 65 18.65 20.81	B-3H-4-W 10 19.6 21.76	21.285	0.475	0.61
	LO C.macintyrei	Nannofossil	B-4H-2-W 124 27.24 30.32	B-4H-3-W 110 28.6 31.68	31	0.68	1.6
	FO Gr. inflata	Planktonic foraminifera	A-4H-CC-W 10.5 36.99 39.49	A-5H-CC-W 17.5 46.54 50.47	44.98	5.49	2.1
	LO D.surculus T	Nannofossil	B-7H-1-W 18 53.18 58.95	B-7H-2-W 18 54.68 60.45	59.7	0.75	2.49
	LO D. tamalis T	Nannofossil	A-7H-5-W 18 61.88 69.85	A-7H-6-W 18 63.38 71.35	70.6	0.75	2.8
	LO Gr. cf. crassula T	Planktonic foraminifera	A-8H-CC-W 12 74.97 83.75	A-9H-CC-W 23 83.61 93.44	88.59	4.85	3.29
	LO A.primus T	Nannofossil	A-14H-3-W 10 125.3 141.02	A-14H-4-W 10 126.8 142.52	141.77	0.75	4.5
	LO D. quinqueramus	Nannofossil	A-18H-4-W 10 164.8 184.15	A-18H-5-W 10 166.3 185.65	184.9	0.75	5.59
	d. to s. N. atlantica	Planktonic foraminifera	B-26H-3-W 20 236.7 263.59	B-26H-4-W 20 238.2 265.09	264.34	0.75	6.99
	FO D. surculus	Nannofossil	B-26H-CC-W 19 242.95 269.84	B-27X-CC-W 18.5 249.49 277.91	273.872	4.03	7.79
	FO N. acostaensis	Planktonic foraminifera	B-35X-CC-W 35.5 323.06 352.73	B-36X-1-W 19 326.49 356.16	354.443	1.72	9.83
	LO Gr. mayeri	Planktonic foraminifera	B-35X-CC-W 35.5 323.06 352.73	B-36X-1-W 19 326.49 356.16	354.443	1.72	10.46
	LO C. miopelagicus	Nannofossil	B-41X-2-W 10 376.1 405.77	B-41X-3-W 10 377.6 407.27	406.52	0.75	10.97
	LO C. floridanus	Nannofossil	B-49X-1-W 10 451.5 481.17	B-49X-2-W 10 453 482.67	481.92	0.75	11.85
	LO S. heteromorphus	Nannofossil	B-47X-CC-W 45.5 438.66 468.33	B-48X-CC-W 38.5 450.14 479.81	474.065	5.74	13.53
	FO O. suturalis	Planktonic foraminifera	B-53X-CC-W 35 498.62 528.29	B-54X-1-W 41 499.71 529.38	528.835	0.54	15.1
	LO C. dissimilis	Planktonic foraminifera	B-57X-CC-W 34 535.72 565.39	B-58X-CC-W 30.5 541.59 571.26	568.322	2.93	17.54
	FO S. heteromorphus	Nannofossil	B-60X-CC-W 33.5 561.18 590.85	B-61X-CC-W 29.5 570.22 599.89	595.37	4.52	17.71
	LO S. belemnos	Nannofossil	B-60X-CC-W 33.5 561.18 590.85	B-61X-1-W 10 566.8 596.47	593.658	2.81	17.95
	Polynomial age model c		Age = (21.007 * depth) + (2.6974 *depth^2) + (-0.11423 * depth^3)
	a	Site 982 report (Shipboard scientific party Leg 162, 1997)
	b	Hilgen et al., 2012
