# Supplementary material for: Reinforcing the North Atlantic backbone: revision and extension of the composite splice at ODP Site 982
Source: Copernicus journal article supplement (doi:10.5194/cp-14-321-2018), 2018-03-08
Supplement: Supplementary file [file cp-14-321-2018-supplement-title-page.pdf › cp-14-321-2018-supplement-title-page.pdf]

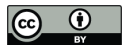

## *Supplement of*

# **Reinforcing the North Atlantic backbone: revision and extension of the composite splice at ODP Site 982**

**Anna Joy Drury et al.**

*Correspondence to:* Anna Joy Drury (ajdrury@marum.de)

- cp-14-321-2018-supplement-title-page.pdf
- Supplementary information Drury et al CP
  - .DS\_Store
  - Drury et al., 982 supplementary information.pdf
  - PANGAEA tables
    - \* .DS\_Store
    - \* ST1 - XRF data.xlsx
    - \* ST3 - Isotope data.xlsx
    - \* ST4 - Revised Offsets Site 982.xlsx
    - \* ST5 - Revised Splice Site 982 (01.03.2018).xlsx
    - \* ST6 - Nanno Poly Age (01.03.2018).xlsx
    - \* ST7 - Tuning overview.xlsx
- \_\_MACOSX
  - .\_Supplementary information Drury et al CP
  - Supplementary information Drury et al CP
    - \* .\_DS\_Store
    - \* .\_Drury et al., 982 supplementary information.pdf
    - \* .\_PANGAEA tables
    - \* PANGAEA tables

The copyright of individual parts of the supplement might differ from the CC BY 4.0 License.
